# Supplementary material for: Thermally-induced intramolecular [2 + 2] cycloaddition of allene-methylenecyclopropanes: expedient access to two separable spiropolycyclic heterocycles
Source: Royal Society of Chemistry journal article supplement (doi:10.1039/d2qo01473d), 2022-12-01
Supplement: d2qo01473d1.pdf [file d2qo01473d1.pdf]

## Supporting Information

# Thermally-Induced Intramolecular [2 + 2] Cycloaddition of Allene-Methylenecyclopropanes: Expedient Access to Two Separable Spiropolycyclic Heterocycles

Min Li,<sup>a</sup> Yin Wei<sup>\*b</sup> and Min Shi<sup>\*a,b</sup>

<sup>a</sup> Key Laboratory for Advanced Materials & Institute of Fine Chemicals, School of Chemistry & Molecular Engineering, East China University of Science and Technology, 130 Meilong Road, Shanghai 200237, P. R. China, <sup>b</sup> State Key Laboratory of Organometallic Chemistry, Center for Excellence in Molecular Synthesis, University of Chinese Academy of Sciences, Shanghai Institute of Organic Chemistry, Chinese Academy of Sciences, 345 Lingling Road, Shanghai 200032, P. R. China. weiyin@sioc.ac.cn, mshi@mail.sioc.ac.cn

## CONTENTS

|                                                            |      |
|------------------------------------------------------------|------|
| 1. General Remarks.....                                    | S2   |
| 2. General Procedure for the Synthesis of Substrates ..... | S3   |
| 3. General Procedure for the Synthesis of Products.....    | S7   |
| 3.1 Method .....                                           | S7   |
| 3.2 Reaction Setup .....                                   | S7   |
| 4. Mechanistic Investigations.....                         | S8   |
| 4.1 Computational Methods, Coordinates and Energies.....   | S8   |
| 4.1.1 Computational Details.....                           | S8   |
| 4.1.2 Computational Coordinates and Energies.....          | S9   |
| 5. Characterization Data of Substrates.....                | S45  |
| 6. Characterization Data of Products. ....                 | S103 |
| 7. X-ray Data.....                                         | S210 |
| 8. References.....                                         | S218 |

## 1. General Remarks

Melting points were determined on a digital melting point apparatus and temperatures were uncorrected. NMR spectra were recorded with Varian and Agi spectrometer at 400 MHz ( $^1\text{H}$  NMR), 100 MHz ( $^{13}\text{C}$  NMR) and 376 MHz ( $^{19}\text{F}$  NMR) in  $\text{CDCl}_3$ , respectively. Chemical shift was reported in ppm down field from internal TMS. Organic solvents used were dried by standard methods when necessary. Commercially available reagents were used without further purification. All reactions were monitored by TLC with Huanghai GF<sub>254</sub> silica gel coated plates. Flash column chromatography was carried out using 300-400 mesh silica gel at increased pressure. All reactions were performed under argon using standard Schlenk techniques. Infrared spectra were recorded on a Perkin-Elmer PE-983 spectrometer with absorption in  $\text{cm}^{-1}$ . Mass spectra were recorded by ESI and HRMS was measured on a HP-5989 instrument. The 8 W Blue LED (Manufacturer: Liangyuan-Light Factory, Model: PAR 38, Wavelength: 425 nm) was directly got from the supermarket.

## 2. General Procedure for the Synthesis of Substrates

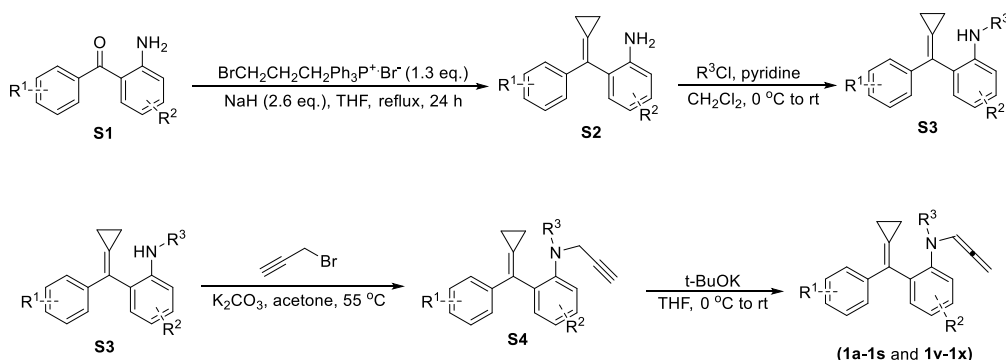

The procedure of preparing substrates **1** was slightly modified by the previous literature.<sup>1</sup> A solution of 3-bromopropyltriphenylphosphonium bromide (5.96 g, 13 mmol) and NaH (624 mg, 26 mmol) in THF (15 mL) was stirred at 65 °C in an oil bath under Ar for 12 h. Afterwards compound **S1** (10 mmol) in THF (10 mL) was added and the reaction solution was stirred at 65 °C in an oil bath for another 12 h. Upon completion, the reaction was cooled to room temperature and the mixture was filtered through a celite. The filtrate was concentrated under reduced pressure and the residue was purified by a silica gel flash chromatography (PE/EA = 80/1) to afford the products **S2** in moderate yields.

A solution of compounds **S2** (4.0 mmol) in  $\text{CH}_2\text{Cl}_2$  (15.0 mL) was stirred at 0 °C in an ice bath. Then pyridine (8.0 mmol) and the corresponding acyl chloride (6.0 mmol) were added in one portion, respectively; the resulting mixture was warmed to room temperature and stirred overnight. Upon completion, the mixture was washed with  $\text{CuSO}_4$  solution and dried over anhydrous  $\text{Na}_2\text{SO}_4$ . The solvent was removed under vacuum and the residue was purified by a flash column chromatography on silica gel (PE/EA = 30/1) to afford the products **S3** in moderate yields. A solution of compound **S3** (2.5 mmol) and  $\text{K}_2\text{CO}_3$  (5.0 mmol) in acetone (15.0 mL) was stirred at 55 °C, then, propargyl bromide (5.0 mmol) was added dropwise. Upon completion, the mixture is cooled and filtered through a celite, the solvent was removed under vacuum and the residue was purified by a flash column chromatography on silica gel (PE/EA = 10/1) to afford the products **S4** in good yields.

A solution of compound **S4** (2.0 mmol) in THF (15.0 mL) was stirred at 0 °C in an ice bath under Ar. Then  $t\text{-BuOK}$  (0.3 eq.) was added dropwise, and the resulting mixture was warmed to room temperature and stirred overnight. The solvent was removed under vacuum and the residue was

purified by a flash column chromatography on silica gel (PE/EA = 30/1) to afford the products **1a-1q**, and **1v-1x** in moderate yields.

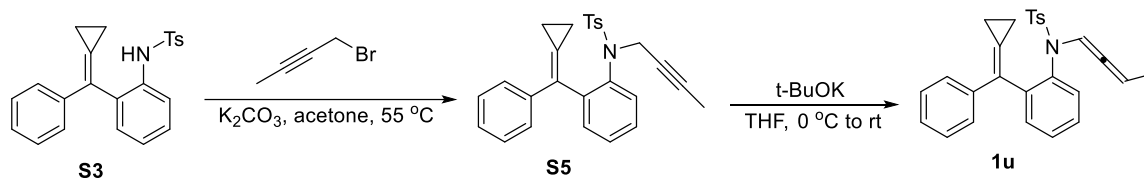

A solution of compound **S3** (2.5 mmol) and  $K_2CO_3$  (5.0 mmol) in acetone (15.0 mL) was stirred at 55 °C, then, 1-bromo-2-butyne (5.0 mmol) was added dropwise. Upon completion, the mixture is cooled and filtered through a celite, the solvent was removed under vacuum and the residue was purified by a flash column chromatography on silica gel (PE/EA = 10/1) to afford the product **S5** in good yield. A solution of compound **S5** (2.0 mmol) in THF (15.0 mL) was stirred at 0 °C in an ice bath under Ar. Then t-BuOK (0.3 eq.) was added dropwise, the resulting mixture was warmed to room temperature and stirred overnight. The solvent was removed under vacuum and the residue was purified by a flash column chromatography on silica gel (PE/EA = 30/1) to afford the product **1u**.

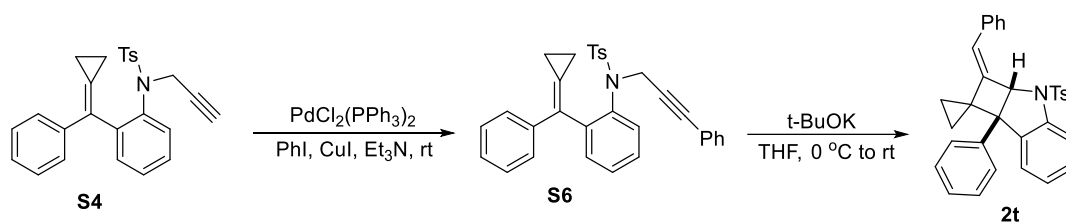

To a 50-mL oven-dried Schlenk tube containing a magnetic stirrer bar was mixed with **S4** (3.0 mmol),  $PdCl_2(PPh_3)_2$  (2 mol%) and CuI (4 mol%). Then deoxidized  $Et_3N$  (20 mL) is added under Ar. Subsequently, PhI (3.3 mmol) was added dropwise and the resulting mixture was stirred at room temperature. Upon completion, the mixture was filtered through a celite. The filtrate was concentrated under reduced pressure and the residue was purified by a silica gel flash chromatography (PE/EA = 10/1) to afford the product **S6** in good yield. A solution of compound **S6** (2.5 mmol) in THF (15.0 mL) was stirred at 0 °C in an ice bath under Ar. Then t-BuOK (0.3 eq.)

was added dropwise, and the resulting mixture was warmed to room temperature and stirred overnight. The solvent was removed under vacuum and the residue was purified by a flash column chromatography on silica gel (PE/EA = 30/1) to afford the product **2t**.

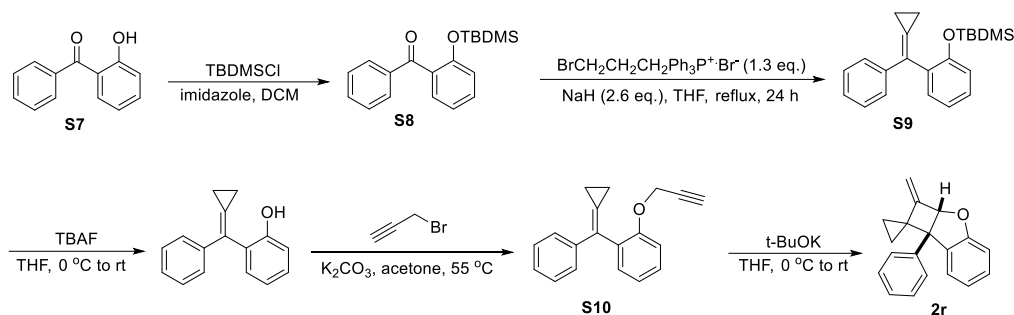

**S7** (10.0 mmol) was dissolved in DCM (30 mL) and then cooled to 0 °C, to which was added imidazole (12.0 mmol) and the corresponding TBDMSCl (12 mmol). Then, the reaction mixture was stirred at room temperature until the reaction was complete upon monitored by TLC analysis. Then, the reaction mixture was extracted by DCM/H<sub>2</sub>O and the organic phase was dried over MgSO<sub>4</sub>. The solvent was removed under vacuum and the residue was purified by a flash column chromatography on silica gel (PE/EA = 30/1) to afford the product **S8** in good yield. A solution of 3-bromopropyltriphenylphosphonium bromide (4.83 g, 10.4 mmol) and NaH (0.50 g, 20.8 mmol) in THF (15 mL) was stirred at 65 °C in an oil bath under Ar for 12 h. Afterwards compound **S8** (8 mmol) in THF (10 mL) was added and the reaction solution was stirred at 65 °C in an oil bath for another 12 h. Upon completion, the reaction mixture was cooled to room temperature and the mixture was filtered through a celite. The filtrate was concentrated under reduced pressure and the residue was purified by a silica gel flash chromatography (PE/EA = 30/1) to afford the product **S9** in moderate yield.

A solution of **S9** (5.0 mmol) in THF (15 mL) was stirred at 0 °C. TBAF (6.0 mmol, 1.90 g) dissolved in THF (5 mL) was added to the mixture. Then, the resulting solution was stirred at room temperature until TLC analysis showed the complete consumption of substrate (about 0.5 h). Aqueous saturated NH<sub>4</sub>Cl was added to neutralize TBAF. Next, the resulting mixture was extracted by EtOAc/H<sub>2</sub>O and the organic phase was dried over MgSO<sub>4</sub> and concentrated under reduced pressure. The crude product was used in the next step without further purification. A solution of the

above crude product (5.0 mmol) and  $K_2CO_3$  (10.0 mmol) in acetone (15.0 mL) was stirred at 55 °C, then, propargyl bromide (5.0 mmol) was added dropwise. Upon completion, the mixture is cooled and filtered through a celite, and then the solvent was removed under vacuum and the residue was purified by a flash column chromatography on silica gel (PE/EA = 10/1) to afford the product **S10** in good yield.

A solution of compound **S10** (4.0 mmol) in THF (20.0 mL) was stirred at 0 °C in an ice bath under Ar. Then t-BuOK (0.3 eq.) was added dropwise, and the resulting mixture was warmed to room temperature and stirred overnight. The solvent was removed under vacuum and the residue was purified by a flash column chromatography on silica gel (PE/EA = 30/1) to afford the product **2r**.

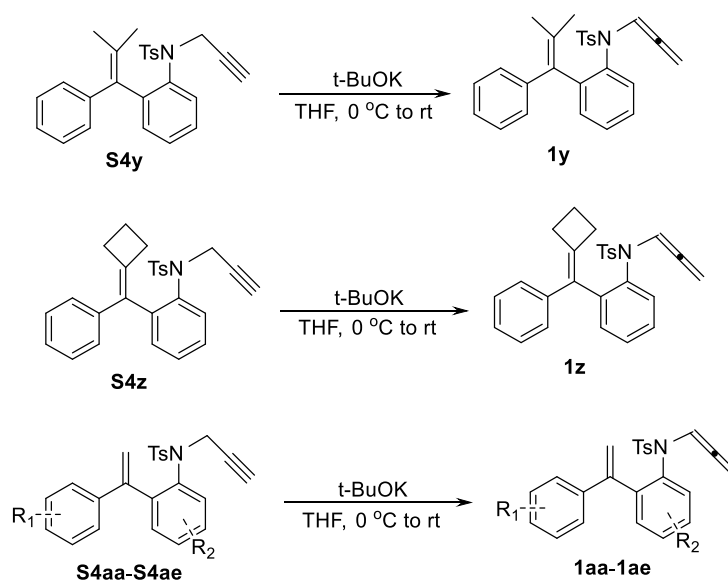

Compounds **S4y-S4ae** were prepared according to the previously reported literature.<sup>[1][2]</sup>

A solution of compound **S4** (4.0 mmol) in THF (20.0 mL) was stirred at 0 °C in an ice bath under Ar. Then t-BuOK (0.3 eq.) was added dropwise, the resulting mixture was warmed to room temperature and stirred overnight. The solvent was removed under vacuum and the residue was purified by a flash column chromatography on silica gel (PE/EA = 30/1) to afford the products **1y-1ae** in good yields.

### 3. General Procedure for the Synthesis of Products

#### 3.1 Method

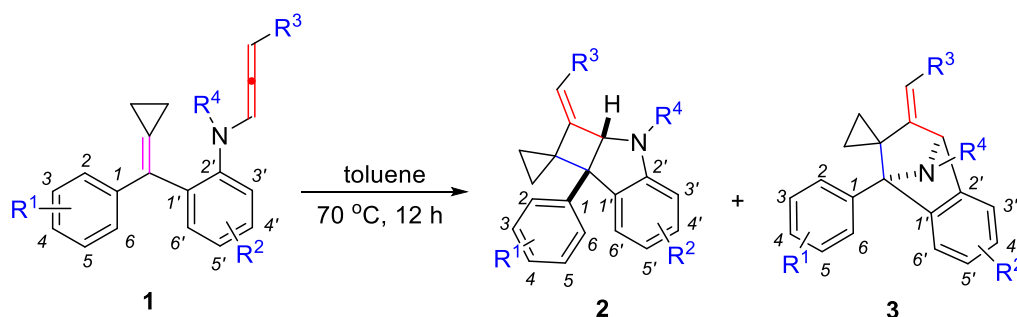

A 10 mL flame-vacuum dried screwed-tube equipped with a magnetic stirring bar was charged with **1** (0.2 mmol) and toluene (2.0 mL) under argon atmosphere. The reaction mixture was stirred at 70 °C for 12 hours in a pre-heated oil bath. After the reaction was finished up, the reaction mixture was cooled to ambient temperature. Then, organic solvent was removed under reduced pressure and the resulting residue was purified through a silica-gel column chromatography (eluent: petroleum ether / ethyl acetate = 20 / 1) to provide the desired products **2** and **3**.

#### 3.2 Reaction Setup

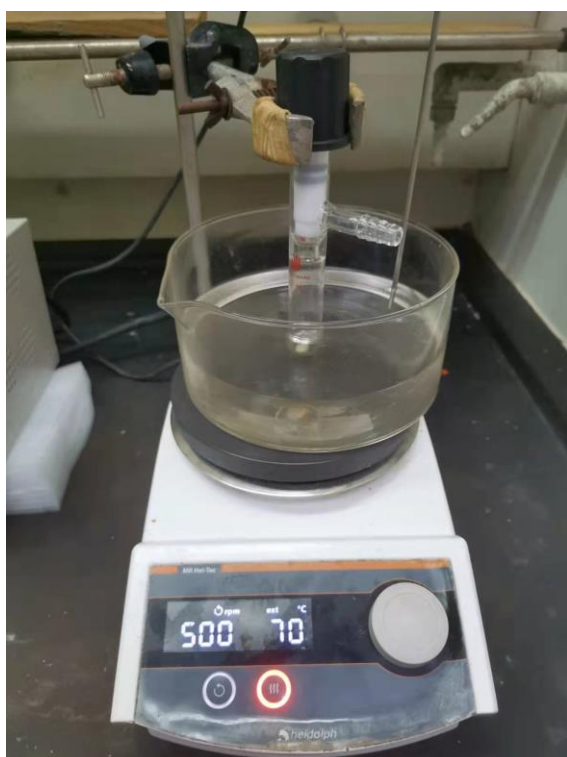

## 4. Mechanistic Investigations

### 4.1 Computational Methods, Coordinates and Energies

#### 4.1.1 Computational Details

All DFT calculations were performed with Gaussian 16 program.<sup>2</sup> The geometries of all minima and transition states have been optimized at M06-2X/6-31G(d) level of theory. The subsequent frequency calculations on the stationary points were carried out at the same level of theory to ascertain the nature of the stationary points as minima or first-order saddle points on the respective potential energy surfaces. All transition states were characterized by one and only one imaginary frequency pertaining to the desired reaction coordinate. Thermochemical corrections to 298.15 K have been calculated for all minima from unscaled vibrational frequencies obtained at this same level. The solvent effect was estimated by the IEFPCM method with radii and nonelectrostatic terms for SMD salvation model in toluene. Solution-phase single point energy calculations were performed at M06-2X/6-311+G(d,p) level based on the gas phase optimized structures. The possible conformers for each species were searched manually, and the best conformer was used to calculate the reaction energy profile.

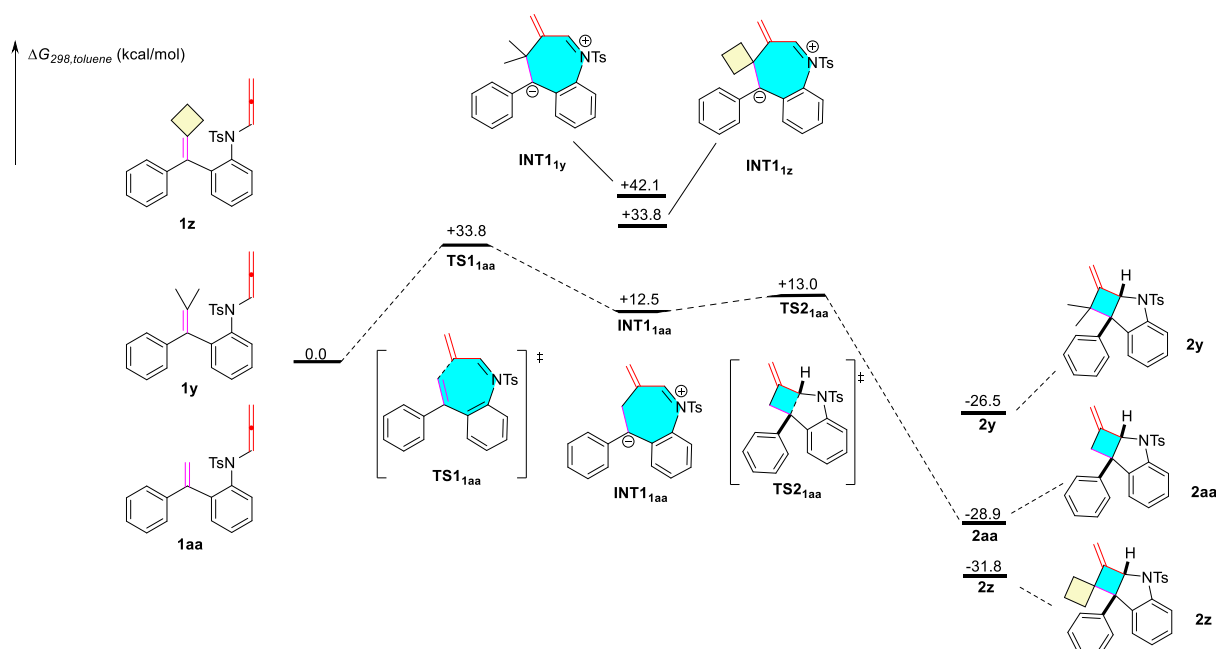

**Figure S1.** A theoretical investigation of controlling experiment.



## 4.1.2 Computational Coordinates and Energies

**Table S1.** The total energies, enthalpies and free energies of all species in toluene shown in Figure

2.<sup>a</sup>

|                            | $E_{\text{tot}} (E_{\text{h}})$ | $H_{298, \text{toluene}}$ | $G_{298, \text{toluene}}$ |
|----------------------------|---------------------------------|---------------------------|---------------------------|
| <b>1z</b>                  | -1646.578439                    | -1646.093821              | -1646.184002              |
| <b>INT1<sub>1z</sub></b>   | -1646.5354                      | -1646.051041              | -1646.133925              |
| <b>1y</b>                  | -1608.522401                    | -1608.04453               | -1608.132282              |
| <b>INT1<sub>1y</sub></b>   | -1608.463913                    | -1607.986518              | -1608.068854              |
| <b>1aa</b>                 | -1529.930774                    | -1529.51291               | -1529.594758              |
| <b>1a</b>                  | -1607.275455                    | -1606.821684              | -1606.90827               |
| <b>TS1<sub>1a</sub></b>    | -1607.236099                    | -1606.783385              | -1606.863961              |
| <b>INT1<sub>1a</sub></b>   | -1607.278374                    | -1606.823086              | -1606.907788              |
| <b>TS2<sub>1a</sub></b>    | -1607.278659                    | -1606.824349              | -1606.905036              |
| <b>TS2<sub>side</sub></b>  | -1607.257441                    | -1606.804766              | -1606.886718              |
| <b>INT2<sub>side</sub></b> | -1607.301566                    | -1606.845464              | -1606.930079              |
| <b>TS3<sub>side</sub></b>  | -1607.27272                     | -1606.818253              | -1606.89954               |
| <b>3a</b>                  | -1607.349241                    | -1606.892392              | -1606.971376              |
| <b>2a</b>                  | -1607.349946                    | -1606.893707              | -1606.972791              |
| <b>2y</b>                  | -1608.577404                    | -1608.097457              | -1608.178651              |
| <b>2z</b>                  | -1646.64499                     | -1646.158041              | -1646.238875              |
| <b>2aa</b>                 | -1529.989761                    | -1529.569503              | -1529.644429              |
| <b>Ts1<sub>1a-1</sub></b>  | -1607.178639                    | -1606.727859              | -1606.809615              |
| <b>1r</b>                  | -808.396784                     | -808.085293               | -808.149477               |
| <b>TS1<sub>1r</sub></b>    | -808.368097                     | -808.057674               | -808.117583               |
| <b>INT1<sub>1r</sub></b>   | -808.397725                     | -808.084998               | -808.143609               |
| <b>TS2<sub>1r</sub></b>    | -808.396297                     | -808.084608               | -808.142158               |
| <b>2r</b>                  | -808.462397                     | -808.148637               | -808.208052               |
| <b>TS1<sub>1aa</sub></b>   | -1529.879407                    | -1529.463043              | -1529.542326              |

|                           |              |              |              |
|---------------------------|--------------|--------------|--------------|
| <b>INT1<sub>1aa</sub></b> | -1529.918867 | -1529.499383 | -1529.577414 |
| <b>TS2<sub>1aa</sub></b>  | -1529.918824 | -1529.500335 | -1529.57664  |

Calculated at SMD(toluene)/M06-2X/6-311+G(d,p)//M06-2X/6-31G(d)

**1z**

Opt @ M06-2X/6-31G(d)

SCF Done: E(M062X) = -1646.578439a.u.

Zero-point correction = 0.455579 Hartree/Particle

Sum of electronic and thermal Free Energies = -1646.184002a.u.

-----  
C, 5.35557200, 1.48127100, -0.97670600  
C, 6.00721200, 0.37867200, -0.43133900  
C, 5.25861400, -0.68014300, 0.07968600  
C, 3.86896700, -0.63189300, 0.05169000  
C, 3.20183100, 0.48336200, -0.47199500  
C, 3.96410400, 1.53099300, -0.99924100  
C, 1.71077900, 0.52750100, -0.46689600  
C, 1.01880300, -0.64147800, -1.08592100  
C, 1.43612900, -1.02986000, -2.36605300  
C, 0.88147800, -2.12028900, -3.02158400  
C, -0.08415400, -2.88586700, -2.37591500  
C, -0.48917200, -2.55150500, -1.08880300  
C, 0.02759500, -1.41725300, -0.45147700  
C, 1.05903400, 1.57292900, 0.05035400  
C, 1.48607200, 2.89460700, 0.66431300  
C, 0.07043500, 3.42852700, 0.31805100  
C, -0.39509700, 1.95965900, 0.15251400  
N, -0.34524500, -1.06727900, 0.89874000  
H, 5.93087000, 2.30205700, -1.39455200  
H, 7.09194900, 0.33908000, -0.41361200  
H, 5.75912500, -1.54806900, 0.49837200  
H, 3.28355600, -1.46011300, 0.44308800  
H, 3.45591200, 2.37950600, -1.44813100  
H, 2.21684500, -0.44652100, -2.84666100  
H, 1.21561200, -2.38176100, -4.02060400  
H, -0.50534200, -3.76274200, -2.85770800  
H, -1.20097600, -3.17651100, -0.56219200  
H, 2.35363800, 3.41893800, 0.26064400  
H, 1.61481600, 2.78179300, 1.74854400  
H, -0.43636000, 4.03350400, 1.07249800  
H, 0.07003200, 3.96218700, -0.63533800  
H, -1.06537600, 1.69410400, -0.67154400  
H, -0.81302600, 1.57207400, 1.08853700  
S, -1.93194500, -1.31965200, 1.46334900  
O, -1.93907700, -0.76737700, 2.80694900  
O, -2.35271300, -2.70009600, 1.24882000  
C, -2.91936900, -0.27242300, 0.42131500  
C, -3.39611300, 0.91688900, 0.96440700

C, -3.25228800, -0.65905700, -0.87428500  
 C, -4.18314100, 1.74971000, 0.17849300  
 H, -3.14853400, 1.17226300, 1.98951800  
 C, -4.03027700, 0.19348500, -1.64885900  
 H, -2.91782100, -1.61172400, -1.26849500  
 C, -4.49842700, 1.40874100, -1.13987500  
 H, -4.56232500, 2.67847000, 0.59572600  
 H, -4.28990200, -0.09587300, -2.66344500  
 C, -5.31802300, 2.33491400, -2.00002900  
 H, -5.93511400, 1.77593100, -2.70827900  
 H, -5.97408400, 2.96352700, -1.39274600  
 H, -4.66707100, 2.99788200, -2.58060900  
 C, 0.64984500, -1.44459900, 1.87324900  
 H, 0.84079700, -2.51005500, 1.99992800  
 C, 1.31995000, -0.54473200, 2.54627900  
 C, 2.02889300, 0.32600200, 3.20700500  
 H, 1.71379700, 0.68854000, 4.18121800  
 H, 2.95563400, 0.70969800, 2.78465700

**INT1<sub>1z</sub>**

Opt @ M06-2X/6-31G(d)

SCF Done: E(M062X) = -1646.535400a.u.

Zero-point correction = 0.457060Hartree/Particle

Sum of electronic and thermal Free Energies = -1646.133925a.u.

-----

S, 0.29125400, -2.24382500, -1.33518800  
 O, 0.23346500, -2.13600700, -2.78150000  
 O, 0.23329400, -3.52973400, -0.66636200  
 N, -1.07622800, -1.31950500, -0.76797700  
 C, -1.36974600, -1.42005100, 0.65577900  
 C, -1.74982700, -2.61756000, 1.25313800  
 C, -1.86428700, -2.64140200, 2.64095600  
 C, -1.60863400, -1.49118700, 3.38975200  
 C, -1.27662600, -0.29215700, 2.76370200  
 C, -1.16691000, -0.24287100, 1.36974100  
 C, -1.02283000, 0.94580200, 0.50071300  
 C, -1.88765800, -0.77406400, -1.70767800  
 C, -2.63299400, 0.39933900, -1.48825100  
 C, -3.67363500, 0.71653400, -2.30254300  
 C, 0.18850700, 1.68632100, 0.40868400  
 C, 0.44826700, 2.55901100, -0.68370100  
 C, 1.60695800, 3.32105400, -0.74076000  
 C, 2.56035700, 3.24793600, 0.27418700  
 C, 2.34907400, 2.35822500, 1.33342400

C,1.21005300,1.57759500,1.39108400  
 C,1.68423700,-1.35372600,-0.73600600  
 C,2.20682800,-0.32252000,-1.51690600  
 C,3.36369700,0.30924300,-1.08820600  
 C,3.99315700,-0.06791200,0.10303900  
 C,3.42665000,-1.08318100,0.87686300  
 C,2.26778700,-1.73489600,0.46869200  
 C,5.25757100,0.62366300,0.53859600  
 H,-1.89819200,-3.50852900,0.65403600  
 H,-2.13713100,-3.56524700,3.14017400  
 H,-1.69241500,-1.52668600,4.47177600  
 H,-1.12764100,0.61417700,3.34438400  
 H,-1.78987900,-1.17929200,-2.70786400  
 H,-4.10583200,-0.01821600,-2.97318500  
 H,-4.12650700,1.70080100,-2.30456500  
 H,-0.26939200,2.61666000,-1.49656700  
 H,1.76707400,3.98123800,-1.58901100  
 H,3.45324900,3.86495500,0.23996400  
 H,3.09571600,2.26666900,2.11906400  
 H,1.08013700,0.87966100,2.21283000  
 H,1.72562800,-0.04814200,-2.44973600  
 H,3.77963500,1.12107300,-1.67774000  
 H,3.90067800,-1.37168700,1.81092800  
 H,1.83354600,-2.54160900,1.05059800  
 H,5.19533500,1.69797100,0.34179300

**1y**

Opt @ M06-2X/6-31G(d)

SCF Done: E(M062X) = -1608.522401a.u.

Zero-point correction = 0.448850Hartree/Particle

Sum of electronic and thermal Free Energies = -1608.132282a.u.

-----

C,2.50651100,-0.83773000,-0.48742200  
 C,2.40632000,-2.13090900,0.04127900  
 C,2.15402100,-3.22056500,-0.78371400  
 C,1.97756700,-3.03533800,-2.15189600  
 C,2.04375500,-1.75224600,-2.68649900  
 C,2.30287100,-0.66284200,-1.86170200  
 C,1.99357600,1.57220200,0.05146700  
 C,0.59191900,1.57542600,-0.02236400  
 C,2.66343000,2.76224200,-0.25922800  
 C,-0.10410200,2.72874900,-0.37983800  
 C,1.97430800,3.90970500,-0.63339600  
 C,0.58295600,3.89281300,-0.69729100

C, 2.76998100, 0.34020000, 0.38679800  
C, 3.67272400, 0.34314100, 1.39099400  
N, -0.14187200, 0.39582000, 0.32100100  
S, -1.03228300, -0.41564100, -0.86619800  
O, -0.83754600, 0.34445400, -2.08696200  
O, -0.73408600, -1.83016800, -0.77808500  
C, -2.71730700, -0.19355800, -0.34119600  
C, -3.43651200, 0.89855800, -0.81938200  
C, -3.29047700, -1.11261300, 0.53145400  
C, -4.74562500, 1.08050100, -0.39164500  
C, -4.60094100, -0.91012500, 0.95168900  
C, -5.34319700, 0.18438300, 0.50101100  
C, -6.77404800, 0.37456300, 0.93351100  
C, 0.04621300, -0.16367700, 1.60538100  
C, -0.24358600, -1.37128500, 2.02624700  
C, -0.50446200, -2.54251500, 2.53905000  
H, 2.49976900, -2.27142300, 1.11443000  
H, 2.07174000, -4.21413000, -0.35314900  
H, 1.76612300, -3.88420800, -2.79473100  
H, 1.88110400, -1.59363100, -3.74794800  
H, 2.33544100, 0.33819300, -2.28332900  
H, 3.74917500, 2.76452000, -0.22144000  
H, -1.18879200, 2.69847300, -0.39676700  
H, 2.52241500, 4.81364600, -0.87974400  
H, 0.03428100, 4.78408000, -0.98399100  
H, -2.97637800, 1.57428400, -1.53386500  
H, -2.71718000, -1.97496500, 0.85556900  
H, -5.31864700, 1.92640600, -0.76192700  
H, -5.05953700, -1.61941100, 1.63555200  
H, -7.45863500, -0.10168200, 0.22294600  
H, -6.95422700, -0.07038100, 1.91540800  
H, -7.03566600, 1.43482100, 0.98307300  
H, 0.47120100, 0.55259900, 2.30467300  
H, -1.47094700, -2.77315300, 2.98370600  
H, 0.23130400, -3.34384200, 2.51800100  
C, 3.82592300, 1.48643100, 2.36406900  
C, 4.63911300, -0.78266000, 1.66115300  
H, 4.77212400, 2.01849100, 2.20187600  
H, 3.01324600, 2.21216000, 2.30773000  
H, 3.86659900, 1.08895800, 3.38590500  
H, 5.62687100, -0.36206000, 1.88534000  
H, 4.33945800, -1.36080800, 2.54466100  
H, 4.73626100, -1.46880500, 0.81935600  
H, 6.12329200, 0.23387800, -0.00817300

H, 5.44349400, 0.47826600, 1.60591000  
C, -2.27137300, 1.29116300, -0.22426100  
C, -3.54832100, 1.27128800, 0.71002000  
C, -2.57536000, 2.80009800, -0.50269300  
C, -3.94463900, 2.66996400, 0.19363100  
H, -3.27626500, 1.27484900, 1.76727000  
H, -4.24965700, 0.45586500, 0.51898600  
H, -1.88338500, 3.44631200, 0.04085100  
H, -2.58335300, 3.10940200, -1.55155900  
H, -4.14832000, 3.41057600, 0.96999400  
H, -4.79216000, 2.65646900, -0.49438500

**INT1<sub>1y</sub>**

Opt @ M06-2X/6-31G(d)

SCF Done: E(M062X) = -1608.463913a.u.

Zero-point correction = 0.450134Hartree/Particle

Sum of electronic and thermal Free Energies = -1608.068854a.u.

-----  
S, -0.28973100, -2.05364200, -1.45345300  
O, -0.38011900, -1.78160600, -2.87578600  
O, -0.57080200, -3.37259600, -0.91489800  
N, -1.42233900, -0.95424500, -0.72238600  
C, -1.56827100, -1.04756200, 0.72369900  
C, -2.03990500, -2.18679900, 1.36907500  
C, -2.02779300, -2.18537300, 2.76112300  
C, -1.57308000, -1.06516500, 3.46199200  
C, -1.15344100, 0.07851500, 2.78850500  
C, -1.15793100, 0.10109900, 1.38867900  
C, -0.91547500, 1.23430200, 0.45831000  
C, -2.35662400, -0.38427000, -1.52143100  
C, -2.96936300, 0.82712900, -1.14848100  
C, -2.18013300, 1.79965700, -0.12589900  
C, -3.17865000, 2.02013000, 1.04506500  
C, -2.03718900, 3.15912600, -0.84117000  
C, -4.17846300, 1.19909400, -1.63318700  
C, 0.41853900, 1.75355500, 0.31402800  
C, 0.86775000, 2.48613800, -0.81792600  
C, 2.14881000, 3.01763500, -0.88779800  
C, 3.05837600, 2.83765600, 0.15156500  
C, 2.66744800, 2.06376400, 1.24685400  
C, 1.39897200, 1.51600000, 1.31691700  
C, 1.25817500, -1.50452500, -0.82701600  
C, 2.01270300, -0.61417700, -1.58885200  
C, 3.26496300, -0.24250500, -1.12257700

C, 3.75917700, -0.73485700, 0.08903000  
C, 2.96798600, -1.60880900, 0.83945800  
C, 1.71361900, -2.00446200, 0.39097300  
C, 5.12331800, -0.31903900, 0.57154600  
H, -2.35704300, -3.05298700, 0.79973800  
H, -2.36548600, -3.06346500, 3.30165500  
H, -1.57087200, -1.07867100, 4.54777600  
H, -0.85674300, 0.96557200, 3.34095400  
H, -2.45707300, -0.78703400, -2.52271300  
H, -3.42184000, 1.08823700, 1.55842100  
H, -2.75377600, 2.72131600, 1.77139800  
H, -1.34760300, 3.81281000, -0.29989200  
H, -1.69206400, 3.05826700, -1.87133800  
H, -4.82900900, 0.48855900, -2.13115300  
H, -4.55320400, 2.21138900, -1.52957700  
H, 0.21265100, 2.61261500, -1.66861200  
H, 2.43881000, 3.57630700, -1.77372700  
H, 4.05081900, 3.27577600, 0.10532300  
H, 3.36856600, 1.87658900, 2.05691900  
H, 1.14496700, 0.90201100, 2.17357800  
H, 1.62625100, -0.24378200, -2.53237900  
H, 3.86241900, 0.45939900, -1.69689500  
H, 3.34006500, -1.98703600, 1.78752400  
H, 1.10223300, -2.69968400, 0.95784000  
H, 5.30567900, 0.73575200, 0.34637800  
H, 5.90661000, -0.90623700, 0.07951700  
H, 5.22506000, -0.46446700, 1.65016300  
H, -4.11142700, 2.43501200, 0.65003400  
H, -3.00964100, 3.65781800, -0.87841300

**1aa**

Opt @ M06-2X/6-31G(d)

SCF Done: E(M062X) = -1529.930774a.u.

Zero-point correction = 0.391802Hartree/Particle

Sum of electronic and thermal Free Energies = -1529.594758a.u.

-----  
C, 2.86394600, -0.72547400, -0.04230200  
C, 2.87126900, -2.02307200, 0.48007500  
C, 2.77477200, -3.12341800, -0.36326800  
C, 2.66484000, -2.94180000, -1.73960900  
C, 2.64373500, -1.65436600, -2.26742200  
C, 2.73773000, -0.55221200, -1.42469700  
C, 2.22475000, 1.68052500, 0.50828300  
C, 0.83860100, 1.63601100, 0.28752100



C, 2.87149300, 2.91516600, 0.39085700  
C, 0.13437200, 2.78894500, -0.05009200  
C, 2.17195600, 4.06531800, 0.04192800  
C, 0.80018800, 4.00088700, -0.18830300  
C, 2.99980100, 0.45478500, 0.85102400  
C, 3.81203700, 0.45192700, 1.91480500  
N, 0.12939800, 0.40896700, 0.48795400  
S, -0.60336100, -0.37621500, -0.81570100  
O, -0.30055100, 0.43827700, -1.97864500  
O, -0.27103500, -1.78437500, -0.74528400  
C, -2.34061100, -0.22205300, -0.46900800  
C, -3.04011500, 0.86684500, -0.98328300  
C, -2.97107400, -1.18690200, 0.30916600  
C, -4.39122800, 0.99643400, -0.68894700  
C, -4.32400200, -1.03625200, 0.59663400  
C, -5.04947200, 0.05228600, 0.10688100  
C, -6.52222000, 0.19040100, 0.39382500  
C, 0.18596200, -0.19496800, 1.76633100  
C, -0.07309000, -1.43672900, 2.09815900  
C, -0.32144600, -2.64362800, 2.52674400  
H, 2.92372900, -2.15867400, 1.55724300  
H, 2.76883900, -4.12531500, 0.05573400  
H, 2.57671200, -3.80144500, -2.39666100  
H, 2.53789300, -1.50374600, -3.33709800  
H, 2.70139200, 0.45181600, -1.83866800  
H, 3.94504100, 2.95157300, 0.55000300  
H, -0.94030600, 2.72281000, -0.18690900  
H, 2.69885100, 5.00904400, -0.05737000  
H, 0.24651100, 4.89350800, -0.46085200  
H, 4.43324000, -0.40766900, 2.14646600  
H, 3.87824900, 1.31090800, 2.57597600  
H, -2.52926100, 1.58083400, -1.62213400  
H, -2.40719000, -2.04367600, 0.66351500  
H, -4.94952700, 1.83876600, -1.08886400  
H, -4.82811600, -1.78178400, 1.20564100  
H, -7.11639900, -0.20727200, -0.43626900  
H, -6.80411100, -0.35759600, 1.29628500  
H, -6.80302100, 1.23877300, 0.52636000  
H, 0.47299700, 0.51169200, 2.54099700  
H, -1.31965300, -2.95137500, 2.83278000  
H, 0.46165000, -3.39766100, 2.56898100

1a

Opt @ M06-2X/6-31G(d)

SCF Done: E(M062X) = -1607.275455a.u.

Zero-point correction = 0.425599Hartree/Particle

Sum of electronic and thermal Free Energies = -1606.908270a.u.

-----  
C,2.50394800,-0.84453900,-0.51533300  
C,2.56819400,-2.12275800,0.04905800  
C,2.34309200,-3.24968200,-0.73192800  
C,2.05070800,-3.11553000,-2.08731200  
C,1.97834600,-1.84780000,-2.65573200  
C,2.19994900,-0.71837500,-1.87488400  
H,2.77468700,-2.22034100,1.11103900  
H,2.38274200,-4.23616500,-0.27930300  
H,1.86388800,-3.99635000,-2.69380300  
H,1.73264900,-1.73286900,-3.70675100  
H,2.12125600,0.27066300,-2.31803300  
C,1.99405200,1.60739000,-0.00609600  
C,0.59125700,1.60210000,-0.06577000  
C,2.66011100,2.81162000,-0.25261900  
C,-0.11264900,2.76125800,-0.38298200  
C,1.96028600,3.96755200,-0.57994400  
H,3.74497300,2.81877100,-0.20744100  
C,0.56961900,3.94048300,-0.65566900  
H,-1.19739100,2.72661100,-0.39671700  
H,2.49986600,4.88745500,-0.78204000  
H,0.01611900,4.83843600,-0.91054400  
C,2.75751200,0.36651300,0.30706300  
C,3.65064800,0.38095600,1.29257500  
C,4.67010600,-0.32212600,2.07087500  
C,4.30568600,1.13616000,2.36219100  
H,5.63158400,-0.52544300,1.60529400  
H,4.35613700,-1.07098300,2.79405200  
H,3.74726500,1.34684900,3.27159000  
H,5.03280300,1.90041200,2.09883700  
N,-0.12471100,0.41198300,0.28243000  
S,-1.02714400,-0.41675600,-0.87999800  
O,-0.85857400,0.33546700,-2.11022800  
O,-0.71577000,-1.82818400,-0.78322100  
C,-2.70420900,-0.20406000,-0.32740900  
C,-3.43973300,0.88022800,-0.79875400  
C,-3.25306300,-1.12004200,0.56368100  
C,-4.74136800,1.05621100,-0.34682000  
H,-2.99759800,1.55441000,-1.52600400  
C,-4.55653600,-0.92334500,1.00822200

H,-2.66710400,-1.97588000,0.88273000  
C,-5.31506800,0.16243300,0.56392100  
H,-5.32749400,1.89553800,-0.71161600  
H,-4.99655700,-1.63029900,1.70649900  
C,-6.73843000,0.34712200,1.02278700  
H,-6.99592600,1.40691000,1.09877300  
H,-7.43549900,-0.11169100,0.31290900  
H,-6.90462100,-0.11787400,1.99775800  
C,0.07923500,-0.13344600,1.57196300  
C,-0.15519500,-1.35283300,1.99338900  
C,-0.36963500,-2.53242100,2.50801200  
H,-1.32871600,-2.80307600,2.94589200  
H,0.39982800,-3.30131200,2.49215400  
H,0.46796400,0.60376600,2.27038000

**TS1<sub>1a</sub>**

Opt @ M06-2X/6-31G(d)

SCF Done: E(M062X) = -1607.236099a.u.

Zero-point correction = 0.426391Hartree/Particle

Sum of electronic and thermal Free Energies = -1606.863961a.u.

-----  
C,-1.99551200,0.38310800,0.60591900  
C,-3.09367200,0.00539400,1.39580400  
C,-3.07315000,0.16444800,2.77214300  
C,-1.95760800,0.72478100,3.39377600  
C,-0.90197400,1.17352700,2.61600800  
C,-0.90853800,1.04405200,1.21868900  
C,0.08511400,1.77797100,0.42152400  
C,-1.44504000,0.54808200,-1.91749900  
C,-0.41970900,1.39476800,-2.07793300  
C,-0.46524500,2.64163500,-0.49279800  
C,-1.65947500,3.50580200,-0.48492600  
C,-0.31338500,4.03102900,-0.96869800  
C,0.60410200,1.68920000,-2.87925300  
C,1.51531900,1.51610900,0.51119600  
C,2.42884900,2.22594500,-0.29018900  
C,3.79034700,1.94531200,-0.23534700  
C,4.27371500,0.96442000,0.62582000  
C,3.37844900,0.25054000,1.42396400  
C,2.01776100,0.50921000,1.35617000  
H,-3.95566400,-0.43245300,0.91010100  
H,-3.93401600,-0.14175100,3.35733400  
H,-1.93333400,0.85451600,4.47112200  
H,-0.06225900,1.68784100,3.07565300

H,-1.92390300,0.18505100,-2.82050500  
 H,-2.41944600,3.34731600,-1.24391400  
 H,-2.03607000,3.83132700,0.48141900  
 H,0.24024500,4.71498200,-0.33052200  
 H,-0.21647000,4.22987300,-2.03240000  
 H,1.21639700,0.89236900,-3.29310000  
 H,0.91041900,2.70623200,-3.10269400  
 H,2.06641000,3.00996000,-0.94416400  
 H,4.47788300,2.50531900,-0.86201900  
 H,5.33865900,0.75839500,0.67878000  
 H,3.74326000,-0.52271700,2.09467400  
 H,1.32794100,-0.08187000,1.94985900  
 N,-2.05363400,-0.02361700,-0.76616800  
 S,-2.02175300,-1.75832900,-0.95672200  
 O,-2.88210500,-2.35588100,0.04310900  
 O,-2.24618000,-2.00678400,-2.36875600  
 C,-0.33893000,-2.13834800,-0.55110200  
 C,-0.03531600,-2.58557600,0.72995800  
 C,0.65187900,-1.93975600,-1.51226700  
 C,1.29269200,-2.86580900,1.04035600  
 H,-0.83101600,-2.72235000,1.45570100  
 C,1.97046900,-2.20539600,-1.17426800  
 H,0.38251200,-1.60022300,-2.50751400  
 C,2.30718400,-2.68128500,0.09861800  
 H,1.54436000,-3.23086400,2.03254600  
 H,2.75495800,-2.04920600,-1.90980100  
 C,3.74309400,-2.99644700,0.42500500  
 H,3.87779700,-3.18456800,1.49334100  
 H,4.07706900,-3.88706600,-0.11800600  
 H,4.39551000,-2.16649300,0.13598900

**INT1<sub>1a</sub>**

Opt @ M06-2X/6-31G(d)

SCF Done: E(M062X) = -1607.278374a.u.

Zero-point correction = 0.428685Hartree/Particle

Sum of electronic and thermal Free Energies = -1606.907788a.u.

-----  
 S,2.36548100,-1.21977400,-1.24343900  
 O,2.20105200,-1.49086000,-2.65728100  
 O,3.47891300,-1.77599300,-0.50852900  
 N,0.84210400,-1.76443900,-0.45725100  
 C,0.78446700,-1.37903000,0.89986500  
 C,1.84979700,-1.68980100,1.76963900  
 C,1.97425700,-1.01659800,2.96706500

C, 1.04307400, -0.02214900, 3.32053000  
C, -0.05163700, 0.21738900, 2.51951100  
C, -0.26908600, -0.50921400, 1.32245500  
C, -1.49959600, -0.52934200, 0.60725600  
C, -0.18159600, -1.82981000, -1.34537800  
C, -1.56787300, -2.11718900, -1.13779200  
C, -1.98584000, -1.90744900, 0.26760500  
C, -1.88150200, -3.03032300, 1.26578500  
C, -3.22816300, -2.51301000, 0.85169300  
C, -2.40176000, -2.28812200, -2.18845500  
C, -2.29681000, 0.63046700, 0.28405200  
C, -3.57516300, 0.49652600, -0.30178900  
C, -4.31978400, 1.61460400, -0.66372800  
C, -3.82839800, 2.89784600, -0.44893300  
C, -2.55945900, 3.05111200, 0.11745500  
C, -1.80138400, 1.94559100, 0.46235900  
C, 2.20969500, 0.51017600, -0.92159400  
C, 1.28369100, 1.23568600, -1.66928400  
C, 1.06442100, 2.56511700, -1.33960200  
C, 1.75369500, 3.16673200, -0.27952100  
C, 2.67137700, 2.40712900, 0.45115100  
C, 2.90716300, 1.07223800, 0.14123600  
C, 1.51139400, 4.61510800, 0.05377200  
H, 2.57348300, -2.44164000, 1.48514300  
H, 2.78999400, -1.26437100, 3.63821000  
H, 1.14787100, 0.50784700, 4.26226500  
H, -0.83232700, 0.89768800, 2.84702800  
H, 0.15844300, -1.82709500, -2.37547200  
H, -1.57278800, -4.00128800, 0.89191700  
H, -1.51846400, -2.78035800, 2.25788900  
H, -3.77763800, -1.90741100, 1.56499600  
H, -3.84588600, -3.13704300, 0.21233100  
H, -2.04675300, -2.23413100, -3.21262900  
H, -3.45776800, -2.47583900, -2.03308300  
H, -3.98492500, -0.49288300, -0.46674200  
H, -5.30007200, 1.47778700, -1.11117800  
H, -4.41867000, 3.76727100, -0.72005800  
H, -2.15696400, 4.04761900, 0.28063700  
H, -0.79766200, 2.08457800, 0.85323000  
H, 0.74360200, 0.76582700, -2.48512500  
H, 0.33277100, 3.14110000, -1.89902100  
H, 3.20070500, 2.86243500, 1.28314100  
H, 3.60016700, 0.46838800, 0.71721200  
H, 0.45261100, 4.86889800, -0.04883400

H,2.07263500,5.26565000,-0.62582000  
H,1.82560200,4.84715200,1.07409800

**TS2<sub>1a</sub>**

Opt @ M06-2X/6-31G(d)

SCF Done: E(M062X) = -1607.278659a.u.

Zero-point correction = 0.428542Hartree/Particle

Sum of electronic and thermal Free Energies = -1606.905036a.u.

-----  
S,2.34444700,-1.15584400,-1.30625900  
O,2.14590300,-1.41122200,-2.71864800  
O,3.48928100,-1.69342100,-0.60547000  
N,0.87076000,-1.75647900,-0.48728800  
C,0.84164800,-1.38949200,0.87741200  
C,1.91693000,-1.70004300,1.72947000  
C,2.03513700,-1.04851300,2.94190200  
C,1.08928800,-0.08165100,3.32246900  
C,-0.01238200,0.16158500,2.52761500  
C,-0.21397900,-0.53580900,1.31495800  
C,-1.43999700,-0.55599400,0.58131500  
C,-0.19961200,-1.78219700,-1.33068000  
C,-1.55992200,-2.18261700,-1.09709500  
C,-1.95536600,-1.94329700,0.30712500  
C,-1.85178900,-3.03293700,1.34141700  
C,-3.19623200,-2.50658800,0.93363400  
C,-2.39650500,-2.42163100,-2.12855900  
C,-2.24128400,0.60504800,0.26885100  
C,-3.51860100,0.47341900,-0.31875400  
C,-4.25648900,1.59361700,-0.68620400  
C,-3.75889900,2.87583600,-0.47513200  
C,-2.49399400,3.02620300,0.09952200  
C,-1.74517800,1.91714100,0.45590900  
C,2.16198700,0.56689500,-0.95814800  
C,1.21158700,1.28670600,-1.67668400  
C,0.96248400,2.60362500,-1.31141400  
C,1.63632200,3.19069400,-0.23609900  
C,2.59266300,2.44062400,0.45730800  
C,2.86135900,1.12341700,0.10864700  
C,1.29079300,4.58467300,0.21760100  
H,2.65407800,-2.42909200,1.42076400  
H,2.86168300,-1.29233600,3.60126600  
H,1.18849200,0.42715300,4.27639000  
H,-0.80100100,0.82531800,2.87014500  
H,0.09598600,-1.71211400,-2.37254400

H, -1.56620600, -4.02079300, 0.99456600  
H, -1.46671600, -2.75690000, 2.31833300  
H, -3.72155900, -1.86579200, 1.63445400  
H, -3.83710800, -3.14028800, 0.32738300  
H, -2.05581800, -2.38175300, -3.15816400  
H, -3.44161800, -2.65068600, -1.95439400  
H, -3.92812300, -0.51534800, -0.48933100  
H, -5.23471000, 1.46020500, -1.13914200  
H, -4.34253700, 3.74667200, -0.75599000  
H, -2.08495400, 4.02135100, 0.25646900  
H, -0.74481700, 2.04985800, 0.85772400  
H, 0.68032100, 0.82763900, -2.50428500  
H, 0.21508200, 3.17565700, -1.85310000  
H, 3.12516300, 2.89149100, 1.29019900  
H, 3.58501400, 0.52626400, 0.65311400  
H, 0.98714600, 5.21426900, -0.62188300  
H, 2.13110400, 5.06168200, 0.72788100  
H, 0.45333500, 4.55124800, 0.92594600

**TS2<sub>side</sub>**

Opt @ M06-2X/6-31G(d)

SCF Done: E(M062X) = -1607.257441a.u.

Zero-point correction = 0.427244Hartree/Particle

Sum of electronic and thermal Free Energies = -1606.886718a.u.

-----  
S, 1.62000800, -1.01723300, -0.94494000  
O, 1.16828700, -0.33460100, -2.14613200  
O, 1.65395600, -2.46524900, -0.82593700  
N, 0.66233800, -0.48454700, 0.30763400  
C, 0.10852400, 0.77424700, 0.53689300  
C, 0.98479400, 1.85786100, 0.84965800  
C, 0.50590500, 3.11932900, 1.03814600  
C, -0.89806300, 3.36824300, 0.96517800  
C, -1.76208700, 2.36132500, 0.67250300  
C, -1.32406100, 1.00613300, 0.40849300  
C, -2.25535000, 0.00239900, 0.14701300  
C, 0.23728200, -1.12832900, 1.47020100  
C, -1.04519000, -1.74497900, 1.46000200  
C, -1.87667700, -1.42979400, 0.22981900  
C, -2.76117700, -2.49327000, -0.36587600  
C, -1.47296600, -2.16730500, -1.04703500  
C, -1.56691500, -2.45808800, 2.48096000  
C, -3.66471300, 0.34237900, -0.14653700  
C, -4.70941700, -0.24491700, 0.58364100

C, -6.03401800, 0.06298700, 0.30138700  
 C, -6.34362100, 0.95315800, -0.72678300  
 C, -5.31798500, 1.53445300, -1.46686500  
 C, -3.98999200, 1.23288700, -1.17909100  
 C, 3.25004200, -0.41198900, -0.57016400  
 C, 3.84459400, 0.52711100, -1.40275400  
 C, 5.11129200, 1.00609600, -1.07776400  
 C, 5.77979400, 0.55938300, 0.06341600  
 C, 5.15280900, -0.38641100, 0.88498500  
 C, 3.89351900, -0.87996500, 0.57453100  
 C, 7.16344000, 1.05630700, 0.39340000  
 H, 2.04757600, 1.64345500, 0.91321900  
 H, 1.18894100, 3.93586700, 1.25083600  
 H, -1.27700800, 4.36414700, 1.17030700  
 H, -2.82804600, 2.55707200, 0.67183800  
 H, 0.74683000, -0.87641900, 2.39711400  
 H, -2.82260900, -3.43974200, 0.15990600  
 H, -3.68356100, -2.17576500, -0.83781300  
 H, -1.49540300, -1.58610000, -1.96353500  
 H, -0.65264300, -2.87109800, -0.96666600  
 H, -0.95797200, -2.77024300, 3.32368900  
 H, -2.60404700, -2.77621200, 2.46754400  
 H, -4.46350600, -0.93667300, 1.38501100  
 H, -6.82861700, -0.39117800, 0.88543800  
 H, -7.37943200, 1.18881800, -0.95015600  
 H, -5.55038800, 2.21986700, -2.27612400  
 H, -3.18807100, 1.67539200, -1.76365800  
 H, 3.31178800, 0.87464700, -2.28180800  
 H, 5.58679900, 1.74139200, -1.72114700  
 H, 5.66381200, -0.73967800, 1.77673100  
 H, 3.41001400, -1.62241000, 1.20333800  
 H, 7.28759900, 1.19830800, 1.47066000  
 H, 7.37500200, 2.00452200, -0.10605000  
 H, 7.91991400, 0.33289400, 0.06934900

**INT2<sub>side</sub>**

Opt @ M06-2X/6-31G(d)

SCF Done: E(M062X) = -1607.301566a.u.

Zero-point correction = 0.429605Hartree/Particle

Sum of electronic and thermal Free Energies = -1606.930079a.u.

-----  
 S, 2.09407500, 1.65090500, -0.46492900  
 O, 2.63648200, 2.55560000, 0.54687700  
 O, 1.85291200, 2.11652400, -1.81863400



N, 0.65851600, 0.93050100, 0.06190000  
C, -0.52269100, 1.74439600, 0.46005000  
C, -0.43604100, 3.22239200, 0.39137200  
C, -1.42480200, 3.93583600, -0.16406600  
C, -2.61672300, 3.29320100, -0.70078100  
C, -2.80304700, 1.96427900, -0.59211300  
C, -1.82745100, 1.10685800, 0.07058800  
C, -2.06020000, -0.20107400, 0.35124900  
C, 0.32266300, 1.01447900, 1.47760500  
C, -0.23522200, -0.21585800, 2.08365400  
C, -1.07429500, -1.01534000, 1.13959700  
C, -1.32617100, -2.47166200, 1.44062900  
C, -0.34540700, -2.11371300, 0.37536300  
C, -0.00940200, -0.51286300, 3.36295800  
C, -3.28075600, -0.88624500, -0.15422700  
C, -4.27196000, -1.33130600, 0.72850400  
C, -5.40846300, -1.97401300, 0.24981500  
C, -5.56696400, -2.18907000, -1.11847800  
C, -4.58529100, -1.75502000, -2.00442800  
C, -3.44917500, -1.10698800, -1.52501400  
C, 3.11429800, 0.19986000, -0.49818500  
C, 4.06356300, 0.01069400, 0.49649800  
C, 4.83708300, -1.14760000, 0.47175700  
C, 4.66670100, -2.10438000, -0.52930800  
C, 3.70000600, -1.88240200, -1.51994200  
C, 2.92149100, -0.73479800, -1.51418700  
C, 5.51320700, -3.35026900, -0.56622800  
H, 0.46153900, 3.69125900, 0.78223900  
H, -1.34520600, 5.01713600, -0.21695900  
H, -3.37157100, 3.91051600, -1.17696200  
H, -3.71112500, 1.50522400, -0.96760000  
H, 0.96454500, 1.64415900, 2.09291500  
H, -0.93775100, -2.85771100, 2.37614600  
H, -2.27488400, -2.89724100, 1.13619000  
H, -0.63789300, -2.25394200, -0.66081800  
H, 0.71648300, -2.21526200, 0.57735400  
H, 0.64004900, 0.10701600, 3.97380600  
H, -0.46646600, -1.37006300, 3.84540900  
H, -4.14399900, -1.16276400, 1.79459100  
H, -6.17367600, -2.30581300, 0.94491000  
H, -6.45338200, -2.69287400, -1.49110400  
H, -4.70208700, -1.91970900, -3.07118100  
H, -2.68156300, -0.75897200, -2.21142500  
H, 4.19283100, 0.76476400, 1.26588800

H, 5.58606000, -1.30837700, 1.24209800  
H, 3.56314700, -2.62128800, -2.30522400  
H, 2.17340800, -0.55254700, -2.27950200  
H, 4.89267000, -4.24385400, -0.68273300  
H, 6.10136600, -3.45914600, 0.34791500  
H, 6.20782900, -3.32183000, -1.41239900

**TS3<sub>side</sub>**

Opt @ M06-2X/6-31G(d)

SCF Done: E(M062X) = -1607.272720a.u.

Zero-point correction = 0.428822Hartree/Particle

Sum of electronic and thermal Free Energies = -1606.899540a.u.

-----  
S, -1.33952300, -1.93770200, -1.33141400  
O, -1.78535900, -3.20575600, -0.73022300  
O, -1.37141500, -1.77999000, -2.78338200  
N, 0.11040700, -1.48488400, -0.80269900  
C, 1.96529200, -1.92424100, 0.45704100  
C, 2.81767700, -3.00116000, 0.25545200  
C, 4.16970900, -2.77524300, 0.02081900  
C, 4.68544100, -1.47278200, -0.06626000  
C, 3.84512100, -0.38926000, 0.08766400  
C, 2.48248100, -0.60417300, 0.39949400  
C, 1.56382600, 0.47032900, 0.58978700  
C, 0.46503100, -2.01123100, 0.50980500  
C, -0.02527600, -1.11810400, 1.63355000  
C, 0.37232300, 0.29583500, 1.38436000  
C, 0.18066700, 1.37861300, 2.48810800  
C, -0.72808800, 1.37229400, 1.33935500  
C, -0.78668600, -1.54417300, 2.63824900  
C, 1.87007200, 1.78826600, -0.01447700  
C, 2.66040500, 2.75467200, 0.60912600  
C, 2.91057900, 3.96214400, -0.03981500  
C, 2.37765800, 4.19927700, -1.30326100  
C, 1.59662300, 3.22702000, -1.92681300  
C, 1.33988300, 2.01770700, -1.29035600  
C, -2.50031200, -0.70203900, -0.72304100  
C, -3.30585000, -0.97098500, 0.37998800  
C, -4.15307200, 0.01935500, 0.86968100  
C, -4.20967800, 1.28248100, 0.26917100  
C, -3.40104300, 1.52741900, -0.84501900  
C, -2.55268300, 0.54312200, -1.34371700  
C, -5.15415200, 2.33535400, 0.79204700  
H, 2.41581600, -4.00932400, 0.26035700

H, 4.83572100, -3.62097200, -0.12295000  
H, 5.73922100, -1.32076000, -0.27267400  
H, 4.22605400, 0.62316400, 0.00112500  
H, 0.12821800, -3.04222300, 0.67326500  
H, -0.13520400, 0.96805700, 3.44071900  
H, 0.93774900, 2.15191600, 2.54672200  
H, -0.62078300, 2.14653000, 0.58780000  
H, -1.72429700, 0.95540100, 1.45097700  
H, -1.08318300, -2.58745100, 2.69035500  
H, -1.17263500, -0.88868900, 3.41510900  
H, 3.08663300, 2.55955700, 1.58995500  
H, 3.52538400, 4.71415400, 0.44414200  
H, 2.57529900, 5.14053200, -1.80593900  
H, 1.18902900, 3.40681200, -2.91638900  
H, 0.74547600, 1.23512800, -1.75732400  
H, -3.26717600, -1.95844400, 0.82909500  
H, -4.79050300, -0.19091900, 1.72590800  
H, -3.44790600, 2.49849400, -1.33237400  
H, -1.94531500, 0.71733300, -2.22746200  
H, -4.92031400, 3.31973400, 0.37847700  
H, -5.10997000, 2.40362900, 1.88335000  
H, -6.18929600, 2.09873000, 0.52249800

### 3a

Opt @ M06-2X/6-31G(d)

SCF Done: E(M062X) = -1607.349241a.u.

Zero-point correction = 0.431377Hartree/Particle

Sum of electronic and thermal Free Energies = -1606.971376a.u.

-----  
S, 0.19230500, -0.19886500, 2.22176300  
O, -0.21589700, 1.01875900, 2.90003500  
O, 0.46017100, -1.41795700, 2.97240000  
N, -1.07436800, -0.62013900, 1.15831800  
C, -3.35026400, -3.05901600, 0.04689500  
C, -2.46145400, -2.07368300, 0.05112900  
C, -1.12072900, -2.06014400, 0.75924000  
C, -0.08076300, -2.11847800, -0.34792700  
C, 0.76095100, -3.13457900, -0.75562600  
C, 1.66145900, -2.86852300, -1.79274400  
C, 1.69104700, -1.61279000, -2.38807700  
C, 0.81437700, -0.59561800, -1.98718200  
C, -0.08398300, -0.85754700, -0.96544800  
C, -1.18097600, -0.04875300, -0.23437300  
C, -2.52154000, -0.74692100, -0.63461300

C, -3.82543300, -0.01660400, -0.77359800  
C, -3.14000200, -0.56986600, -1.98696100  
C, -1.25956000, 1.44997500, -0.34301300  
C, -0.97069500, 2.09888300, -1.54699200  
C, -1.11388100, 3.47982900, -1.66396600  
C, -1.56203300, 4.22999500, -0.58214600  
C, -1.89833900, 3.58484000, 0.60615200  
C, -1.76435100, 2.20504200, 0.72219700  
C, 1.64177300, 0.20256300, 1.27074800  
C, 2.57308400, -0.79753700, 1.00261700  
C, 3.66265100, -0.49766200, 0.19822600  
C, 3.83037900, 0.78345400, -0.34078900  
C, 2.89529000, 1.77258000, -0.03019600  
C, 1.79813100, 1.49428200, 0.78002100  
C, 4.99747600, 1.07325900, -1.24838000  
H, -4.27678500, -2.98577400, -0.51724200  
H, -3.18606500, -3.97215300, 0.60943500  
H, -1.00315400, -2.74088300, 1.59837300  
H, 0.74418200, -4.10399700, -0.26585500  
H, 2.35267000, -3.63904800, -2.11995800  
H, 2.41397300, -1.40669800, -3.17200300  
H, 0.89987500, 0.38040600, -2.44847400  
H, -4.70091900, -0.52988100, -0.38776300  
H, -3.82347400, 1.06066400, -0.64244800  
H, -2.67475000, 0.14323600, -2.66218600  
H, -3.53829300, -1.46082500, -2.46303300  
H, -0.65435600, 1.52908500, -2.41208000  
H, -0.87742900, 3.96479200, -2.60601500  
H, -1.66551600, 5.30713000, -0.66874500  
H, -2.27248100, 4.15580600, 1.45005100  
H, -2.03295000, 1.70743900, 1.64619600  
H, 2.43151800, -1.78937900, 1.41858300  
H, 4.39235700, -1.27153700, -0.02620000  
H, 3.02636700, 2.77649700, -0.42465700  
H, 1.07531800, 2.26388500, 1.03238400  
H, 5.93851500, 0.74091000, -0.79993600  
H, 5.08008500, 2.14103900, -1.46434200  
H, 4.88511700, 0.54379200, -2.20114100

## 2a

Opt @ M06-2X/6-31G(d)

SCF Done: E(M062X) = -1607.349946a.u.

Zero-point correction = 0.430480Hartree/Particle

Sum of electronic and thermal Free Energies = -1606.972791a.u.

-----  
S, -0.29559400, -2.32645500, -1.30328400  
O, -0.33022500, -2.15571100, -2.74485100  
O, -0.55333300, -3.60581000, -0.66760200  
N, -1.46013100, -1.25761900, -0.69255400  
C, -1.58080600, -1.18107800, 0.73147400  
C, -1.93840200, -2.22215800, 1.58137700  
C, -2.02105200, -1.94786600, 2.94494700  
C, -1.77862400, -0.66474700, 3.43685100  
C, -1.43872100, 0.37131100, 2.56790800  
C, -1.32621700, 0.10963700, 1.20626600  
C, -1.01589400, 1.05406700, 0.06763800  
C, -1.35596600, 0.12904800, -1.16497500  
C, -2.67581700, 0.86512900, -1.32096800  
C, -2.25959100, 1.89863600, -0.32802900  
C, -3.14343500, 2.72195800, 0.55485400  
C, -2.33343300, 3.38838700, -0.51592100  
C, -3.77732500, 0.60061800, -2.00735900  
C, 0.33033600, 1.74099500, 0.09000500  
C, 0.71453600, 2.50743100, -1.02026900  
C, 1.94481200, 3.15151200, -1.05588800  
C, 2.81654200, 3.05362800, 0.02897500  
C, 2.44859000, 2.29271400, 1.13235500  
C, 1.22060900, 1.63198300, 1.15856700  
C, 1.25859000, -1.70583000, -0.70845500  
C, 2.00594700, -0.85327500, -1.51896800  
C, 3.19239900, -0.32731100, -1.02627700  
C, 3.63879000, -0.64242900, 0.26082300  
C, 2.86781100, -1.49718100, 1.05290100  
C, 1.67533800, -2.03364500, 0.57921100  
C, 4.93655400, -0.07382900, 0.77101800  
H, -2.13498000, -3.20976100, 1.18183700  
H, -2.29386700, -2.74378800, 3.63069200  
H, -1.86587800, -0.46912100, 4.50081700  
H, -1.25473600, 1.37202000, 2.95014600  
H, -0.69096500, 0.21079000, -2.02736600  
H, -4.21500300, 2.61591900, 0.41410800  
H, -2.83043300, 2.85811000, 1.58571700  
H, -1.47148000, 3.97356900, -0.20907000  
H, -2.84127900, 3.74318000, -1.40793200  
H, -3.83935600, -0.27790900, -2.64189900  
H, -4.65286700, 1.24169000, -1.94588300  
H, 0.03362800, 2.60058400, -1.86368100  
H, 2.22123500, 3.73756900, -1.92727000

H, 3.77343300, 3.56716200, 0.01034100  
H, 3.12369400, 2.19832700, 1.97866000  
H, 0.96767800, 1.01195300, 2.01214200  
H, 1.66286100, -0.62681300, -2.52367100  
H, 3.77838700, 0.34724300, -1.64462100  
H, 3.20609300, -1.74710200, 2.05491700  
H, 1.07986600, -2.70795100, 1.18675300  
H, 5.78850600, -0.65102900, 0.39517000  
H, 4.97754700, -0.09289200, 1.86341000  
H, 5.06337600, 0.96079300, 0.43835700

## 2y

Opt @ M06-2X/6-31G(d)

SCF Done: E(M062X) = -1608.577404a.u.

Zero-point correction = 0.453188Hartree/Particle

Sum of electronic and thermal Free Energies = -1608.178651a.u.

-----  
S, -0.37600300, -2.25711400, -1.38512800  
O, -0.36875800, -2.00790400, -2.81634000  
O, -0.71120200, -3.55483800, -0.82715800  
N, -1.51063200, -1.17346700, -0.73956000  
C, -1.58543800, -1.11995800, 0.68709900  
C, -1.95334200, -2.17006700, 1.52137400  
C, -1.97784000, -1.93266500, 2.89318400  
C, -1.67586900, -0.67016400, 3.40487800  
C, -1.33225700, 0.37591100, 2.55021000  
C, -1.26599700, 0.15141100, 1.17649300  
C, -0.95344900, 1.11115100, 0.03989100  
C, -1.41748700, 0.22649800, -1.17378500  
C, -2.74096200, 0.96590300, -1.14625500  
C, -2.19493600, 2.07973600, -0.26563600  
C, -3.06540400, 2.49111900, 0.91618900  
C, -1.84089700, 3.32362000, -1.08622500  
C, -3.95020200, 0.63904000, -1.57316200  
C, 0.45185100, 1.69065500, 0.03686500  
C, 1.01122700, 2.17968900, -1.15360700  
C, 2.27086100, 2.76636500, -1.17997500  
C, 3.02227800, 2.86541200, -0.01138400  
C, 2.50236100, 2.35020200, 1.17031400  
C, 1.23653400, 1.76633800, 1.19160300  
C, 1.18856100, -1.74861500, -0.71861200  
C, 2.03825800, -0.97224400, -1.50015300  
C, 3.22211700, -0.50339100, -0.94385000  
C, 3.55572200, -0.78796000, 0.38229800

C, 2.68707900, -1.57774400, 1.14223400  
 C, 1.50569200, -2.06805000, 0.60139900  
 C, 4.83850600, -0.26536700, 0.97294800  
 H, -2.19933000, -3.13759900, 1.10001500  
 H, -2.25683300, -2.73546500, 3.56830300  
 H, -1.72683800, -0.49455200, 4.47466800  
 H, -1.13796000, 1.36499500, 2.95546800  
 H, -0.85288600, 0.31084100, -2.10491600  
 H, -3.42219600, 1.62765000, 1.48061300  
 H, -2.51146100, 3.15254900, 1.59341900  
 H, -1.17252400, 3.98967300, -0.53065500  
 H, -1.36858800, 3.08118300, -2.04042200  
 H, -4.11578200, -0.27849100, -2.13013100  
 H, -4.81296300, 1.26685100, -1.36662500  
 H, 0.46257100, 2.09258000, -2.08580700  
 H, 2.66772000, 3.13997300, -2.11934400  
 H, 4.00468200, 3.32834800, -0.02580900  
 H, 3.08410300, 2.39421300, 2.08686700  
 H, 0.87357400, 1.34639700, 2.12186900  
 H, 1.76743500, -0.74674800, -2.52696200  
 H, 3.88831200, 0.11264300, -1.54146300  
 H, 2.94006300, -1.80998200, 2.17321200  
 H, 0.83781100, -2.69113400, 1.18731900  
 H, 5.67431300, -0.93643900, 0.74576000  
 H, 4.76733400, -0.17940900, 2.06063300  
 H, 5.08030900, 0.72025100, 0.56504700  
 H, -2.76445600, 3.86552900, -1.31375300  
 H, -3.93806200, 3.04521900, 0.55364200

**2z**

Opt @ M06-2X/6-31G(d)

SCF Done: E(M062X) = -1646.644990a.u.

Zero-point correction = 0.460335Hartree/Particle

Sum of electronic and thermal Free Energies = -1646.238875a.u.

-----

S, 0.48564200, -2.35290400, -1.36962000  
 O, 0.40112000, -2.14509300, -2.80443700  
 O, 0.58451700, -3.67729100, -0.78306900  
 N, -0.92342500, -1.66494900, -0.72833200  
 C, -1.04261000, -1.65531900, 0.69729700  
 C, -1.09175100, -2.77278000, 1.52300100  
 C, -1.23377200, -2.56210900, 2.89315200  
 C, -1.35029000, -1.27302200, 3.41346200  
 C, -1.31546100, -0.16419400, 2.56831100

C, -1.14512300, -0.35328300, 1.19994500  
C, -1.10549200, 0.66567000, 0.08135600  
C, -1.22915800, -0.29328700, -1.15837900  
C, -2.71028800, 0.02909900, -1.20415100  
C, -3.73727100, -0.60598900, -1.74821000  
C, 0.02560200, 1.66877800, 0.11167800  
C, 0.24834800, 2.47347100, -1.01581700  
C, 1.26282000, 3.42249900, -1.03540500  
C, 2.08267100, 3.59153900, 0.07994900  
C, 1.88379800, 2.78950400, 1.19771700  
C, 0.87112000, 1.83075500, 1.21031800  
C, 1.81664800, -1.36048700, -0.74077900  
C, 2.31582700, -0.32010900, -1.52095200  
C, 3.31576700, 0.48988200, -0.99941400  
C, 3.81720200, 0.27459200, 0.28755900  
C, 3.29605200, -0.77505900, 1.04908800  
C, 2.29612900, -1.59898100, 0.54522200  
C, 4.91050100, 1.15556100, 0.83189000  
H, -1.01364900, -3.76711200, 1.09983700  
H, -1.27117400, -3.41714800, 3.56077700  
H, -1.48044700, -1.13164700, 4.48163400  
H, -1.41455000, 0.83854300, 2.97498600  
H, -0.66542000, -0.02096900, -2.05352700  
H, -3.58236500, -1.49567300, -2.35160100  
H, -4.76090500, -0.27401000, -1.59505700  
H, -0.38587100, 2.35468200, -1.89145600  
H, 1.41140400, 4.03360100, -1.92068500  
H, 2.87026500, 4.33943200, 0.07308000  
H, 2.52669900, 2.89800700, 2.06707700  
H, 0.75630400, 1.19252500, 2.07976300  
H, 1.92934100, -0.16507700, -2.52348800  
H, 3.70568100, 1.31151800, -1.59398000  
H, 3.67896500, -0.94965100, 2.05100500  
H, 1.89774200, -2.42300100, 1.12881000  
H, 5.89327800, 0.81092600, 0.49163400  
H, 4.91712500, 1.15133800, 1.92526100  
H, 4.78306600, 2.18727700, 0.49120000  
C, -2.55441600, 1.18989700, -0.24323700  
C, -3.66086900, 1.43365400, 0.80008000  
C, -2.85539500, 2.60102000, -0.81601500  
C, -4.24161900, 2.51098900, -0.14269100  
H, -3.25022500, 1.88630200, 1.70876500  
H, -4.27888700, 0.57294700, 1.06883300  
H, -2.22709500, 3.35816000, -0.33692900



H, -2.81366900, 2.72387300, -1.90178000  
H, -4.64196200, 3.42084100, 0.30927100  
H, -4.98886400, 2.09074200, -0.82099600

## 2aa

Opt @ M06-2X/6-31G(d)

SCF Done: E(M062X) = -1529.989761a.u.

Zero-point correction = 0.396467Hartree/Particle

Sum of electronic and thermal Free Energies = -1529.644429a.u.

-----  
S, -1.12609500, -1.89077800, -1.22275900  
O, -1.10519500, -1.78083300, -2.67050300  
O, -1.78087100, -2.99039100, -0.53741700  
N, -1.88726100, -0.48204900, -0.67421100  
C, -1.97714300, -0.29565900, 0.74159200  
C, -2.63477700, -1.12609000, 1.64284200  
C, -2.64249500, -0.74985900, 2.98451300  
C, -2.03707600, 0.43539100, 3.40463100  
C, -1.39561900, 1.26362700, 2.48451900  
C, -1.35029800, 0.88677100, 1.14700200  
C, -0.73911200, 1.61216500, -0.03122300  
C, -1.37302500, 0.78525500, -1.20981600  
C, -2.41010400, 1.88450700, -1.35702600  
C, -1.61323000, 2.83189100, -0.48072200  
C, -3.61600500, 1.89038700, -1.90107400  
C, 0.76263900, 1.80388900, -0.00296800  
C, 1.39777700, 2.34313000, -1.13067400  
C, 2.77217700, 2.54384300, -1.15468700  
C, 3.54541800, 2.21646600, -0.04103100  
C, 2.92881400, 1.67061200, 1.07870000  
C, 1.55115900, 1.45479800, 1.09387200  
C, 0.54527100, -1.78030300, -0.63413000  
C, 1.52606700, -1.24581900, -1.46742900  
C, 2.82011900, -1.11534000, -0.98250900  
C, 3.14346900, -1.51020700, 0.31942300  
C, 2.13928000, -2.03926800, 1.13414600  
C, 0.83635800, -2.17826400, 0.66805300  
C, 4.55656200, -1.37284000, 0.82139000  
H, -3.11671400, -2.03314100, 1.29820100  
H, -3.14610900, -1.38183500, 3.70922000  
H, -2.07560600, 0.71956400, 4.45134900  
H, -0.93156400, 2.19291200, 2.80549200  
H, -0.74536000, 0.62428600, -2.08960400  
H, -3.99158200, 1.01289100, -2.41924400

H, -4.26723300, 2.75688400, -1.83463200  
H, 0.80777500, 2.60739800, -2.00596300  
H, 3.23998400, 2.96306800, -2.04045900  
H, 4.61829300, 2.38531800, -0.05037200  
H, 3.52113600, 1.39783800, 1.94803100  
H, 1.09347600, 0.99827800, 1.96512700  
H, 1.27225300, -0.95659000, -2.48249400  
H, 3.59157900, -0.68989400, -1.61858700  
H, 2.38091200, -2.34797600, 2.14766100  
H, 0.05611500, -2.60164300, 1.29274000  
H, 5.17785600, -2.20250600, 0.46660600  
H, 4.59287500, -1.37304300, 1.91407400  
H, 5.00666700, -0.44304900, 0.46064800  
H, -1.02921000, 3.56296100, -1.04970900  
H, -2.15602000, 3.35036100, 0.31453900

**TS1<sub>1a-1</sub>**

Opt @ M06-2X/6-31G(d)

SCF Done: E(M062X) = -1607.178639a.u.

Zero-point correction = 0.423938Hartree/Particle

Sum of electronic and thermal Free Energies = -1606.809615a.u.

-----  
S, 0.26840100, -2.25222100, -1.32291300  
O, 0.29183300, -2.03707200, -2.75701400  
O, 0.18277300, -3.57254300, -0.72617600  
N, -1.10169700, -1.40198400, -0.80109000  
C, -1.42260900, -1.29540100, 0.59544700  
C, -1.58340100, -2.39523000, 1.42982700  
C, -1.92475800, -2.17957400, 2.76572000  
C, -2.13651600, -0.89153100, 3.24495700  
C, -1.99532000, 0.20428600, 2.39079800  
C, -1.62835100, 0.02129300, 1.06256900  
C, -1.41486700, 1.16342000, 0.09828300  
C, -1.49324600, -0.19627000, -1.42768000  
C, -2.86311700, -0.01833700, -1.64627700  
C, -2.46817500, 1.94730300, -0.36569600  
C, -3.79467300, 2.42122800, 0.02290200  
C, -2.78371600, 3.35076100, -0.64937700  
C, -3.97636200, -0.56400600, -1.19483300  
C, -0.05309700, 1.78825300, 0.07771500  
C, 0.33087900, 2.61007200, -0.99238900  
C, 1.54146700, 3.29169800, -0.96838900  
C, 2.39096600, 3.17489600, 0.13108300  
C, 2.03130300, 2.34019200, 1.18426300

C,0.82940200,1.63757800,1.15274000  
 C,1.66794100,-1.42645700,-0.61581500  
 C,2.33424400,-0.46427900,-1.37360500  
 C,3.44861700,0.15569100,-0.82957600  
 C,3.89534800,-0.16360700,0.45776300  
 C,3.20054300,-1.12274000,1.19653400  
 C,2.08613900,-1.76612100,0.66629000  
 C,5.10306600,0.53405700,1.02482100  
 H,-1.44669600,-3.39376900,1.03128100  
 H,-2.04938600,-3.03212300,3.42565200  
 H,-2.42288600,-0.73569000,4.28004200  
 H,-2.16076700,1.21341900,2.75885200  
 H,-0.73608600,0.35727100,-1.97455500  
 H,-4.65712100,2.10239100,-0.55804700  
 H,-3.99389700,2.55470900,1.08478200  
 H,-2.28921600,4.12367500,-0.06218100  
 H,-2.99985100,3.63965800,-1.67469900  
 H,-4.01316600,-1.17481200,-0.28586700  
 H,-4.93379700,-0.36957700,-1.67681400  
 H,-0.33926300,2.72186100,-1.84110800  
 H,1.81675300,3.92576000,-1.80589900  
 H,3.32794600,3.72379600,0.16000600  
 H,2.69251500,2.22438300,2.03902200  
 H,0.56833400,0.98238700,1.97779600  
 H,1.99209100,-0.23457500,-2.37755500  
 H,3.97772700,0.90974100,-1.40602000  
 H,3.54120300,-1.37811900,2.19617800  
 H,1.55959800,-2.53460000,1.22325900  
 H,6.01532200,0.22373300,0.50457200  
 H,5.23013100,0.31484800,2.08785000  
 H,5.01088500,1.61894500,0.90477100

**1r**

Opt @ M06-2X/6-31G(d)

SCF Done: E(M062X) = -808.396784a.u.

Zero-point correction = 0.293144Hartree/Particle

Sum of electronic and thermal Free Energies = -808.149477a.u.

-----

C,1.02945400,0.39866400,-0.69960600  
 C,2.26029100,0.94290300,-0.30834400  
 C,3.45348900,0.43441100,-0.80605400  
 C,3.44248600,-0.63670000,-1.69883800  
 C,2.22700600,-1.18938500,-2.08801000  
 C,1.03116600,-0.67727500,-1.59276800

H, 2.27661400, 1.75898200, 0.40640600  
 H, 4.39707000, 0.87064600, -0.49046600  
 H, 4.37505600, -1.03822900, -2.08310500  
 H, 2.20553000, -2.02585800, -2.77978900  
 H, 0.08792300, -1.11692400, -1.90277200  
 C, -1.48950500, 0.12256200, -0.23757700  
 C, -1.55371500, -1.19097900, 0.25432000  
 C, -2.64726100, 0.64832100, -0.82308200  
 C, -2.71680300, -1.94784200, 0.14114000  
 C, -3.81631400, -0.09560400, -0.93224200  
 H, -2.60433200, 1.65846500, -1.21894300  
 C, -3.84753800, -1.40390700, -0.45582400  
 H, -2.70823300, -2.95809700, 0.53631500  
 H, -4.69366800, 0.33944300, -1.39969400  
 H, -4.75128500, -1.99896100, -0.54115200  
 C, -0.24875600, 0.95075100, -0.17689800  
 C, -0.33863200, 2.19088400, 0.30115400  
 C, 0.29164200, 3.47585700, 0.60657500  
 C, -1.19002600, 3.22515300, 0.89101200  
 H, 0.55136400, 4.13766900, -0.21674200  
 H, 0.96094400, 3.54349800, 1.46143600  
 H, -1.49637300, 3.11935800, 1.92923700  
 H, -1.91748900, 3.73206800, 0.26172400  
 C, 0.15749600, -1.14153700, 1.85598100  
 C, 1.43115600, -1.30806300, 2.09838000  
 C, 2.70303500, -1.45603200, 2.34559100  
 H, 3.07402800, -2.24876000, 2.99131600  
 H, 3.43731500, -0.79246200, 1.89248600  
 H, -0.48084300, -0.49648700, 2.45597300  
 O, -0.47320600, -1.81718100, 0.83103900

**TS1<sub>1r</sub>**

Opt @ M06-2X/6-31G(d)

SCF Done: E(M062X) = -808.368097a.u.

Zero-point correction = 0.293531Hartree/Particle

Sum of electronic and thermal Free Energies = -808.117583a.u.

-----

C, -2.19501000, -0.03788000, -0.39574100  
 C, -3.44037300, -0.67784500, -0.49565300  
 C, -3.61515300, -1.95172100, 0.00422600  
 C, -2.54101200, -2.61155700, 0.61750800  
 C, -1.32408300, -1.97143300, 0.73473100  
 C, -1.11728900, -0.65668600, 0.25942900  
 C, 0.12954700, 0.05580400, 0.52892500

C, -1.17319000, 1.96423000, -1.44608800  
C, 0.11922000, 2.03851400, -1.09023900  
C, 0.00603300, 1.39171900, 0.82458400  
C, -0.94344600, 2.19897700, 1.61101200  
C, 0.55899100, 2.43291600, 1.71252900  
C, 1.35420600, 2.33968200, -1.48169900  
C, 1.43778100, -0.55239400, 0.25868600  
C, 2.62373600, 0.09674000, 0.64252600  
C, 3.86959100, -0.43929300, 0.33422300  
C, 3.96641600, -1.63195500, -0.37533200  
C, 2.80116100, -2.27593000, -0.78900800  
C, 1.55679800, -1.74097400, -0.48546700  
H, -4.24254400, -0.14642700, -0.99658300  
H, -4.57987600, -2.44009300, -0.08754500  
H, -2.66920900, -3.61166300, 1.01837700  
H, -0.49931100, -2.45874100, 1.24681000  
H, -1.58786700, 2.73077000, -2.09412700  
H, -1.52757900, 2.96094900, 1.10411800  
H, -1.44957100, 1.70702300, 2.43730600  
H, 1.07112100, 2.11152600, 2.61590500  
H, 0.94826700, 3.34830200, 1.27427800  
H, 1.72954300, 2.02498100, -2.45063900  
H, 2.05378300, 2.84366500, -0.82062100  
H, 2.56735700, 1.02422600, 1.19968600  
H, 4.76887800, 0.08059600, 0.65069500  
H, 4.93887400, -2.05103900, -0.61440000  
H, 2.86239500, -3.19427500, -1.36515400  
H, 0.66271100, -2.23676500, -0.84816000  
O, -2.18631500, 1.18518500, -1.01060600

**INT1<sub>1r</sub>**

Opt @ M06-2X/6-31G(d)

SCF Done: E(M062X) = -808.397725a.u.

Zero-point correction = 0.296176Hartree/Particle

Sum of electronic and thermal Free Energies = -808.143609a.u.

-----  
C, -2.18162800, -0.00396600, -0.46132200  
C, -3.47561700, -0.55143800, -0.51459800  
C, -3.71107300, -1.79545100, 0.02063700  
C, -2.64750200, -2.52073200, 0.60107600  
C, -1.38644000, -1.97994100, 0.66306100  
C, -1.10562100, -0.66967600, 0.17905600  
C, 0.13464000, 0.00498400, 0.35110100  
C, -0.97584100, 1.86718800, -1.49113600

C, 0.13489500, 2.15576500, -0.66966600  
 C, 0.02820400, 1.45474800, 0.65186000  
 C, -0.95697200, 1.96127500, 1.66866800  
 C, 0.51834200, 2.09152500, 1.91948800  
 C, 1.20944500, 2.87886500, -1.07344800  
 C, 1.43530800, -0.59070200, 0.14940700  
 C, 2.61279800, 0.14372200, 0.41206100  
 C, 3.87002900, -0.39442000, 0.15074800  
 C, 3.99751200, -1.67287800, -0.37696600  
 C, 2.84350700, -2.40830100, -0.66785800  
 C, 1.59063200, -1.87660800, -0.42523900  
 H, -4.25525200, 0.01821000, -1.00922600  
 H, -4.70738100, -2.22282000, -0.01673100  
 H, -2.83398300, -3.50081500, 1.02849500  
 H, -0.58605000, -2.51390900, 1.16598300  
 H, -1.16097600, 2.44587400, -2.39151000  
 H, -1.51052200, 2.86259300, 1.42405900  
 H, -1.50750500, 1.22052600, 2.23995100  
 H, 0.96562500, 1.43681600, 2.66022700  
 H, 0.96468200, 3.07923700, 1.85302900  
 H, 1.34150200, 3.17721400, -2.10780600  
 H, 1.97123200, 3.17692900, -0.36333200  
 H, 2.54081500, 1.13418100, 0.84251300  
 H, 4.75599800, 0.19496900, 0.36795500  
 H, 4.97909700, -2.09254600, -0.57318300  
 H, 2.92784800, -3.39725400, -1.10870900  
 H, 0.70959700, -2.44012500, -0.71404000  
 O, -2.02530500, 1.10714400, -1.22740600

**TS2<sub>1r</sub>**

Opt @ M06-2X/6-31G(d)

SCF Done: E(M062X) = -808.396297a.u.

Zero-point correction = 0.295659Hartree/Particle

Sum of electronic and thermal Free Energies = -808.142158a.u.

-----

C, -2.17355500, 0.00753000, -0.54324900  
 C, -3.48224200, -0.48755600, -0.57100800  
 C, -3.75668300, -1.68555700, 0.05752100  
 C, -2.72769500, -2.40312400, 0.69378200  
 C, -1.44283000, -1.90123400, 0.72412400  
 C, -1.13196200, -0.64861300, 0.14459800  
 C, 0.12064600, 0.04005800, 0.24269000  
 C, -0.72820300, 1.65216000, -1.57999000  
 C, 0.18788600, 2.19005900, -0.62945200

C, 0.02503300, 1.47528100, 0.66238100  
 C, -0.97857800, 1.93913800, 1.68174100  
 C, 0.49095900, 2.01181200, 1.98238500  
 C, 1.21539300, 3.00113700, -0.96486700  
 C, 1.41706800, -0.58338600, 0.09220500  
 C, 2.60021800, 0.12291100, 0.39540000  
 C, 3.84967500, -0.45399800, 0.18701700  
 C, 3.95854400, -1.74433600, -0.31777600  
 C, 2.79710100, -2.45461800, -0.63711100  
 C, 1.55131900, -1.88332100, -0.44938000  
 H, -4.24207000, 0.06681900, -1.11102600  
 H, -4.76681300, -2.08146800, 0.04347100  
 H, -2.95067300, -3.34395200, 1.18643300  
 H, -0.65723800, -2.42721900, 1.25880000  
 H, -0.70817700, 2.03458700, -2.59864500  
 H, -1.50155600, 2.86779800, 1.47717600  
 H, -1.56643300, 1.17868800, 2.18647800  
 H, 0.89864700, 1.29551600, 2.68838500  
 H, 0.96702000, 2.98795400, 1.99613200  
 H, 1.38125100, 3.31439700, -1.99027600  
 H, 1.91421400, 3.34886400, -0.21311100  
 H, 2.53638100, 1.12280800, 0.80610500  
 H, 4.74444300, 0.11171700, 0.42930800  
 H, 4.93450400, -2.19423600, -0.47026600  
 H, 2.87019900, -3.45545500, -1.05219700  
 H, 0.66083700, -2.42731500, -0.74853800  
 O, -1.90838800, 1.05430400, -1.36428700

**2x**

Opt @ M06-2X/6-31G(d)

SCF Done: E(M062X) = -808.462397a.u.

Zero-point correction = 0.297402Hartree/Particle

Sum of electronic and thermal Free Energies = -808.208052a.u.

-----

C, -1.96441300, -0.51496500, -0.86611200  
 C, -3.15927100, -1.21735000, -0.91252800  
 C, -3.43382200, -2.09006300, 0.14070200  
 C, -2.54284700, -2.24731500, 1.20192700  
 C, -1.34541900, -1.52862600, 1.22590400  
 C, -1.05359600, -0.66155400, 0.18137800  
 C, 0.11778400, 0.25983700, -0.05403400  
 C, -0.39268300, 1.01588100, -1.34235300  
 C, -0.63224200, 2.25665200, -0.49632500  
 C, -0.03248800, 1.60678400, 0.70610900

C,-0.45192900,1.80344700,2.13153900  
 C,0.91470100,2.22925400,1.69267100  
 C,-1.20937700,3.42459600,-0.74282400  
 C,1.49361200,-0.36166800,-0.12137700  
 C,2.60014000,0.46354600,-0.36449900  
 C,3.87945100,-0.06853600,-0.47254900  
 C,4.07935300,-1.44113100,-0.33645500  
 C,2.98811800,-2.27079400,-0.10376500  
 C,1.70476900,-1.73640100,-0.00132400  
 H,-3.84538800,-1.08113000,-1.74076000  
 H,-4.36167700,-2.65372100,0.13176800  
 H,-2.78101400,-2.92838600,2.01211400  
 H,-0.64394800,-1.65218900,2.04740200  
 H,0.31886600,1.11997600,-2.16479100  
 H,-1.20345900,2.56444400,2.31968900  
 H,-0.53739800,0.91363800,2.74830100  
 H,1.76191100,1.62918300,2.01160500  
 H,1.11782100,3.28994900,1.57453600  
 H,-1.60869100,3.65845100,-1.72474900  
 H,-1.31534500,4.18039300,0.03160700  
 H,2.45156900,1.53564500,-0.47133500  
 H,4.72204600,0.58916900,-0.66361900  
 H,5.07809300,-1.85882300,-0.41679800  
 H,3.13038900,-3.34282000,-0.00603400  
 H,0.86023600,-2.39813200,0.16034100  
 O,-1.56288000,0.36309900,-1.83072300

**TS1<sub>1aa</sub>**

Opt @ M06-2X/6-31G(d)

SCF Done: E(M062X) = -1529.930774a.u.

Zero-point correction = 0.391802Hartree/Particle

Sum of electronic and thermal Free Energies = -1529.594758a.u.

-----

C,2.24423300,-0.67433900,-0.16570900  
 C,3.05645500,-1.57145200,-0.85011800  
 C,4.33756200,-1.15396100,-1.20111600  
 C,4.78426400,0.12175600,-0.85734400  
 C,3.95391400,1.00109800,-0.16438800  
 C,2.65801400,0.60983700,0.16870000  
 C,1.65331800,1.37426400,0.95992200  
 C,0.48478000,-1.25066800,1.52367200  
 C,1.03896000,-0.62910500,2.62513200  
 C,1.64945900,1.03900700,2.33469200  
 C,1.27815600,-1.08058500,3.86458600



C, 0.58564100, 2.08682800, 0.30052200  
C, -0.56579300, 2.51655900, 0.99734100  
C, -1.56064300, 3.24795300, 0.35946800  
C, -1.45730800, 3.56336500, -0.99414300  
C, -0.33506100, 3.12783400, -1.70636500  
C, 0.66427000, 2.40195800, -1.07754500  
H, 2.69235100, -2.56328700, -1.10148800  
H, 4.99222500, -1.83121600, -1.73967100  
H, 5.78755800, 0.43194600, -1.13239800  
H, 4.29768500, 1.99426500, 0.10949800  
H, -0.44266300, -1.80494500, 1.62534900  
H, 1.35155900, -2.13932300, 4.08972400  
H, 1.47544200, -0.38850600, 4.68019000  
H, -0.68405200, 2.27493300, 2.04854400  
H, -2.43003500, 3.56914900, 0.92712500  
H, -2.23291100, 4.14022000, -1.48805100  
H, -0.24217100, 3.35552100, -2.76419800  
H, 1.52520300, 2.06458400, -1.64692900  
N, 0.88716200, -1.00907300, 0.23441800  
S, -0.09397200, -1.63038000, -1.05451500  
O, 0.30352200, -0.86687000, -2.21942600  
O, 0.01683300, -3.08058900, -1.02954800  
C, -1.73521400, -1.18893600, -0.56960000  
C, -2.57891300, -2.17572700, -0.06423800  
C, -2.15808900, 0.12357300, -0.74995900  
C, -3.87765000, -1.82477200, 0.28095700  
H, -2.21672500, -3.19354300, 0.04129200  
C, -3.46196200, 0.44963000, -0.39699000  
H, -1.48564300, 0.86943500, -1.16397000  
C, -4.33522300, -0.51227500, 0.11895900  
H, -4.54995400, -2.58068200, 0.67718900  
H, -3.80057500, 1.47382600, -0.52729200  
C, -5.75618700, -0.15093700, 0.46441700  
H, -5.83818400, 0.89924700, 0.75544900  
H, -6.41244200, -0.30784900, -0.39875200  
H, -6.13497200, -0.76738500, 1.28372900  
H, 2.64715900, 0.88906500, 2.73986800  
H, 1.02983700, 1.63837100, 3.00279200

**INT1<sub>1aa</sub>**

Opt @ M06-2X/6-31G(d)

SCF Done: E(M062X) = -1529.918867a.u.

Zero-point correction = 0.394950Hartree/Particle

Sum of electronic and thermal Free Energies = -1529.577414a.u.

-----  
C,1.28450000,-1.02355300,1.11943800  
C,2.42251800,-0.73134200,1.89809900  
C,2.30797600,0.10664400,2.98814000  
C,1.06238900,0.66819300,3.32249000  
C,-0.06904300,0.30742100,2.62341700  
C,-0.01400100,-0.61545100,1.55146800  
C,-1.15940900,-1.24236200,0.97579700  
C,0.46294800,-2.15636200,-0.93118100  
C,-0.66287700,-2.93952000,-0.53745800  
C,-1.05942700,-2.74863700,0.89339700  
C,-1.44578100,-3.53684300,-1.46576300  
C,-2.36028200,-0.55293300,0.57409900  
C,-3.50725900,-1.25593100,0.14432100  
C,-4.63393900,-0.58110900,-0.31680100  
C,-4.66293400,0.80793900,-0.36216800  
C,-3.53411800,1.52343600,0.05037900  
C,-2.40471300,0.86149800,0.49722900  
H,3.38212000,-1.14793900,1.62354900  
H,3.18445600,0.32516300,3.58924200  
H,0.97899500,1.33180700,4.17763700  
H,-1.04789100,0.64674600,2.94954400  
H,0.71237100,-2.18149400,-1.98651200  
H,-1.24228000,-3.44816800,-2.52799600  
H,-2.30749600,-4.12313300,-1.16791300  
H,-3.52582400,-2.33869300,0.17886500  
H,-5.49971400,-1.15240900,-0.63880700  
H,-5.54658500,1.32961000,-0.71545000  
H,-3.53557900,2.60987700,0.00763300  
H,-1.52019500,1.43083500,0.76731400  
N,1.42952300,-1.55736900,-0.18187900  
S,2.51847100,-0.55923700,-1.19946600  
O,3.79083000,-0.44890000,-0.52240700  
O,2.43194700,-1.11277000,-2.53555500  
C,1.63250000,0.96687100,-1.10467300  
C,2.01886500,1.92264700,-0.16951500  
C,0.48355100,1.10901500,-1.87773000  
C,1.22398000,3.05083800,-0.01413400  
H,2.91141500,1.76918700,0.42777300  
C,-0.29452400,2.24674000,-1.70544100  
H,0.20497300,0.34529800,-2.59682400  
C,0.05800100,3.22295900,-0.76861700  
H,1.50557900,3.80515300,0.71539500  
H,-1.20171400,2.36700200,-2.29005800

C, -0.82733500, 4.41877100, -0.53553900  
H, -0.23847600, 5.33277600, -0.41818400  
H, -1.52854100, 4.56247300, -1.36092900  
H, -1.41203000, 4.28550500, 0.38230000  
H, -0.29581200, -3.11358800, 1.58580800  
H, -1.99169900, -3.26685200, 1.13039900

**TS2<sub>1aa</sub>**

Opt @ M06-2X/6-31G(d)

SCF Done: E(M062X) = -1529.918824a.u.

Zero-point correction = 0.394681Hartree/Particle

Sum of electronic and thermal Free Energies = -1529.576640a.u.

-----  
C, 1.26082400, -1.04862700, 1.11667700  
C, 2.40267400, -0.77968200, 1.89681200  
C, 2.30057500, 0.05737900, 2.98944500  
C, 1.06517700, 0.63977300, 3.32371200  
C, -0.07180400, 0.30210100, 2.62095500  
C, -0.02984200, -0.61672300, 1.54619300  
C, -1.18319400, -1.22311300, 0.96153200  
C, 0.39901500, -2.15092600, -0.92973200  
C, -0.72481100, -2.93843600, -0.53215200  
C, -1.11593800, -2.73358600, 0.89735300  
C, -1.51230600, -3.53341900, -1.45690600  
C, -2.37318500, -0.51303600, 0.56146600  
C, -3.53402300, -1.19681100, 0.13871600  
C, -4.65054100, -0.50344100, -0.31941100  
C, -4.65488000, 0.88577200, -0.36794200  
C, -3.51190800, 1.58204100, 0.03800400  
C, -2.39211600, 0.90153000, 0.48169600  
H, 3.35529600, -1.21160800, 1.62153500  
H, 3.18004800, 0.25953000, 3.59195700  
H, 0.99242600, 1.30212700, 4.18077700  
H, -1.04498600, 0.65914500, 2.94519800  
H, 0.63354900, -2.16486600, -1.98882400  
H, -1.30777600, -3.45165300, -2.51950400  
H, -2.37956400, -4.11009600, -1.15628200  
H, -3.57088200, -2.27904400, 0.17509300  
H, -5.52774300, -1.05999100, -0.63624000  
H, -5.53057700, 1.42243100, -0.71854900  
H, -3.49576300, 2.66815700, -0.00759400  
H, -1.49634500, 1.45535500, 0.74772700  
N, 1.39099100, -1.58359000, -0.18570500  
S, 2.49750300, -0.60953800, -1.20320400

O, 3.77542100, -0.53669200, -0.53132200  
O, 2.38922000, -1.15394000, -2.54145500  
C, 1.65637700, 0.94138600, -1.09908300  
C, 2.07620500, 1.88341300, -0.16574800  
C, 0.50739800, 1.11943500, -1.86601900  
C, 1.31710100, 3.03649600, -0.00555100  
H, 2.96790500, 1.70320300, 0.42523400  
C, -0.23402800, 2.27966100, -1.68886400  
H, 0.20313100, 0.36601900, -2.58554700  
C, 0.15391400, 3.24495500, -0.75307900  
H, 1.62682000, 3.78167000, 0.72169400  
H, -1.13955600, 2.42918100, -2.26963900  
C, -0.69832100, 4.46404900, -0.51800400  
H, -0.09622500, 5.31426100, -0.18770300  
H, -1.23940500, 4.75245400, -1.42263400  
H, -1.44076400, 4.26214400, 0.26324000  
H, -0.35916300, -3.10725000, 1.59259100  
H, -2.05870800, -3.22950000, 1.14046200

## 5. Characterization Data of Substrates

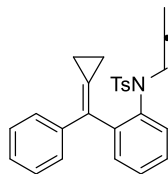

**4-methyl-N-(2-(cyclopropylidene(phenyl)methyl)phenyl)-N-(propa-1,2-dien-1-yl)benzenesulfonamide (1a):** Yield: 677 mg, 82%, yellow solid, m.p. 148-150 °C; Eluent: PE/EA = 30/1.  $^1\text{H}$  NMR (400 MHz,  $\text{CDCl}_3$ , TMS)  $\delta$  7.53 (d,  $J = 8.0$  Hz, 2H), 7.45 – 7.32 (m, 4H), 7.31 – 7.22 (m, 4H), 7.22 – 7.12 (m, 2H), 6.60 (d,  $J = 8.0$  Hz, 1H), 6.44 (t,  $J = 6.0$  Hz, 1H), 4.89 (d,  $J = 6.0$  Hz, 2H), 2.42 (s, 3H), 1.59 – 1.49 (m, 2H), 1.32 – 1.23 (m, 2H);  $^{13}\text{C}\{^1\text{H}\}$ -NMR (100 MHz,  $\text{CDCl}_3$ , TMS)  $\delta$  202.3, 143.6, 143.1, 140.6, 135.9, 135.7, 132.0, 129.4, 129.3, 128.8, 127.9, 127.5, 127.5, 127.4, 127.0, 126.7, 126.5, 102.1, 86.8, 21.6, 4.8, 2.5; IR (neat):  $\nu$  3042, 2974, 1595, 1491, 1362, 1162, 966, 880, 769  $\text{cm}^{-1}$ ; HRMS (ESI-TOF) Calcd for  $\text{C}_{20}\text{H}_{19}\text{NO}_2\text{Na}$   $[\text{M}+\text{Na}]^+$ : 436.13417, found: 436.13389.

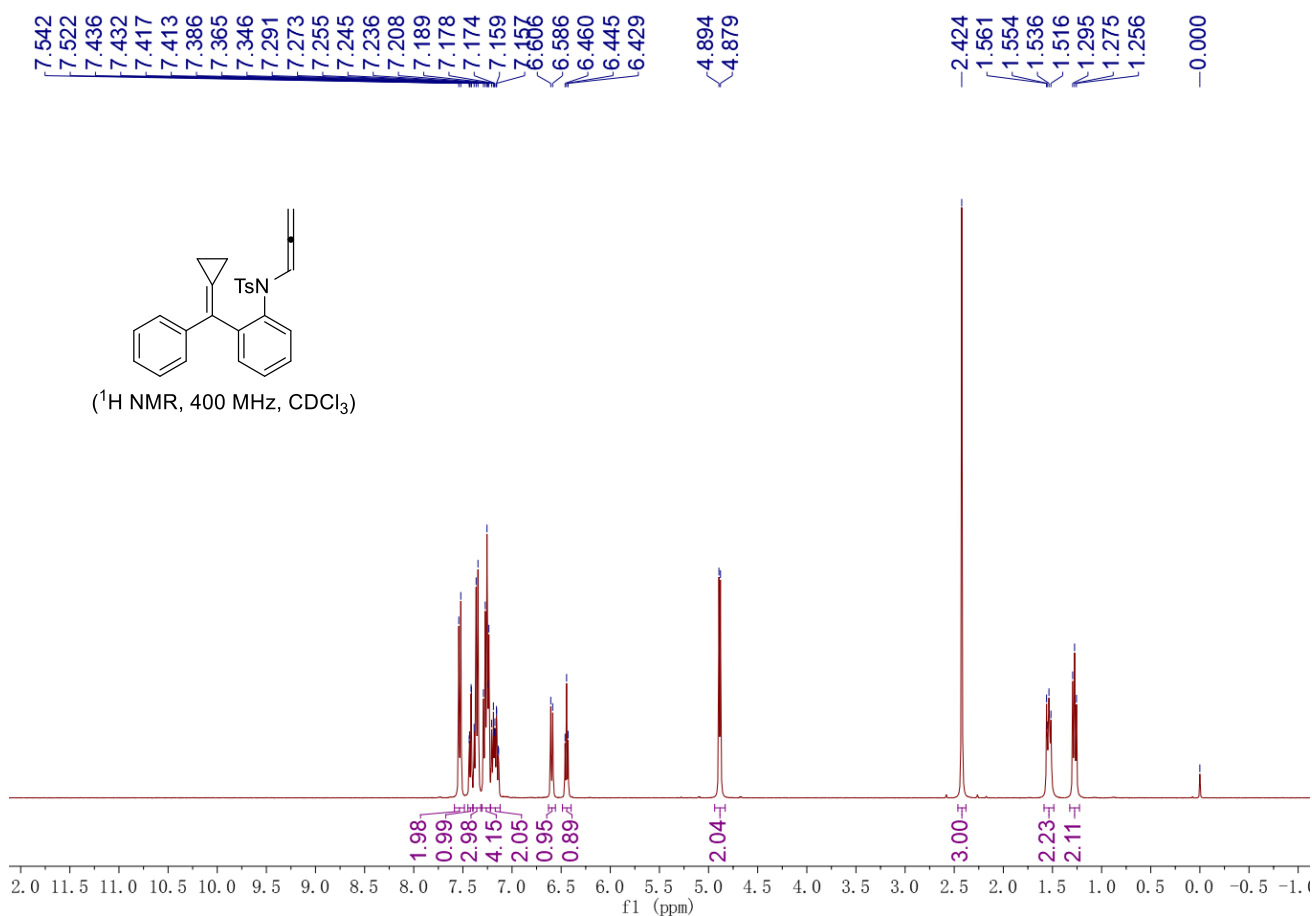

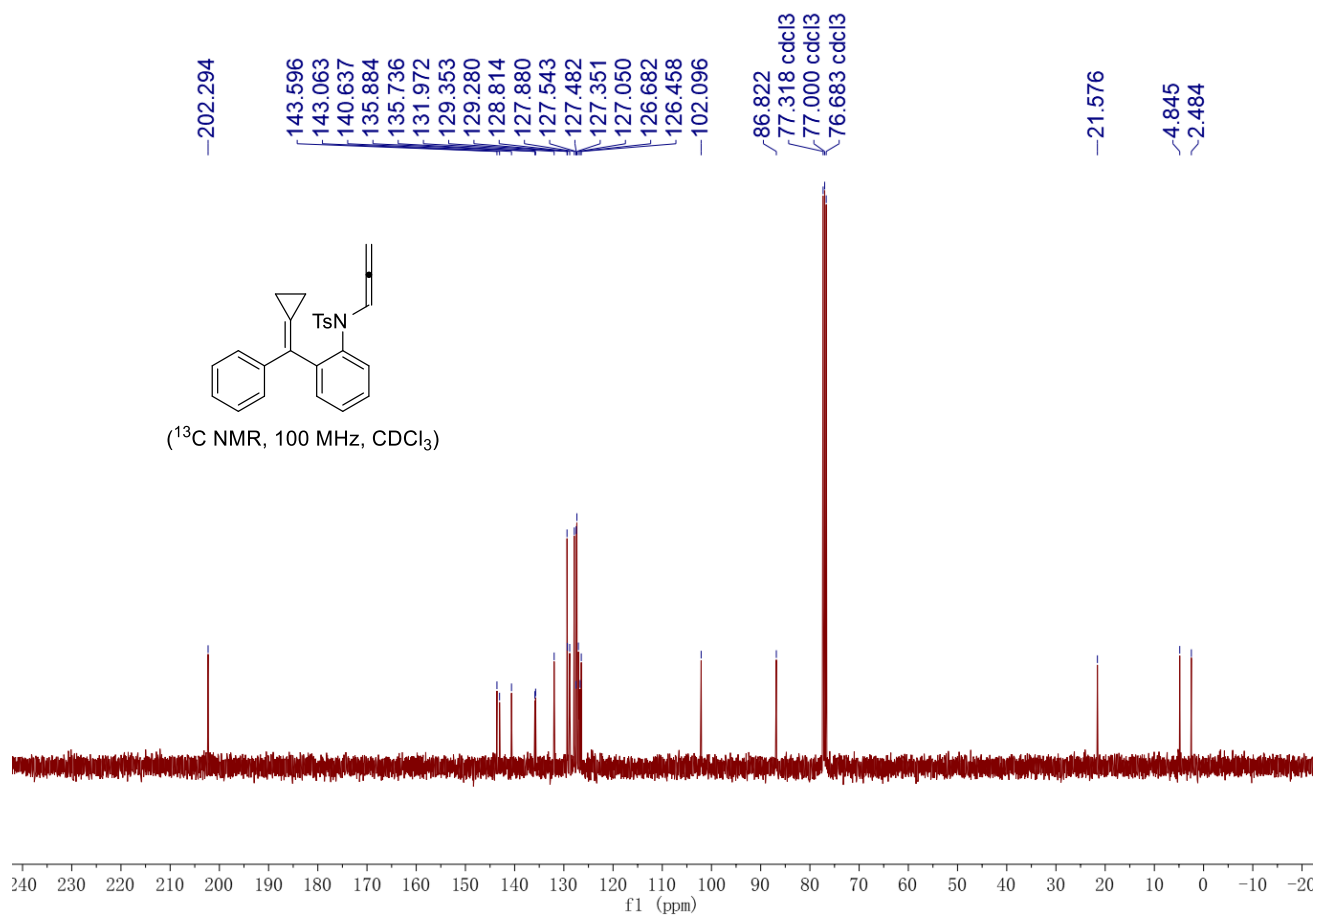

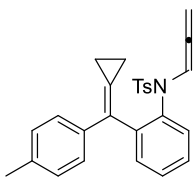

**4-methyl-N-(2-(cyclopropylidene(p-tolyl)methyl)phenyl)-N-(propa-1,2-dien-1-yl)benzenesulfonamide (1b):** Yield: 649 mg, 76%, yellow solid, m.p. 147-149 °C; Eluent: PE/EA = 30/1. <sup>1</sup>H NMR (400 MHz, CDCl<sub>3</sub>, TMS) δ 7.53 (d, *J* = 7.6 Hz, 2H), 7.42 – 7.19 (m, 6H), 7.14 (t, *J* = 7.6 Hz, 1H), 7.07 (d, *J* = 7.6 Hz, 2H), 6.63 (d, *J* = 8.8 Hz, 1H), 6.51 – 6.42 (m, 1H), 4.89 (d, *J* = 6.0 Hz, 2H), 2.40 (s, 3H), 2.31 (s, 3H), 1.56 – 1.45 (m, 2H), 1.30 – 1.20 (m, 2H); <sup>13</sup>C{<sup>1</sup>H}-NMR (100 MHz, CDCl<sub>3</sub>, TMS) δ 202.4, 143.5, 143.1, 137.8, 135.9, 135.8, 131.9, 129.3, 129.2, 128.7, 128.2, 127.8, 127.3, 127.2, 126.9, 125.6, 102.2, 86.7, 21.5, 21.1, 4.8, 2.4; IR (neat): ν 3063, 3019, 2961, 1432, 1356, 1265, 1026, 969, 813, 755 cm<sup>-1</sup>; HRMS (ESI-TOF) Calcd for C<sub>20</sub>H<sub>19</sub>NO<sub>2</sub>Na [M+Na]<sup>+</sup>: 450.14982, found: 450.14998.

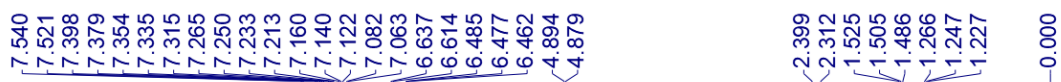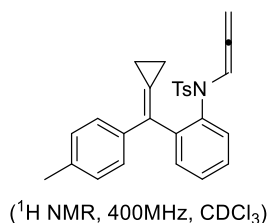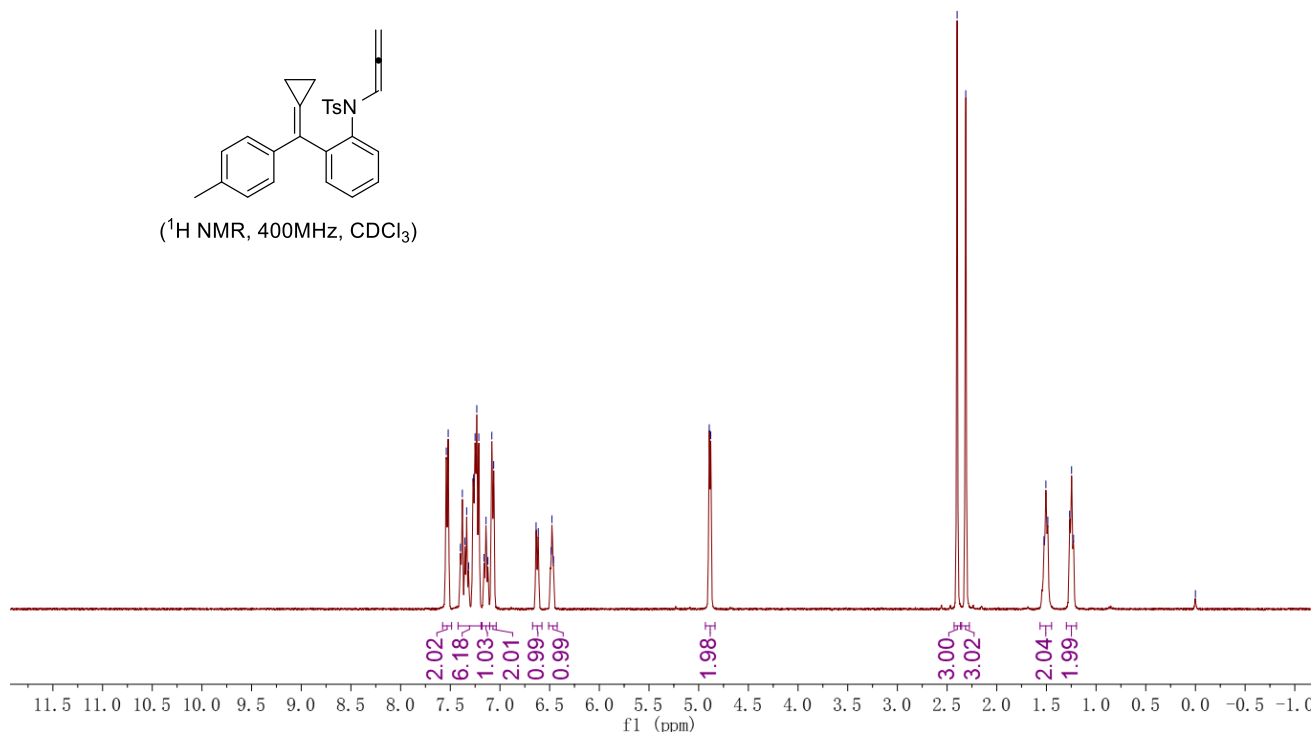

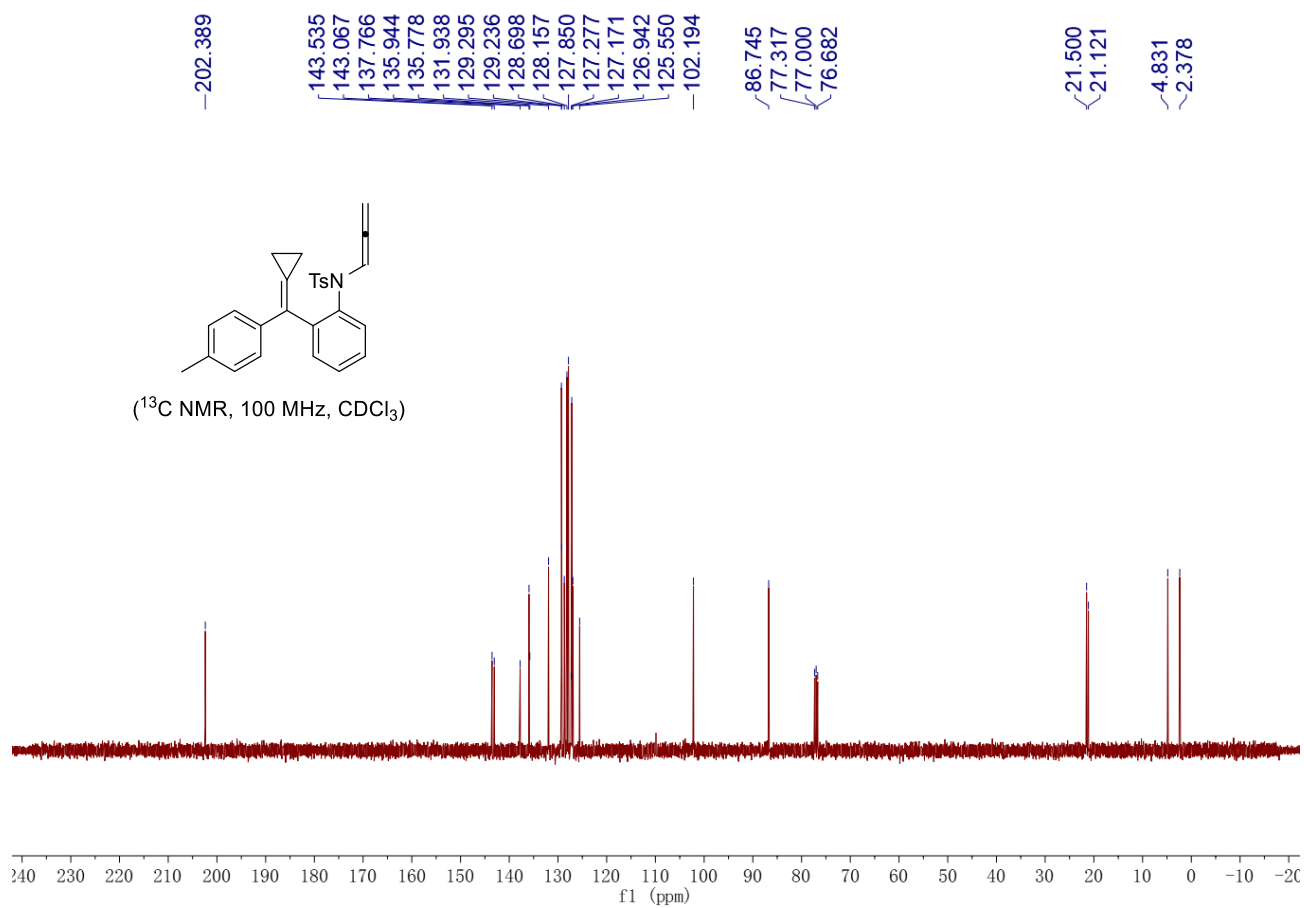



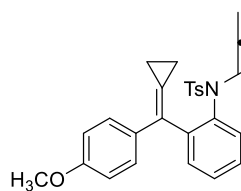

**4-methyl-N-(2-(cyclopropylidene(4-methoxyphenyl)methyl)phenyl)-N-(propa-1,2-dien-1-yl)benzenesulfonamide (1c):** Yield: 718 mg, 81%, yellow solid, m.p. 137-139 °C; Eluent: PE/EA = 30/1. <sup>1</sup>H NMR (400 MHz, CDCl<sub>3</sub>, TMS) δ 7.54 (d, *J* = 8.4 Hz, 2H), 7.43 – 7.20 (m, 7H), 7.15 (td, *J*<sub>1</sub> = 8.0 Hz, *J*<sub>2</sub> = 2.0 Hz, 1H), 6.82 (d, *J* = 8.8 Hz, 2H), 6.62 (d, *J* = 8.0 Hz, 1H), 6.48 (t, *J* = 6.0 Hz, 1H), 4.90 (d, *J* = 6.0 Hz, 2H), 3.79 (s, 3H), 2.43 (s, 3H), 1.54 – 1.46 (m, 2H), 1.29 – 1.21 (m, 2H); <sup>13</sup>C{<sup>1</sup>H}-NMR (100 MHz, CDCl<sub>3</sub>, TMS) δ 202.4, 158.3, 143.6, 143.2, 136.0, 135.9, 133.6, 132.0, 129.3, 128.8, 128.5, 127.9, 127.0, 127.0, 124.7, 112.9, 102.3, 86.8, 55.2, 21.6, 4.8, 2.4; IR (neat): ν 2956, 2912, 2849, 1594, 1509, 1430, 1247, 1026, 969, 818 cm<sup>-1</sup>; HRMS (ESI-TOF) Calcd for C<sub>20</sub>H<sub>19</sub>NO<sub>2</sub>Na [M+Na]<sup>+</sup>: 466.14497, found: 466.14474.

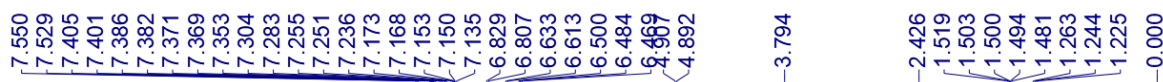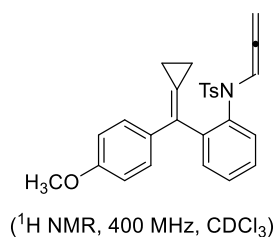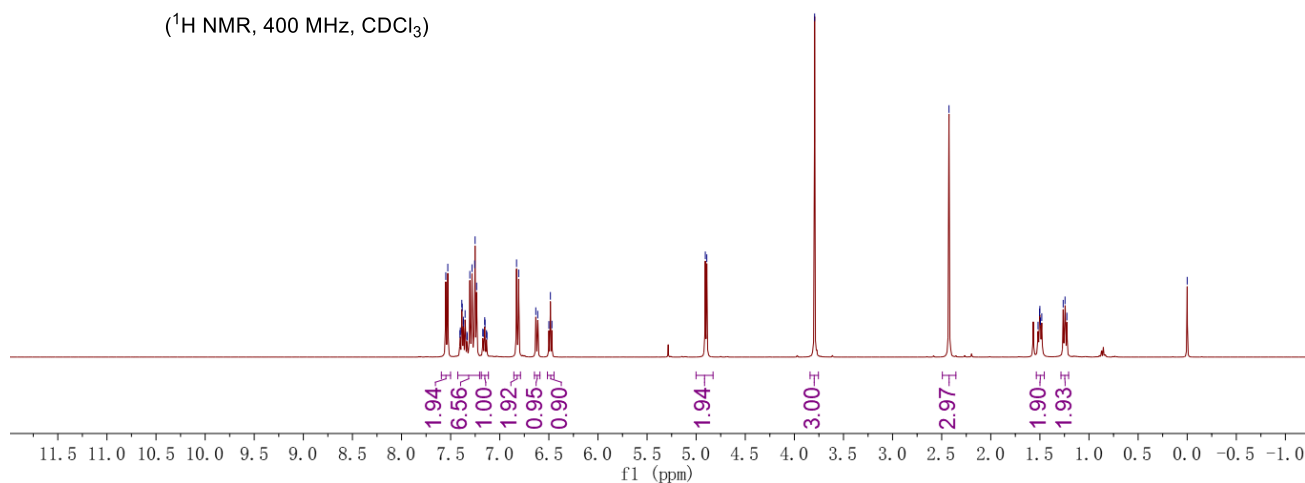

-202.440  
 158.311  
 143.581  
 143.219  
 135.982  
 135.867  
 133.561  
 131.952  
 129.348  
 128.765  
 128.468  
 127.918  
 126.981  
 126.950  
 124.675  
 -112.923  
 -102.257  
 86.795  
 77.320  
 77.001  
 76.684  
 -55.206  
 -21.563  
 4.765  
 -2.431

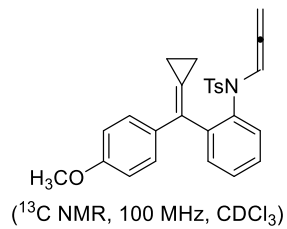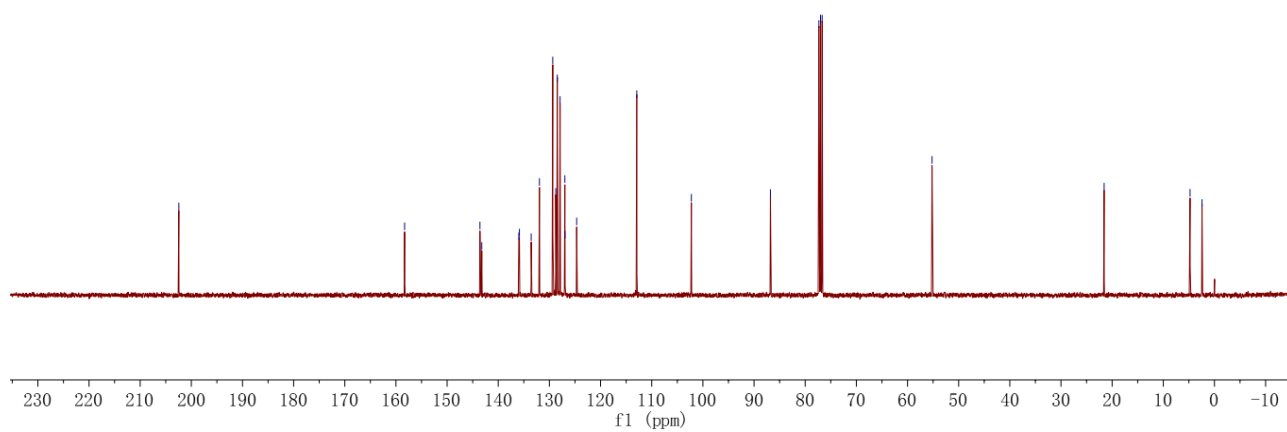

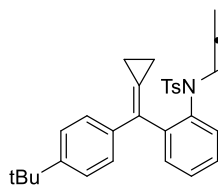

**4-methyl-N-(2-((4-(tert-butyl)phenyl)(cyclopropylidene)methyl)phenyl)-N-(propa-1,2-dien-1-yl)benzenesulfonamide (1d)**: Yield: 778 mg, 83%, yellow oil; Eluent: PE/EA = 30/1.  $^1\text{H}$  NMR (400 MHz,  $\text{CDCl}_3$ , TMS)  $\delta$  7.53 (d,  $J = 8.0$  Hz, 2H), 7.43 – 7.20 (m, 8H), 7.15 (t,  $J = 6.8$  Hz, 1H), 6.62 (d,  $J = 8.0$  Hz, 1H), 6.45 (t,  $J = 6.0$  Hz, 1H), 4.87 (d,  $J = 6.0$  Hz, 2H), 2.42 (s, 3H), 1.55 – 1.47 (m, 2H), 1.24-1.34 (m, 12H);  $^{13}\text{C}\{^1\text{H}\}$ -NMR (100 MHz,  $\text{CDCl}_3$ , TMS)  $\delta$  202.4, 149.2, 143.5, 143.2, 137.8, 136.0, 135.8, 131.9, 129.3, 129.2, 128.7, 127.9, 127.2, 127.0, 127.0, 125.6, 124.3, 102.1, 86.7, 34.4, 31.3, 21.6, 4.8, 2.4; IR (neat):  $\nu$  3037, 2959, 2859, 1445, 1360, 1156, 1090, 963, 813,  $756\text{ cm}^{-1}$ ; HRMS (ESI-TOF) Calcd for  $\text{C}_{20}\text{H}_{19}\text{NO}_2\text{Na}$   $[\text{M}+\text{Na}]^+$ : 492.19677, found: 492.19640.

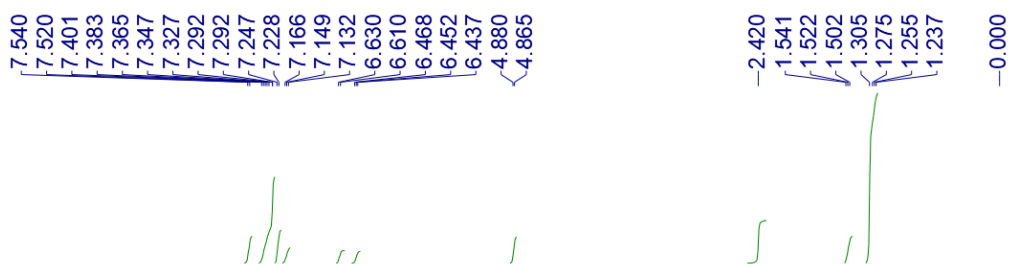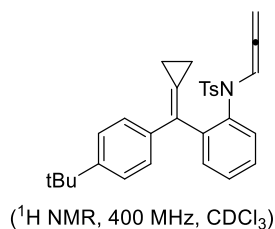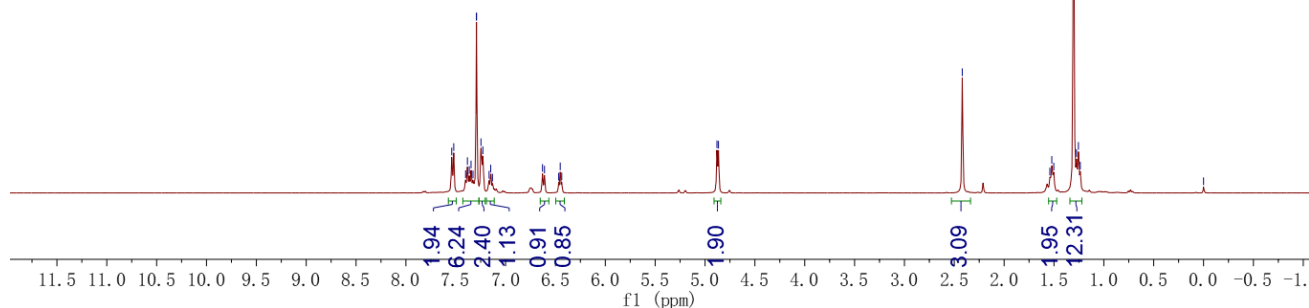

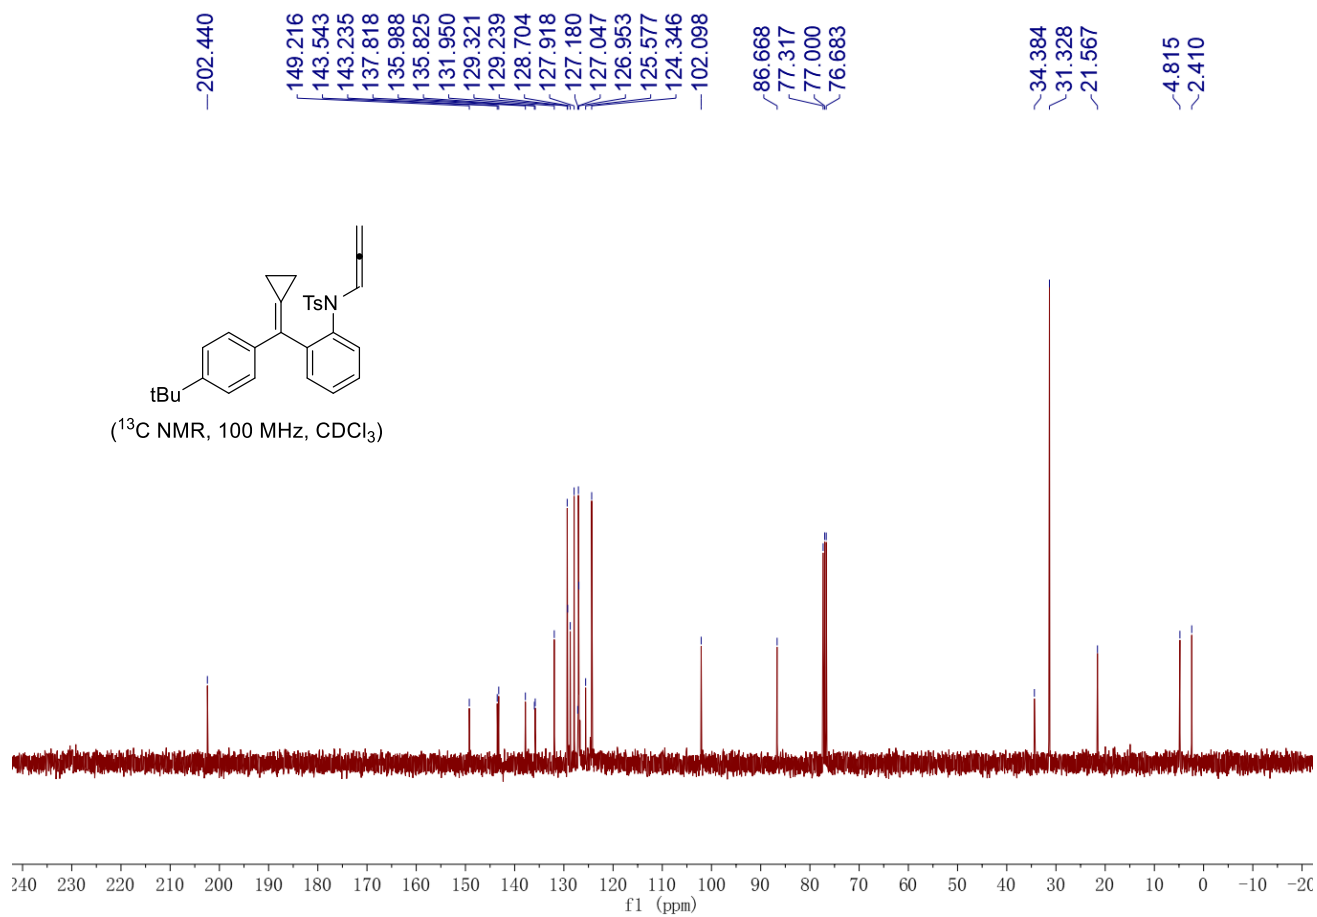

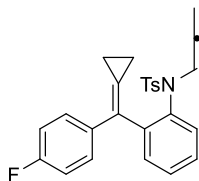

**4-methyl-N-(2-(cyclopropylidene(4-fluorophenyl)methyl)phenyl)-N-(propa-1,2-dien-1-yl)benzenesulfonamide (1e):** Yield: 663 mg, 77%, yellow solid, m.p. 152-154 °C; Eluent: PE/EA = 30/1. <sup>1</sup>H NMR (400 MHz, CDCl<sub>3</sub>, TMS) δ 7.53 (d, *J* = 8.4 Hz, 2H), 7.45 – 7.22 (m, 6H), 7.15 (td, *J*<sub>1</sub> = 8.0 Hz, *J*<sub>2</sub> = 2.0 Hz, 1H), 6.96 (t, *J* = 8.8 Hz, 2H), 6.57 (dd, *J*<sub>1</sub> = 8.0 Hz, *J*<sub>2</sub> = 1.2 Hz, 1H), 6.48 (t, *J* = 6.0 Hz, 1H), 4.90 (d, *J* = 6.0 Hz, 2H), 2.49 – 2.36 (m, 3H), 1.56 – 1.44 (m, 2H), 1.33 – 1.22 (m, 2H); <sup>13</sup>C{<sup>1</sup>H}-NMR (100 MHz, CDCl<sub>3</sub>, TMS) δ 202.1, 161.6 (d, *J* = 243.6 Hz), 143.7, 142.9, 136.9, 136.8, 135.7, 135.6, 131.8, 129.3, 129.3, 128.8 (d, *J* = 5.3 Hz), 127.8, 127.1, 126.6, 126.4 (d, *J* = 1.8 Hz), 114.2 (d, *J* = 21.1 Hz), 102.1, 86.9, 21.5, 4.7, 2.6; <sup>19</sup>F NMR (376 MHz, CDCl<sub>3</sub>) δ -116.3; IR (neat): ν 3066, 3026, 2964, 1594, 1506, 1355, 1261, 1088, 965, 836, 829 cm<sup>-1</sup>; HRMS (ESI-TOF) Calcd for C<sub>20</sub>H<sub>19</sub>NO<sub>2</sub>Na [M+Na]<sup>+</sup>: 454.12475, found: 454.12465.

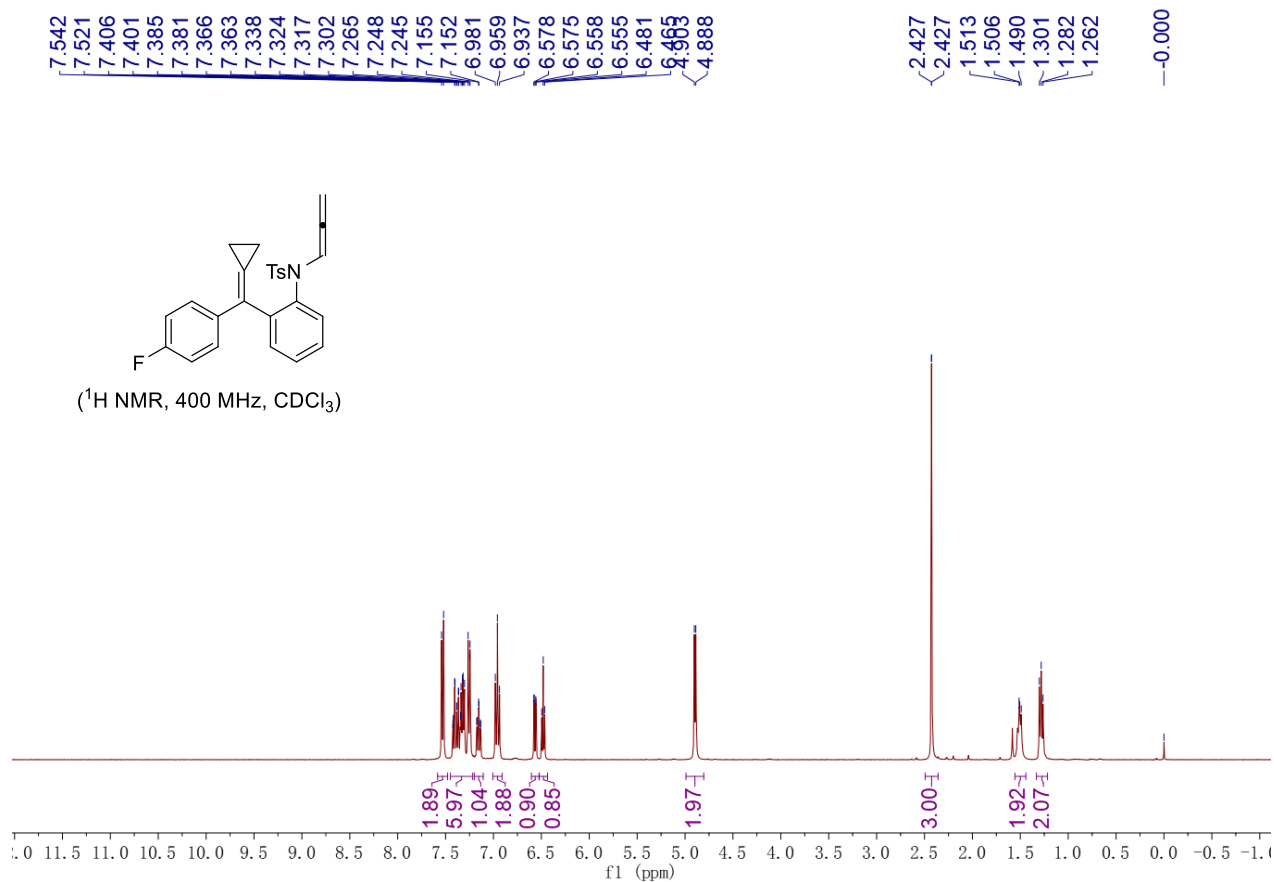

-202.090

162.852  
160.416  
143.683  
142.878  
136.885  
136.853  
135.795  
135.613  
131.806  
129.368  
129.317  
128.888  
128.835  
127.828  
127.147  
126.693  
126.481  
126.463  
114.355  
114.144  
102.100  
86.898  
77.319  
77.000  
76.682

-21.548

-4.698  
-2.640

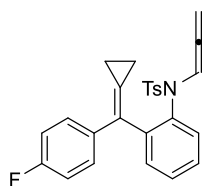

(<sup>13</sup>C NMR, 100 MHz, CDCl<sub>3</sub>)

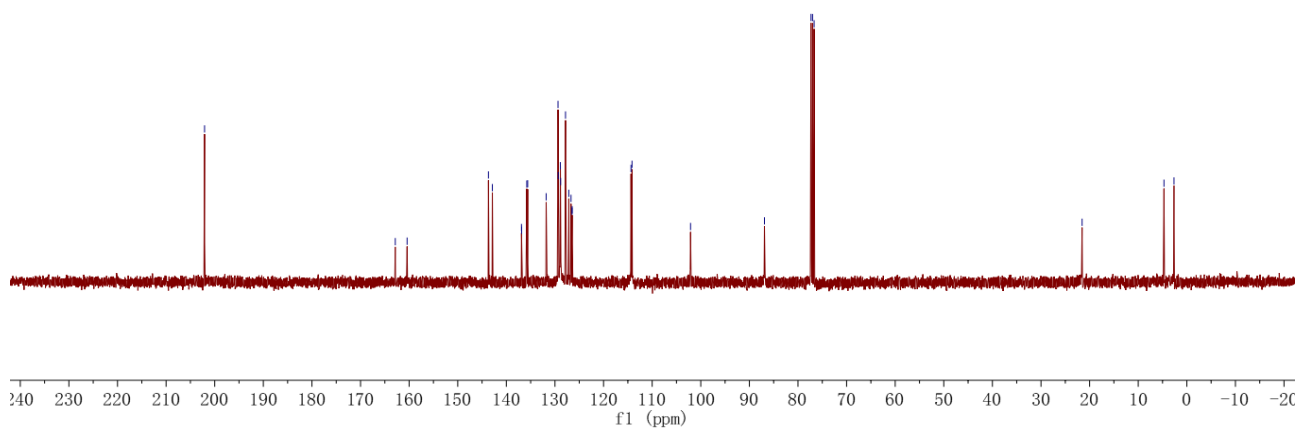

-116.322

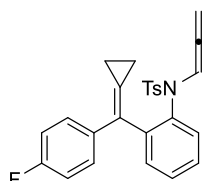

(<sup>19</sup>F NMR, 376 MHz, CDCl<sub>3</sub>)

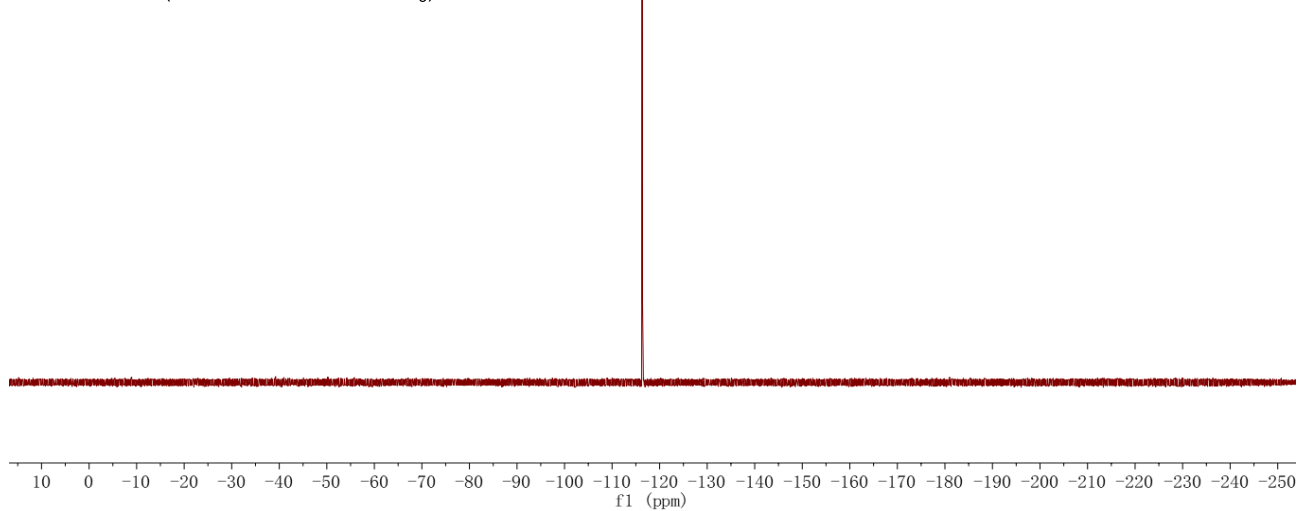

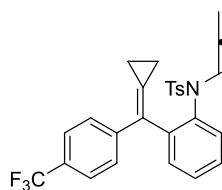

**4-methyl-N-(2-(cyclopropylidene(4-(trifluoromethyl)phenyl)methyl)phenyl)-N-(propa-1,2-dien-1-yl)benzenesulfonamide (1f):** Yield: 702 mg, 73%, yellow oil; Eluent: PE/EA = 30/1.  $^1\text{H}$  NMR (400 MHz,  $\text{CDCl}_3$ , TMS)  $\delta$  7.52 (d,  $J = 8.0$  Hz, 4H), 7.46 (d,  $J = 8.4$  Hz, 2H), 7.44 – 7.35 (m, 2H), 7.29 – 7.23 (m, 3H), 7.18 (td,  $J_1 = 7.6$  Hz,  $J_2 = 2.0$  Hz, 1H), 6.58 (d,  $J = 8.0$  Hz, 1H), 6.45 (t,  $J = 6.0$  Hz, 1H), 4.89 (d,  $J = 6.0$  Hz, 2H), 2.43 (s, 3H), 1.62 – 1.50 (m, 2H), 1.37 – 1.28 (m, 2H);  $^{13}\text{C}\{^1\text{H}\}$ -NMR (100 MHz,  $\text{CDCl}_3$ , TMS)  $\delta$  201.9, 144.2, 143.8, 142.2, 135.8, 135.3, 131.7, 129.4, 129.3, 128.9, 128.1 (q,  $J = 31.9$  Hz), 127.7, 127.4, 127.3, 126.7, 125.7, 124.4 (q,  $J = 270.1$  Hz), 124.3 (q,  $J = 3.5$  Hz), 123.0, 101.9, 86.9, 21.4, 4.9, 2.7;  $^{19}\text{F}$  NMR (376 MHz,  $\text{CDCl}_3$ )  $\delta$  -62.14; IR (neat):  $\nu$  3068, 3036, 2961, 1613, 1479, 1361, 1158, 1069, 662  $\text{cm}^{-1}$ ; HRMS (ESI-TOF) Calcd for  $\text{C}_{20}\text{H}_{19}\text{NO}_2\text{Na}$   $[\text{M}+\text{Na}]^+$ : 504.12156, found: 504.12200.

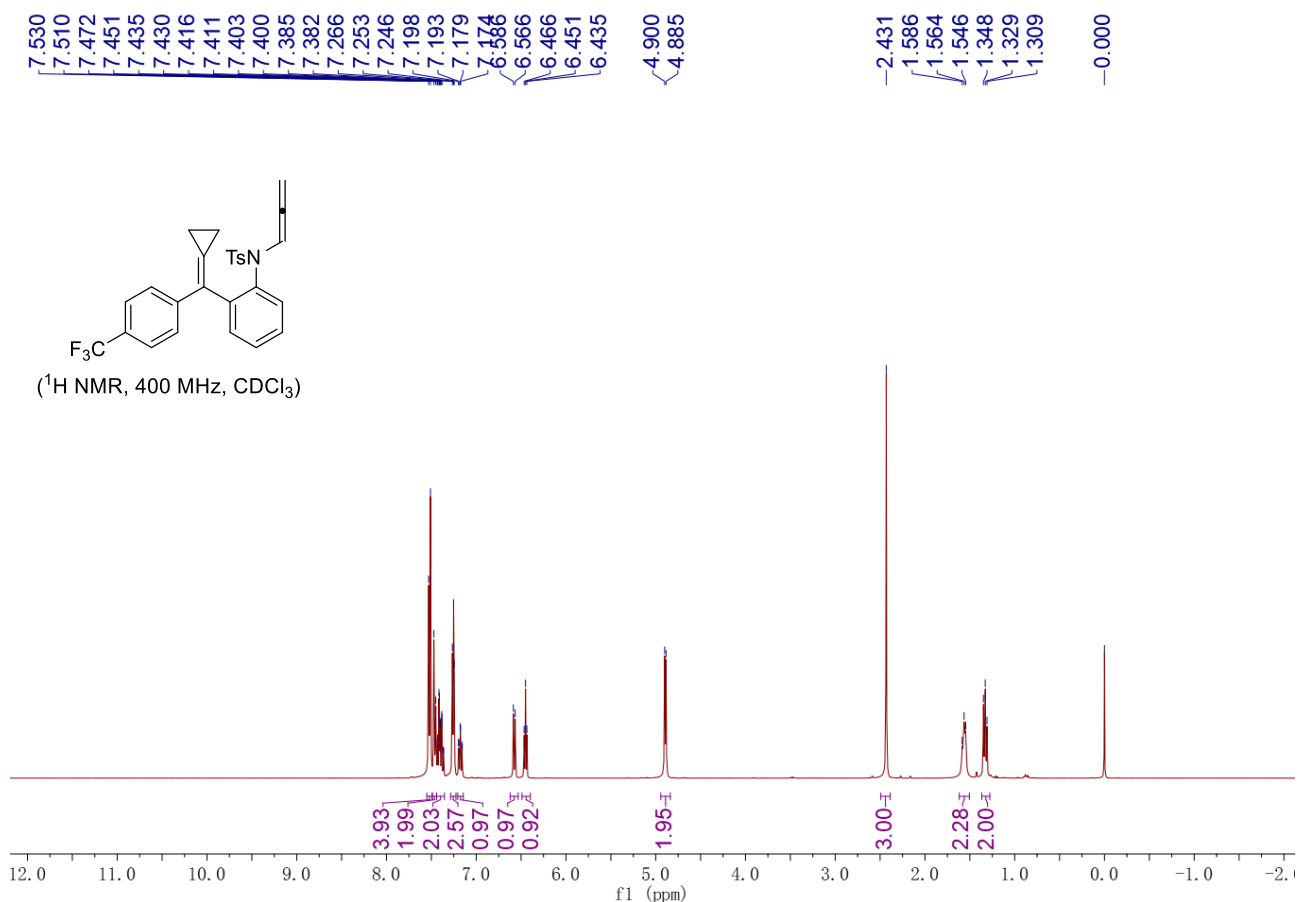

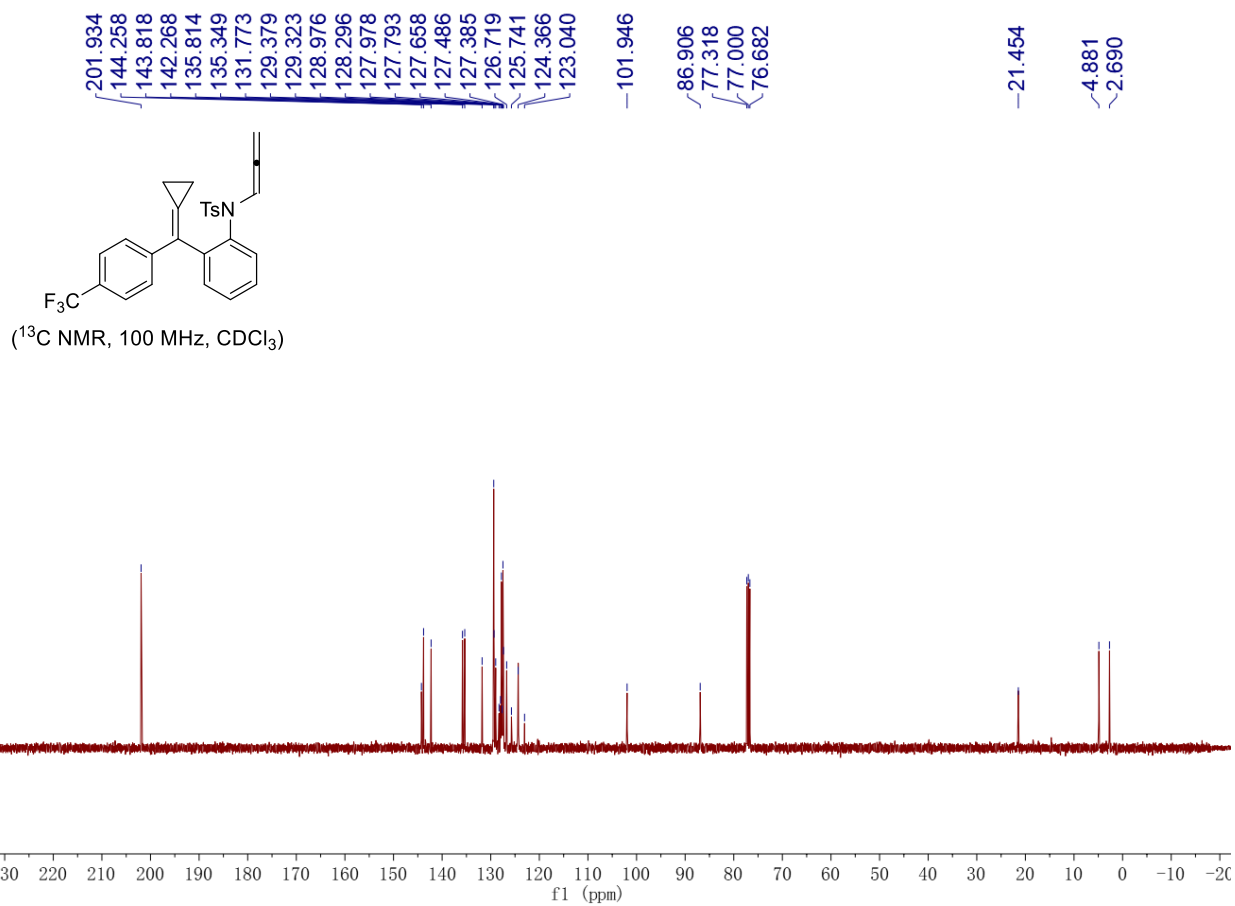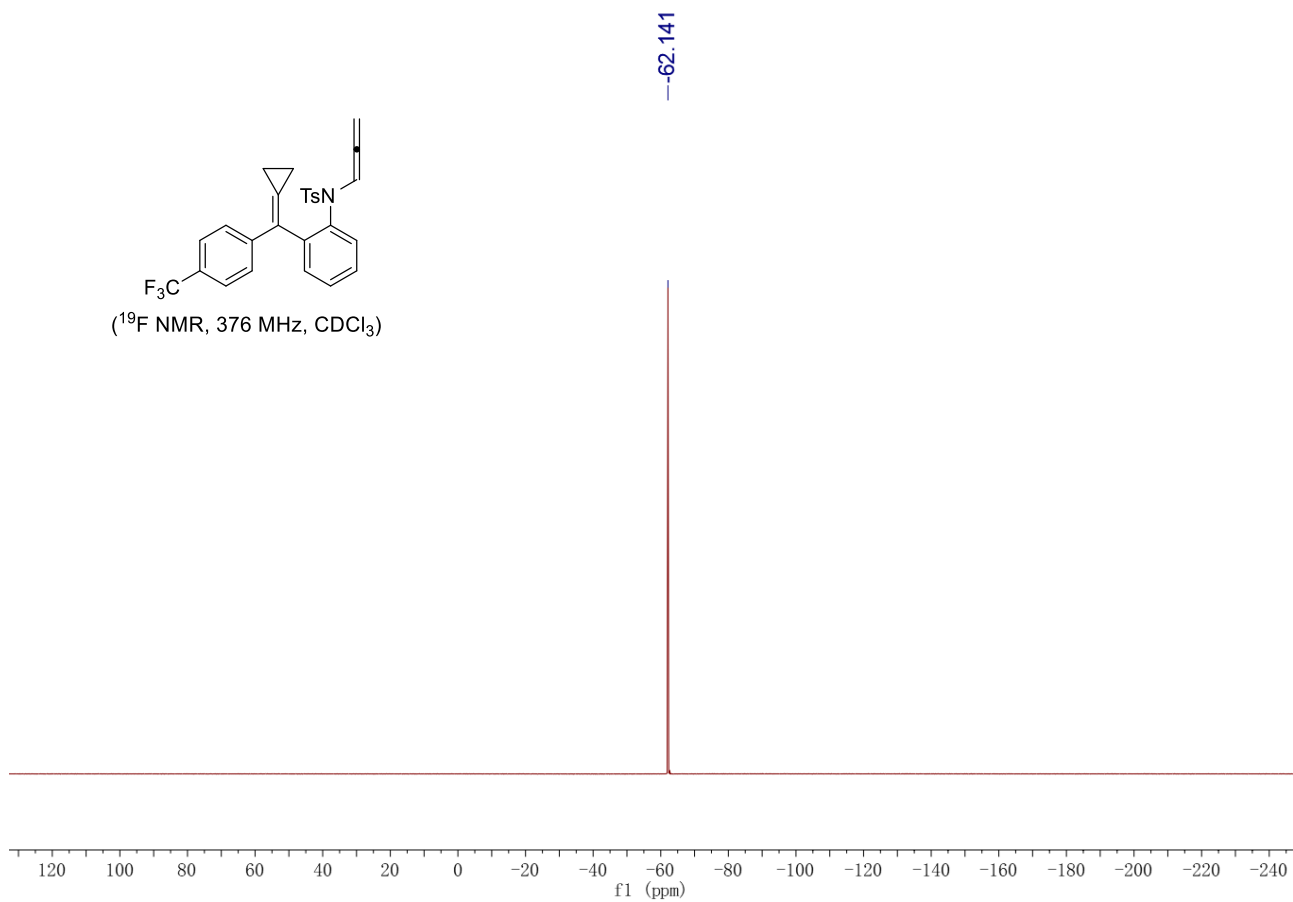



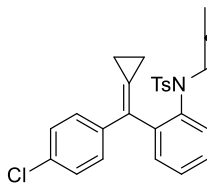

**4-methyl-N-(2-((4-chlorophenyl)(cyclopropylidene)methyl)phenyl)-N-(propa-1,2-dien-1-yl)benzenesulfonamide (1g):** Yield: 706 mg, 79%, yellow solid, m.p. 156-158 °C; Eluent: PE/EA = 30/1. <sup>1</sup>H NMR (400 MHz, CDCl<sub>3</sub>, TMS) δ 7.52 (d, *J* = 8.0 Hz, 2H), 7.43 – 7.33 (m, 2H), 7.32 – 7.20 (m, 6H), 7.16 (td, *J*<sub>1</sub> = 7.6 Hz, *J*<sub>2</sub> = 2.0 Hz, 1H), 6.58 (d, *J* = 8.0 Hz, 1H), 6.49 (t, *J* = 6.0 Hz, 1H), 4.90 (d, *J* = 6.0 Hz, 2H), 2.42 (s, 3H), 1.56 – 1.45 (m, 2H), 1.34 – 1.22 (m, 2H); <sup>13</sup>C{<sup>1</sup>H}-NMR (100 MHz, CDCl<sub>3</sub>, TMS) δ 202.1, 143.7, 142.6, 139.2, 135.8, 135.5, 132.1, 131.8, 129.4, 129.3, 128.9, 128.6, 127.9, 127.6, 127.5, 127.2, 126.6, 102.1, 86.9, 21.6, 4.8, 2.6; IR (neat): ν 3051, 3021, 2961, 1487, 1356, 1149, 1026, 889, 762 cm<sup>-1</sup>; HRMS (ESI-TOF) Calcd for C<sub>20</sub>H<sub>19</sub>NO<sub>2</sub>Na [M+Na]<sup>+</sup>: 470.09520, found: 470.09614.

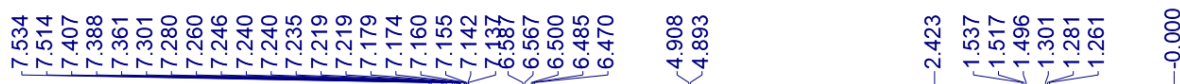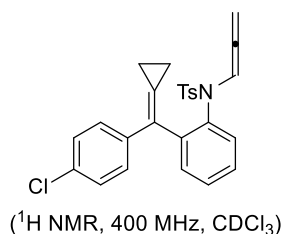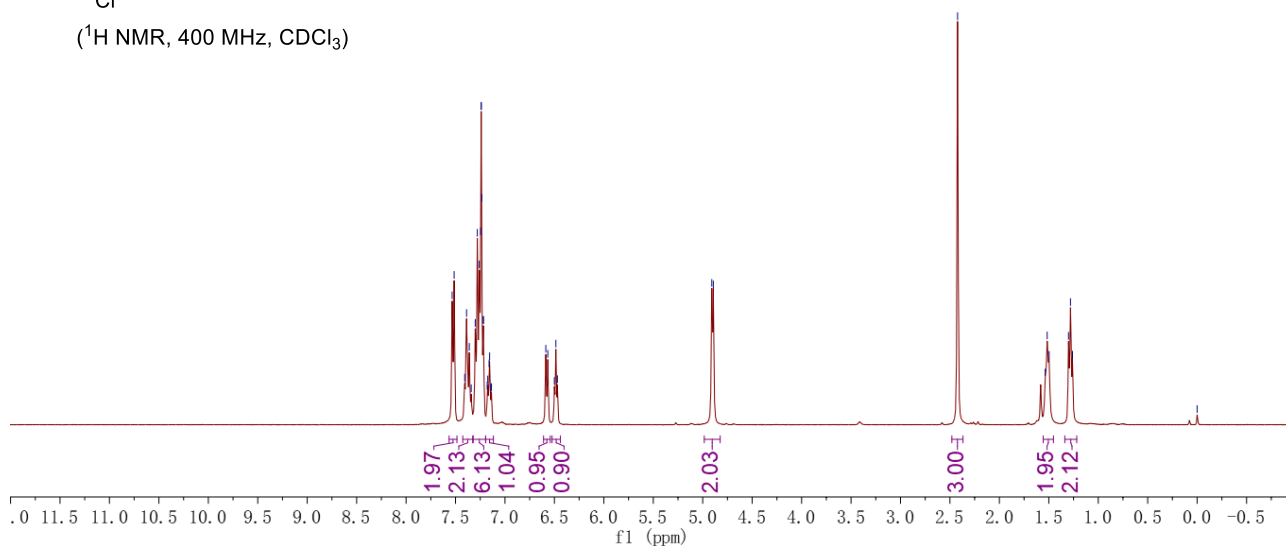

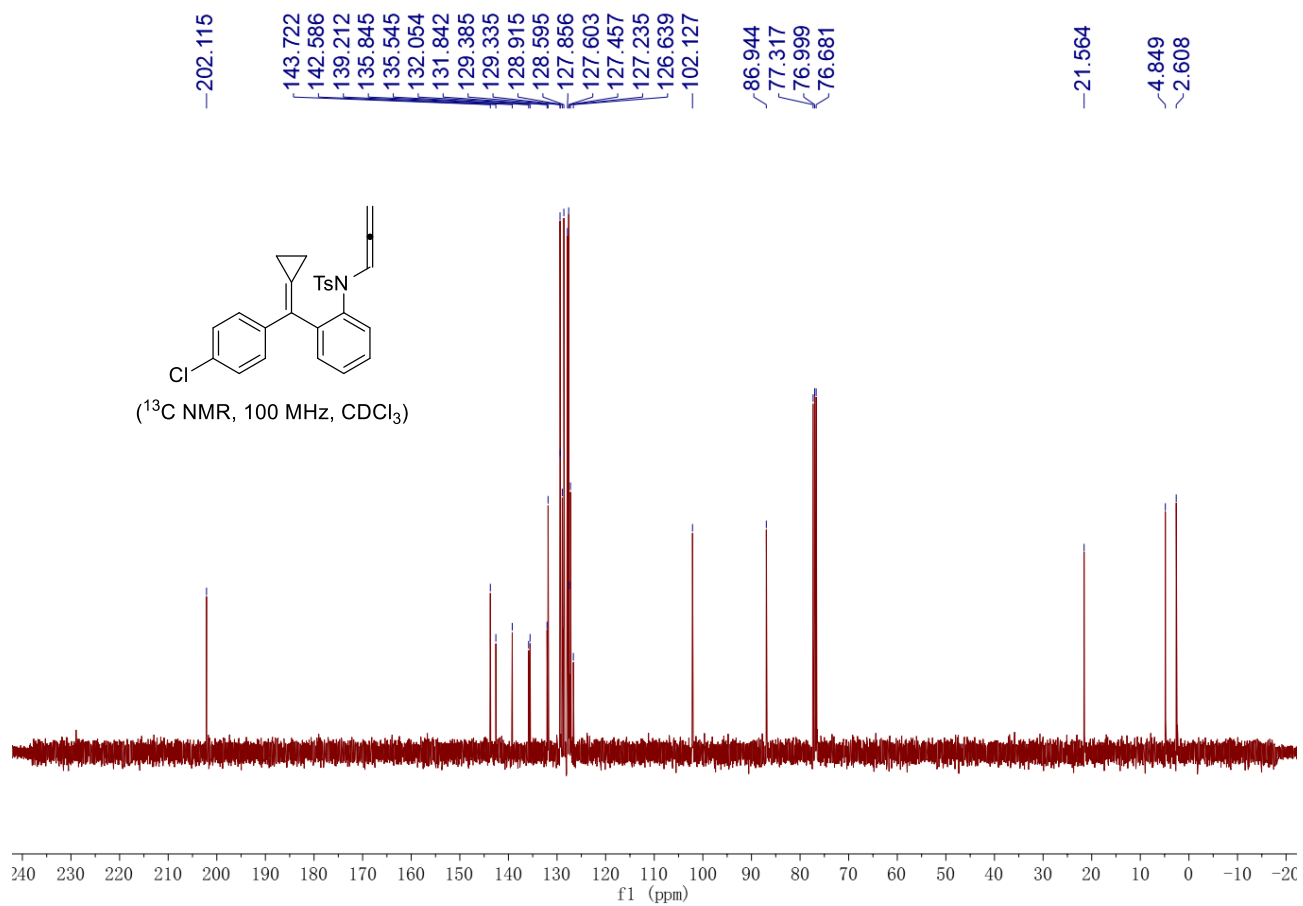

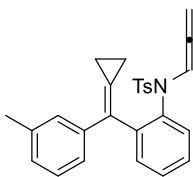

**4-methyl-N-(2-(cyclopropylidene(m-tolyl)methyl)phenyl)-N-(propa-1,2-dien-1-yl)benzenesulfonamide (1h):** Yield: 777 mg, 81%, yellow solid, m.p. 147-149 °C; Eluent: PE/EA = 30/1.  $^1\text{H}$  NMR (400 MHz,  $\text{CDCl}_3$ , TMS)  $\delta$  7.52 (d,  $J = 8.0$  Hz, 2H), 7.41 (dd,  $J_1 = 7.6$  Hz,  $J_2 = 1.6$  Hz, 1H), 7.34 (t,  $J = 7.2$  Hz, 1H), 7.26 – 7.11 (m, 6H), 7.00 (d,  $J = 6.0$  Hz, 1H), 6.61 (d,  $J = 7.6$  Hz, 1H), 6.43 (t,  $J = 6.0$  Hz, 1H), 4.88 (d,  $J = 6.0$  Hz, 2H), 2.39 (s, 3H), 2.29 (s, 3H), 1.55 – 1.46 (m, 2H), 1.30 – 1.21 (m, 2H);  $^{13}\text{C}\{^1\text{H}\}$ -NMR (100 MHz,  $\text{CDCl}_3$ , TMS)  $\delta$  202.3, 143.5, 143.0, 140.5, 136.8, 135.8, 135.7, 131.9, 129.3, 129.2, 128.7, 127.9, 127.8, 127.6, 127.3, 127.1, 126.9, 126.4, 124.6, 102.0, 86.6, 21.5, 4.9, 2.4; IR (neat):  $\nu$  3060, 3018, 2974, 1594, 1484, 1437, 1346, 1157, 1088, 801, 704  $\text{cm}^{-1}$ ; HRMS (ESI-TOF) Calcd for  $\text{C}_{20}\text{H}_{19}\text{NO}_2\text{Na}$   $[\text{M}+\text{Na}]^+$ : 450.14982, found: 450.15039.

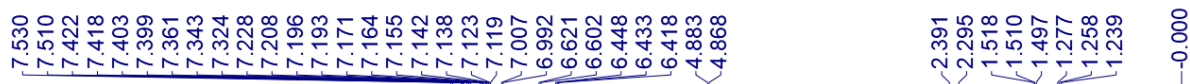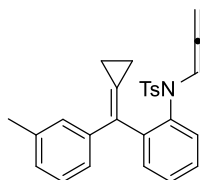

( $^1\text{H}$  NMR, 400 MHz,  $\text{CDCl}_3$ )

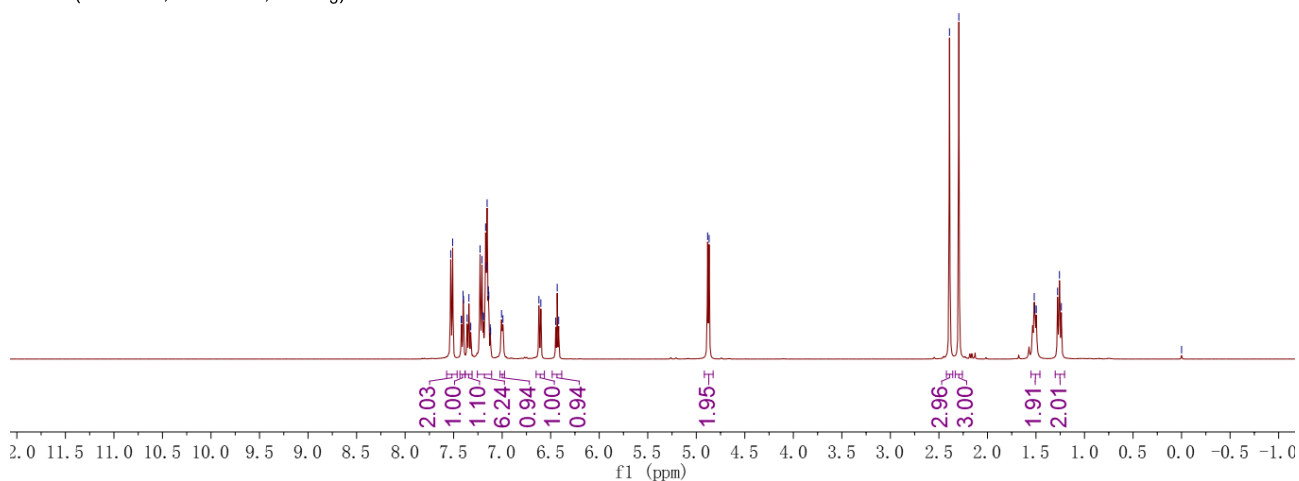

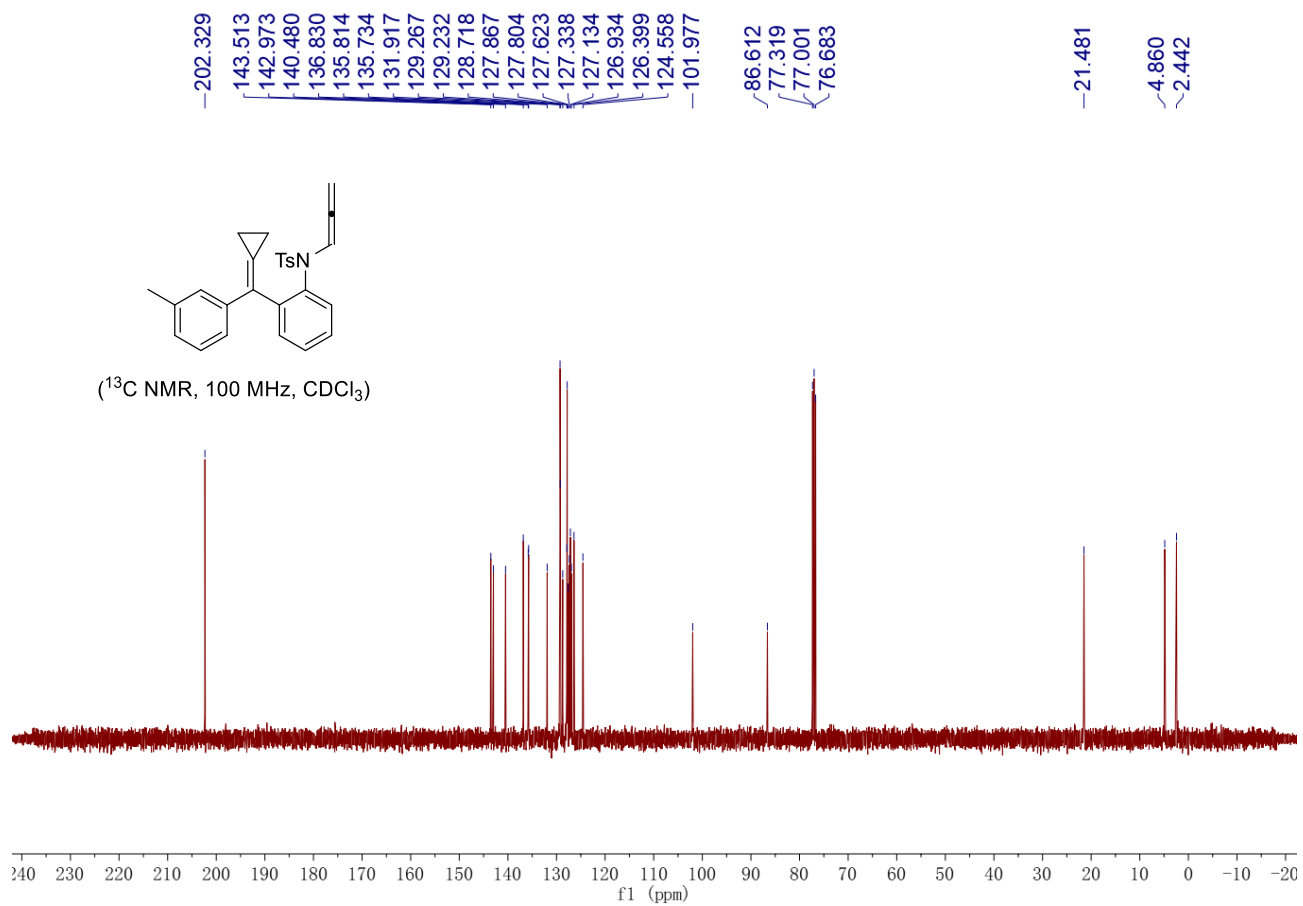

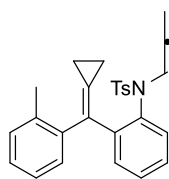

**4-methyl-N-(2-(cyclopropylidene(o-tolyl)methyl)phenyl)-N-(propa-1,2-dien-1-yl)benzenesulfonamide (1i):** Yield: 649 mg, 76%, yellow solid, m.p. 161-163 °C; Eluent: PE/EA = 30/1.  $^1\text{H}$  NMR (400 MHz,  $\text{CDCl}_3$ , TMS)  $\delta$  7.60 (d,  $J = 7.6$  Hz, 1H), 7.50 (d,  $J = 8.0$  Hz, 2H), 7.34 (t,  $J = 7.6$  Hz, 1H), 7.30 – 7.19 (m, 3H), 7.18 – 7.07 (m, 3H), 7.03 (t,  $J = 7.6$  Hz, 1H), 6.31 (t,  $J = 5.6$  Hz, 1H), 6.27 (d,  $J = 8.0$  Hz, 1H), 4.79 (m, 1H), 4.68 (m, 1H), 2.41 (s, 3H), 2.13 (s, 3H), 1.51 – 1.16 (m, 4H);  $^{13}\text{C}\{^1\text{H}\}$ -NMR (100 MHz,  $\text{CDCl}_3$ , TMS)  $\delta$  201.5, 144.2, 143.5, 140.6, 136.1, 135.7, 134.8, 131.8, 130.4, 129.7, 129.3, 129.2, 128.9, 128.8, 128.6, 127.8, 126.6, 126.5, 124.8, 101.7, 86.8, 21.5, 20.9, 4.3, 3.9; IR (neat):  $\nu$  3050, 2979, 2906, 1594, 1482, 1353, 1165, 1089, 764, 722  $\text{cm}^{-1}$ ; HRMS (ESI-TOF) Calcd for  $\text{C}_{20}\text{H}_{19}\text{NO}_2\text{Na}$   $[\text{M}+\text{Na}]^+$ : 450.14982, found: 450.15064.

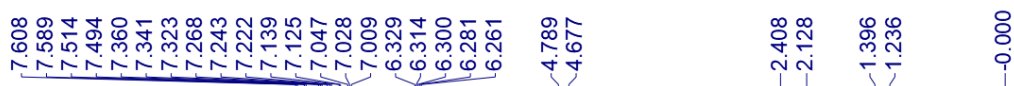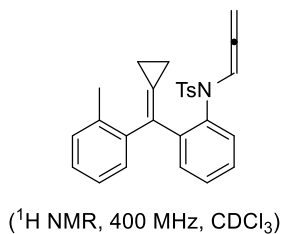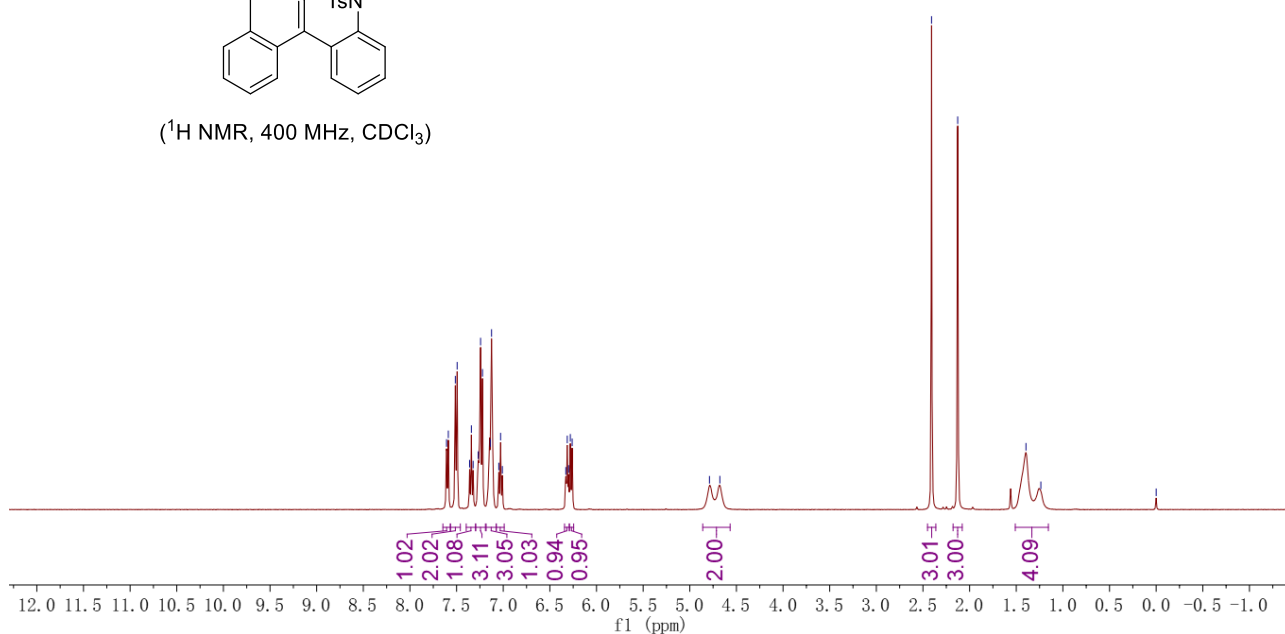

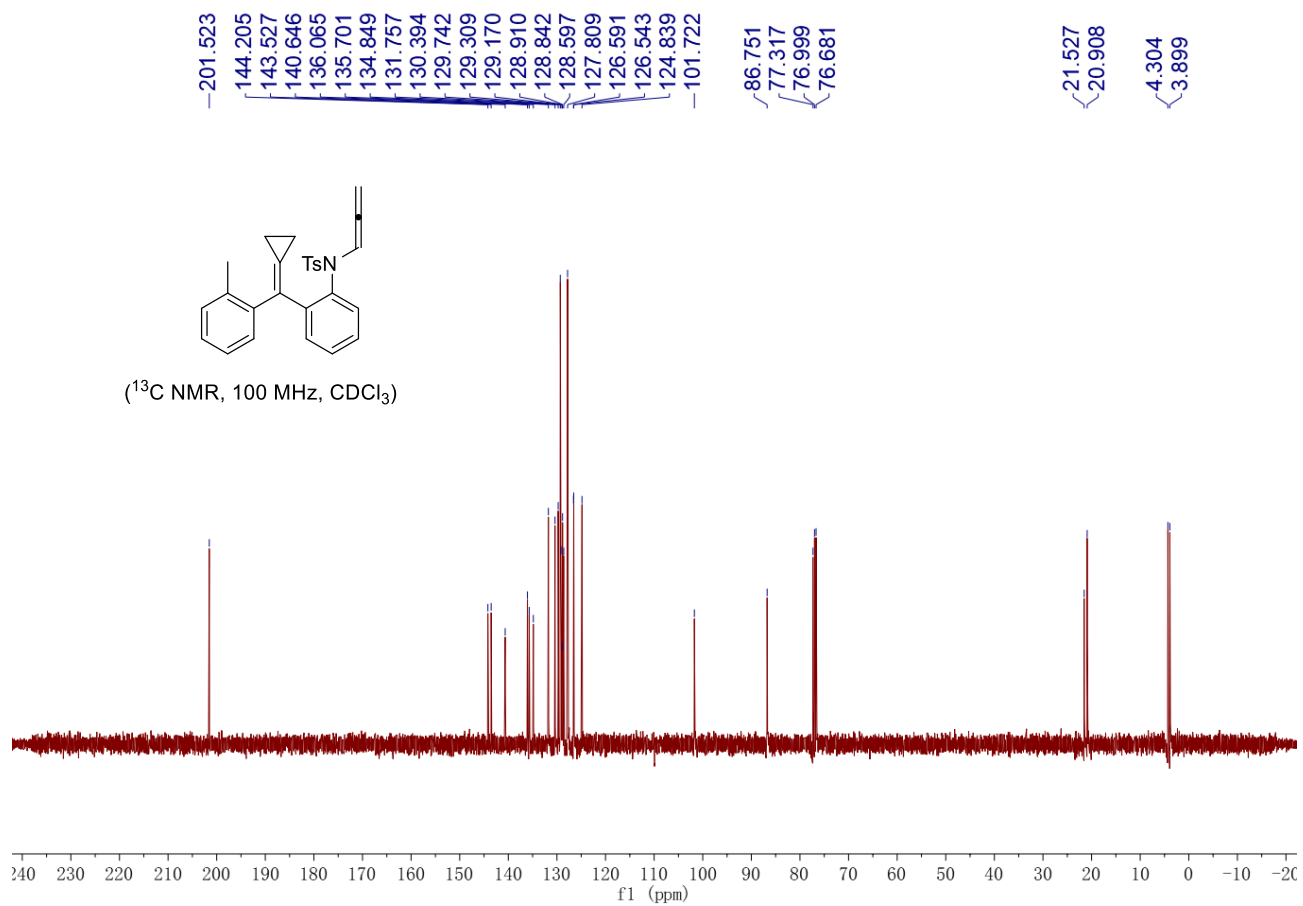

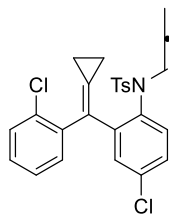

**4-methyl-N-(4-chloro-2-((2-chlorophenyl)(cyclopropylidene)methyl)phenyl)-N-(propa-1,2-dien-1-yl)benzenesulfonamide (1j):** Yield: 692 mg, 72%, yellow solid, m.p. 160-162 °C; Eluent: PE/EA = 30/1. <sup>1</sup>H NMR (400 MHz, CDCl<sub>3</sub>, TMS) δ 7.65 (d, *J* = 2.8 Hz, 1H), 7.58 (d, *J* = 7.6 Hz, 1H), 7.49 (d, *J* = 8.4 Hz, 2H), 7.32 (t, *J* = 7.2 Hz, 1H), 7.29 – 7.16 (m, 4H), 7.00 (dd, *J*<sub>1</sub> = 8.4 Hz, *J*<sub>2</sub> = 2.4 Hz, 1H), 6.27 (t, *J* = 6.0 Hz, 1H), 6.16 (d, *J* = 8.4 Hz, 1H), 4.94 – 4.77 (m, 2H), 2.42 (s, 3H), 1.58 – 1.18 (m, 4H); <sup>13</sup>C{<sup>1</sup>H}-NMR (100 MHz, CDCl<sub>3</sub>, TMS) δ 201.0, 144.8, 143.8, 139.3, 135.2, 134.5, 132.9, 132.8, 132.7, 132.1, 131.9, 130.2, 129.4, 128.9, 128.2, 127.7, 126.8, 126.6, 126.3, 101.2, 87.5, 21.6, 4.4, 3.9; IR (neat): ν 3047, 2984, 1600, 1476, 1440, 1355, 1165, 1086, 1025, 884, 782 cm<sup>-1</sup>; HRMS (ESI-TOF) Calcd for C<sub>20</sub>H<sub>19</sub>NO<sub>2</sub>Na [M+Na]<sup>+</sup>: 504.05623, found: 504.05686.

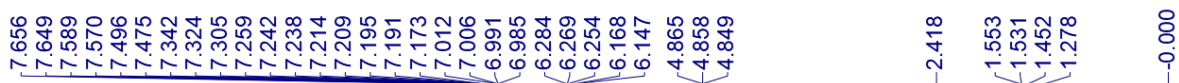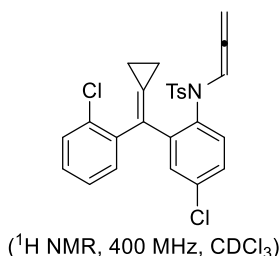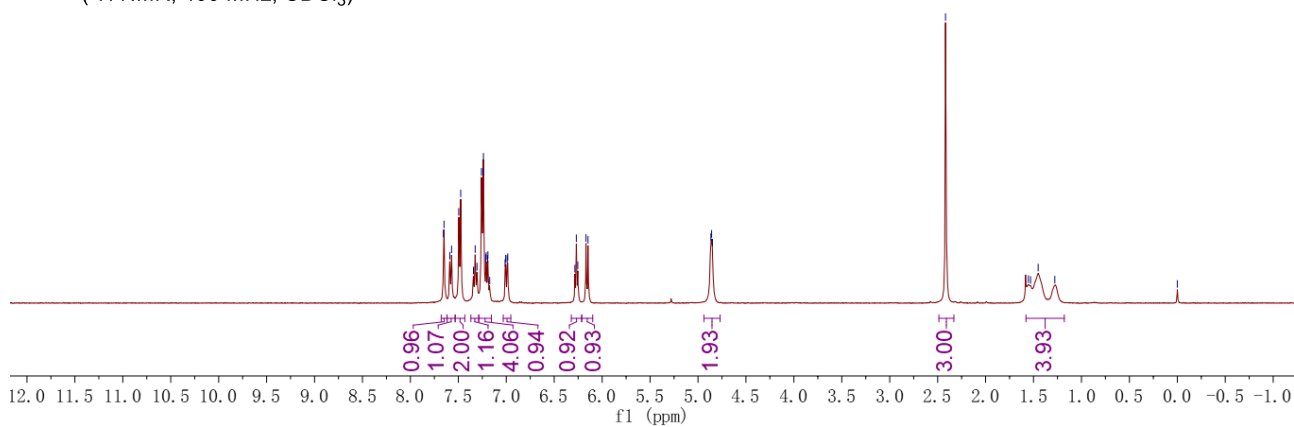

201.024  
 144.781  
 143.840  
 139.329  
 135.233  
 134.520  
 132.917  
 132.825  
 132.739  
 132.113  
 131.926  
 130.156  
 129.447  
 128.863  
 128.200  
 127.744  
 126.775  
 126.578  
 126.313  
 101.234  
 87.519  
 77.319  
 77.001  
 76.683  
 21.584  
 4.382  
 3.936

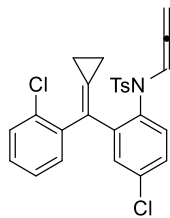

(<sup>13</sup>C NMR, 100 MHz, CDCl<sub>3</sub>)

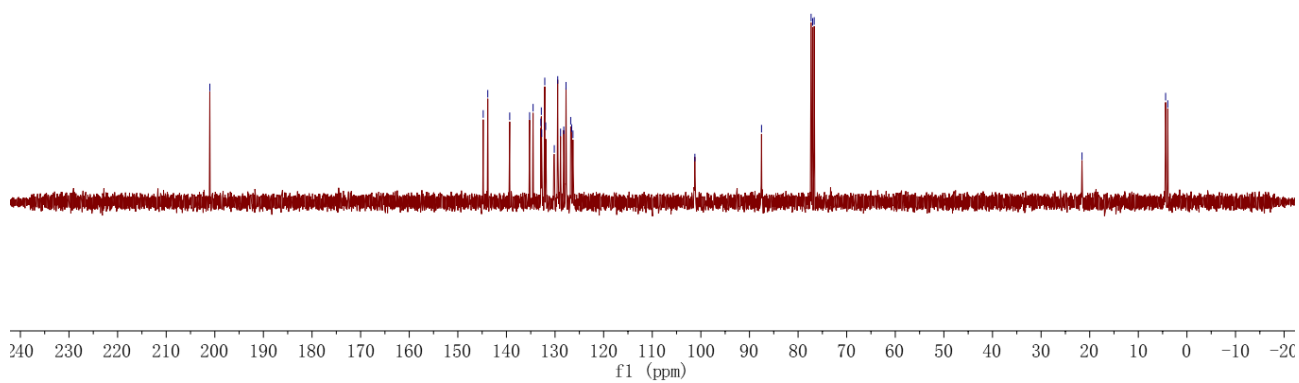



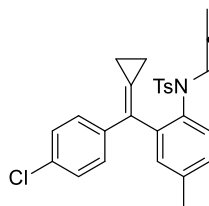

**4-methyl-N-(2-((4-chlorophenyl)(cyclopropylidene)methyl)-4-methylphenyl)-N-(propa-1,2-dien-1-yl)benzenesulfonamide (1k):** Yield: 710 mg, 77%, yellow solid, m.p. 161-163 °C; Eluent: PE/EA = 30/1. <sup>1</sup>H NMR (400 MHz, CDCl<sub>3</sub>, TMS) δ 7.53 (d, *J* = 8.0 Hz, 2H), 7.30 (d, *J* = 8.0 Hz, 2H), 7.27 – 7.16 (m, 5H), 6.95 (d, *J* = 8.0 Hz, 1H), 6.49 (t, *J* = 6.0 Hz, 1H), 6.45 (d, *J* = 8.0 Hz, 1H), 4.90 (d, *J* = 6.0 Hz, 2H), 2.42 (s, 3H), 2.35 (s, 3H), 1.56 – 1.45 (m, 2H), 1.33 – 1.24 (m, 2H); <sup>13</sup>C{<sup>1</sup>H}-NMR (100 MHz, CDCl<sub>3</sub>, TMS) δ 202.1, 143.6, 142.2, 139.3, 138.9, 135.6, 133.1, 132.4, 132.0, 129.3, 129.0, 128.6, 128.0, 127.8, 127.6, 127.1, 126.6, 102.2, 86.9, 21.5, 21.2, 4.8, 2.6; IR (neat): ν 3055, 2964, 2922, 1589, 1488, 1363, 1166, 1089, 963, 829, 797 cm<sup>-1</sup>; HRMS (ESI-TOF) Calcd for C<sub>20</sub>H<sub>19</sub>NO<sub>2</sub>Na [M+Na]<sup>+</sup>: 484.11085, found: 484.11173.

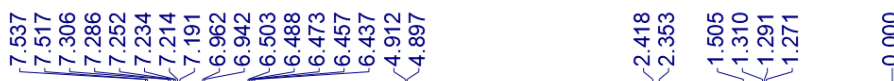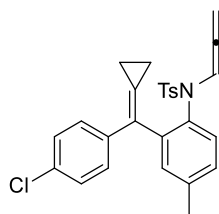

(<sup>1</sup>H NMR, 400 MHz, CDCl<sub>3</sub>)

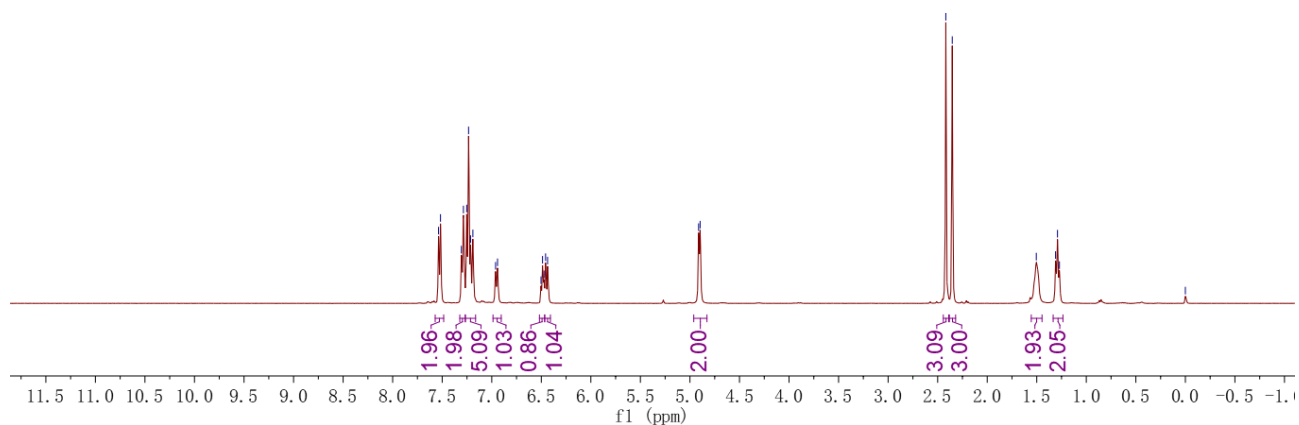

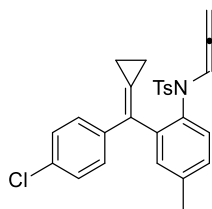

(<sup>13</sup>C NMR, 100 MHz, CDCl<sub>3</sub>)

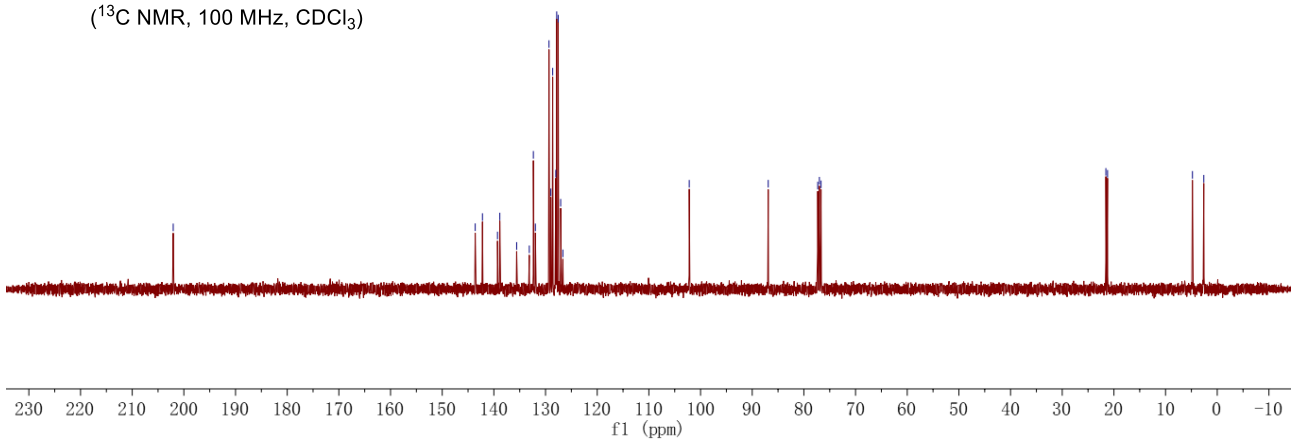

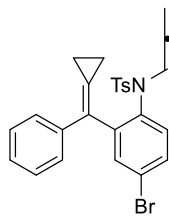

**4-methyl-N-(4-bromo-2-(cyclopropylidene(phenyl)methyl)phenyl)-N-(propa-1,2-dien-1-yl)benzenesulfonamide (11):** Yield: 815 mg, 83%, yellow solid, m.p. 168-170 °C; Eluent: PE/EA = 30/1.  $^1\text{H}$  NMR (400 MHz,  $\text{CDCl}_3$ , TMS)  $\delta$  7.58 (d,  $J = 2.4$  Hz, 1H), 7.51 (d,  $J = 8.0$  Hz, 2H), 7.37 – 7.16 (m, 8H), 6.42 (d,  $J = 8.0$  Hz, 1H), 6.41 (t,  $J = 6.4$  Hz, 1H), 4.91 (d,  $J = 6.4$  Hz, 2H), 2.42 (s, 3H), 1.59 – 1.48 (m, 2H), 1.35 – 1.24 (m, 2H);  $^{13}\text{C}\{^1\text{H}\}$ -NMR (100 MHz,  $\text{CDCl}_3$ , TMS)  $\delta$  202.0, 145.2, 143.9, 140.0, 135.3, 135.0, 134.8, 130.8, 130.2, 129.5, 127.8, 127.8, 127.6, 127.3, 126.7, 126.6, 122.7, 101.9, 87.2, 21.6, 4.9, 2.6; IR (neat):  $\nu$  3057, 2966, 2924, 1594, 1479, 1440, 1359, 1270, 1166, 967, 760  $\text{cm}^{-1}$ ; HRMS (ESI-TOF) Calcd for  $\text{C}_{20}\text{H}_{19}\text{NO}_2\text{Na}$   $[\text{M}+\text{Na}]^+$ : 514.04468, found: 514.04478.

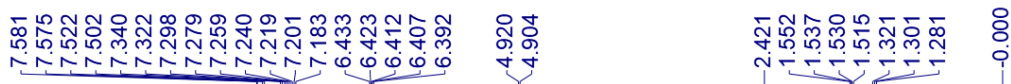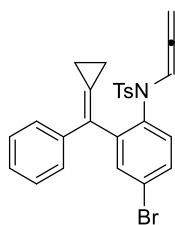

( $^1\text{H}$  NMR, 400 MHz,  $\text{CDCl}_3$ )

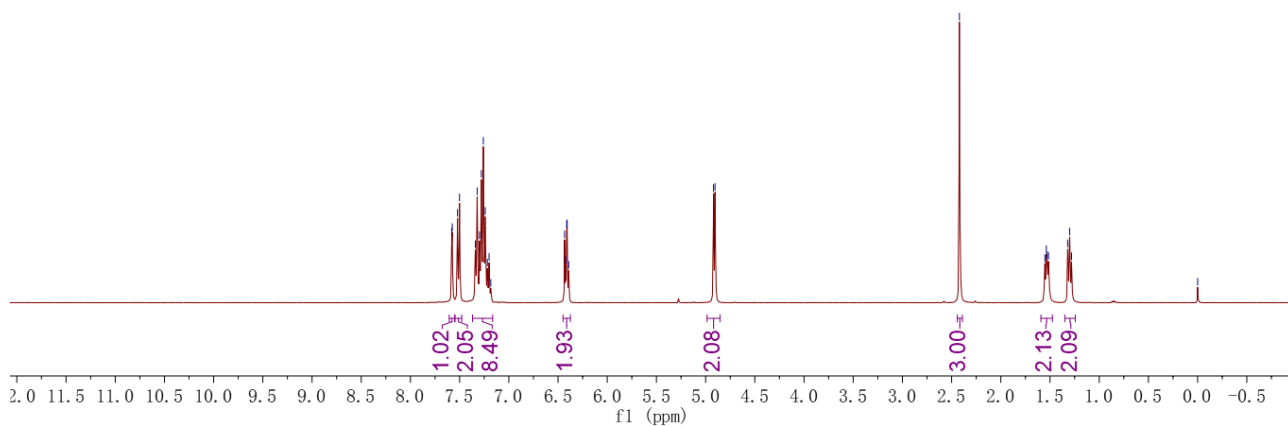

145.212  
143.856  
140.019  
135.338  
134.997  
134.763  
130.833  
130.184  
129.455  
127.846  
127.801  
127.574  
127.312  
126.693  
126.643  
122.740  
-101.866  
87.222  
77.317  
76.998  
76.681  
-21.578  
4.871  
2.615

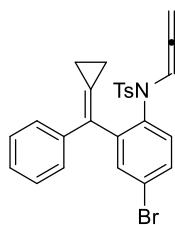

(<sup>13</sup>C NMR, 100 MHz, CDCl<sub>3</sub>)

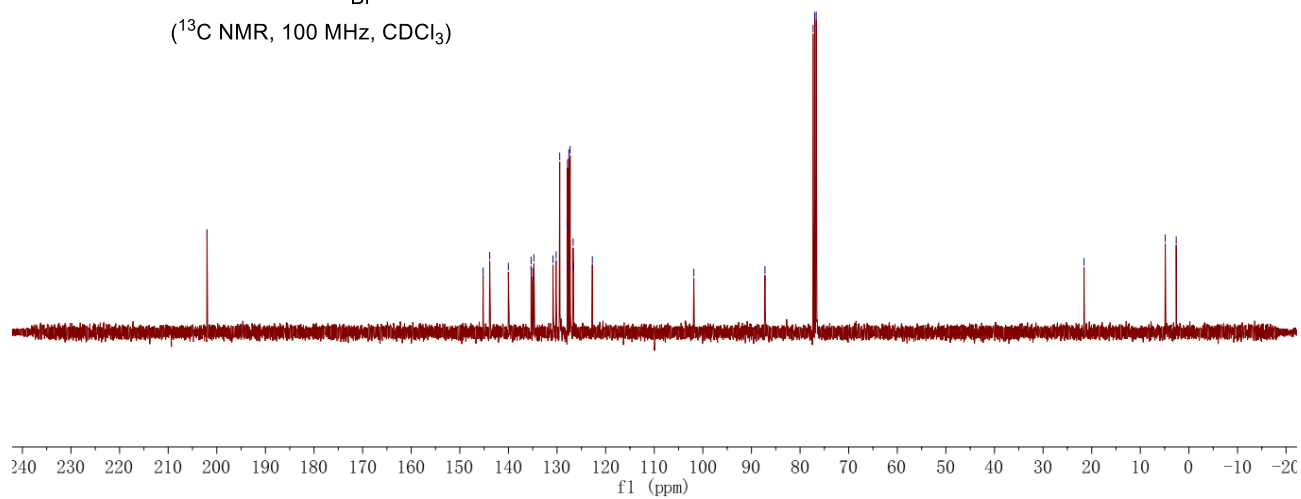

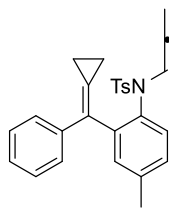

**4-methyl-N-(2-(cyclopropylidene(phenyl)methyl)-4-methylphenyl)-N-(propa-1,2-dien-1-yl)benzenesulfonamide (1m)**: Yield: 700 mg, 82%, yellow solid, m.p. 178-180 °C; Eluent: PE/EA = 30/1.  $^1\text{H}$  NMR (400 MHz,  $\text{CDCl}_3$ , TMS)  $\delta$  7.54 (d,  $J = 7.6$  Hz, 2H), 7.36 (d,  $J = 7.6$  Hz, 2H), 7.31 – 7.14 (m, 6H), 6.95 (d,  $J = 8.4$  Hz, 1H), 6.47 (d,  $J = 8.4$  Hz, 1H), 6.44 (t,  $J = 6.0$  Hz, 1H), 4.89 (d,  $J = 6.0$  Hz, 2H), 2.42 (s, 3H), 2.36 (s, 3H), 1.55 – 1.46 (m, 2H), 1.32 – 1.24 (m, 2H);  $^{13}\text{C}\{^1\text{H}\}$ -NMR (100 MHz,  $\text{CDCl}_3$ , TMS)  $\delta$  202.3, 143.5, 142.7, 140.7, 138.7, 135.8, 133.2, 132.5, 129.3, 128.9, 127.9, 127.8, 127.6, 127.4, 126.4, 126.3, 102.2, 86.8, 21.6, 21.3, 4.8, 2.5; IR (neat):  $\nu$  3055, 2984, 2919, 1605, 1492, 1432, 1343, 1166, 1089, 946, 812  $\text{cm}^{-1}$ ; HRMS (ESI-TOF) Calcd for  $\text{C}_{20}\text{H}_{19}\text{NO}_2\text{Na}$   $[\text{M}+\text{Na}]^+$ : 450.14982, found: 450.15055.

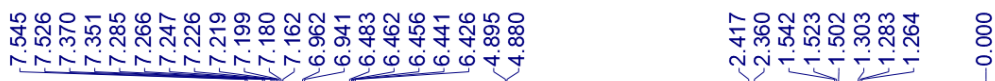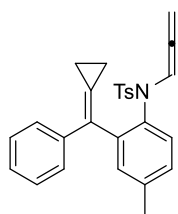

( $^1\text{H}$  NMR, 400 MHz,  $\text{CDCl}_3$ )

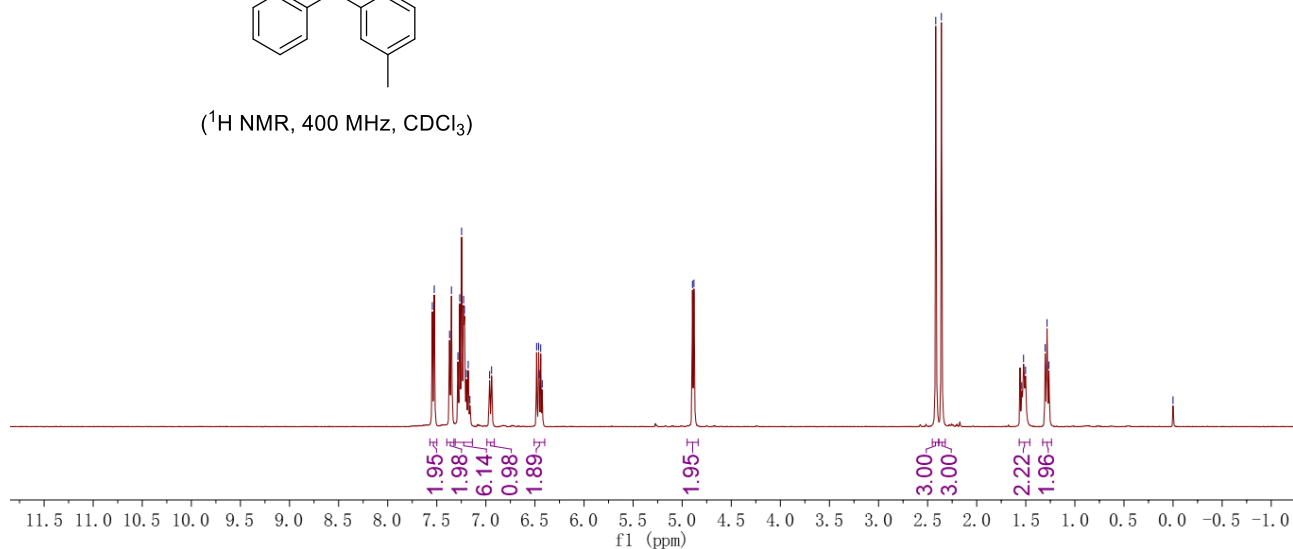

202.274  
 143.491  
 142.688  
 140.728  
 138.719  
 135.824  
 133.219  
 132.500  
 129.303  
 128.936  
 127.869  
 127.838  
 127.563  
 127.436  
 127.377  
 126.383  
 126.307  
 102.160  
 86.765  
 77.317  
 77.000  
 76.682  
 21.553  
 21.251  
 4.797  
 2.478

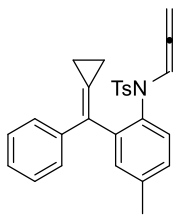

(<sup>13</sup>C NMR, 100 MHz, CDCl<sub>3</sub>)

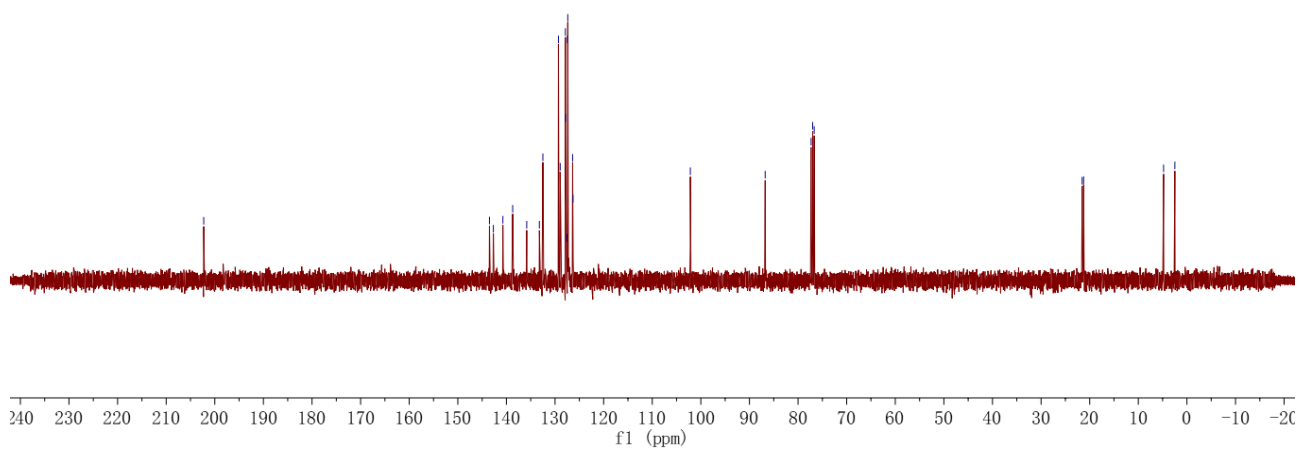

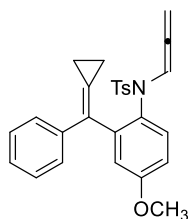

**4-methyl-N-(2-(cyclopropylidene(phenyl)methyl)-4-methoxyphenyl)-N-(propa-1,2-dien-1-yl)benzenesulfonamide (1n):** Yield: 709 mg, 80%, yellow solid, m.p. 146-148 °C; Eluent: PE/EA = 30/1. <sup>1</sup>H NMR (400 MHz, CDCl<sub>3</sub>, TMS) δ 7.53 (d, *J* = 8.0 Hz, 2H), 7.37 (d, *J* = 8.0 Hz, 2H), 7.32 – 7.14 (m, 5H), 6.94 (d, *J* = 2.8 Hz, 1H), 6.67 (dd, *J*<sub>1</sub> = 9.2 Hz, *J*<sub>2</sub> = 2.8 Hz, 1H), 6.47 (d, *J* = 9.2 Hz, 1H), 6.44 (t, *J* = 6.0 Hz, 1H), 4.90 (d, *J* = 6.0 Hz, 2H), 3.79 (s, 3H), 2.41 (s, 3H), 1.58 – 1.44 (m, 2H), 1.33 – 1.24 (m, 2H); <sup>13</sup>C{<sup>1</sup>H}-NMR (100 MHz, CDCl<sub>3</sub>, TMS) δ 202.2, 159.3, 144.4, 143.5, 140.4, 135.7, 130.2, 129.3, 128.4, 127.8, 127.6, 127.4, 127.3, 126.5, 126.4, 116.7, 112.4, 102.4, 86.8, 55.3, 21.5, 4.8, 2.5; IR (neat): ν 3039, 2974, 1589, 1492, 1356, 1232, 1167, 966, 811 cm<sup>-1</sup>; HRMS (ESI-TOF) Calcd for C<sub>20</sub>H<sub>19</sub>NO<sub>2</sub>Na [M+Na]<sup>+</sup>: 466.14474, found: 466.14487.

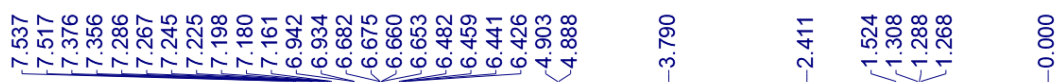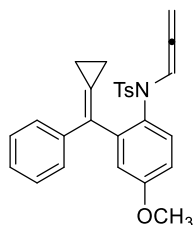

(<sup>1</sup>H NMR, 400 MHz, CDCl<sub>3</sub>)

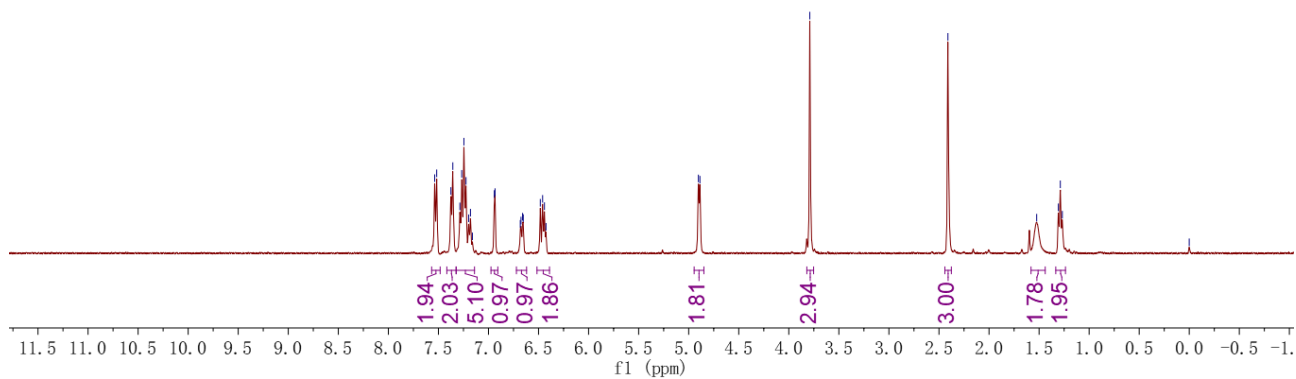

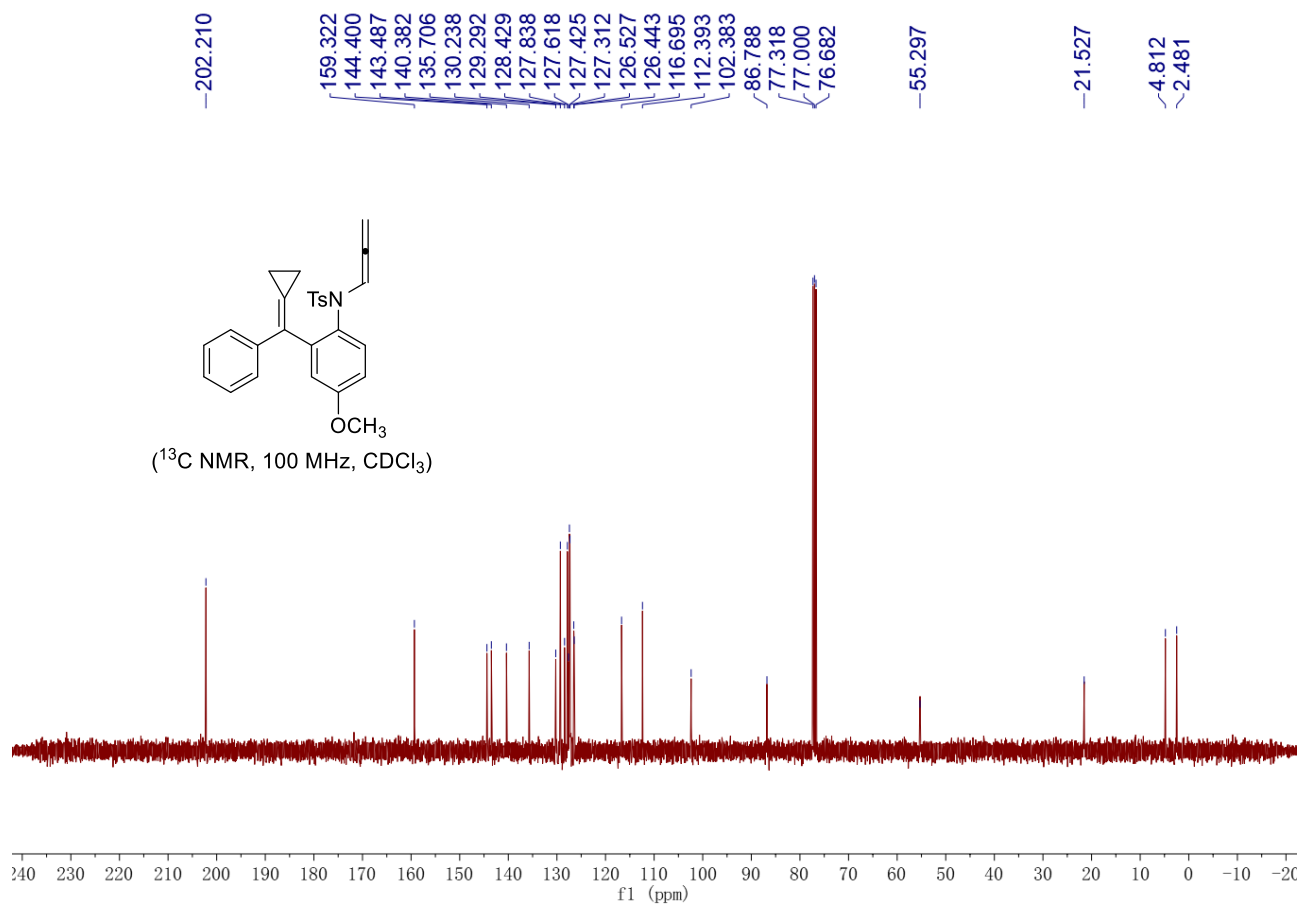



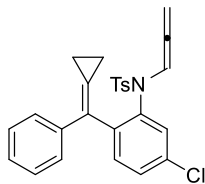

**4-methyl-N-(5-chloro-2-(cyclopropylidene(phenyl)methyl)phenyl)-N-(propa-1,2-dien-1-yl)benzenesulfonamide (10):** Yield: 662 mg, 74%, yellow solid, m.p. 154-156 °C; Eluent: PE/EA = 30/1. <sup>1</sup>H NMR (400 MHz, CDCl<sub>3</sub>, TMS) δ 7.52 (d, *J* = 8.0 Hz, 2H), 7.44 – 7.33 (m, 2H), 7.33 – 7.19 (m, 6H), 7.16 (td, *J* = 7.5, 2.0 Hz, 1H), 6.58 (d, *J* = 7.9 Hz, 1H), 6.48 (t, *J* = 6.1 Hz, 1H), 4.90 (d, *J* = 6.1 Hz, 2H), 2.42 (s, 3H), 1.56 – 1.43 (m, 2H), 1.34 – 1.22 (m, 2H); <sup>13</sup>C{<sup>1</sup>H}-NMR (100 MHz, CDCl<sub>3</sub>, TMS) δ 202.1, 143.7, 142.6, 139.2, 135.9, 135.6, 132.1, 131.8, 129.4, 129.3, 128.9, 128.6, 127.9, 127.6, 127.5, 127.2, 126.6, 102.1, 86.9, 21.6, 4.9, 2.6; IR (neat): ν 3055, 3029, 2964, 1599, 1490, 1356, 1260, 1165, 1092, 1025, 887, 816 cm<sup>-1</sup>; HRMS (ESI-TOF) Calcd for C<sub>20</sub>H<sub>19</sub>NO<sub>2</sub>Na [M+Na]<sup>+</sup>: 470.09520, found: 470.09466.

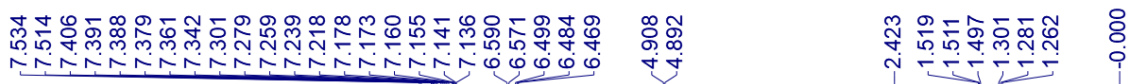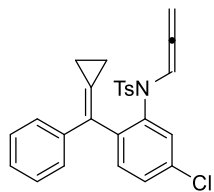

(<sup>1</sup>H NMR, 400 MHz, CDCl<sub>3</sub>)

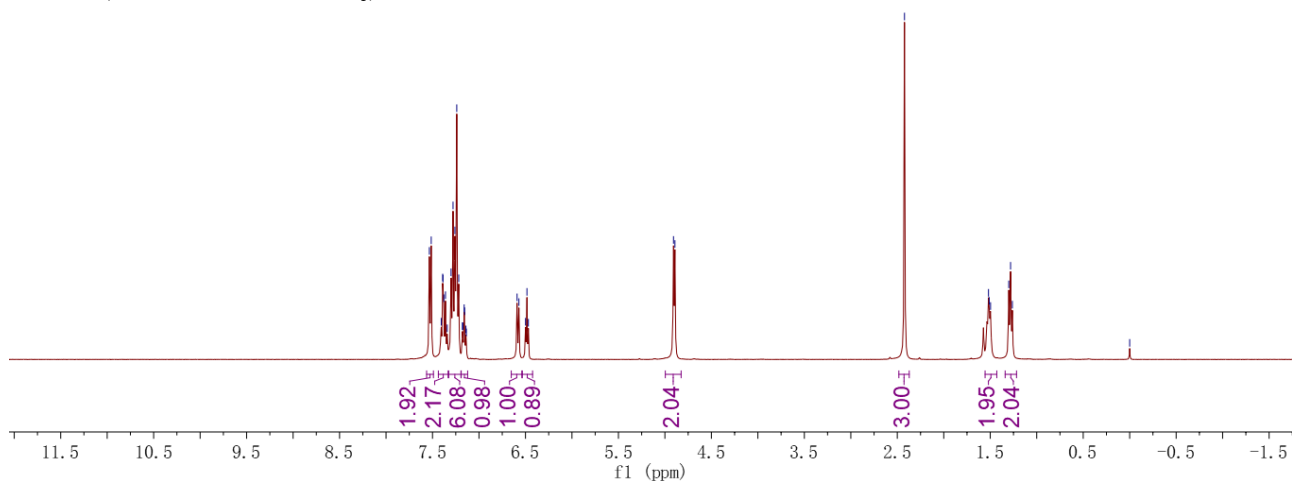

-202.123  
 143.714  
 142.582  
 139.212  
 135.856  
 135.561  
 132.055  
 131.838  
 129.379  
 129.337  
 128.908  
 128.594  
 127.855  
 127.601  
 127.451  
 127.232  
 126.644  
 -102.128  
 86.931  
 77.317  
 77.000  
 76.683  
 -21.561  
 4.854  
 2.616

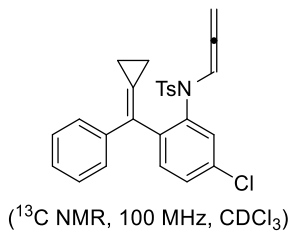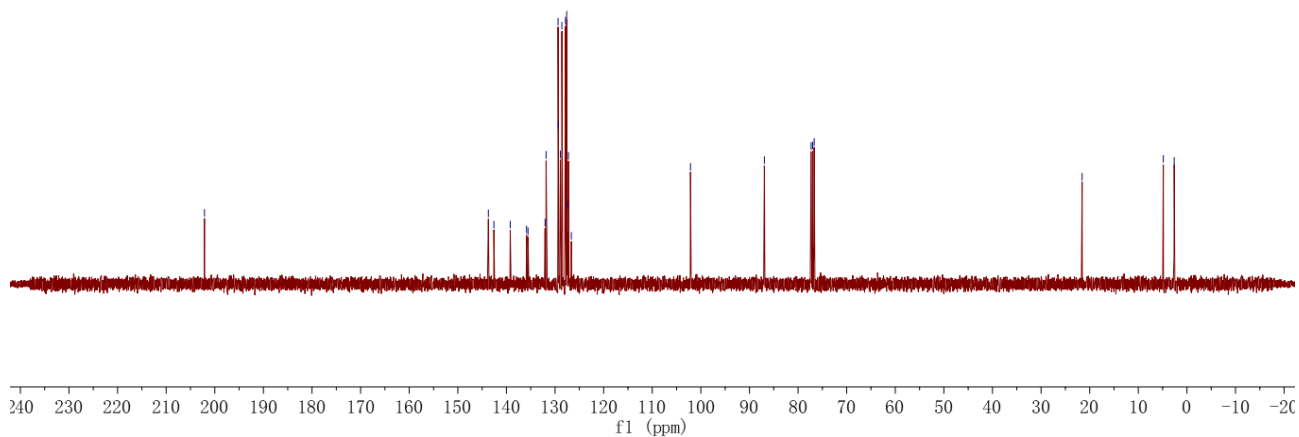

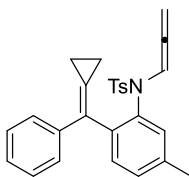

**4-methyl-N-(2-(cyclopropylidene(phenyl)methyl)-5-methylphenyl)-N-(propa-1,2-dien-1-yl)benzenesulfonamide (1p)**: Yield: 717 mg, 84%, yellow solid, m.p. 156-158 °C; Eluent: PE/EA = 30/1.  $^1\text{H}$  NMR (400 MHz,  $\text{CDCl}_3$ , TMS)  $\delta$  7.53 (d,  $J = 8.0$  Hz, 2H), 7.36 (d,  $J = 7.6$  Hz, 2H), 7.33 – 7.12 (m, 7H), 6.51 – 6.37 (m, 2H), 4.89 (d,  $J = 6.2$  Hz, 2H), 2.42 (s, 3H), 2.22 (s, 3H), 1.57 – 1.40 (m, 2H), 1.36 – 1.19 (m, 2H);  $^{13}\text{C}\{^1\text{H}\}$ -NMR (100 MHz,  $\text{CDCl}_3$ , TMS)  $\delta$  202.3, 143.5, 140.7, 139.7, 136.9, 135.7, 135.7, 131.6, 129.7, 129.5, 129.2, 127.9, 127.4, 127.3, 126.3, 126.2, 101.9, 86.6, 21.5, 20.8, 4.8, 2.4; IR (neat):  $\nu$  3039, 2966, 2919, 1594, 1487, 1442, 1358, 1168, 969, 812  $\text{cm}^{-1}$ ; HRMS (ESI-TOF) Calcd for  $\text{C}_{20}\text{H}_{19}\text{NO}_2\text{Na}$   $[\text{M}+\text{Na}]^+$ : 450.14982, found: 450.15070.

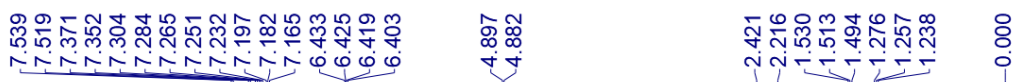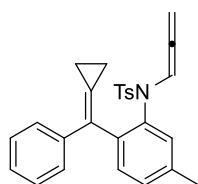

( $^1\text{H}$  NMR, 400 MHz,  $\text{CDCl}_3$ )

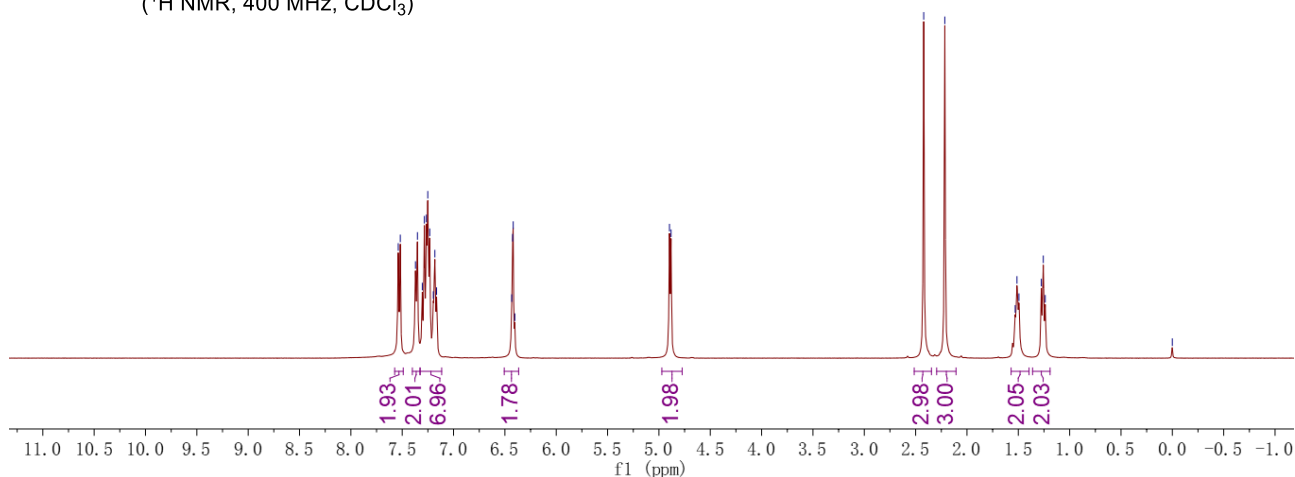

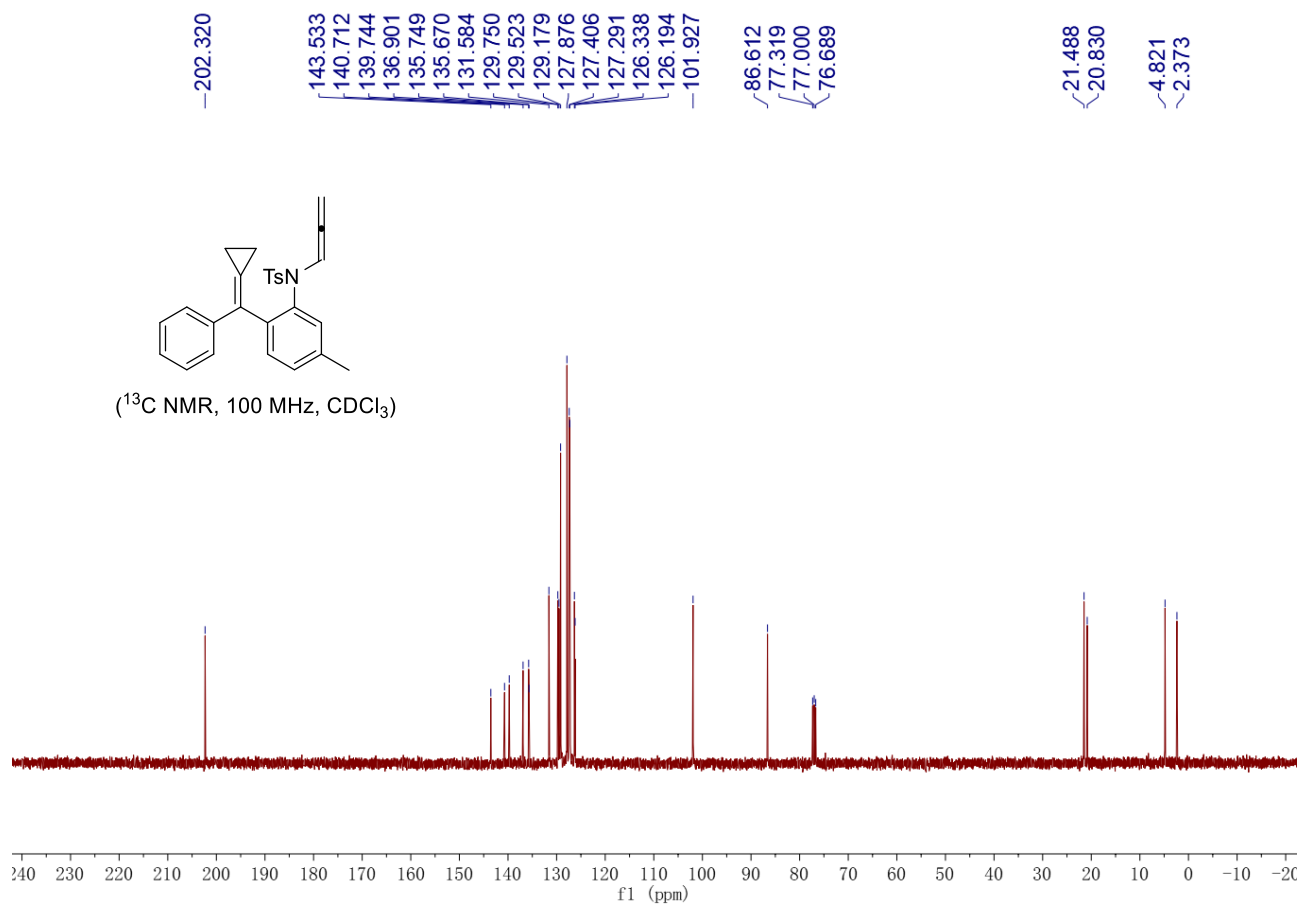

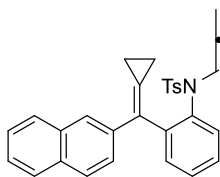

**4-methyl-N-(2-(cyclopropylidene(naphthalen-2-yl)methyl)phenyl)-N-(propa-1,2-dien-1-yl)benzenesulfonamide (1q):** Yield: 722 mg, 78%, yellow solid, m.p. 158-160 °C; Eluent: PE/EA = 30/1.  $^1\text{H}$  NMR (400 MHz,  $\text{CDCl}_3$ , TMS)  $\delta$  7.82 – 7.76 (m, 3H), 7.67 (d,  $J = 5.2$  Hz, 1H), 7.56 – 7.46 (m, 4H), 7.46 – 7.35 (m, 3H), 7.20 (m, 3H), 6.64 (d,  $J = 8.0$  Hz, 1H), 6.33 (t,  $J = 6.1$  Hz, 1H), 4.83 (d,  $J = 6.1$  Hz, 2H), 2.39 (s, 3H), 1.67 – 1.55 (m, 2H), 1.37 – 1.25 (m, 2H);  $^{13}\text{C}\{^1\text{H}\}$ -NMR (100 MHz,  $\text{CDCl}_3$ , TMS)  $\delta$  202.1, 143.6, 143.1, 138.2, 136.0, 135.7, 133.1, 132.3, 132.0, 129.4, 129.3, 128.9, 127.8, 127.8, 127.7, 127.5, 127.2, 127.0, 126.0, 125.8, 125.6, 125.2, 101.9, 86.8, 21.5, 5.1, 2.5; IR (neat):  $\nu$  3044, 2968, 1592, 1490, 1432, 1358, 1167, 1141, 879, 812  $\text{cm}^{-1}$ ; HRMS (ESI-TOF) Calcd for  $\text{C}_{20}\text{H}_{19}\text{NO}_2\text{Na}$   $[\text{M}+\text{Na}]^+$ : 486.14982, found: 486.15047.

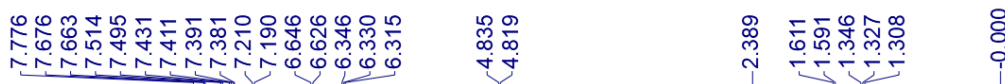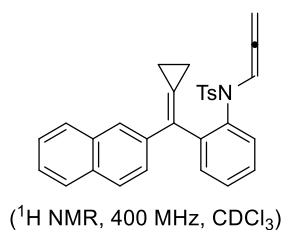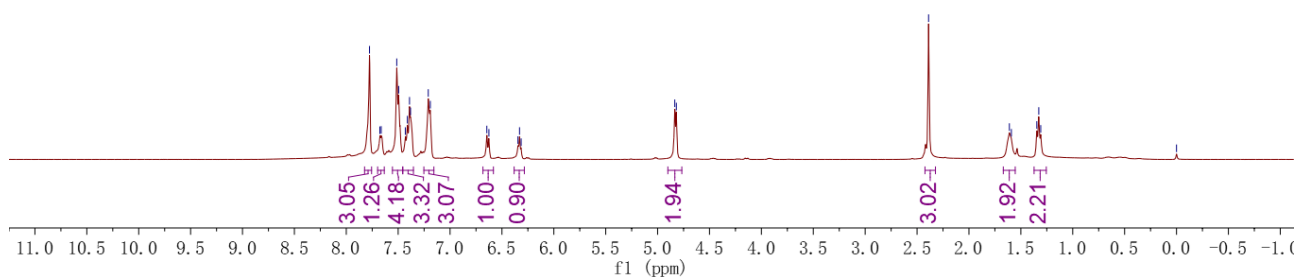

202.133  
 143.566  
 143.070  
 138.187  
 135.992  
 135.659  
 133.131  
 132.321  
 131.992  
 129.383  
 129.289  
 128.896  
 127.828  
 127.773  
 127.656  
 127.490  
 127.160  
 127.049  
 125.956  
 125.823  
 125.641  
 125.245  
 -101.895  
 86.752  
 77.320  
 77.002  
 76.684  
 -21.490  
 -5.100  
 -2.540

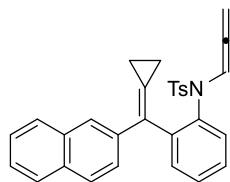

(<sup>13</sup>C NMR, 100 MHz, CDCl<sub>3</sub>)

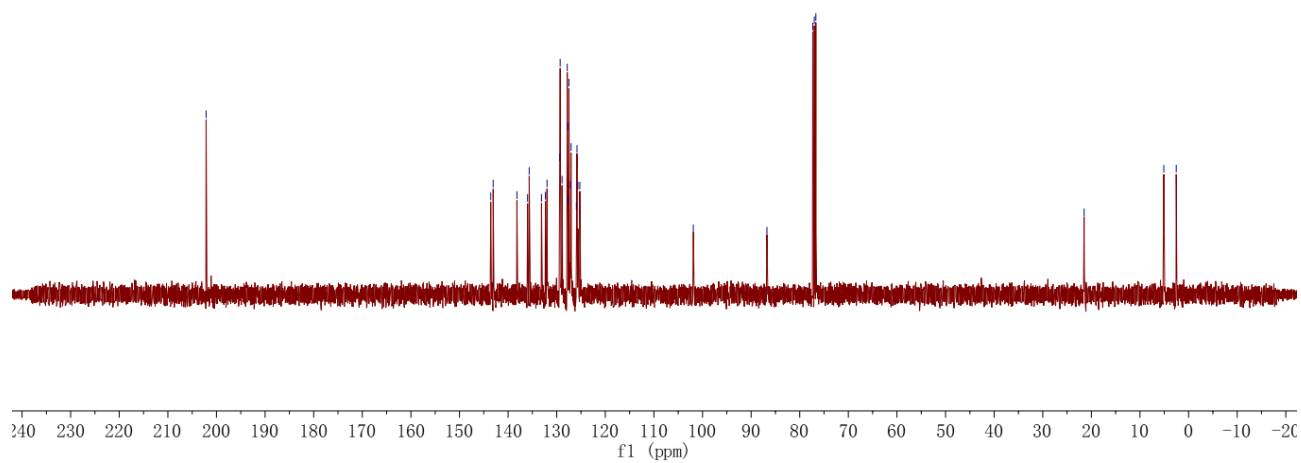

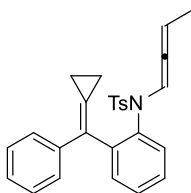

***N*-(buta-1,2-dien-1-yl)-*N*-(2-(cyclopropylidene(phenyl)methyl)phenyl)-4-methylbenzenesulfonamide (**1u**):** Yield: 615 mg, 72%, yellow solid, m.p. 137-139 °C; Eluent: PE/EA = 30/1. <sup>1</sup>H NMR (400 MHz, CDCl<sub>3</sub>, TMS) δ 7.51 (d, *J* = 8.0 Hz, 2H), 7.43 – 7.34 (m, 3H), 7.31 (t, *J* = 7.4 Hz, 1H), 7.25 (t, *J* = 7.4 Hz, 2H), 7.22 – 7.08 (m, 4H), 6.58 (d, *J* = 8.0 Hz, 1H), 6.34 (dq, *J*<sub>1</sub> = 6.4 Hz, *J*<sub>2</sub> = 2.8 Hz, 1H), 5.25 (dq, *J*<sub>1</sub> = 7.2 Hz, *J*<sub>2</sub> = 6.4 Hz, 1H), 2.36 (s, 3H), 1.56 – 1.45 (m, 2H), 1.41 (dd, *J*<sub>1</sub> = 7.2 Hz, *J*<sub>2</sub> = 2.8 Hz, 3H), 1.31 – 1.22 (m, 2H); <sup>13</sup>C{<sup>1</sup>H}-NMR (100 MHz, CDCl<sub>3</sub>, TMS) δ 197.1, 143.3, 142.8, 140.6, 136.2, 135.6, 131.8, 129.1, 128.5, 127.8, 127.6, 127.4, 127.3, 126.8, 126.5, 126.3, 101.1, 97.7, 21.4, 15.0, 4.7, 2.5; IR (neat): ν 3047, 2972, 2917, 1597, 1495, 1443, 1353, 1166, 1030, 863, 754 cm<sup>-1</sup>; HRMS (ESI-TOF) Calcd for C<sub>20</sub>H<sub>19</sub>NO<sub>2</sub>Na [M+Na]<sup>+</sup>: 450.14982, found: 450.15066.

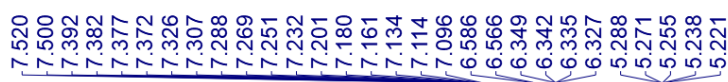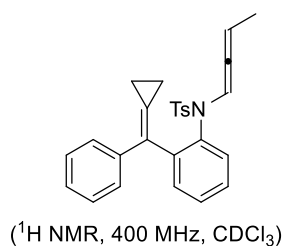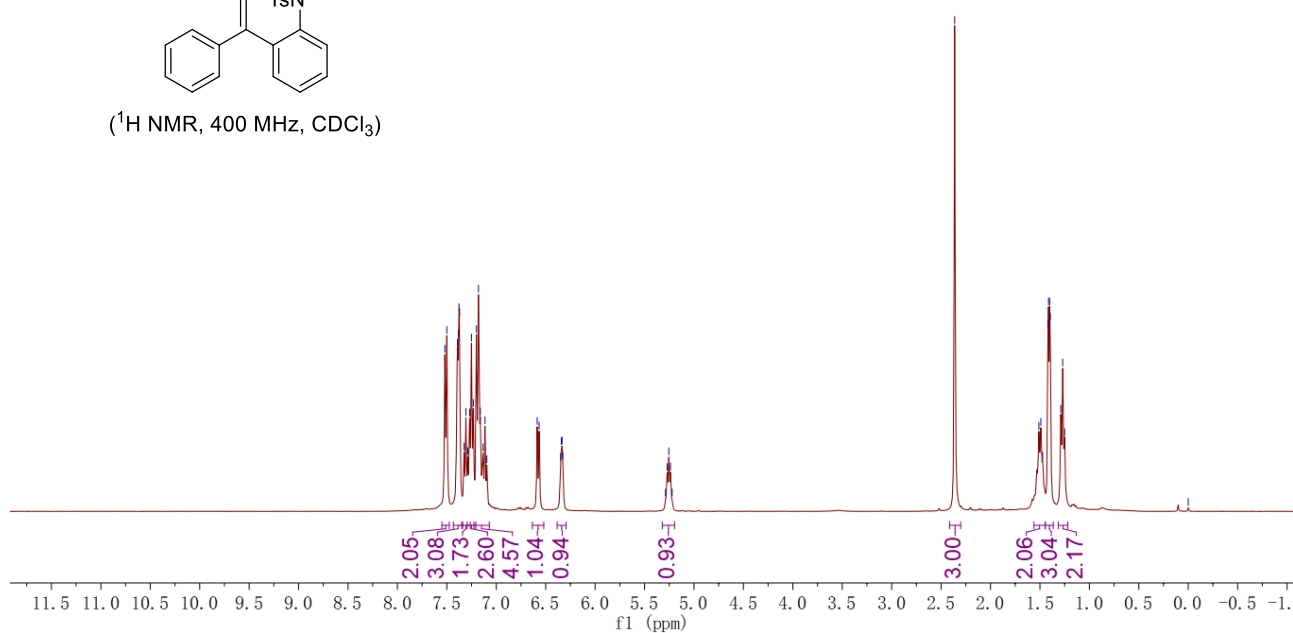

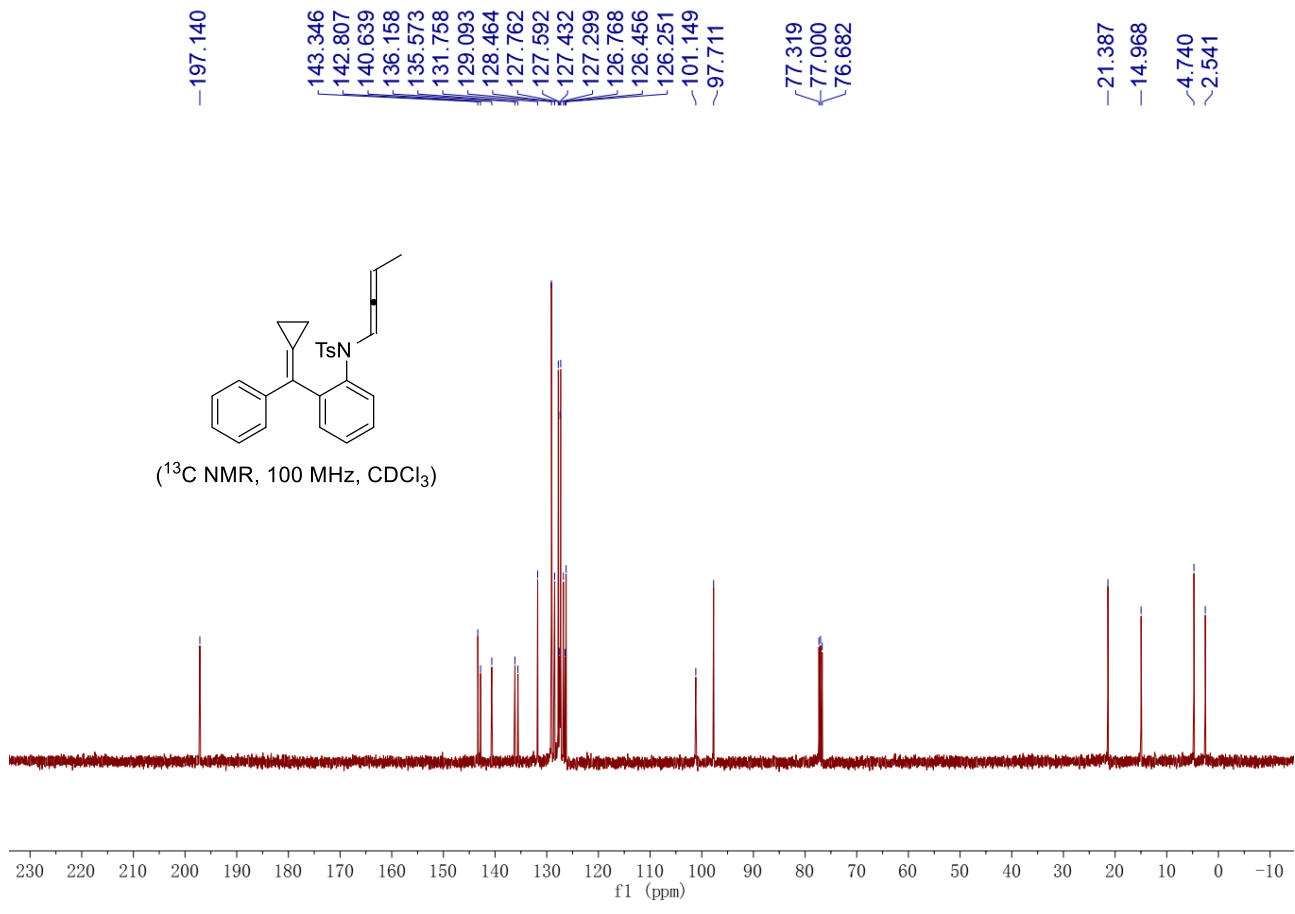



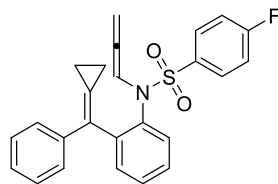

***N*-(2-(cyclopropylidene(phenyl)methyl)phenyl)-4-fluoro-*N*-(propa-1,2-dien-1-yl)benzenesulfonamide (1v):** Yield: 659 mg, 79%, yellow solid, m.p. 166-168 °C; Eluent: PE/EA = 30/1. <sup>1</sup>H NMR (400 MHz, CDCl<sub>3</sub>, TMS) δ 7.73 – 7.57 (m, 2H), 7.49 – 7.31 (m, 4H), 7.31 – 7.05 (m, 6H), 6.58 (d, *J* = 8.0 Hz, 1H), 6.40 (t, *J* = 6.0 Hz, 1H), 4.90 (d, *J* = 6.0 Hz, 2H), 1.67 – 1.37 (m, 2H), 1.37 – 1.12 (m, 2H); <sup>13</sup>C{<sup>1</sup>H}-NMR (100 MHz, CDCl<sub>3</sub>, TMS) δ 202.4, 165.1 (d, *J* = 253.7 Hz), 143.1, 140.5, 135.7, 134.7, 132.1, 130.5 (d, *J* = 9.3 Hz), 129.1, 129.0, 127.5, 127.5, 127.3, 127.1, 126.8, 126.5, 116.0 (d, *J* = 22.3 Hz), 101.8, 86.9, 4.9, 2.5. IR (neat): ν 3076, 3052, 2964, 1589, 1494, 1440, 1359, 1170, 1162, 1022, 897, 836 cm<sup>-1</sup>; HRMS (ESI-TOF) Calcd for C<sub>20</sub>H<sub>19</sub>NO<sub>2</sub>Na [M+Na]<sup>+</sup>: 440.10910, found: 440.10982.

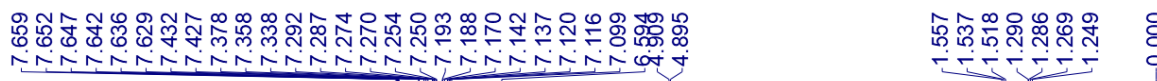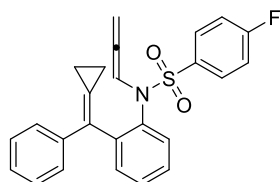

(<sup>1</sup>H NMR, 400 MHz, CDCl<sub>3</sub>)

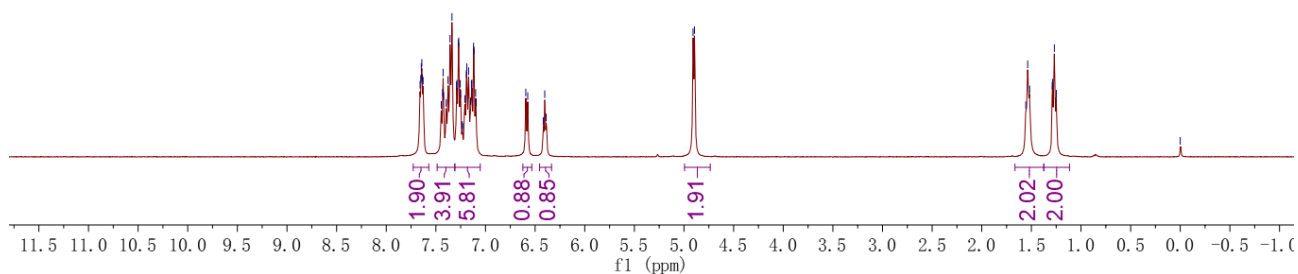

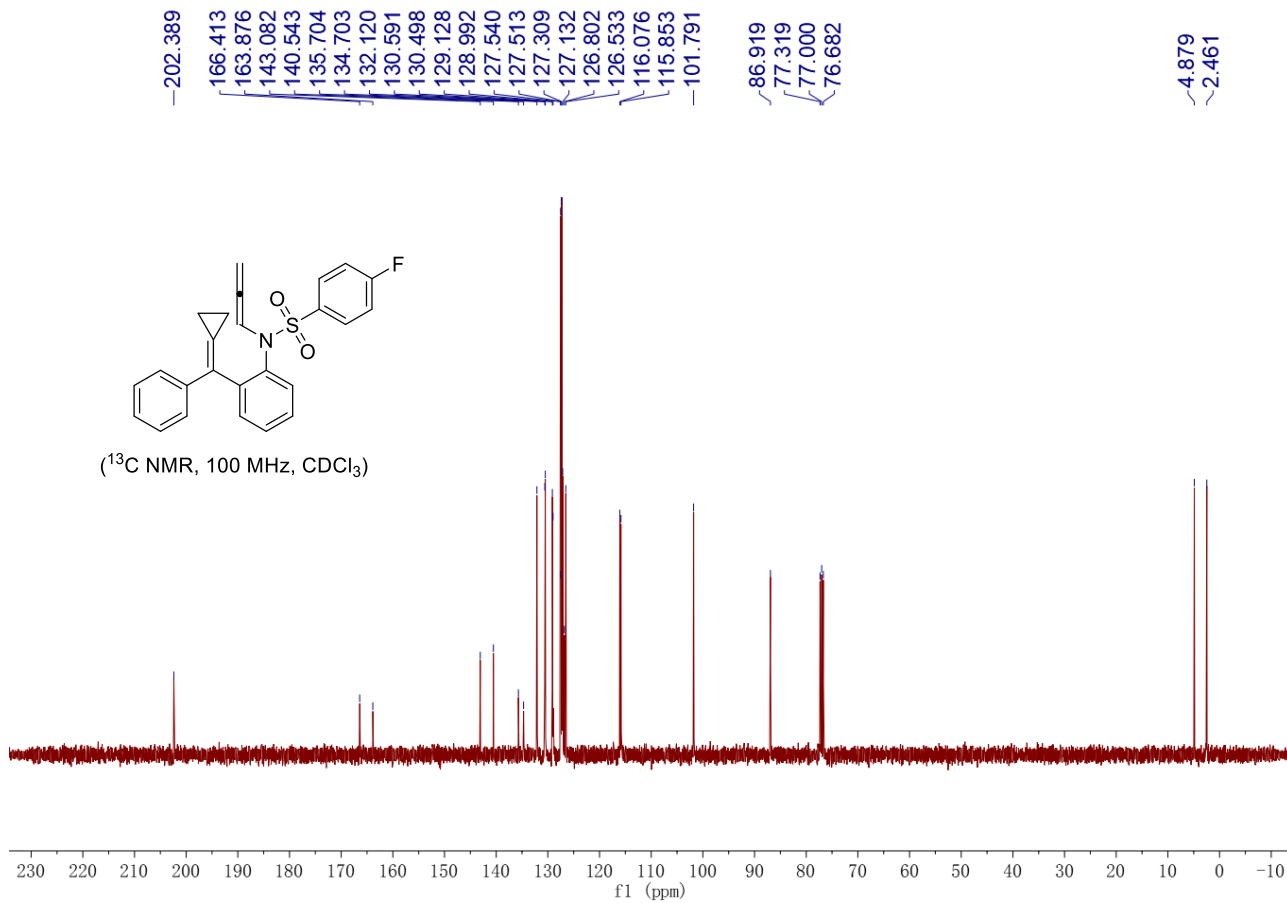

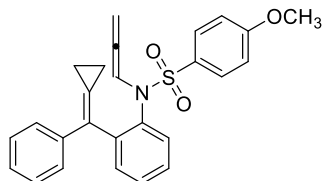

***N*-(2-(cyclopropylidene(phenyl)methyl)phenyl)-4-methoxy-*N*-(propa-1,2-dien-1-yl)benzenesulfonamide (1w):** Yield: 703 mg, 82%, yellow solid, m.p. 141-143 °C; Eluent: PE/EA = 30/1. <sup>1</sup>H NMR (400 MHz, CDCl<sub>3</sub>, TMS) δ 7.57 (d, *J* = 8.4 Hz, 2H), 7.47 – 7.32 (m, 4H), 7.32 – 7.12 (m, 4H), 6.91 (d, *J* = 8.4 Hz, 2H), 6.63 (d, *J* = 8.0 Hz, 1H), 6.44 (t, *J* = 6.0 Hz, 1H), 4.89 (d, *J* = 6.0 Hz, 2H), 3.85 (s, 3H), 1.59 – 1.46 (m, 2H), 1.29-1.25 (m, 2H); <sup>13</sup>C{<sup>1</sup>H}-NMR (100 MHz, CDCl<sub>3</sub>, TMS) δ 202.3, 163.0, 143.0, 140.7, 136.0, 131.9, 130.4, 130.0, 129.3, 128.8, 127.5, 127.3, 127.0, 126.6, 126.4, 113.8, 102.1, 86.7, 55.5, 4.9, 2.5; IR (neat): ν 3045, 2974, 1589, 1497, 1361, 1262, 1153, 1092, 1027, 828, 755 cm<sup>-1</sup>; HRMS (ESI-TOF) Calcd for C<sub>20</sub>H<sub>19</sub>NO<sub>2</sub>Na [M+Na]<sup>+</sup>: 452.12909, found: 452.12968.

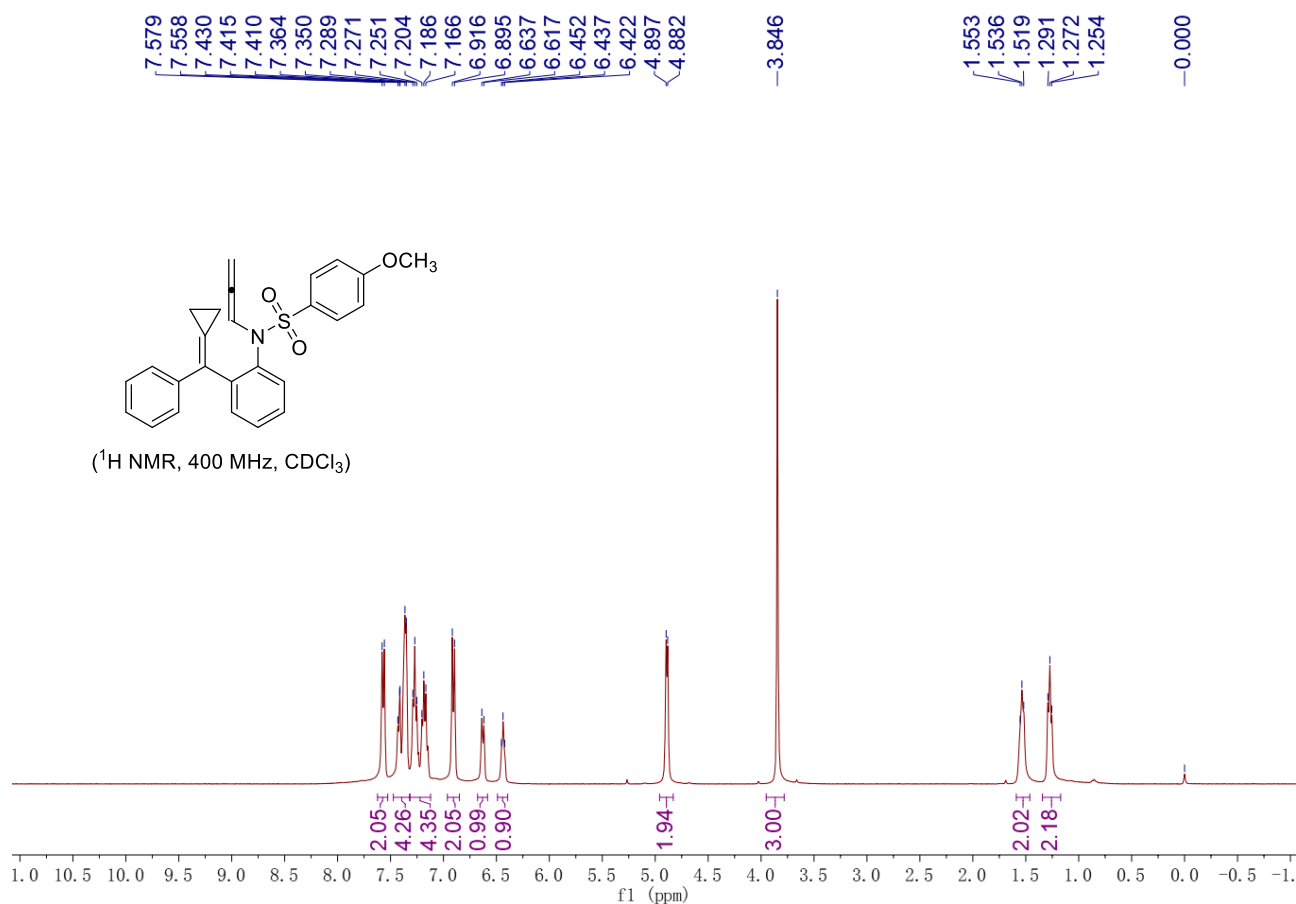

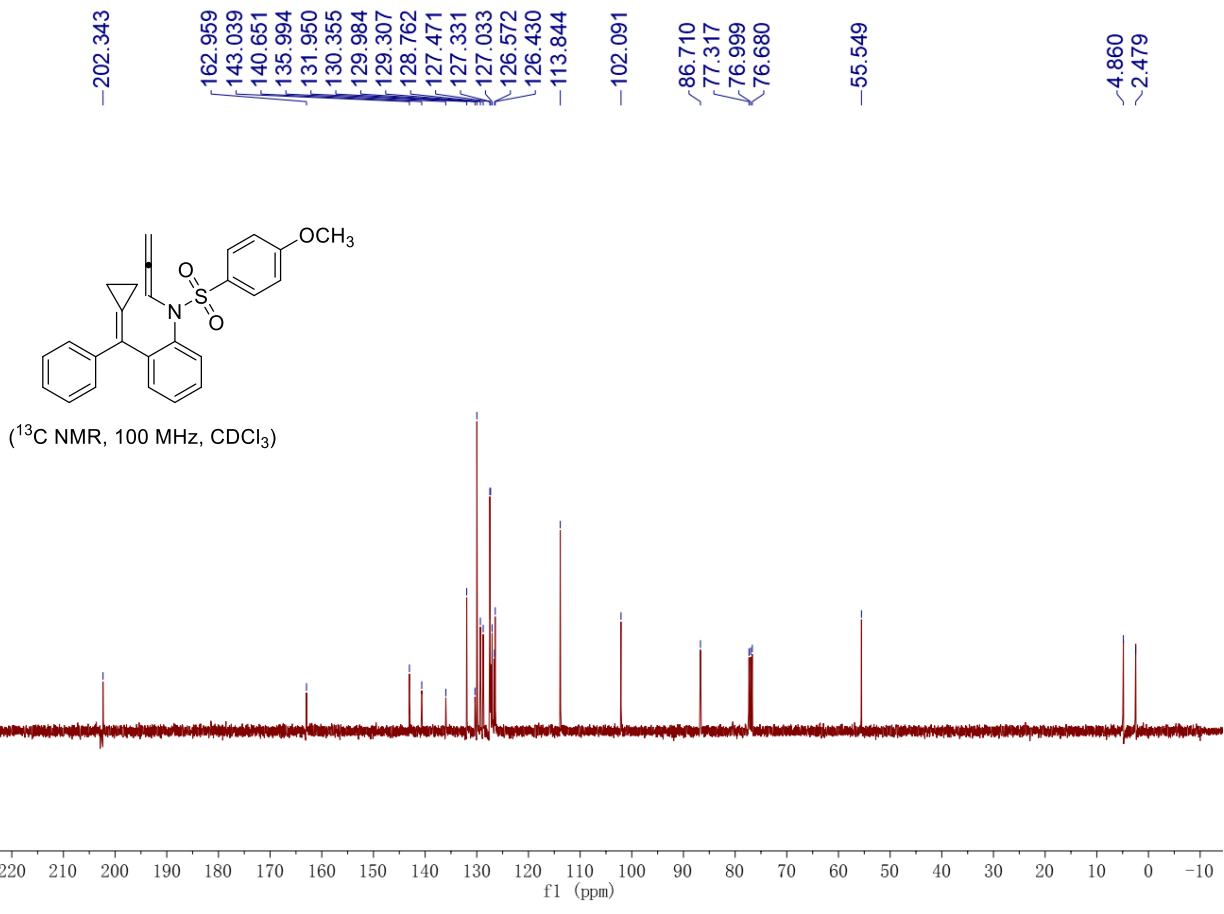

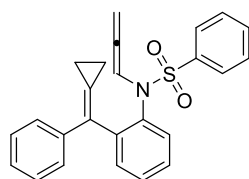

***N*-(2-(cyclopropylidene(phenyl)methyl)phenyl)-*N*-(propa-1,2-dien-1-yl)benzenesulfonamide**

(**1x**): Yield: 614 mg, 77%, yellow solid, m.p. 149-151 °C; Eluent: PE/EA = 30/1. <sup>1</sup>H NMR (400 MHz, CDCl<sub>3</sub>, TMS) δ 7.65 (d, *J* = 7.6 Hz, 2H), 7.57 (t, *J* = 7.6 Hz, 1H), 7.50 – 7.10 (m, 10H), 6.57 (d, *J* = 8.0 Hz, 1H), 6.52 – 6.38 (m, 1H), 4.89 (d, *J* = 6.0 Hz, 2H), 1.59 – 1.47 (m, 2H), 1.34 – 1.23 (m, 2H); <sup>13</sup>C{<sup>1</sup>H}-NMR (100 MHz, CDCl<sub>3</sub>, TMS) δ 202.3, 143.0, 140.6, 138.6, 135.8, 132.8, 132.0, 129.3, 128.9, 128.7, 127.8, 127.5, 127.3, 127.1, 126.7, 126.5, 102.0, 86.9, 4.8, 2.5; IR (neat): ν 3050, 3026, 2969, 1599, 1490, 1440, 1355, 1343, 1169, 1091, 1023, 941, 894, 753 cm<sup>-1</sup>; HRMS (ESI-TOF) Calcd for C<sub>20</sub>H<sub>19</sub>NO<sub>2</sub>Na [M+Na]<sup>+</sup>: 422.11852, found: 422.11798.

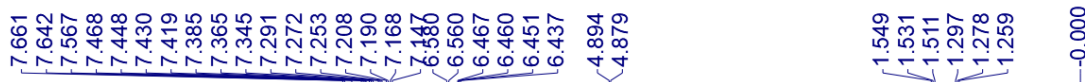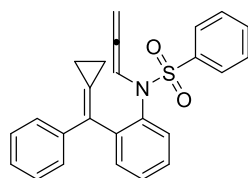

(<sup>1</sup>H NMR, 400 MHz, CDCl<sub>3</sub>)

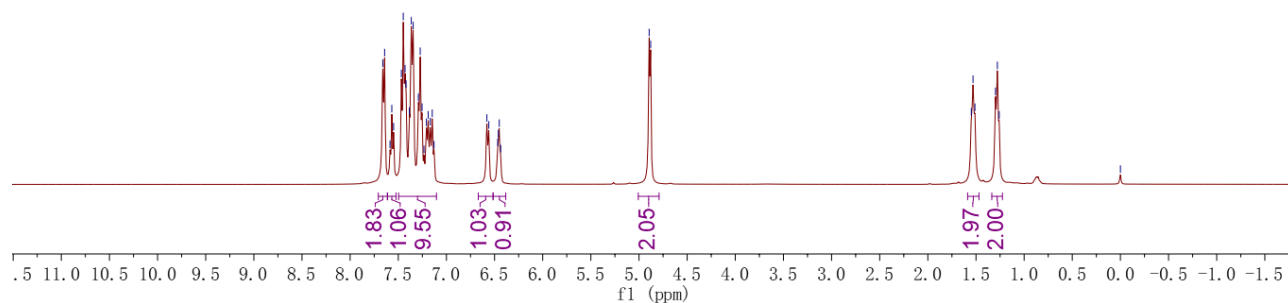

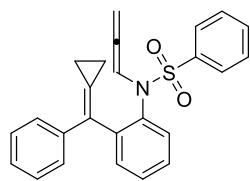

(<sup>13</sup>C NMR, 100 MHz, CDCl<sub>3</sub>)

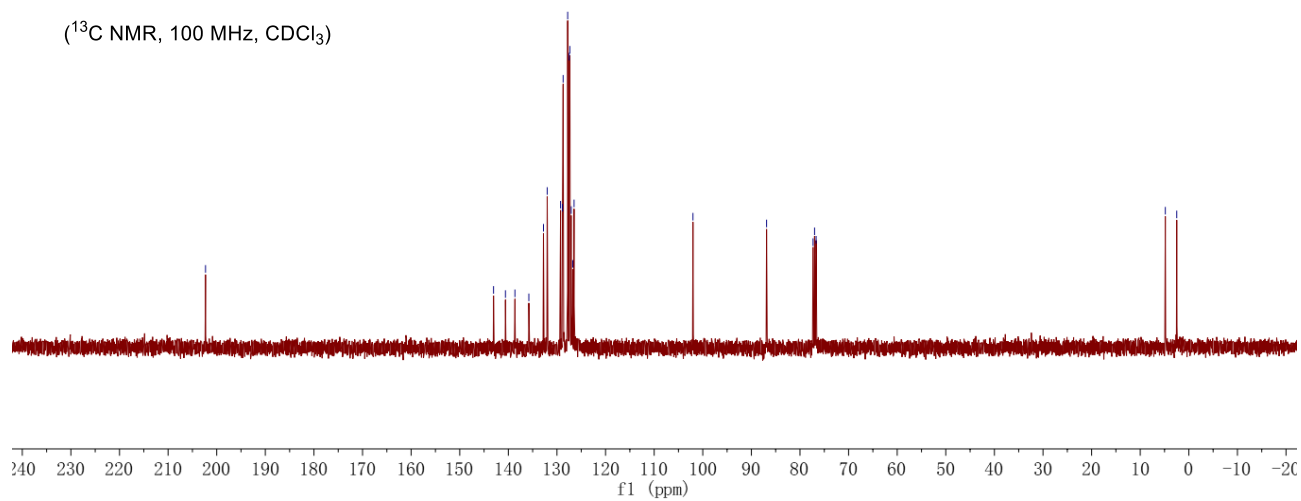

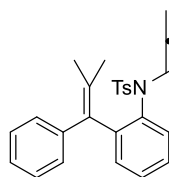

**4-methyl-N-(2-(2-methyl-1-phenylprop-1-en-1-yl)phenyl)-N-(propa-1,2-dien-1-yl)benzenesulfonamide (1y):** Yield: 689 mg, 83%, yellow solid, m.p. 154-156 °C; Eluent: PE/EA = 30/1.  $^1\text{H}$  NMR (400 MHz,  $\text{CDCl}_3$ , TMS)  $\delta$  7.58 (d,  $J = 8.0$  Hz, 2H), 7.45 (d,  $J = 7.6$  Hz, 1H), 7.33 (t,  $J = 7.6$  Hz, 1H), 7.29 – 7.01 (m, 9H), 6.60 (d,  $J = 8.0$  Hz, 1H), 6.29 (s, 1H), 4.62 (s, 1H), 4.37 (s, 1H), 2.42 (s, 3H), 1.89 (s, 3H), 1.82 (s, 3H);  $^{13}\text{C}\{^1\text{H}\}$ -NMR (100 MHz,  $\text{CDCl}_3$ , TMS)  $\delta$  201.3, 144.9, 143.5, 141.5, 136.1, 136.1, 134.0, 133.3, 132.5, 130.4, 129.4, 128.5, 127.8, 127.1, 126.6, 125.6, 101.8, 86.6, 23.1, 21.9, 21.5; IR (neat):  $\nu$  3045, 2985, 2906, 1435, 1347, 1164, 1088, 1020, 963, 813  $\text{cm}^{-1}$ ; HRMS (ESI-TOF) Calcd for  $\text{C}_{20}\text{H}_{19}\text{NO}_2\text{Na}$   $[\text{M}+\text{Na}]^+$ : 438.14982, found: 438.14968.

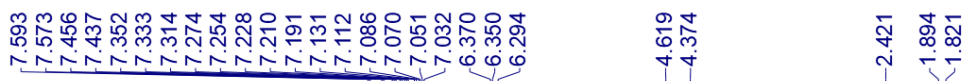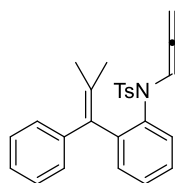

( $^1\text{H}$  NMR, 400 MHz,  $\text{CDCl}_3$ )

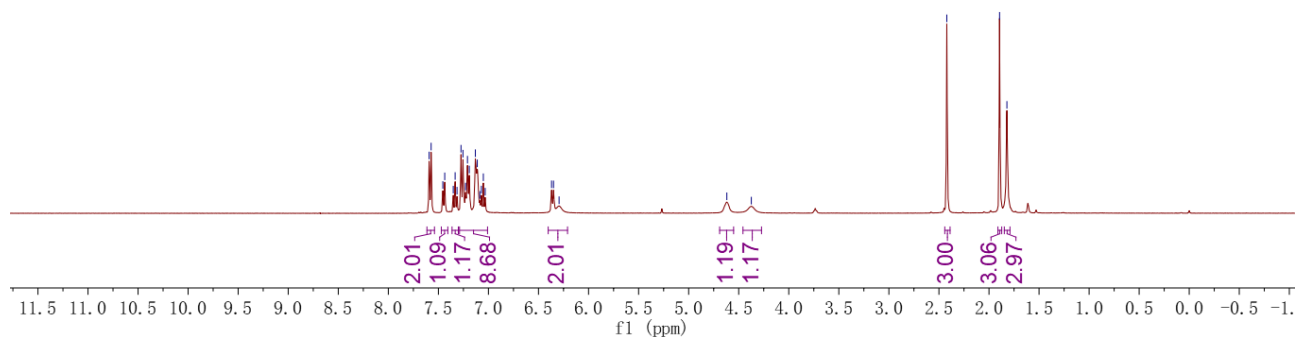

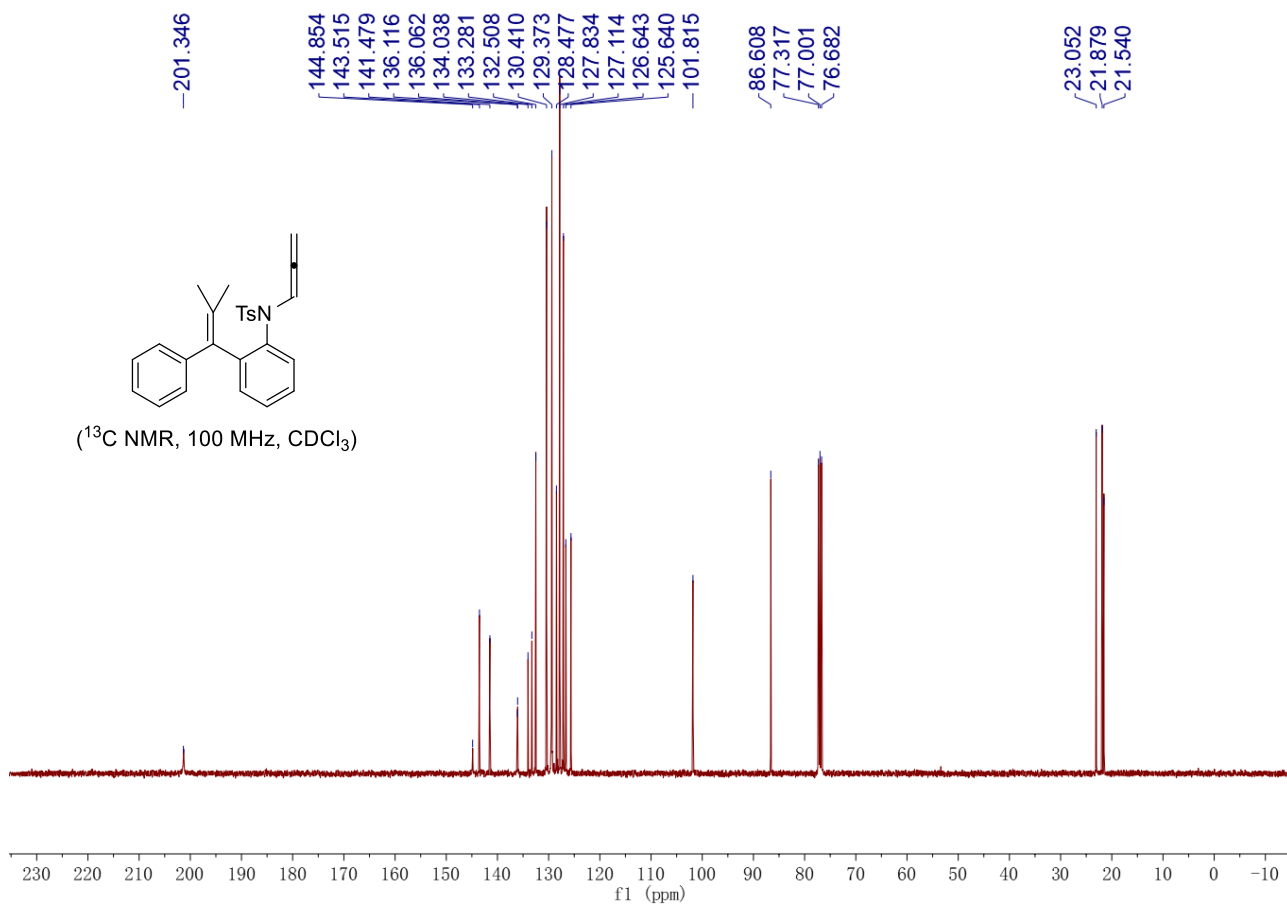



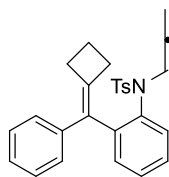

**4-methyl-N-(2-(cyclobutylidene(phenyl)methyl)phenyl)-N-(propa-1,2-dien-1-yl)benzenesulfonamide (1z):** Yield: 683 mg, 80%, yellow solid, m.p. 178-180 °C; Eluent: PE/EA = 30/1.  $^1\text{H}$  NMR (400 MHz,  $\text{CDCl}_3$ , TMS)  $\delta$  7.58 (d,  $J = 8.0$  Hz, 2H), 7.47 (d,  $J = 7.2$  Hz, 1H), 7.36 (t,  $J = 7.2$  Hz, 1H), 7.31 – 7.17 (m, 4H), 7.16 – 7.03 (m, 4H), 6.51 (d,  $J = 7.6$  Hz, 1H), 6.29 (t,  $J = 6.0$  Hz, 1H), 4.70 (d,  $J = 6.0$  Hz, 2H), 3.14 – 2.91 (m, 2H), 2.89 – 2.73 (m, 2H), 2.43 (s, 3H), 2.10 – 1.92 (m, 2H);  $^{13}\text{C}\{^1\text{H}\}$ -NMR (100 MHz,  $\text{CDCl}_3$ , TMS)  $\delta$  202.0, 143.5, 143.1, 142.0, 139.9, 136.1, 136.0, 132.2, 130.3, 129.5, 129.4, 128.7, 128.1, 127.8, 127.3, 126.9, 125.7, 101.7, 86.6, 31.9, 31.2, 21.5, 17.1; IR (neat):  $\nu$  3068, 2985, 2909, 1597, 1474, 1443, 1346, 1158, 1088, 899, 771  $\text{cm}^{-1}$ ; HRMS (ESI-TOF) Calcd for  $\text{C}_{20}\text{H}_{19}\text{NO}_2\text{Na}$   $[\text{M}+\text{Na}]^+$ : 450.14582, found: 450.15053.

7.590  
7.570  
7.476  
7.458  
7.373  
7.356  
7.337  
7.277  
7.258  
7.238  
7.219  
7.201  
7.128  
7.110  
7.092  
7.073  
6.522  
6.503  
6.307  
6.292  
6.277  
4.704  
4.690  
3.032  
2.832  
2.816  
2.797  
2.431  
2.054  
2.035  
2.016  
-0.000

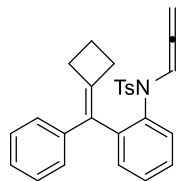

(<sup>1</sup>H NMR, 400 MHz, CDCl<sub>3</sub>)

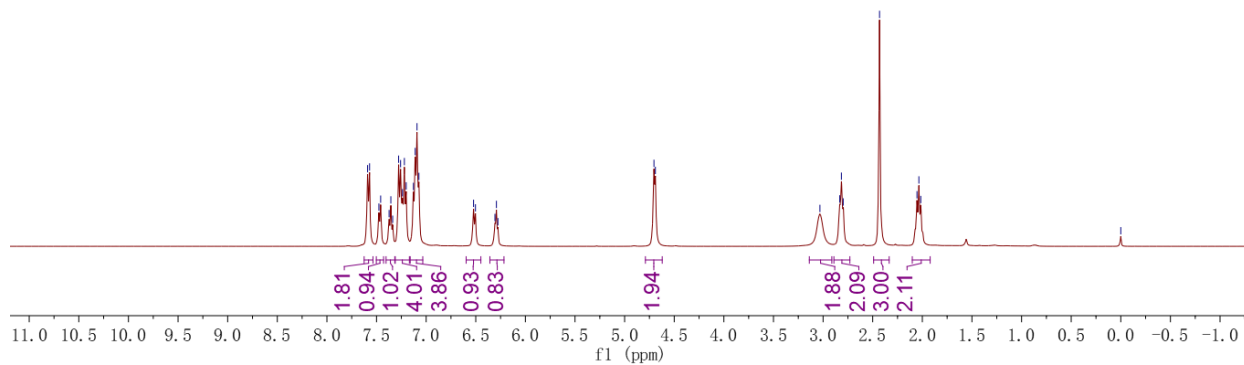

202.035  
143.503  
143.093  
142.002  
139.881  
136.088  
136.027  
132.187  
130.263  
129.547  
129.352  
128.695  
128.069  
127.814  
127.292  
126.856  
125.698  
101.744  
86.618  
77.318  
77.000  
76.681  
31.889  
31.186  
21.542  
17.069

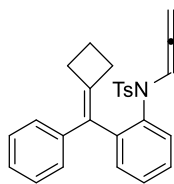

(<sup>13</sup>C NMR, 100 MHz, CDCl<sub>3</sub>)

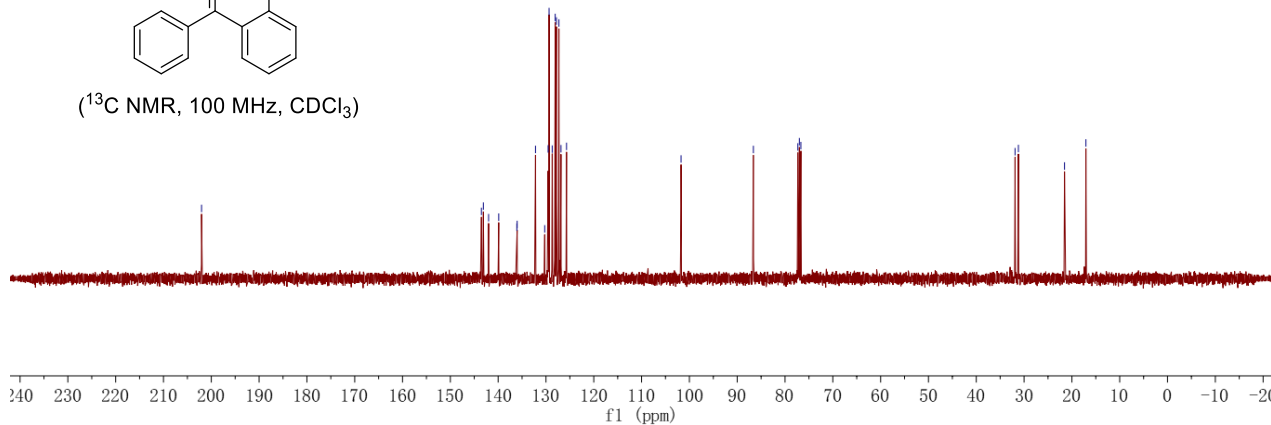

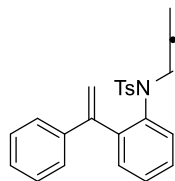

**4-methyl-N-(2-(1-phenylvinyl)phenyl)-N-(propa-1,2-dien-1-yl)benzenesulfonamide (1aa):**

Yield: 642 mg, 83%, yellow solid, m.p. 144-146 °C; Eluent: PE/EA = 30/1. <sup>1</sup>H NMR (400 MHz, CDCl<sub>3</sub>, TMS) δ 7.59 (d, *J* = 8.4 Hz, 2H), 7.41 – 7.30 (m, 2H), 7.30 – 7.22 (m, 7H), 7.15 (td, *J*<sub>1</sub> = 7.6 Hz, *J*<sub>2</sub> = 2.0 Hz, 1H), 6.61 (t, *J* = 6.0 Hz, 1H), 6.57 (d, *J* = 8.0 Hz, 1H), 5.71 (s, 1H), 5.45 (s, 1H), 4.89 (d, *J* = 6.0 Hz, 2H), 2.43 (s, 3H); <sup>13</sup>C{<sup>1</sup>H}-NMR (100 MHz, CDCl<sub>3</sub>, TMS) δ 202.1, 146.7, 143.7, 143.5, 141.3, 135.9, 135.6, 131.6, 129.5, 129.4, 128.8, 127.9, 127.7, 127.5, 127.5, 127.4, 117.1, 102.6, 87.0, 21.6; IR (neat): ν 3055, 2969, 1589, 1440, 1359, 1168, 1088, 1025, 959, 871, 770 cm<sup>-1</sup>; HRMS (ESI-TOF) Calcd for C<sub>20</sub>H<sub>19</sub>NO<sub>2</sub>Na [M+Na]<sup>+</sup>: 410.11852, found: 410.11906.

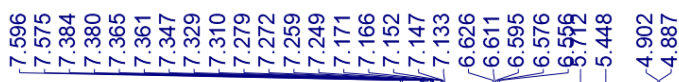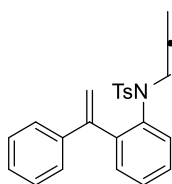

(<sup>1</sup>H NMR, 400 MHz, CDCl<sub>3</sub>)

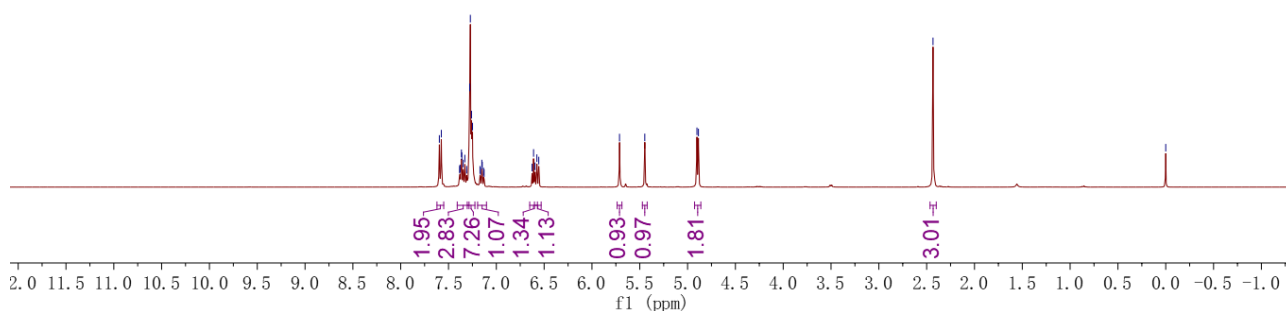

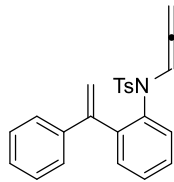

(<sup>13</sup>C NMR, 100 MHz, CDCl<sub>3</sub>)

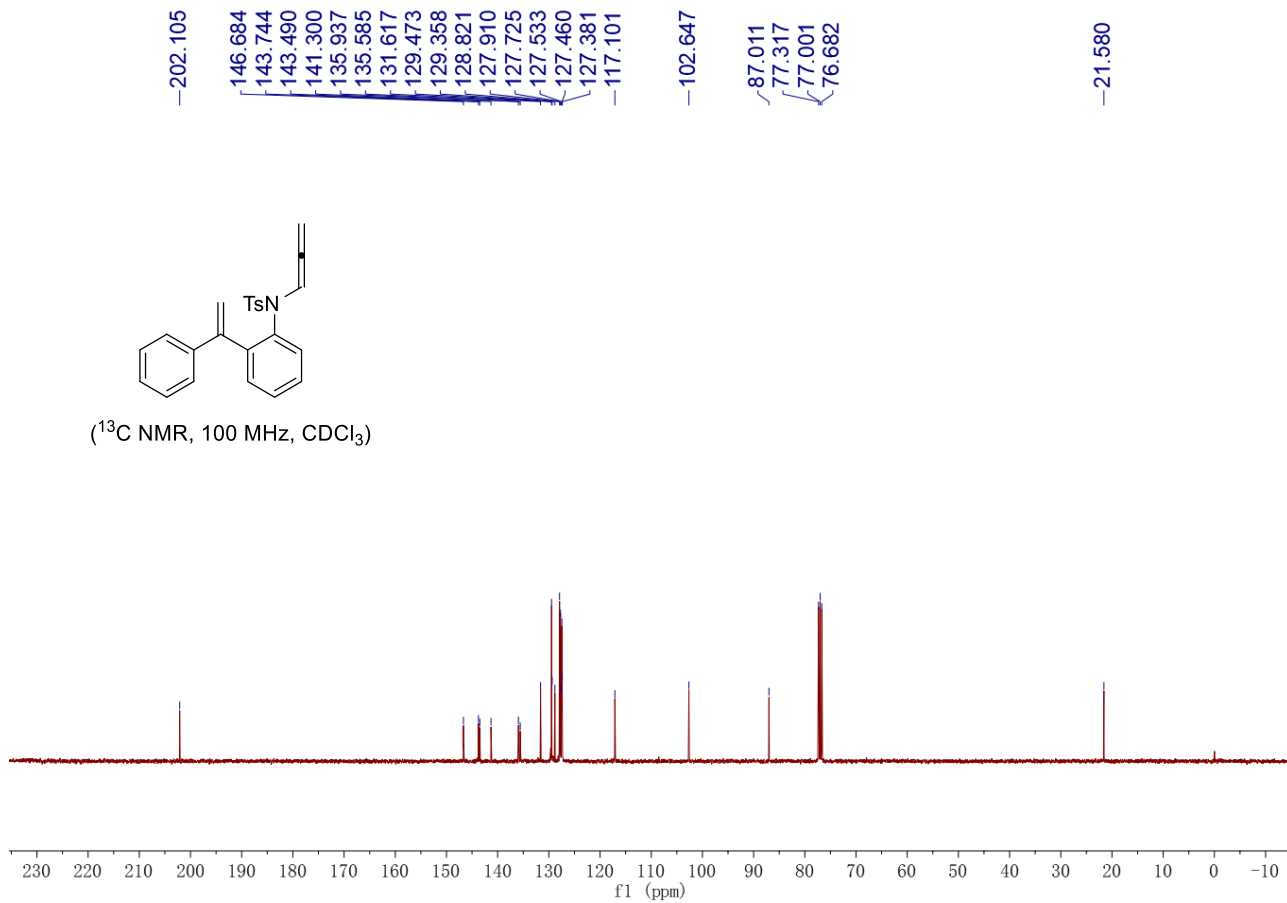

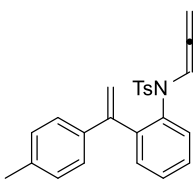

**4-methyl-N-(2-(1-(p-tolyl)vinyl)phenyl)-N-(propa-1,2-dien-1-yl)benzenesulfonamide (1ab):**

Yield: 674 mg, 84%, yellow solid, m.p. 157-159 °C; Eluent: PE/EA = 30/1. <sup>1</sup>H NMR (400 MHz, CDCl<sub>3</sub>, TMS) δ 7.59 (d, *J* = 6.8 Hz, 2H), 7.38 – 7.23 (m, 4H), 7.21 – 7.11 (m, 3H), 7.08 (d, *J* = 7.2 Hz, 2H), 6.66 (t, *J* = 6.1 Hz, 1H), 6.59 (d, *J* = 6.8 Hz, 1H), 5.69 (s, 1H), 5.40 (s, 1H), 4.90 (d, *J* = 6.1 Hz, 2H), 2.42 (s, 3H), 2.32 (s, 3H); <sup>13</sup>C{<sup>1</sup>H}-NMR (100 MHz, CDCl<sub>3</sub>, TMS) δ 202.1, 146.2, 143.7, 143.4, 138.3, 137.0, 135.8, 135.5, 131.5, 129.4, 129.2, 128.7, 128.3, 127.8, 127.4, 127.2, 116.1, 102.7, 87.0, 21.5, 21.1; IR (neat): ν 3018, 2950, 2921, 1600, 1508, 1456, 1351, 1164, 1089, 1061, 936, 810, 733 cm<sup>-1</sup>; HRMS (ESI-TOF) Calcd for C<sub>20</sub>H<sub>19</sub>NO<sub>2</sub>Na [M+Na]<sup>+</sup>: 424.13417, found: 424.13515.

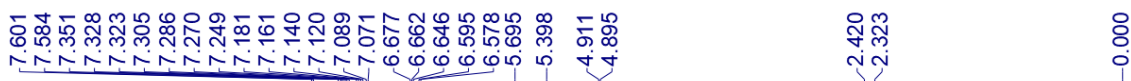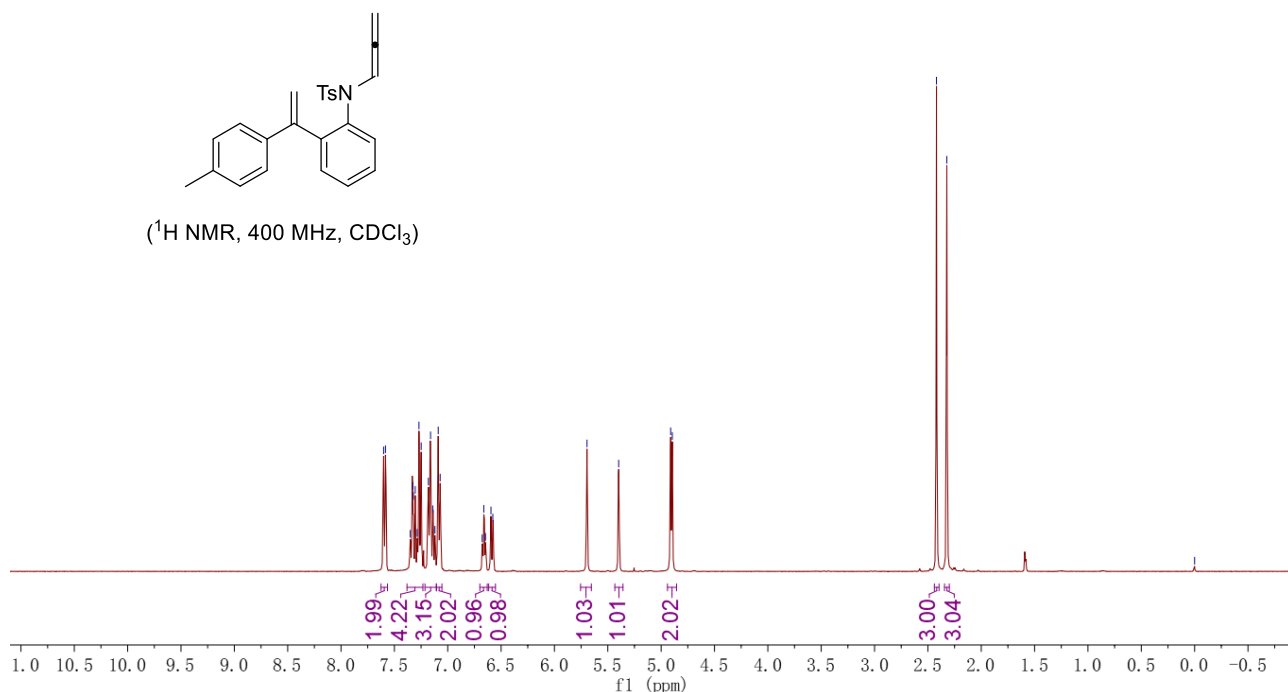

202.056  
146.152  
143.682  
143.442  
138.295  
136.976  
135.831  
135.499  
131.506  
129.389  
129.232  
128.663  
128.336  
127.780  
127.374  
127.209  
116.103  
102.703  
86.961  
77.318  
77.000  
76.682  
21.469  
21.068

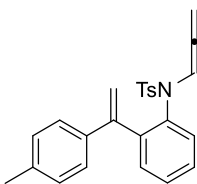

(<sup>13</sup>C NMR, 100 MHz, CDCl<sub>3</sub>)

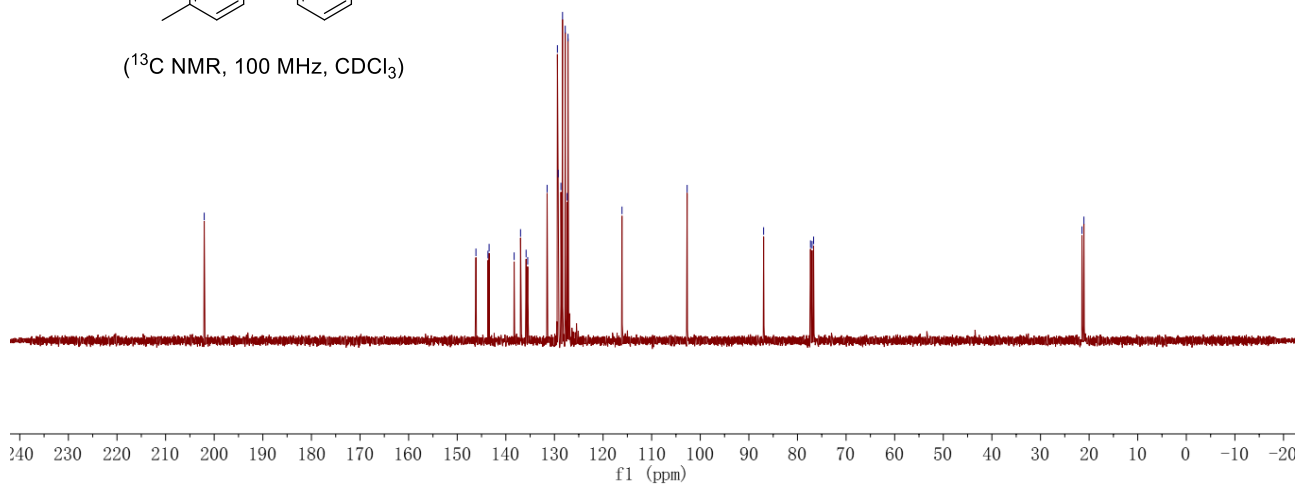

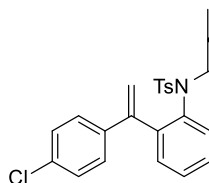

**4-methyl-N-(2-(1-(4-chlorophenyl)vinyl)phenyl)-N-(propa-1,2-dien-1-yl)benzenesulfonamide**

**(1ac):** Yield: 657 mg, 78%, yellow solid, m.p. 135-137 °C; Eluent: PE/EA = 30/1.  $^1\text{H}$  NMR (400 MHz,  $\text{CDCl}_3$ , TMS)  $\delta$  7.57 (d,  $J = 8.0$  Hz, 2H), 7.38 – 7.18 (m, 8H), 7.15 (td,  $J_1 = 7.2$  Hz,  $J_2 = 2.8$  Hz, 1H), 6.64 (td,  $J_1 = 6.4$  Hz,  $J_2 = 1.2$  Hz, 1H), 6.55 (d,  $J = 8.0$  Hz, 1H), 5.69 (s, 1H), 5.45 (s, 1H), 4.91 (d,  $J = 6.4$  Hz, 2H), 2.43 (s, 3H);  $^{13}\text{C}\{^1\text{H}\}$ -NMR (100 MHz,  $\text{CDCl}_3$ , TMS)  $\delta$  201.9, 145.6, 143.9, 143.0, 139.8, 135.6, 135.5, 133.1, 131.4, 129.5, 129.4, 128.9, 128.7, 127.8, 127.7, 117.5, 102.6, 87.1, 21.6; IR (neat):  $\nu$ 3071, 2966, 1610, 1597, 1487, 1437, 1361, 1165, 1091, 960, 834, 767  $\text{cm}^{-1}$ ; HRMS (ESI-TOF) Calcd for  $\text{C}_{20}\text{H}_{19}\text{NO}_2\text{Na}$   $[\text{M}+\text{Na}]^+$ : 444.07955, found: 444.07917.

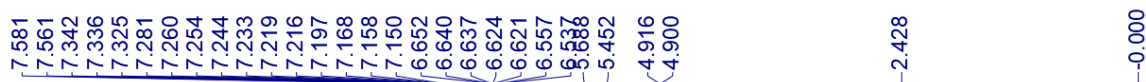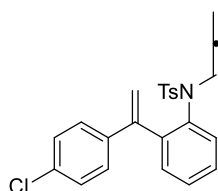

( $^1\text{H}$  NMR, 400 MHz,  $\text{CDCl}_3$ )

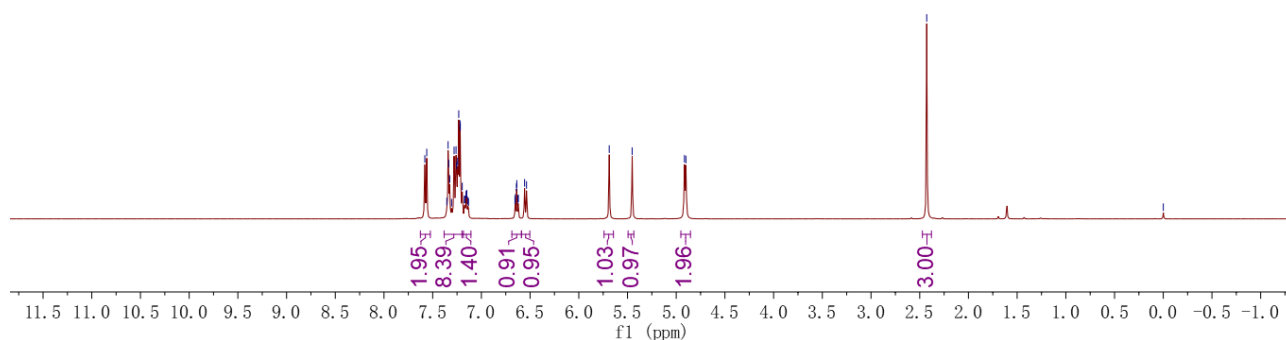

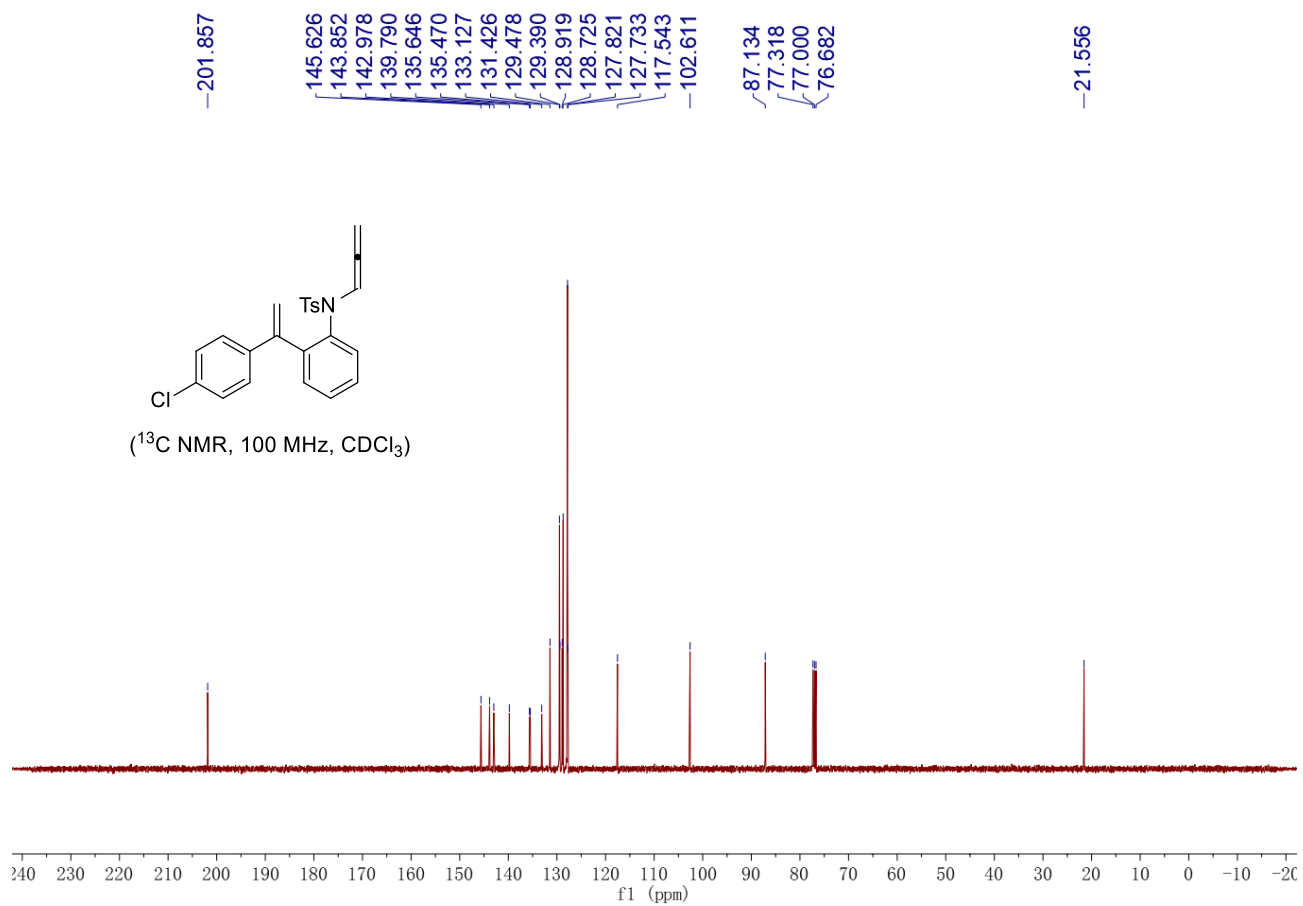



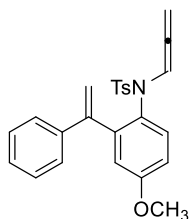

**4-methyl-*N*-(4-methoxy-2-(1-phenylvinyl)phenyl)-*N*-(propa-1,2-dien-1-yl)benzenesulfonamide (1ad):** Yield: 676 mg, 81%, yellow solid, m.p. 159-161 °C; Eluent: PE/EA = 30/1.  $^1\text{H}$  NMR (400 MHz,  $\text{CDCl}_3$ , TMS)  $\delta$  7.58 (d,  $J = 8.4$  Hz, 2H), 7.37 – 7.17 (m, 7H), 6.88 (d,  $J = 3.2$  Hz, 1H), 6.72 – 6.56 (m, 2H), 6.43 (d,  $J = 8.8$  Hz, 1H), 5.70 (s, 1H), 5.45 (s, 1H), 4.91 (d,  $J = 6.0$  Hz, 2H), 3.77 (s, 3H), 2.43 (s, 3H);  $^{13}\text{C}\{^1\text{H}\}$ -NMR (100 MHz,  $\text{CDCl}_3$ , TMS)  $\delta$  201.9, 159.2, 146.6, 144.7, 143.6, 141.0, 135.7, 130.3, 129.4, 128.0, 127.8, 127.6, 127.4, 127.3, 116.9, 116.3, 112.9, 102.8, 87.0, 55.3, 21.5; IR (neat):  $\nu$  3079, 3032, 2956, 1594, 1484, 1358, 1234, 1168, 1041, 941, 895, 702  $\text{cm}^{-1}$ ; HRMS (ESI-TOF) Calcd for  $\text{C}_{20}\text{H}_{19}\text{NO}_2\text{Na}$   $[\text{M}+\text{Na}]^+$ : 440.12909, found: 440.12907.

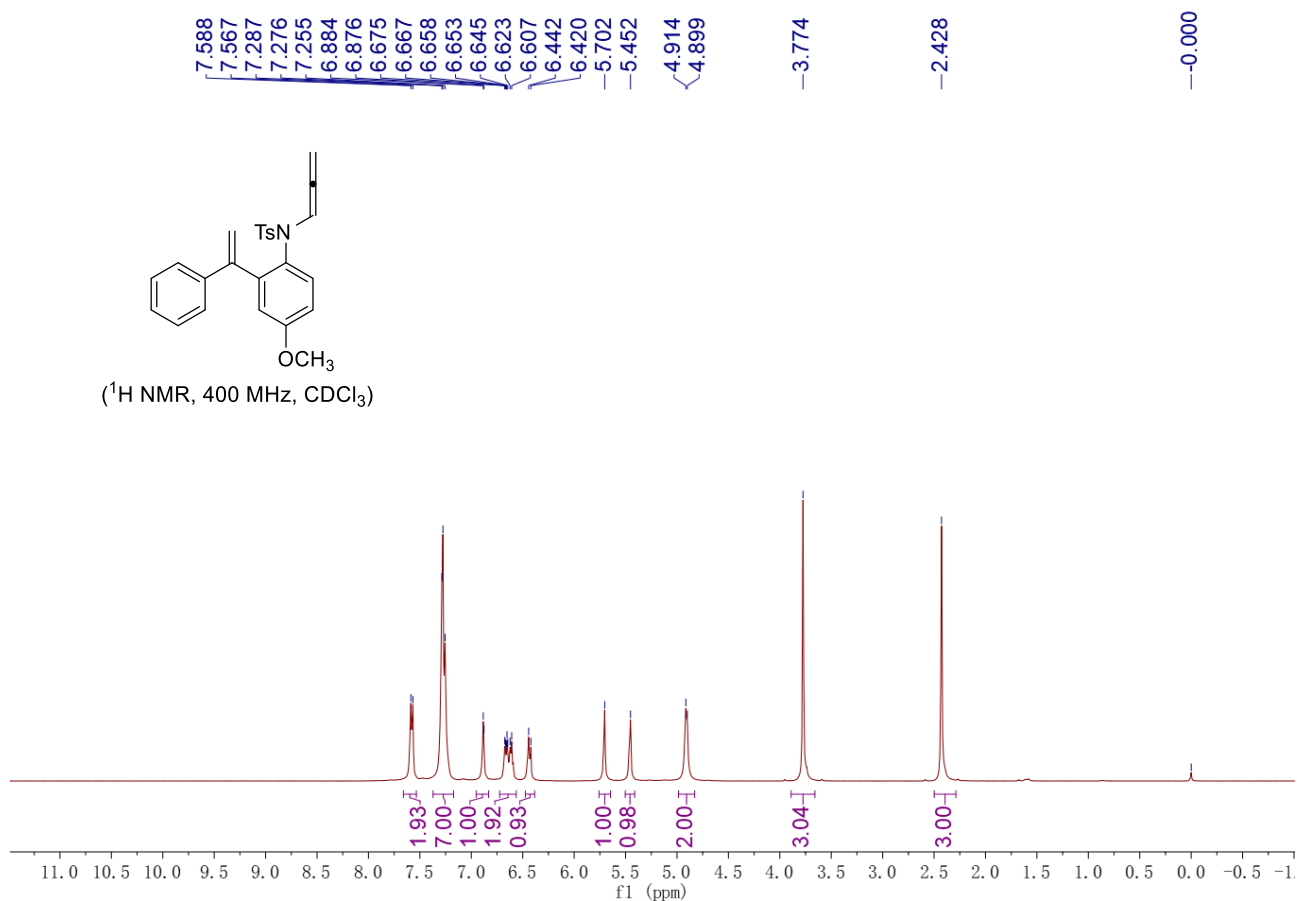

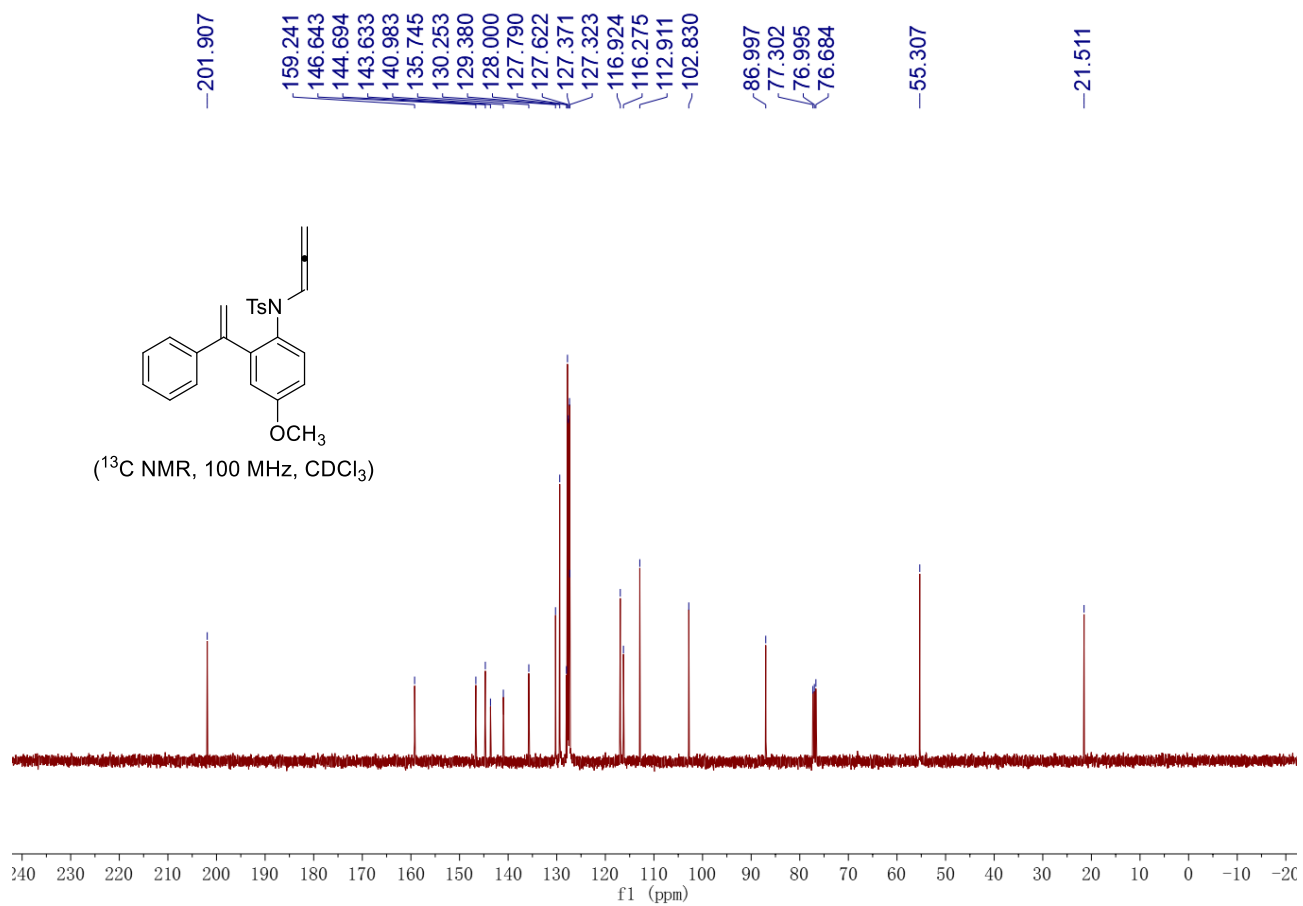

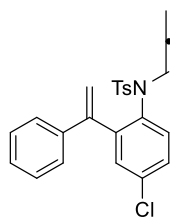

**4-methyl-N-(4-chloro-2-(1-phenylvinyl)phenyl)-N-(propa-1,2-dien-1-yl)benzenesulfonamide**

(**1ae**): Yield: 632 mg, 75%, yellow solid, m.p. 154-156 °C; Eluent: PE/EA = 30/1.  $^1\text{H}$  NMR (400 MHz,  $\text{CDCl}_3$ , TMS)  $\delta$  7.57 (d,  $J = 8.0$  Hz, 2H), 7.38 (d,  $J = 2.4$  Hz, 1H), 7.34 – 7.18 (m, 7H), 7.12 (dd,  $J_1 = 8.4$  Hz,  $J_2 = 2.4$  Hz, 1H), 6.58 (t,  $J = 6.0$  Hz, 1H), 6.46 (d,  $J = 8.4$  Hz, 1H), 5.72 (s, 1H), 5.45 (s, 1H), 4.93 (d,  $J = 6.0$  Hz, 2H), 2.44 (s, 3H);  $^{13}\text{C}\{^1\text{H}\}$ -NMR (100 MHz,  $\text{CDCl}_3$ , TMS)  $\delta$  201.7, 145.6, 145.1, 144.0, 140.5, 135.3, 134.5, 134.0, 131.3, 130.5, 129.5, 127.7, 127.7, 127.6, 127.6, 127.3, 117.7, 102.4, 87.4, 21.5; IR (neat):  $\nu$  3094, 3050, 2972, 1594, 1477, 1435, 1358, 1268, 1167, 1157, 1087, 960, 815, 777  $\text{cm}^{-1}$ ; HRMS (ESI-TOF) Calcd for  $\text{C}_{20}\text{H}_{19}\text{NO}_2\text{Na}$   $[\text{M}+\text{Na}]^+$ : 444.07955, found: 444.07954.

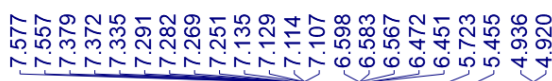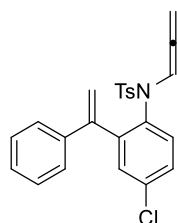

( $^1\text{H}$  NMR, 400 MHz,  $\text{CDCl}_3$ )

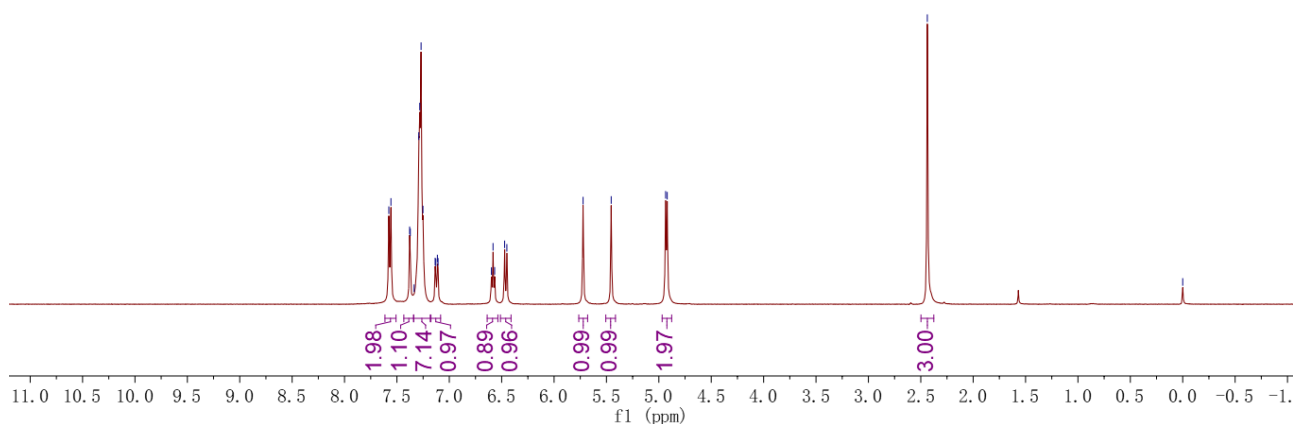

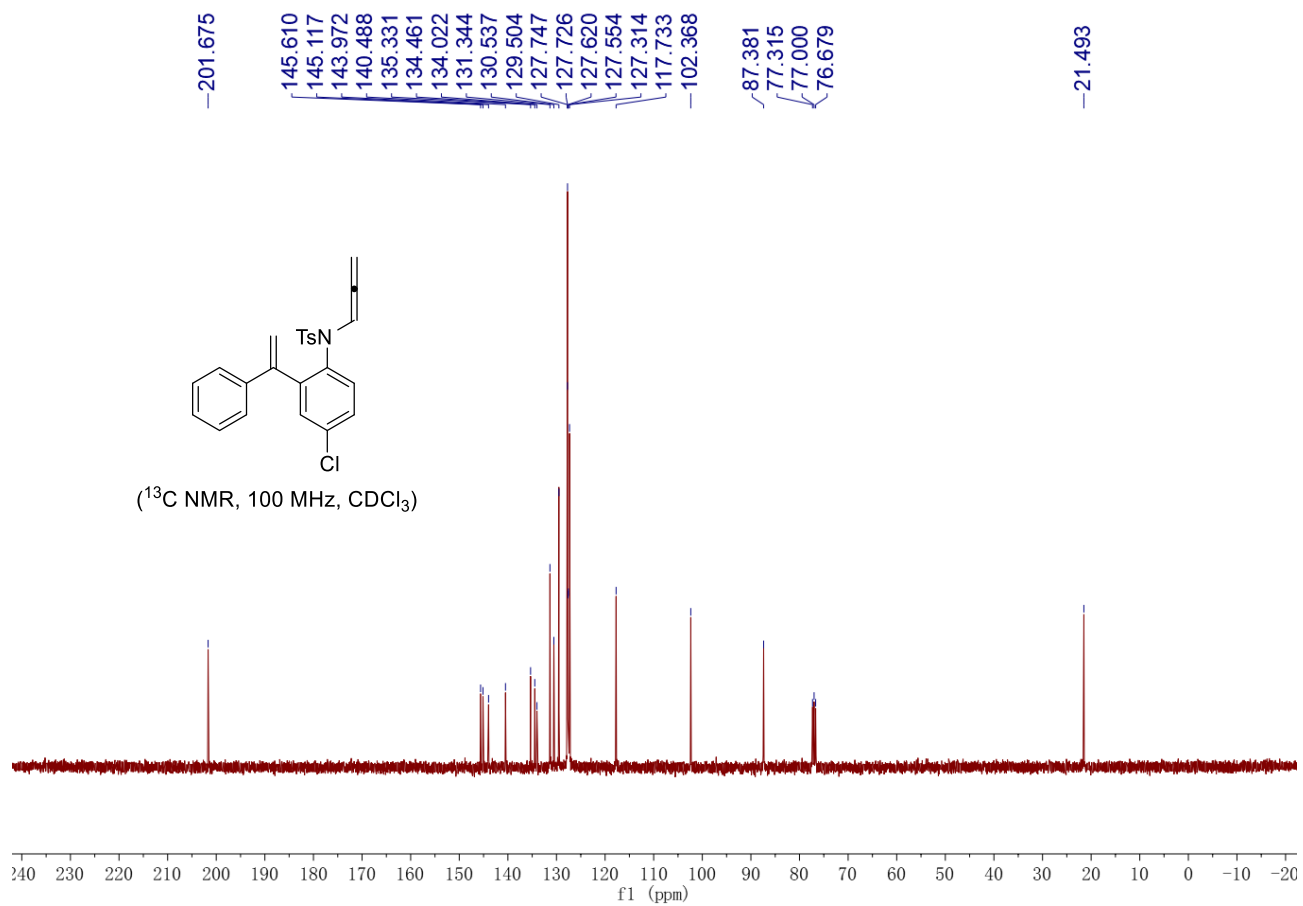

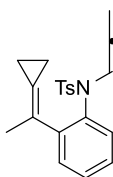

**N-(2-(1-cyclopropylideneethyl)phenyl)-4-methyl-N-(propa-1,2-dien-1-yl)benzenesulfonamide**

**(1af)**: Yield: 632 mg, 61%, yellow oil; Eluent: PE/EA = 30/1.  $^1\text{H}$  NMR (400 MHz,  $\text{CDCl}_3$ , TMS)  $\delta$  7.62 (d,  $J = 8.6$  Hz, 2H), 7.37 (d,  $J = 7.6$  Hz, 1H), 7.29 (d,  $J = 8.6$  Hz, 3H), 7.04 (m, 2H), 6.52 (d,  $J = 8.0$  Hz, 1H), 4.98 (d,  $J = 6.4$  Hz, 2H), 2.44 (s, 3H), 2.25 (s, 3H), 1.22 – 1.10 (m, 4H).;  $^{13}\text{C}\{^1\text{H}\}$ -NMR (100 MHz,  $\text{CDCl}_3$ , TMS)  $\delta$  201.7, 144.5, 143.7, 135.9, 134.6, 130.2, 129.4, 129.0, 128.7, 127.8, 126.4, 123.0, 123.0, 103.1, 87.2, 21.9, 21.6, 4.3, 2.3; IR (neat):  $\nu$  3052, 2969, 2912, 1735, 1594, 1440, 1356, 1164, 1090, 755, 734, 704  $\text{cm}^{-1}$ ; HRMS (ESI-TOF) Calcd for  $\text{C}_{20}\text{H}_{19}\text{NO}_2\text{Na}$   $[\text{M}+\text{Na}]^+$ : 374.11852, found: 374.11789.

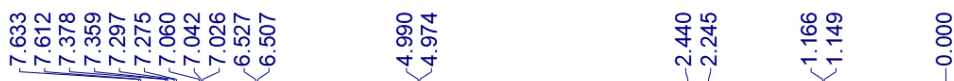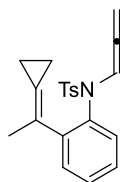

( $^1\text{H}$  NMR, 400 MHz,  $\text{CDCl}_3$ )

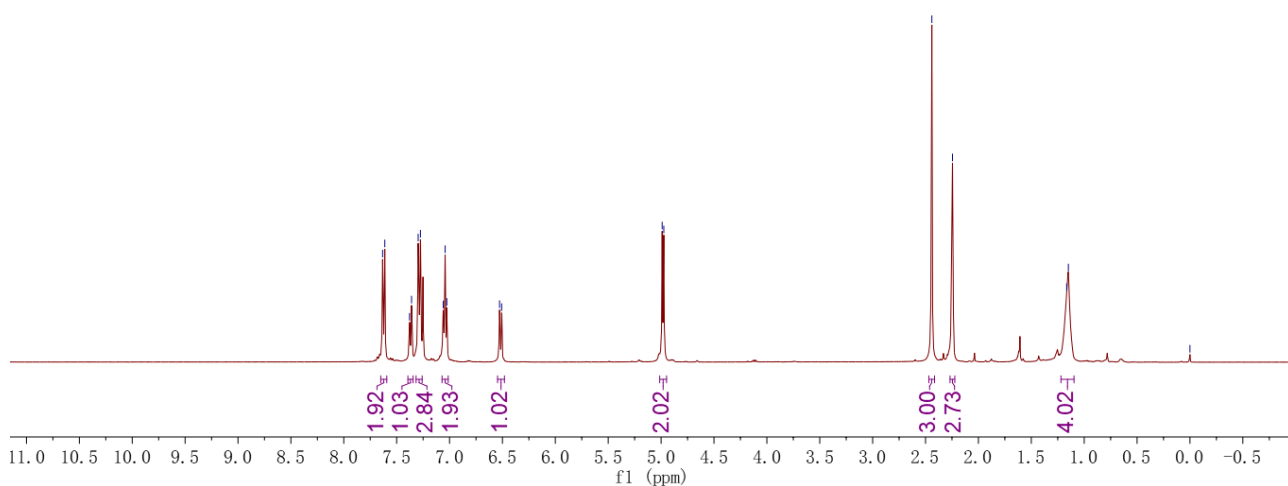

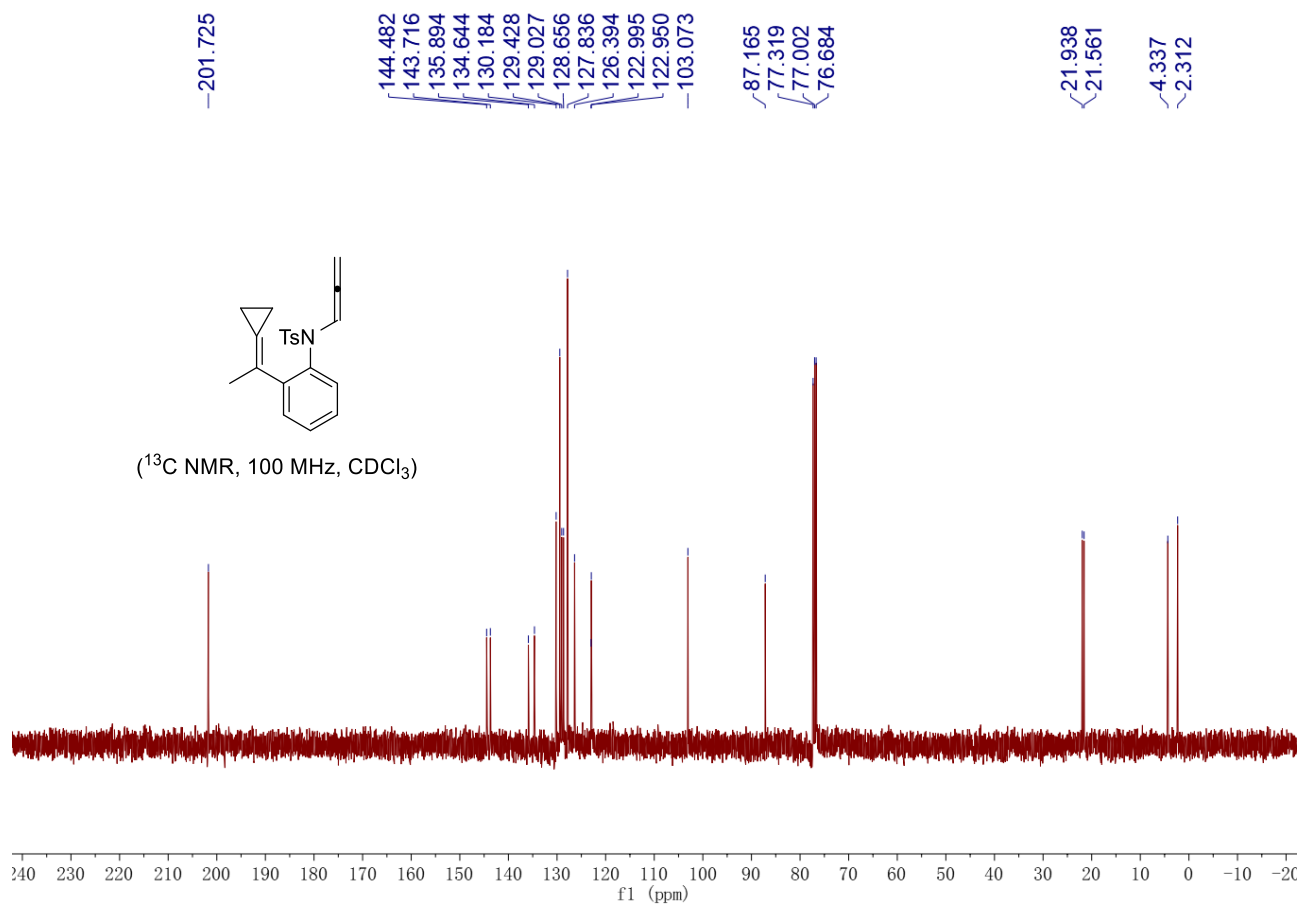

## 6. Characterization Data of Products.

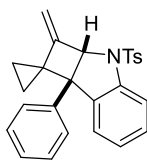

**2-methylene-7b-phenyl-3-tosyl-2,2a,3,7b-tetrahydrospiro[cyclobuta[*b*]indole-1,1'-cyclopropane] (2a):** Yield: 54 mg, 65%, white solid, m.p. 152-154 °C; Eluent: PE/EA = 30/1. <sup>1</sup>H NMR (400 MHz, CDCl<sub>3</sub>, TMS) δ 7.82 (d, *J* = 8.0 Hz, 1H), 7.35 (td, *J*<sub>1</sub> = 7.6 Hz, *J*<sub>2</sub> = 1.2 Hz, 1H), 7.29 – 7.01 (m, 7H), 6.88 – 6.78 (m, 2H), 6.73 (d, *J* = 8.0 Hz, 2H), 5.27 (s, 1H), 5.19 (s, 1H), 4.76 (s, 1H), 2.17 (s, 3H), 1.04 (m, 1H), 0.93 (m, 1H), 0.80 – 0.70 (m, 2H); <sup>13</sup>C{<sup>1</sup>H}-NMR (100 MHz, CDCl<sub>3</sub>, TMS) δ 154.4, 143.5, 143.3, 139.8, 136.2, 133.8, 129.1, 128.4, 127.8, 127.1, 126.8, 125.9, 125.2, 119.3, 105.1, 72.9, 58.0, 39.7, 21.3, 18.3, 14.7; IR (neat): ν 3055, 2959, 2917, 2844, 1591, 1453, 1353, 1171, 1085, 1052, 962, 890, 742, 669 cm<sup>-1</sup>; HRMS (ESI-TOF) Calcd for C<sub>20</sub>H<sub>19</sub>NO<sub>2</sub>Na [M+Na]<sup>+</sup>: 436.13417, found: 436.13434.

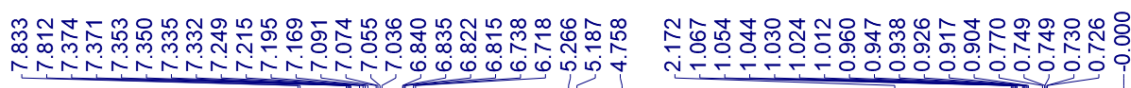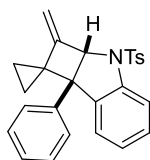

(<sup>1</sup>H NMR, 400 MHz, CDCl<sub>3</sub>)

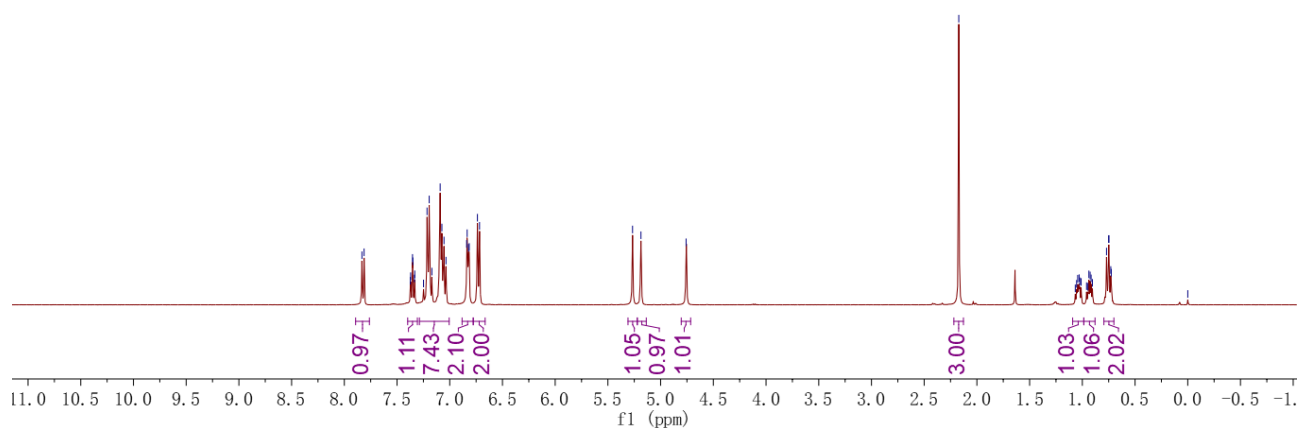

154.436  
143.521  
143.321  
139.792  
136.198  
133.806  
129.067  
128.392  
127.798  
127.089  
126.832  
125.904  
125.220  
119.330  
-105.091

77.318  
77.000  
76.681  
72.949

-58.021

-39.681

~21.323  
~18.308  
~14.714

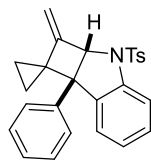

(<sup>13</sup>C NMR, 100 MHz, CDCl<sub>3</sub>)

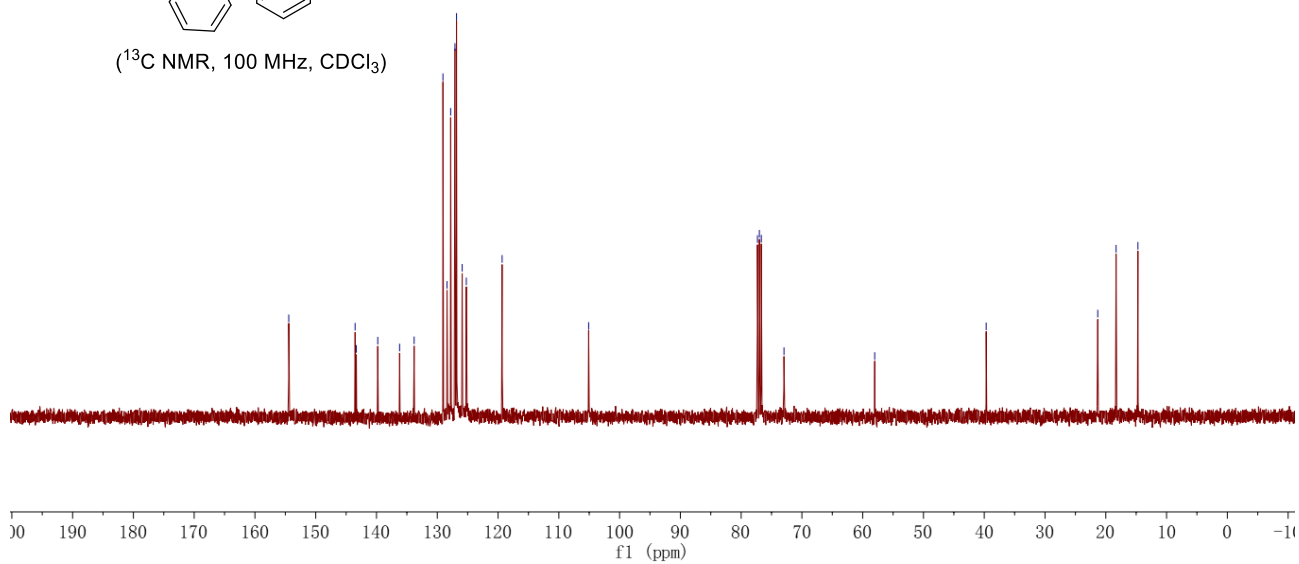



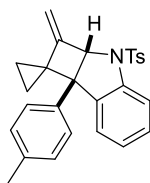

**2-methylene-7b-(*p*-tolyl)-3-tosyl-2,2a,3,7b-tetrahydrospiro[cyclobuta[*b*]indole-1,1'-cyclopropane] (2b):** Yield: 59 mg, 68%, white solid, m.p. 192-194 °C; Eluent: PE/EA = 30/1. <sup>1</sup>H NMR (400 MHz, CDCl<sub>3</sub>, TMS) δ 7.81 (d, *J* = 8.0 Hz, 1H), 7.33 (t, *J* = 8.0 Hz, 1H), 7.25 – 7.13 (m, 3H), 7.03 (d, *J* = 7.6 Hz, 1H), 6.89 (d, *J* = 7.6 Hz, 2H), 6.77 – 6.64 (m, 4H), 5.25 (s, 1H), 5.17 (s, 1H), 4.74 (s, 1H), 2.29 (s, 3H), 2.18 (s, 3H), 1.07 – 0.88 (m, 2H), 0.80 – 0.67 (m, 2H); <sup>13</sup>C{<sup>1</sup>H}-NMR (100 MHz, CDCl<sub>3</sub>, TMS) δ 154.5, 143.5, 143.3, 136.9, 136.4, 135.5, 134.0, 128.9, 128.4, 128.3, 127.0, 126.8, 125.1, 119.2, 104.9, 72.9, 57.8, 39.5, 21.3, 20.9, 18.2, 14.5; IR (neat): ν 3073, 3024, 2992, 2919, 1594, 1456, 1353, 1184, 1169, 1088, 931, 819, 758 cm<sup>-1</sup>; HRMS (ESI-TOF) Calcd for C<sub>20</sub>H<sub>19</sub>NO<sub>2</sub>Na [M+Na]<sup>+</sup>: 450.14982, found: 450.15064.

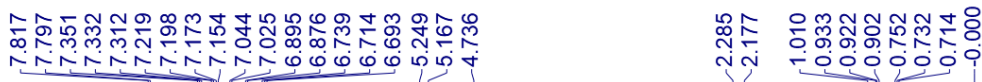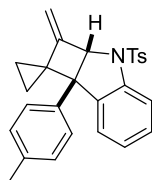

(<sup>1</sup>H NMR, 400 MHz, CDCl<sub>3</sub>)

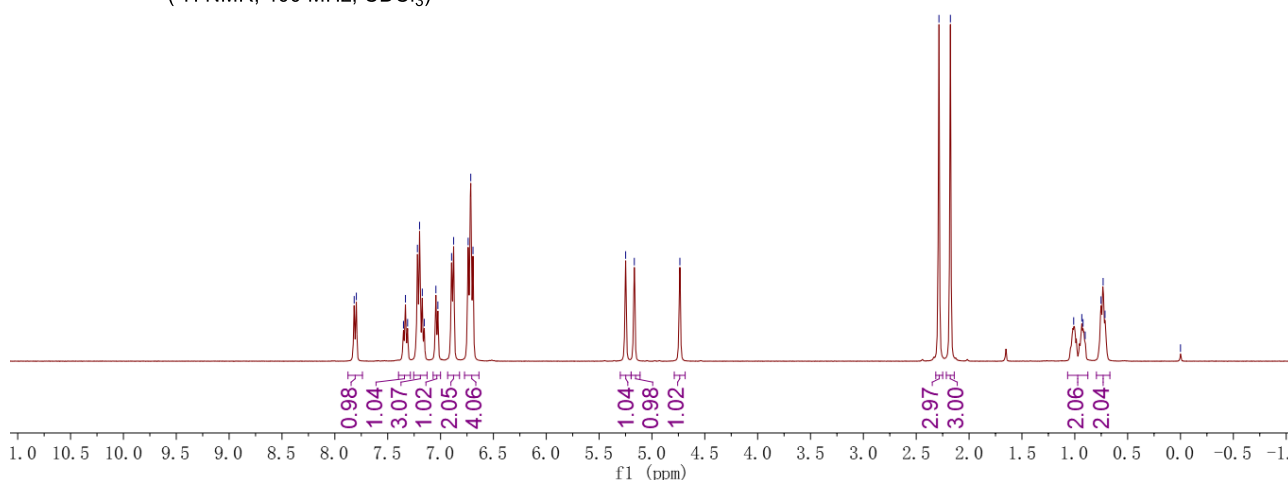

154.531  
143.527  
143.260  
136.852  
136.420  
135.490  
133.960  
128.944  
128.433  
128.283  
126.963  
126.789  
125.148  
119.217  
-104.893

77.318  
77.000  
76.682  
72.940

-57.761

-39.521

21.265  
20.858  
18.181  
14.480

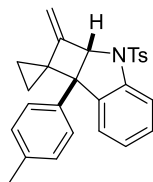

(<sup>13</sup>C NMR, 100 MHz, CDCl<sub>3</sub>)

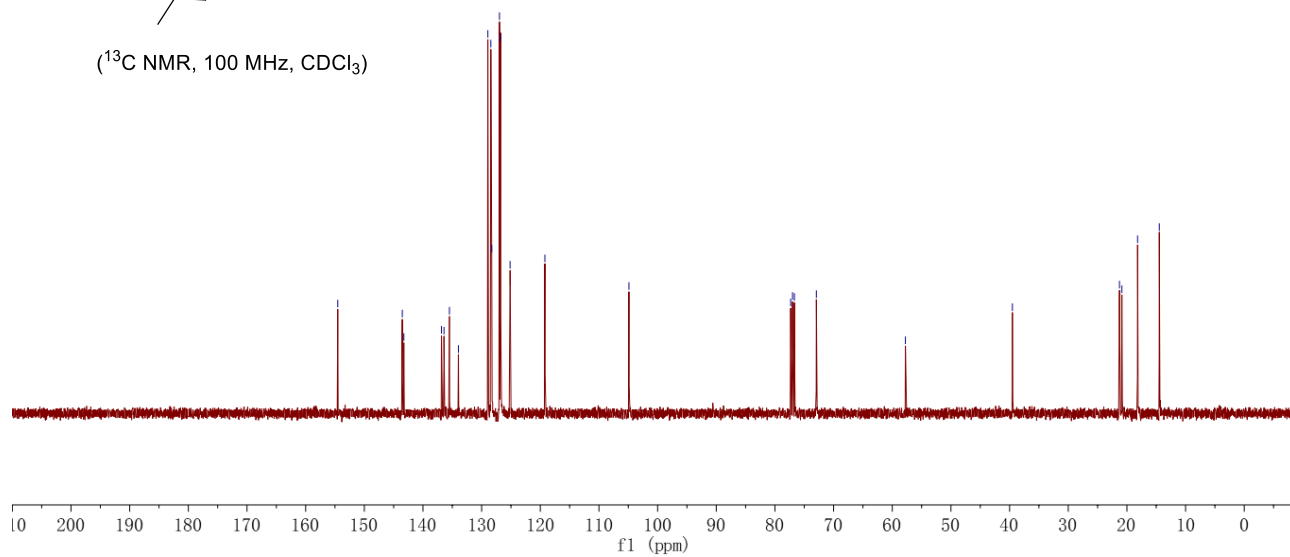

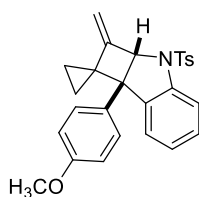

**7b-(4-methoxyphenyl)-2-methylene-3-tosyl-2,2a,3,7b-tetrahydrospiro[cyclobuta[b]indole-1,1'-cyclopropane] (2c):** Yield: 66 mg, 74%, white solid, m.p. 196-198 °C; Eluent: PE/EA = 30/1.  $^1\text{H}$  NMR (400 MHz,  $\text{CDCl}_3$ , TMS)  $\delta$  7.81 (d,  $J = 8.0$  Hz, 1H), 7.35 (t,  $J = 7.2$  Hz, 1H), 7.28 – 7.14 (m, 3H), 7.03 (d,  $J = 7.2$  Hz, 1H), 6.82 – 6.71 (m, 4H), 6.62 (d,  $J = 8.8$  Hz, 2H), 5.25 (s, 1H), 5.15 (s, 1H), 4.75 (s, 1H), 3.77 (s, 3H), 2.19 (s, 3H), 1.07 – 0.86 (m, 2H), 0.79 – 0.67 (m, 2H);  $^{13}\text{C}\{^1\text{H}\}$ -NMR (100 MHz,  $\text{CDCl}_3$ , TMS)  $\delta$  157.8, 154.5, 143.5, 143.3, 136.5, 134.0, 132.1, 129.0, 128.3, 128.3, 126.9, 126.8, 125.2, 119.3, 113.1, 105.0, 73.1, 57.5, 55.1, 39.6, 21.3, 18.2, 14.5; IR (neat):  $\nu$  3052, 2959, 2904, 1607, 1510, 1456, 1351, 1251, 1087, 1032, 881, 764, 660  $\text{cm}^{-1}$ ; HRMS (ESI-TOF) Calcd for  $\text{C}_{20}\text{H}_{19}\text{NO}_2\text{Na}$   $[\text{M}+\text{Na}]^+$ : 466.14474, found: 466.14485.

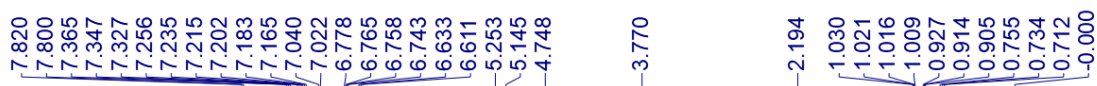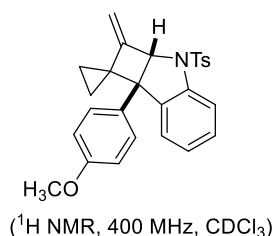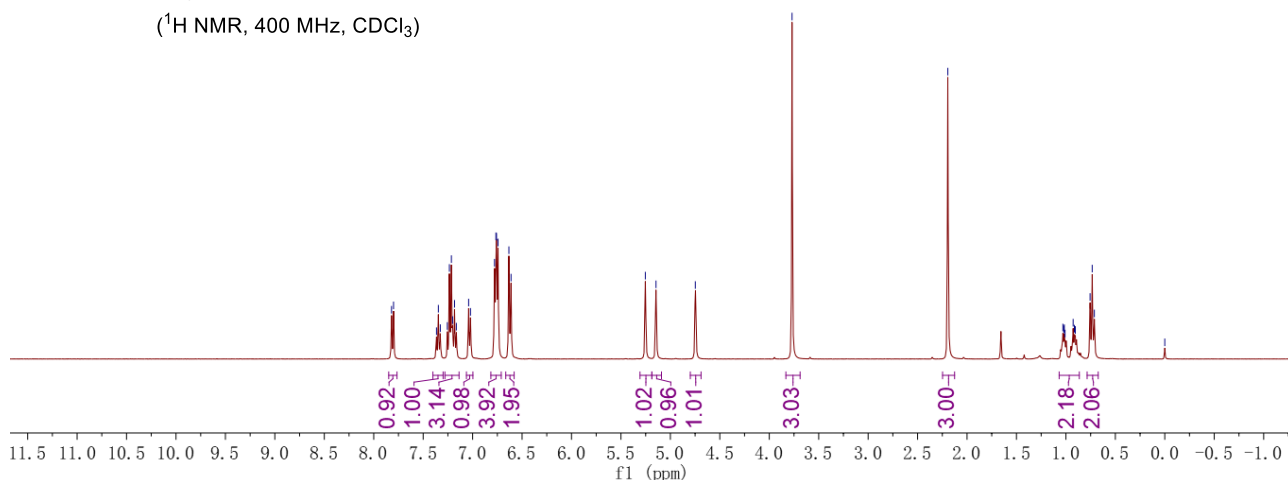

~157.785  
~154.461  
143.512  
143.266  
136.534  
133.995  
132.096  
129.010  
128.339  
128.275  
126.857  
126.767  
125.182  
119.282  
113.109  
105.005  
77.318  
77.001  
76.682  
73.146  
57.486  
55.148  
-39.609  
21.301  
18.178  
14.514

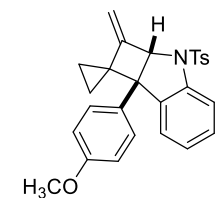

(<sup>13</sup>C NMR, 100 MHz, CDCl<sub>3</sub>)

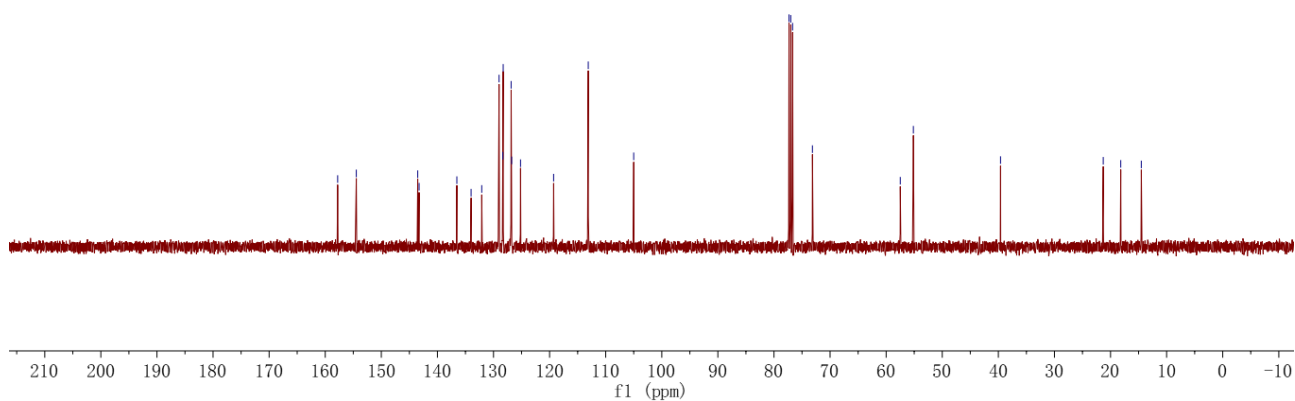

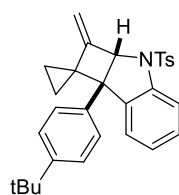

**7b-(4-(tert-butyl)phenyl)-2-methylene-3-tosyl-2,2a,3,7b-tetrahydrospiro[cyclobuta[b]indole-1,1'-cyclopropane] (2d):** Yield: 60 mg, 64%, pale yellow oil; Eluent: PE/EA = 30/1.  $^1\text{H}$  NMR (400 MHz,  $\text{CDCl}_3$ , TMS)  $\delta$  7.81 (d,  $J = 8.0$  Hz, 1H), 7.31 (t,  $J = 8.0$  Hz, 1H), 7.22 (d,  $J = 7.6$  Hz, 2H), 7.19 – 7.07 (m, 3H), 7.02 (d,  $J = 7.6$  Hz, 1H), 6.80 – 6.68 (m, 4H), 5.24 (s, 1H), 5.20 (s, 1H), 4.73 (s, 1H), 2.19 (s, 3H), 1.30 (s, 9H), 1.09 – 0.93 (m, 2H), 0.79 – 0.65 (m, 2H);  $^{13}\text{C}\{^1\text{H}\}$ -NMR (100 MHz,  $\text{CDCl}_3$ , TMS)  $\delta$  154.6, 148.8, 143.2, 143.1, 136.7, 136.4, 134.0, 128.8, 128.1, 126.8, 126.7, 126.6, 125.1, 124.5, 119.0, 104.8, 72.7, 57.6, 39.5, 34.1, 31.2, 21.4, 18.2, 14.8; IR (neat):  $\nu$  3068, 2964, 2859, 1597, 1456, 1355, 1089, 876, 755, 659  $\text{cm}^{-1}$ ; HRMS (ESI-TOF) Calcd for  $\text{C}_{20}\text{H}_{19}\text{NO}_2\text{Na}$   $[\text{M}+\text{Na}]^+$ : 492.19677, found: 492.19746.

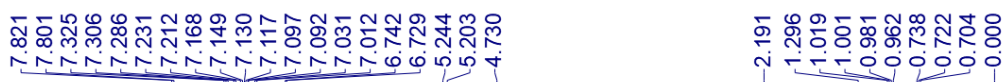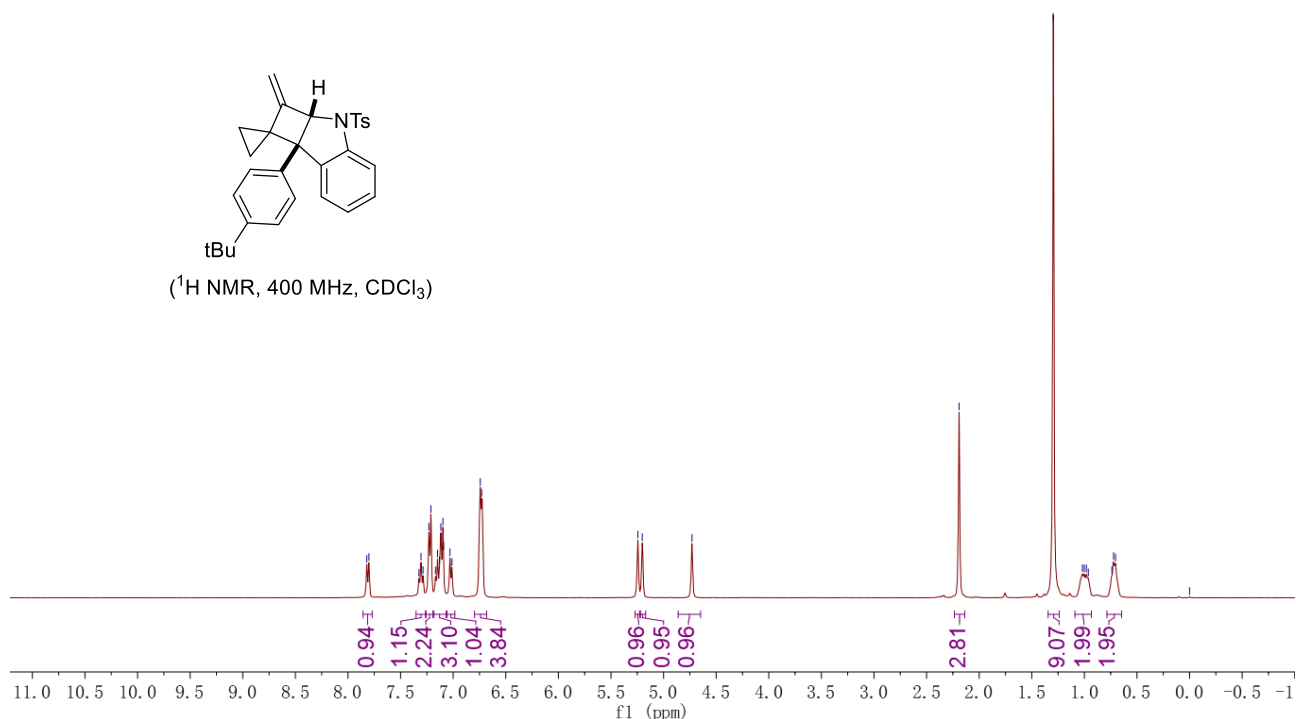

154.647  
 148.759  
 143.154  
 143.103  
 136.748  
 136.403  
 133.986  
 128.832  
 128.149  
 126.783  
 126.653  
 126.563  
 125.092  
 124.518  
 118.955  
 -104.802  
  
 77.319  
 77.000  
 76.681  
 72.730  
  
 -57.579  
  
 -39.515  
 -34.128  
 -31.209  
  
 -21.356  
 -18.243  
 -14.779

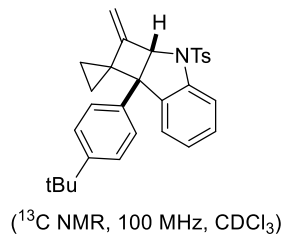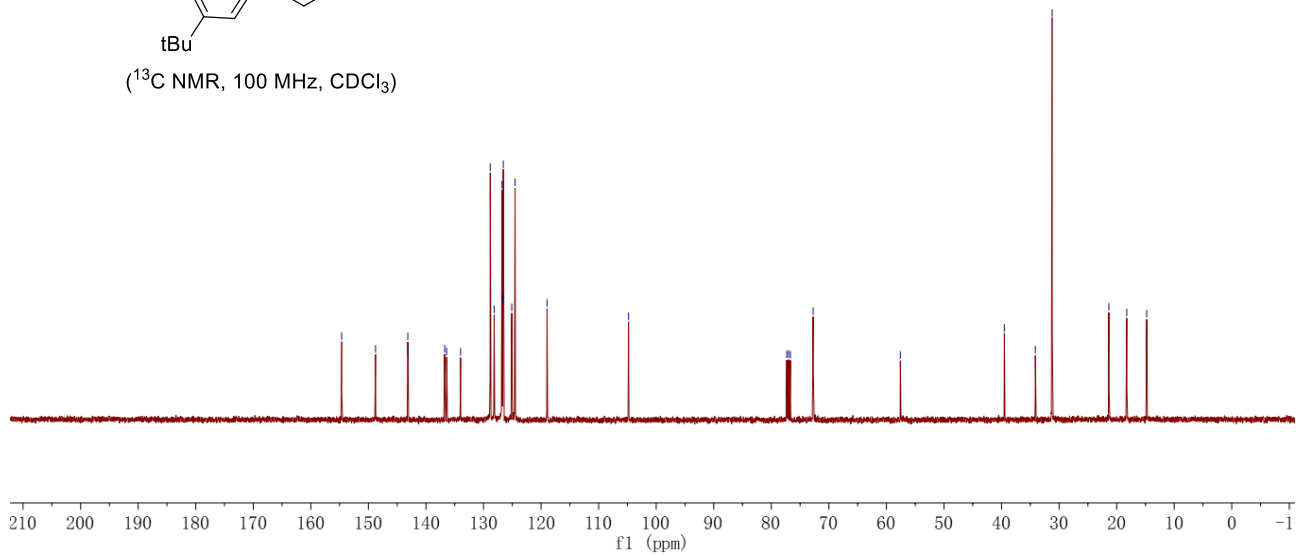

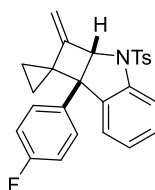

**7b-(4-fluorophenyl)-2-methylene-3-tosyl-2,2a,3,7b-tetrahydrospiro[cyclobuta[b]indole-1,1'-cyclopropane] (2e):** Yield: 56 mg, 65%, white solid, m.p. 177-179 °C; Eluent: PE/EA = 30/1.  $^1\text{H}$  NMR (400 MHz,  $\text{CDCl}_3$ , TMS)  $\delta$  7.83 (d,  $J = 8.4$  Hz, 1H), 7.37 (t,  $J = 8.0$  Hz, 1H), 7.25 – 7.16 (m, 3H), 7.02 (d,  $J = 7.6$  Hz, 1H), 6.88 – 6.68 (m, 6H), 5.27 (s, 1H), 5.12 (s, 1H), 4.76 (s, 1H), 2.20 (s, 3H), 1.09 – 1.00 (m, 1H), 0.93 – 0.84 (m, 1H), 0.81 – 0.70 (m, 2H);  $^{13}\text{C}\{^1\text{H}\}$ -NMR (100 MHz,  $\text{CDCl}_3$ , TMS)  $\delta$  161.2 (d,  $J = 244.6$  Hz), 154.1, 143.8, 143.5, 136.1, 135.9 (d,  $J = 3.3$  Hz), 134.0, 129.1, 128.9 (d,  $J = 8.1$  Hz), 128.7, 127.0, 126.8, 125.5, 119.7, 144.6 (d,  $J = 21.3$  Hz), 105.5, 73.3, 57.6, 39.8, 21.3, 18.3, 14.7;  $^{19}\text{F}$  NMR (376 MHz,  $\text{CDCl}_3$ )  $\delta$  -116.4; IR (neat):  $\nu$  3060, 2985, 1594, 1500, 1352, 1218, 1171, 1085, 1051, 890, 657  $\text{cm}^{-1}$ ; HRMS (ESI-TOF) Calcd for  $\text{C}_{20}\text{H}_{19}\text{NO}_2\text{Na}$   $[\text{M}+\text{Na}]^+$ : 454.12475, found: 454.12582.

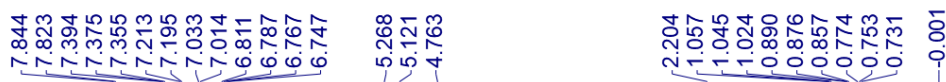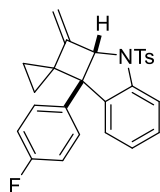

( $^1\text{H}$  NMR, 400 MHz,  $\text{CDCl}_3$ )

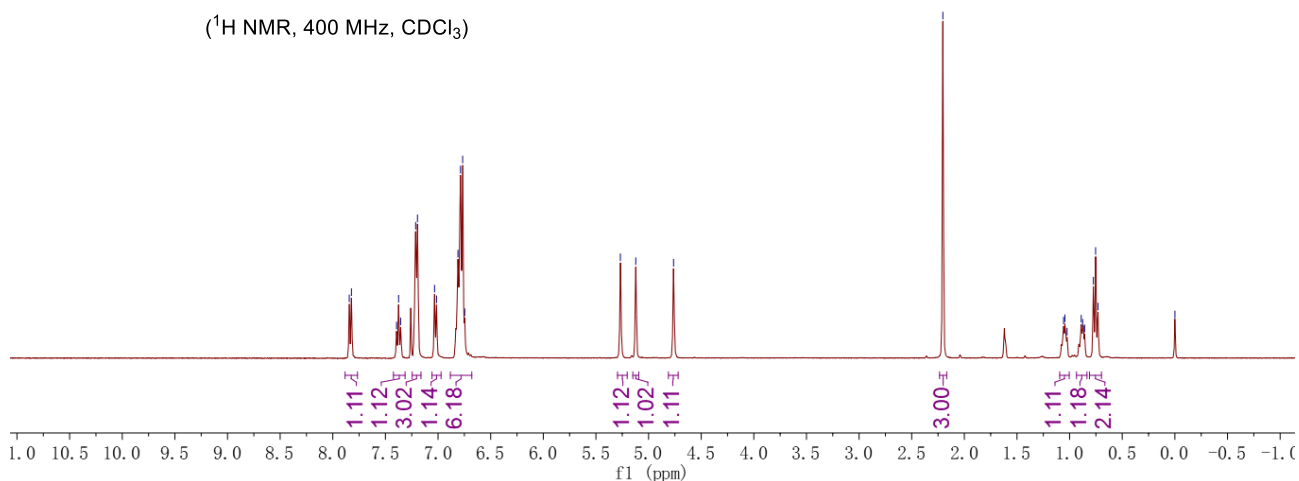

162.384  
159.938  
154.053  
143.837  
143.456  
136.120  
135.878  
135.845  
133.962  
129.093  
128.935  
128.854  
128.660  
126.951  
126.775  
125.472  
119.677  
114.710  
114.497  
105.460

77.375  
77.057  
76.739  
73.326

57.562

39.774

21.318  
18.330  
14.740

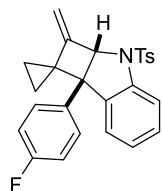

(<sup>13</sup>C NMR, 100 MHz, CDCl<sub>3</sub>)

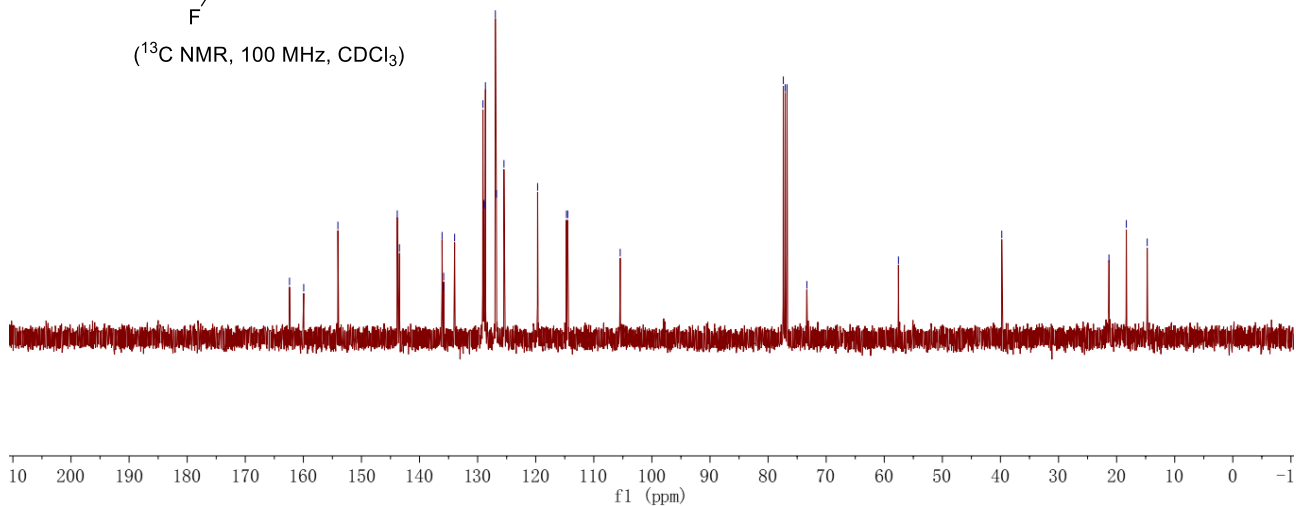

--116.448

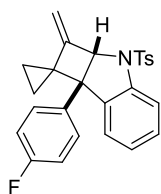

(<sup>19</sup>F NMR, 376 MHz, CDCl<sub>3</sub>)

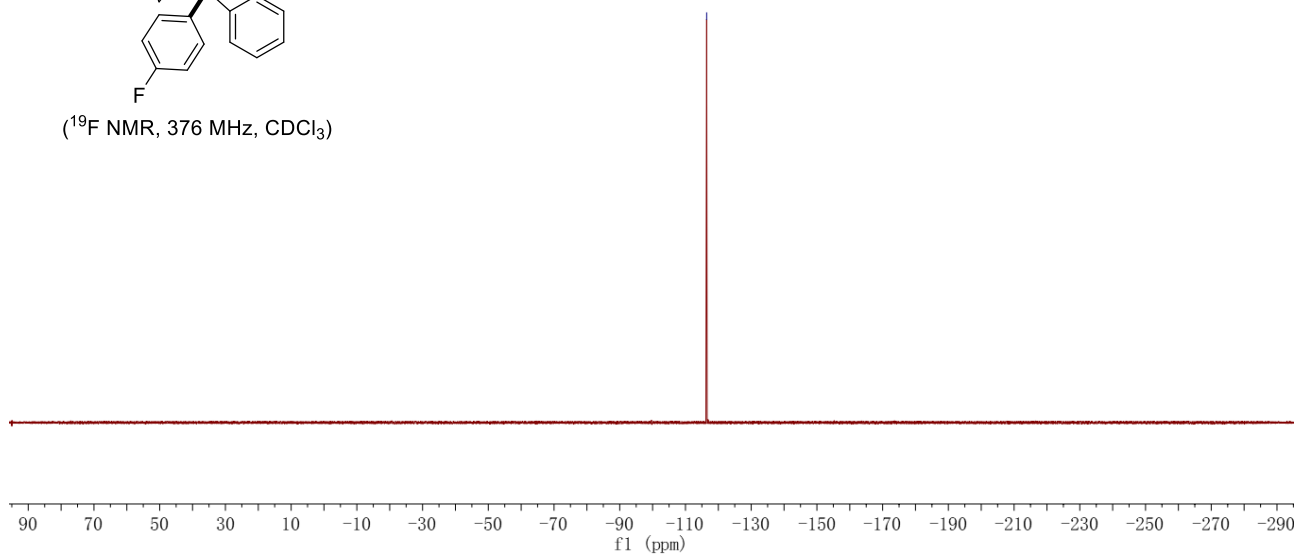



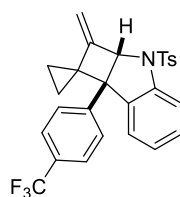

**2-methylene-3-tosyl-7b-(4-(trifluoromethyl)phenyl)-2,2a,3,7b-tetrahydrospiro[cyclobuta[b]indole-1,1'-cyclopropane] (2f):** Yield: 62 mg, 64%, white solid, m.p. 173-175 °C; Eluent: PE/EA = 30/1.  $^1\text{H}$  NMR (400 MHz,  $\text{CDCl}_3$ , TMS)  $\delta$  7.87 (d,  $J = 8.0$  Hz, 1H), 7.41 (dt,  $J_1 = 8.0$  Hz,  $J_2 = 1.2$  Hz, 1H), 7.33 (d,  $J = 8.4$  Hz, 2H), 7.25 (dt,  $J_1 = 7.6$  Hz,  $J_2 = 1.2$  Hz, 1H), 7.14 (d,  $J = 8.4$  Hz, 2H), 7.05 (d,  $J = 7.6$  Hz, 1H), 6.96 (d,  $J = 8.4$  Hz, 2H), 6.69 (d,  $J = 8.0$  Hz, 2H), 5.29 (s, 1H), 5.17 (s, 1H), 4.79 (s, 1H), 2.16 (s, 3H), 1.15 – 1.04 (m, 1H), 0.94 – 0.82 (m, 1H), 0.82 – 0.71 (m, 2H);  $^{13}\text{C}\{^1\text{H}\}$ -NMR (100 MHz,  $\text{CDCl}_3$ , TMS)  $\delta$  153.6, 143.9, 143.5, 135.5, 133.5, 129.0, 128.8, 128.2 (q,  $J = 32.2$  Hz), 127.5, 126.9, 126.8, 125.4, 124.7 (q,  $J = 3.1$  Hz), 124.3 (q,  $J = 270.1$  Hz), 120.1, 105.8, 73.2, 57.9, 39.8, 21.0, 18.4, 14.7;  $^{19}\text{F}$  NMR (376 MHz,  $\text{CDCl}_3$ )  $\delta$  -62.3; IR (neat):  $\nu$  3068, 2989, 2921, 1670, 1615, 1453, 1354, 1324, 1115, 1068, 877, 739, 658  $\text{cm}^{-1}$ ; HRMS (ESI-TOF) Calcd for  $\text{C}_{20}\text{H}_{19}\text{NO}_2\text{Na}$   $[\text{M}+\text{Na}]^+$ : 504.12156, found: 504.12154.

7.883  
7.863  
7.433  
7.430  
7.413  
7.410  
7.394  
7.390  
7.343  
7.322  
7.273  
7.271  
7.254  
7.252  
7.236  
7.233  
7.150  
7.129  
7.058  
7.039  
6.967  
6.946  
6.702  
6.682  
5.293  
5.169  
4.790

2.159  
1.120  
1.098  
1.086  
1.077  
1.066  
0.897  
0.873  
0.854  
0.842  
0.796  
0.775  
0.756  
0.752  
-0.000

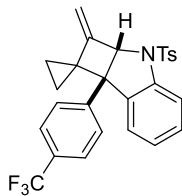

(<sup>1</sup>H NMR, 400 MHz, CDCl<sub>3</sub>)

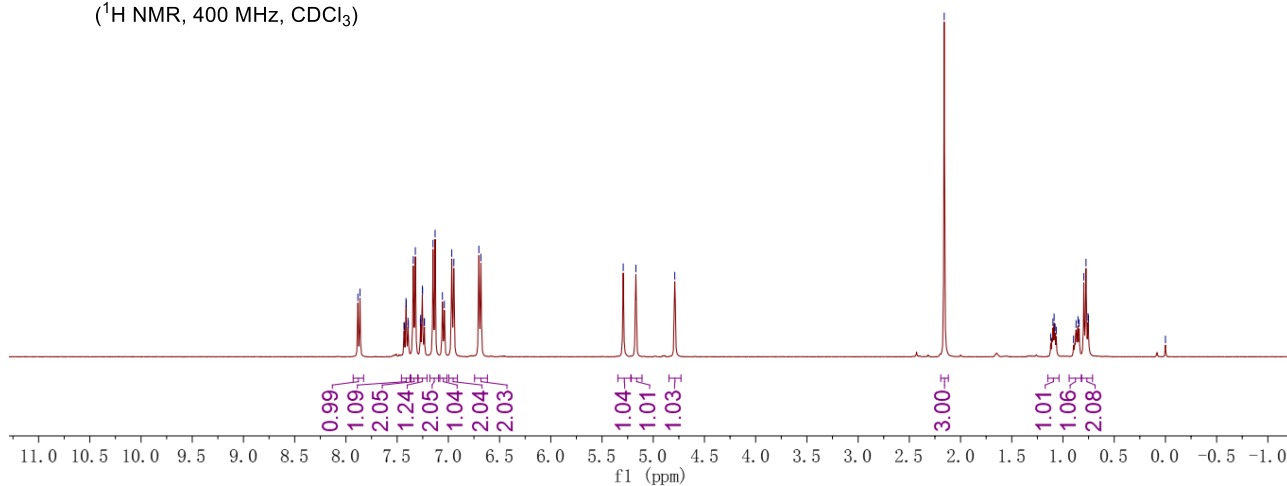

153.600  
143.861  
143.494  
135.481  
133.523  
128.958  
128.815  
128.319  
127.997  
127.488  
126.892  
126.754  
125.760  
125.380  
124.655  
124.624  
122.679  
120.096  
105.755

77.318  
77.000  
76.683  
73.203  
57.884  
39.832  
21.027  
18.447  
14.728

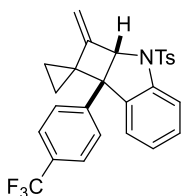

(<sup>13</sup>C NMR, 100 MHz, CDCl<sub>3</sub>)

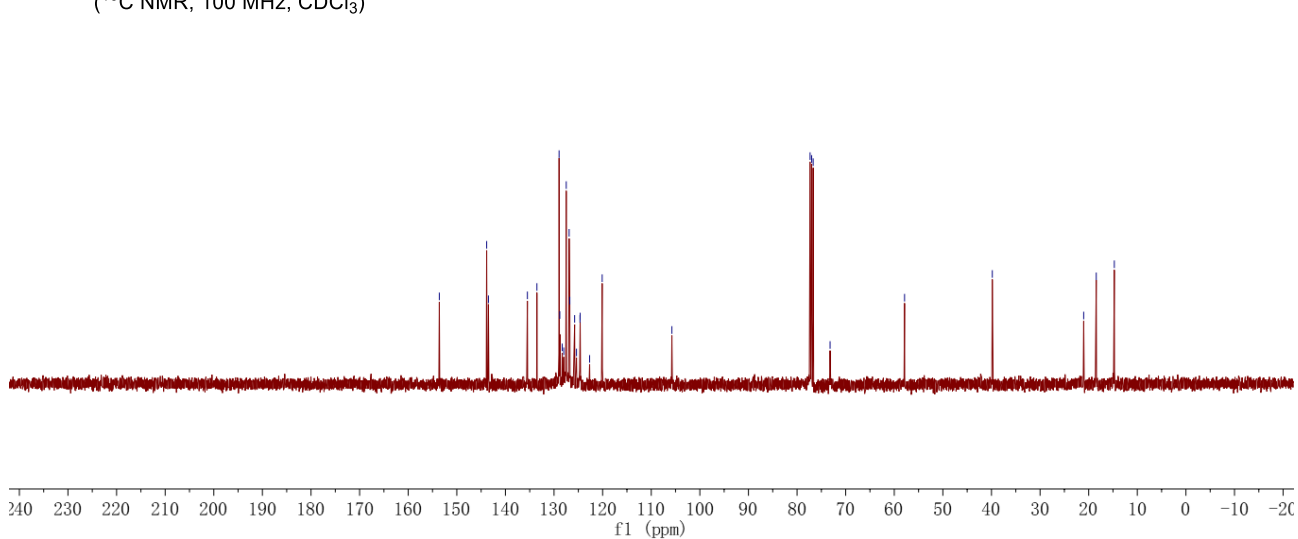

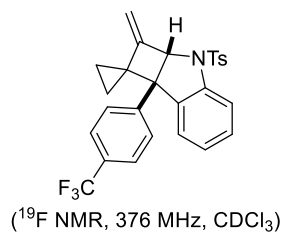

--62.341

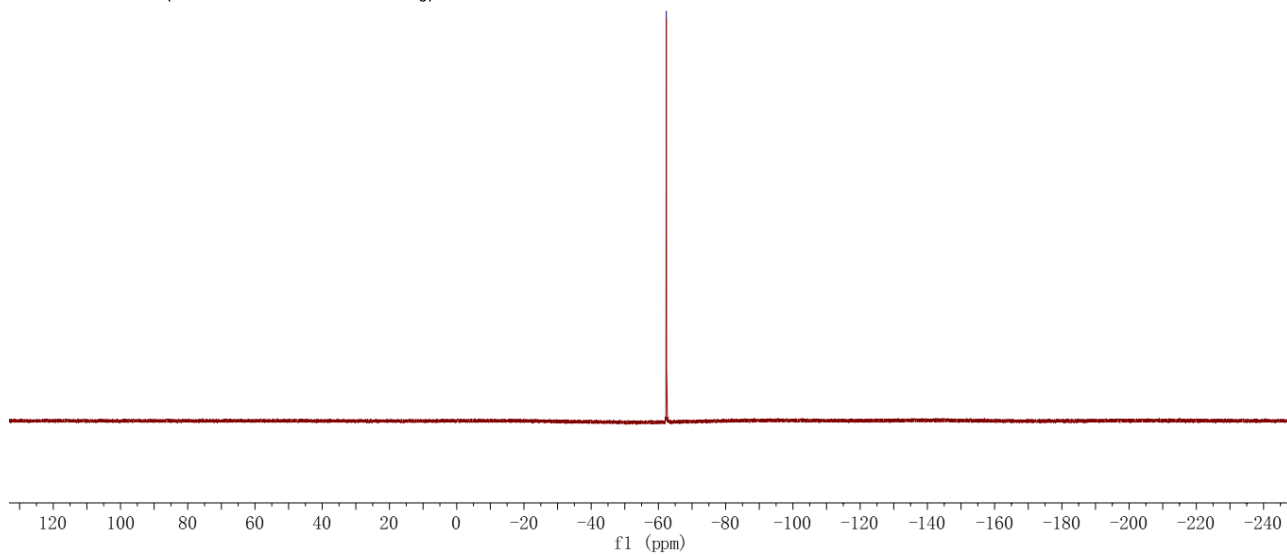

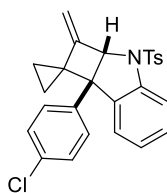

**7b-(4-chlorophenyl)-2-methylene-3-tosyl-2,2a,3,7b-tetrahydrospiro[cyclobuta[b]indole-1,1'-cyclopropane] (2g):** Yield: 58 mg, 65%, white solid, m.p. 177-179 °C; Eluent: PE/EA = 30/1.  $^1\text{H}$  NMR (400 MHz,  $\text{CDCl}_3$ , TMS)  $\delta$  7.84 (d,  $J = 8.0$  Hz, 1H), 7.38 (t,  $J = 7.8$  Hz, 1H), 7.27 – 7.20 (m, 1H), 7.17 (d,  $J = 8.0$  Hz, 2H), 7.08 – 6.98 (m, 3H), 6.83 – 6.69 (m, 4H), 5.26 (s, 1H), 5.12 (s, 1H), 4.76 (s, 1H), 2.22 (s, 3H), 1.09 – 1.00 (m, 1H), 0.91 – 0.82 (m, 1H), 0.79 – 0.71 (m, 2H);  $^{13}\text{C}\{^1\text{H}\}$ -NMR (100 MHz,  $\text{CDCl}_3$ , TMS)  $\delta$  153.8, 144.0, 143.4, 138.4, 135.8, 133.6, 131.8, 129.0, 128.6, 128.6, 127.8, 126.8, 126.7, 125.5, 119.9, 105.5, 73.2, 57.6, 39.6, 21.3, 18.3, 14.5; IR (neat):  $\nu$  3068, 3026, 2953, 1597, 1492, 1450, 1354, 1169, 1088, 1051, 1011, 929, 824, 757, 676  $\text{cm}^{-1}$ ; HRMS (ESI-TOF) Calcd for  $\text{C}_{20}\text{H}_{19}\text{NO}_2\text{Na}$   $[\text{M}+\text{Na}]^+$ : 470.09520, found: 470.09659.

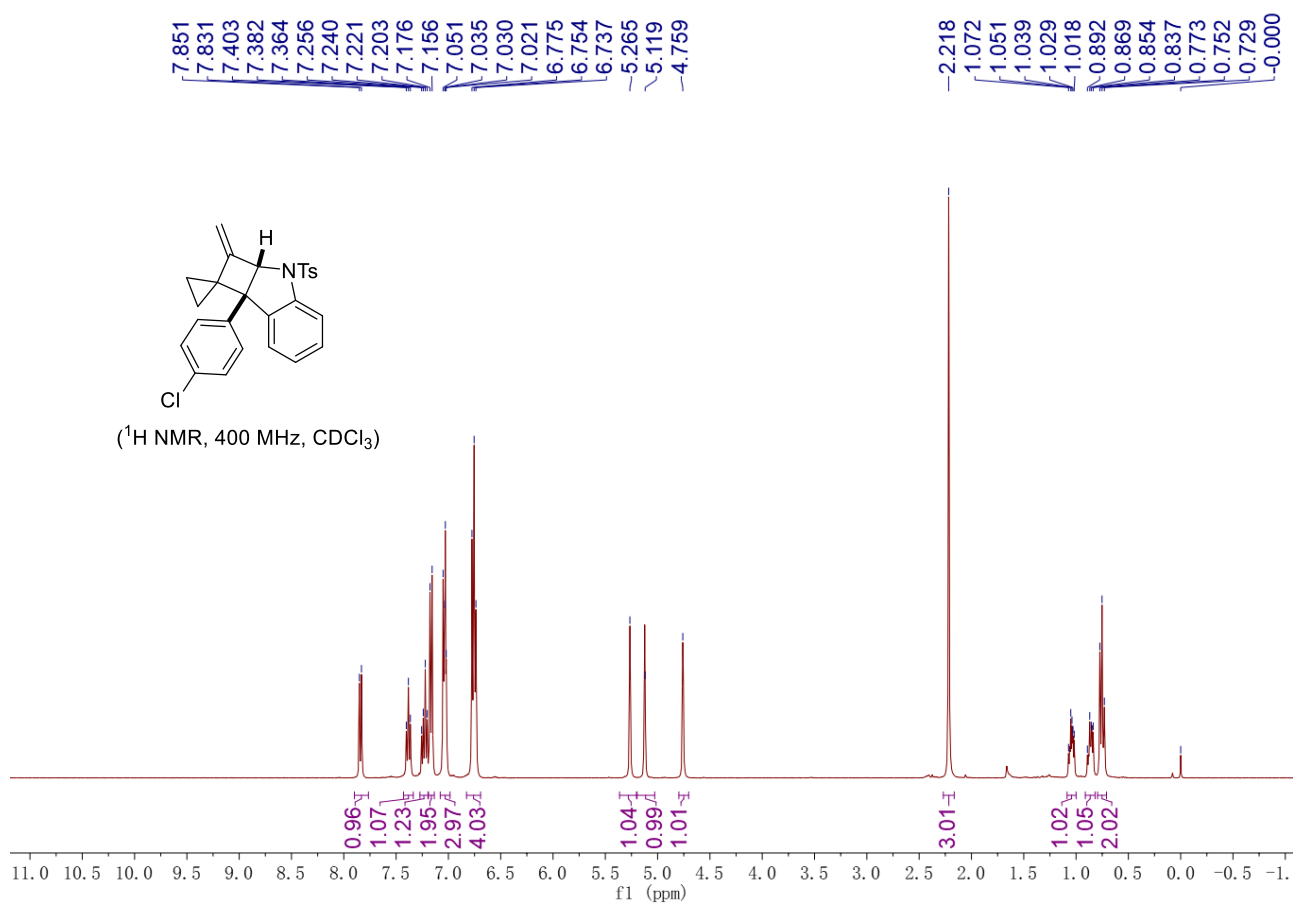

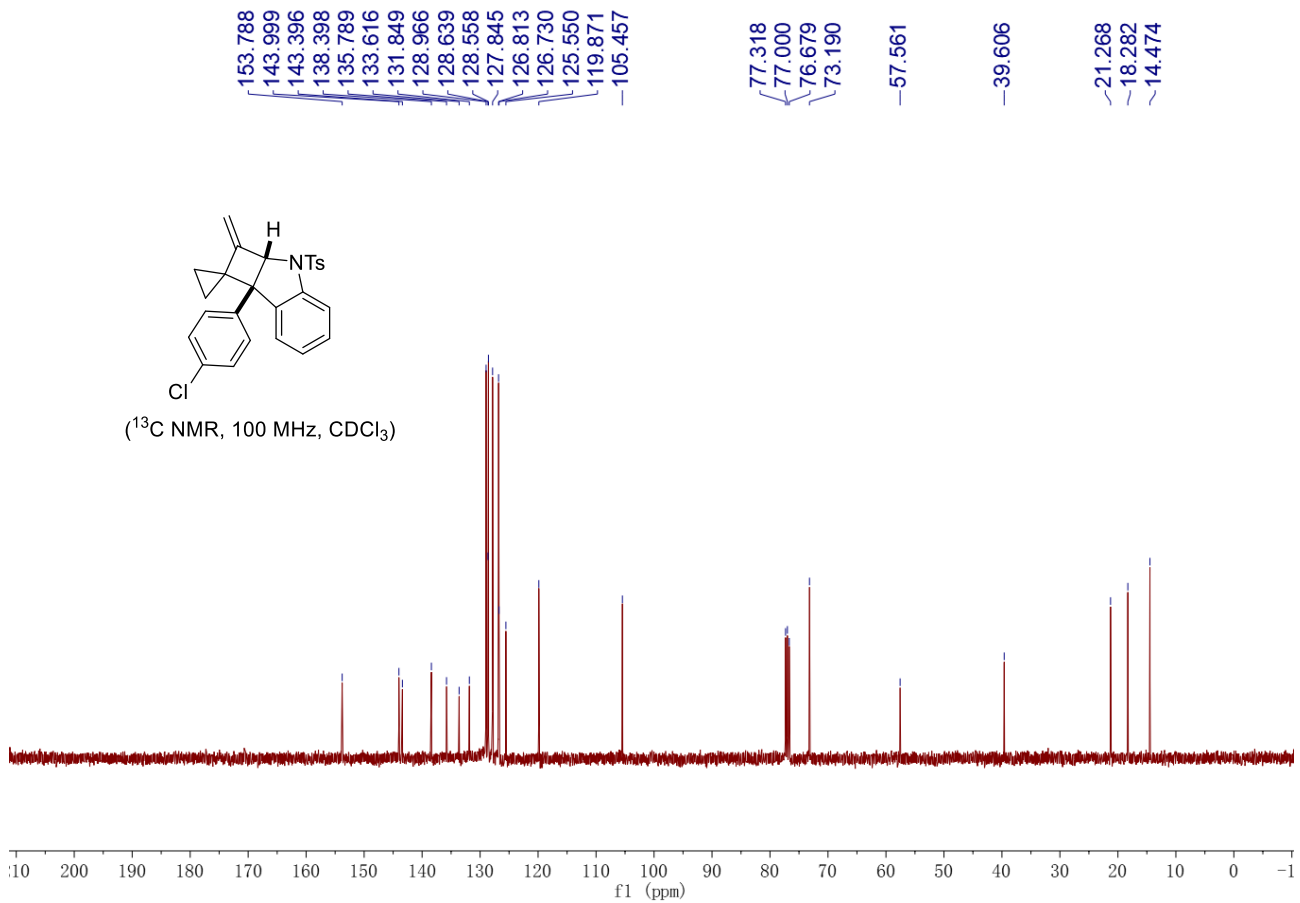

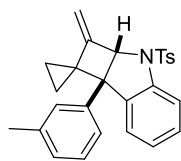

**2-methylene-7b-(m-tolyl)-3-tosyl-2,2a,3,7b-tetrahydrospiro[cyclobuta[b]indole-1,1'-cyclopropane] (2h):** Yield: 56 mg, 65%, white solid, m.p. 193-195 °C; Eluent: PE/EA = 30/1.  $^1\text{H}$  NMR (400 MHz,  $\text{CDCl}_3$ , TMS)  $\delta$  7.81 (d,  $J = 8.0$  Hz, 1H), 7.34 (t,  $J = 8.0$  Hz, 1H), 7.25 (d,  $J = 8.0$  Hz, 2H), 7.18 (t,  $J = 7.6$  Hz, 1H), 7.05 (d,  $J = 7.6$  Hz, 1H), 6.99 (t,  $J = 7.2$  Hz, 1H), 6.91 (d,  $J = 7.2$  Hz, 1H), 6.77 (d,  $J = 8.0$  Hz, 2H), 6.66 (d,  $J = 7.6$  Hz, 1H), 6.61 (s, 1H), 5.26 (s, 1H), 5.21 (s, 1H), 4.75 (s, 1H), 2.19 (s, 3H), 2.18 (s, 3H), 1.06 – 0.91 (m, 2H), 0.80 – 0.70 (m, 2H);  $^{13}\text{C}\{^1\text{H}\}$ -NMR (100 MHz,  $\text{CDCl}_3$ , TMS)  $\delta$  154.5, 143.4, 143.2, 139.8, 137.2, 136.3, 134.1, 129.0, 128.3, 127.7, 127.6, 126.9, 126.8, 126.7, 125.1, 124.2, 119.0, 104.9, 72.7, 57.9, 39.6, 21.4, 21.3, 18.2, 14.6; IR (neat):  $\nu$  3039, 2976, 2913, 1681, 1597, 1456, 1351, 1164, 1087, 1060, 888, 780, 670  $\text{cm}^{-1}$ ; HRMS (ESI-TOF) Calcd for  $\text{C}_{20}\text{H}_{19}\text{NO}_2\text{Na}$   $[\text{M}+\text{Na}]^+$ : 450.14982, found: 450.15012.

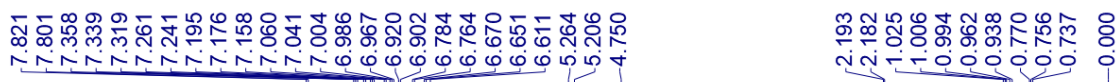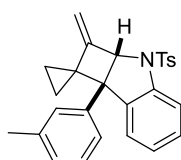

( $^1\text{H}$  NMR, 400 MHz,  $\text{CDCl}_3$ )

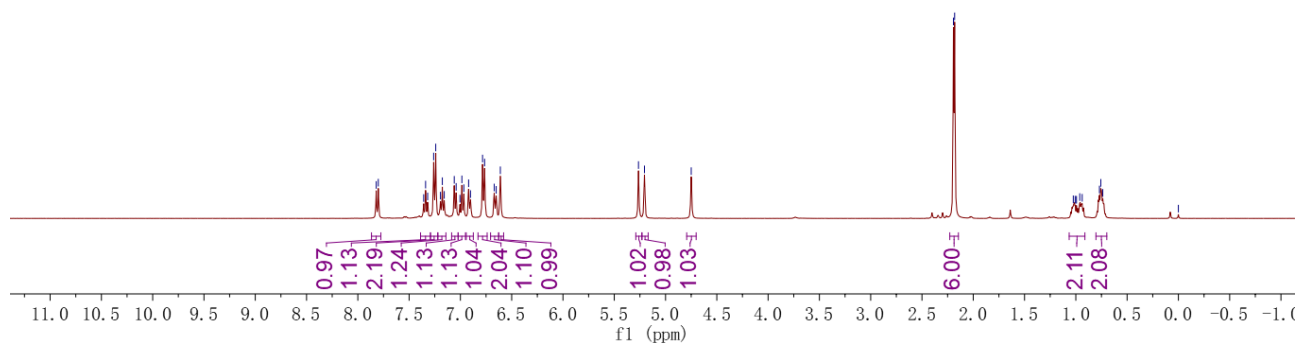

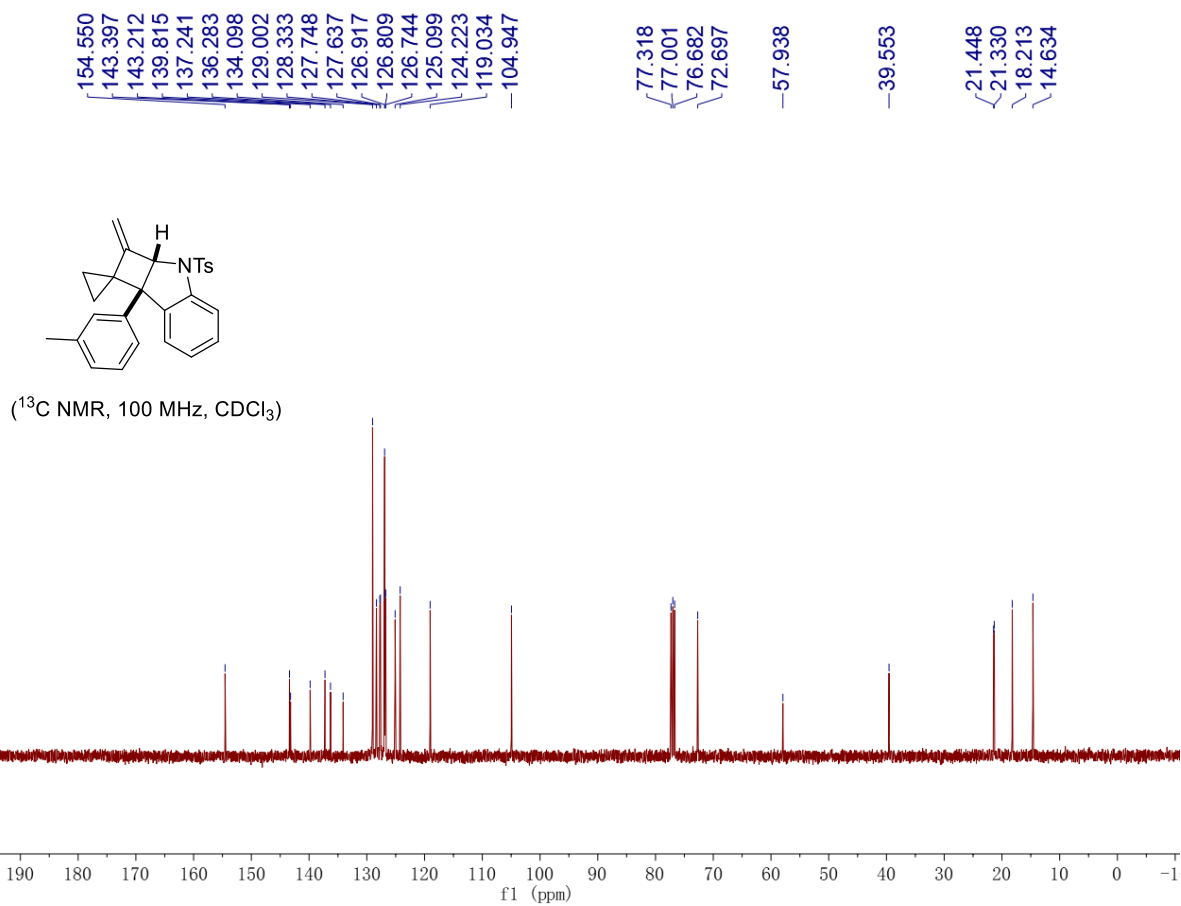

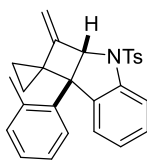

**2-methylene-7b-(o-tolyl)-3-tosyl-2,2a,3,7b-tetrahydrospiro[cyclobuta[*b*]indole-1,1'-cyclopropane] (2i):** Yield: 26 mg, 30%, white solid, m.p. 191-193 °C; Eluent: PE/EA = 30/1. <sup>1</sup>H NMR (400 MHz, CDCl<sub>3</sub>, TMS) δ 7.81 (d, *J* = 8.0 Hz, 1H), 7.34 (t, *J* = 8.0 Hz, 1H), 7.27 – 7.14 (m, 4H), 7.11 – 6.99 (m, 3H), 6.75 (t, *J* = 7.6 Hz, 1H), 6.72 – 6.59 (m, 3H), 5.52 (s, 1H), 5.30 (s, 1H), 4.79 (s, 1H), 2.38 (s, 3H), 2.11 (s, 3H), 1.15 – 1.05 (m, 1H), 1.05 – 0.94 (m, 1H), 0.74 – 0.58 (m, 2H); <sup>13</sup>C{<sup>1</sup>H}-NMR (100 MHz, CDCl<sub>3</sub>, TMS) δ 154.1, 143.6, 142.8, 137.8, 137.0, 135.8, 133.6, 132.1, 129.0, 128.1, 127.5, 126.6, 126.2, 124.9, 124.9, 119.6, 105.9, 70.1, 58.6, 39.6, 21.3, 19.1, 15.5; IR (neat): ν 3057, 2992, 2911, 1683, 1597, 1461, 1350, 1166, 1155, 1090, 1067, 892, 704, 662 cm<sup>-1</sup>; HRMS (ESI-TOF) Calcd for C<sub>20</sub>H<sub>19</sub>NO<sub>2</sub>Na [M+Na]<sup>+</sup>: 450.14982, found: 450.15016.

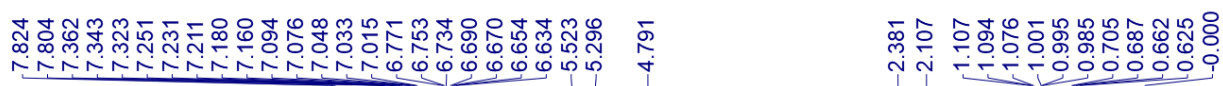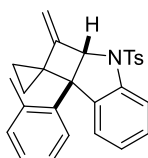

(<sup>1</sup>H NMR, 400 MHz, CDCl<sub>3</sub>)

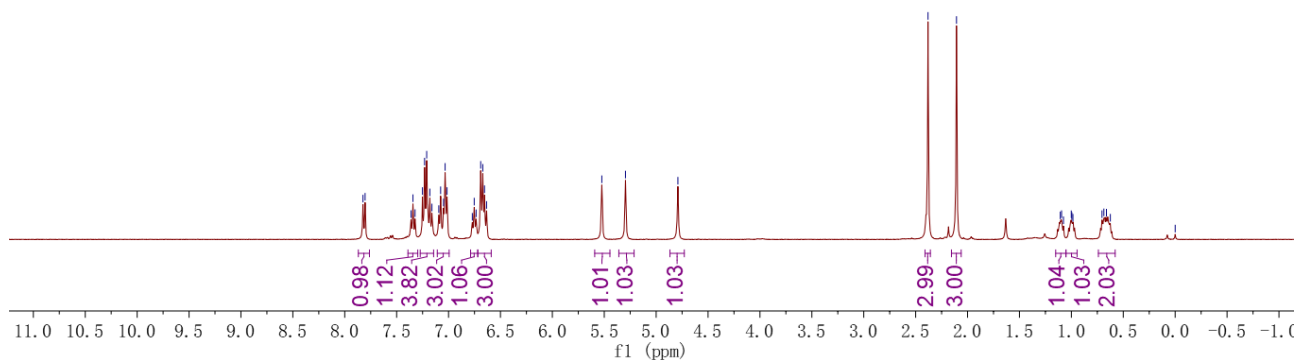



154.142  
 143.604  
 142.756  
 137.790  
 136.977  
 135.815  
 133.611  
 132.130  
 128.966  
 128.053  
 127.477  
 126.616  
 126.246  
 124.897  
 124.855  
 119.567  
 -105.856  
  
 77.317  
 77.001  
 76.682  
 70.073  
 -58.590  
 -39.649  
 ~21.309  
 ~19.060  
 ~15.467

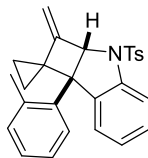

(<sup>13</sup>C NMR, 100 MHz, CDCl<sub>3</sub>)

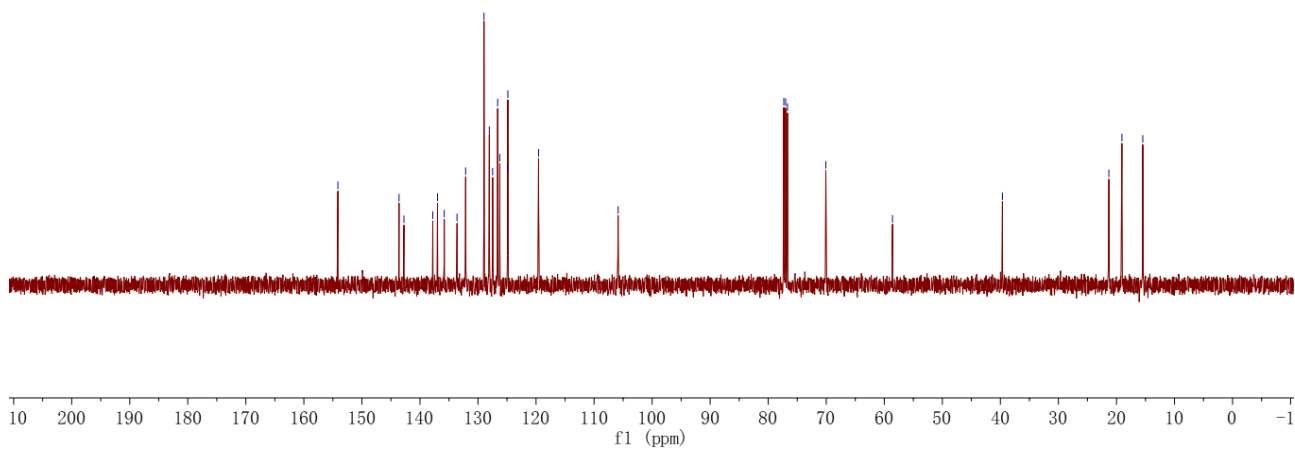

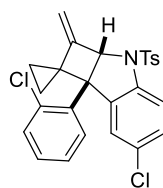

**6-chloro-7b-(2-chlorophenyl)-2-methylene-3-tosyl-2,2a,3,7b-tetrahydrospiro[cyclobuta[b]indole-1,1'-cyclopropane] (2j):** Yield: 36 mg, 38%, white solid, m.p. 173-175 °C; Eluent: PE/EA = 30/1.

$^1\text{H}$  NMR (400 MHz,  $\text{CDCl}_3$ , TMS)  $\delta$  7.78 (d,  $J = 8.8$  Hz, 1H), 7.34 (t,  $J = 8.8$  Hz, 2H), 7.27 (d,  $J = 1.2$  Hz, 1H), 7.22 (d,  $J = 7.2$  Hz, 2H), 7.14 – 7.03 (m, 2H), 6.84 (t,  $J = 7.6$  Hz, 1H), 6.68 (d,  $J = 7.6$  Hz, 2H), 6.55 (d,  $J = 8.0$  Hz, 1H), 6.07 (s, 1H), 5.27 (s, 1H), 4.77 (s, 1H), 2.09 (s, 3H), 1.23 – 1.09 (m, 1H), 1.02 – 0.91 (m, 1H), 0.80 – 0.58 (m, 2H);  $^{13}\text{C}\{^1\text{H}\}$ -NMR (100 MHz,  $\text{CDCl}_3$ , TMS)  $\delta$  154.1, 143.6, 142.8, 137.8, 137.0, 135.8, 133.6, 132.1, 129.0, 128.1, 127.5, 126.6, 126.2, 124.9, 124.9, 119.6, 105.9, 70.1, 58.6, 39.6, 21.3, 19.1, 15.5; IR (neat):  $\nu$  3068, 3044, 2984, 1678, 1594, 1463, 1353, 1065, 1039, 888, 766, 660  $\text{cm}^{-1}$ ; HRMS (ESI-TOF) Calcd for  $\text{C}_{20}\text{H}_{19}\text{NO}_2\text{Na}$   $[\text{M}+\text{Na}]^+$ : 504.05623, found: 504.05680.

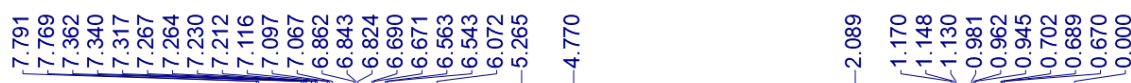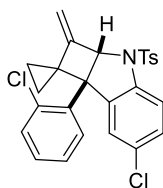

( $^1\text{H}$  NMR, 400 MHz,  $\text{CDCl}_3$ )

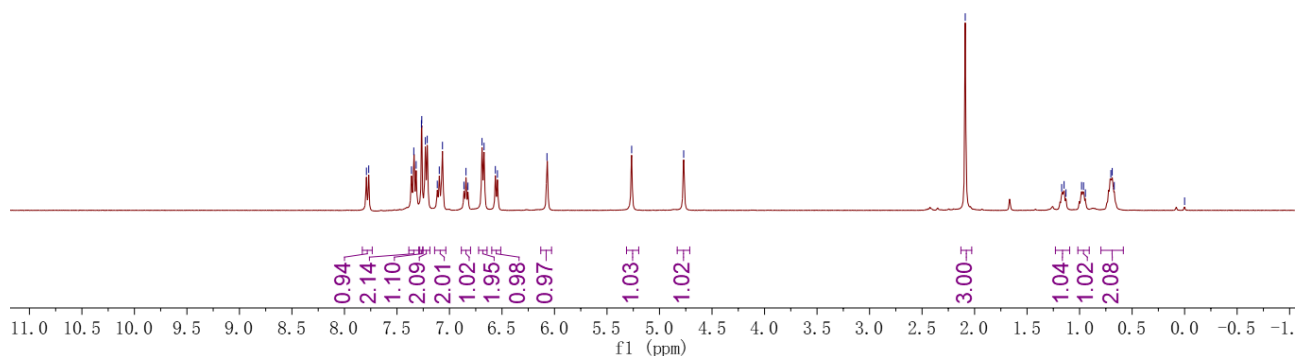

153.648  
 143.747  
 141.727  
 138.863  
 134.115  
 133.098  
 131.441  
 130.505  
 129.316  
 129.037  
 128.687  
 127.718  
 127.385  
 126.706  
 126.015  
 121.412  
 105.467  
 77.319  
 77.000  
 76.682  
 69.356  
 58.406  
 39.215  
 21.295  
 20.409  
 14.784

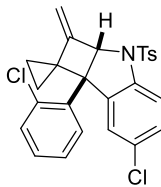

( $^{13}\text{C}$  NMR, 100 MHz,  $\text{CDCl}_3$ )

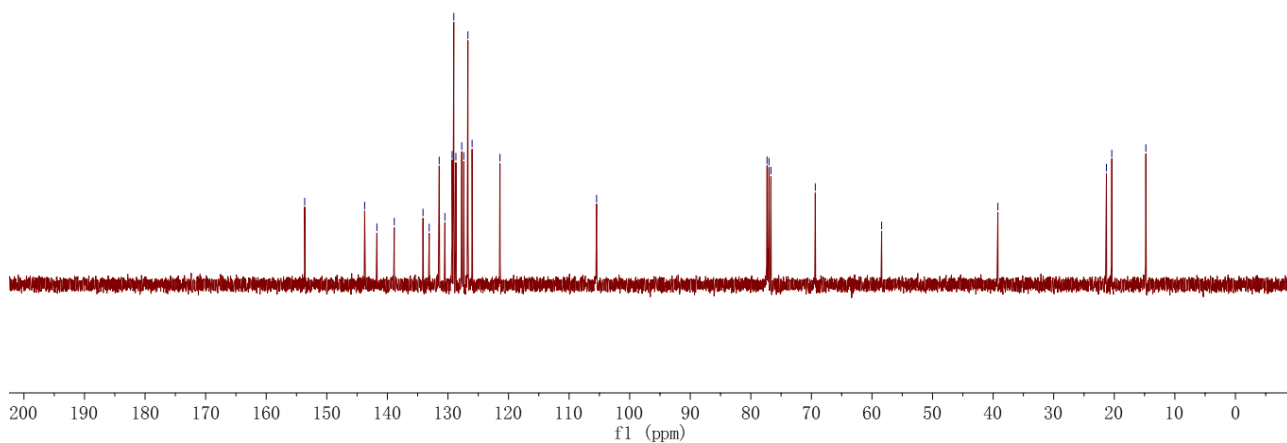

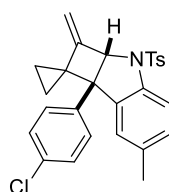

**7b-(4-chlorophenyl)-6-methyl-2-methylene-3-tosyl-2,2a,3,7b-tetrahydrospiro[cyclobuta[*b*]indole-1,1'-cyclopropane] (2k):** Yield: 56 mg, 61%, white solid, m.p. >200 °C; Eluent: PE/EA = 30/1. <sup>1</sup>H NMR (400 MHz, CDCl<sub>3</sub>, TMS) δ 7.72 (d, *J* = 8.4 Hz, 1H), 7.27 – 7.11 (m, 3H), 7.03 (d, *J* = 8.0 Hz, 2H), 6.83 (s, 1H), 6.79 – 6.69 (m, 4H), 5.25 (s, 1H), 5.11 (s, 1H), 4.75 (s, 1H), 2.37 (s, 3H), 2.22 (s, 3H), 1.09 – 0.95 (m, 1H), 0.93 – 0.66 (m, 3H); <sup>13</sup>C{<sup>1</sup>H}-NMR (100 MHz, CDCl<sub>3</sub>, TMS) δ 153.9, 143.9, 141.0, 138.4, 135.9, 135.4, 133.5, 131.7, 129.5, 128.9, 128.6, 127.8, 127.1, 126.8, 119.7, 105.3, 73.4, 57.6, 39.5, 21.3, 21.3, 18.3, 14.3; IR (neat): ν 3071, 2990, 2917, 1675, 1597, 1479, 1352, 1161, 1078, 875, 675 cm<sup>-1</sup>; HRMS (ESI-TOF) Calcd for C<sub>20</sub>H<sub>19</sub>NO<sub>2</sub>Na [M+Na]<sup>+</sup>: 484.11085, found: 484.11090.

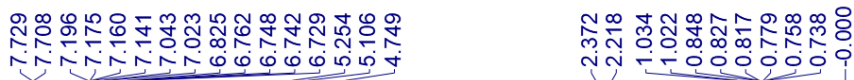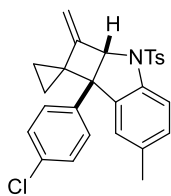

(<sup>1</sup>H NMR, 400 MHz, CDCl<sub>3</sub>)

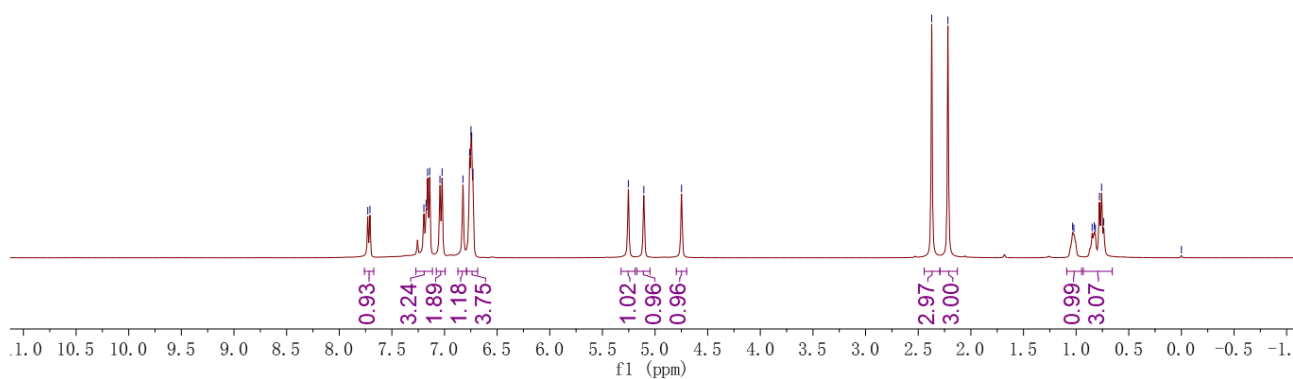

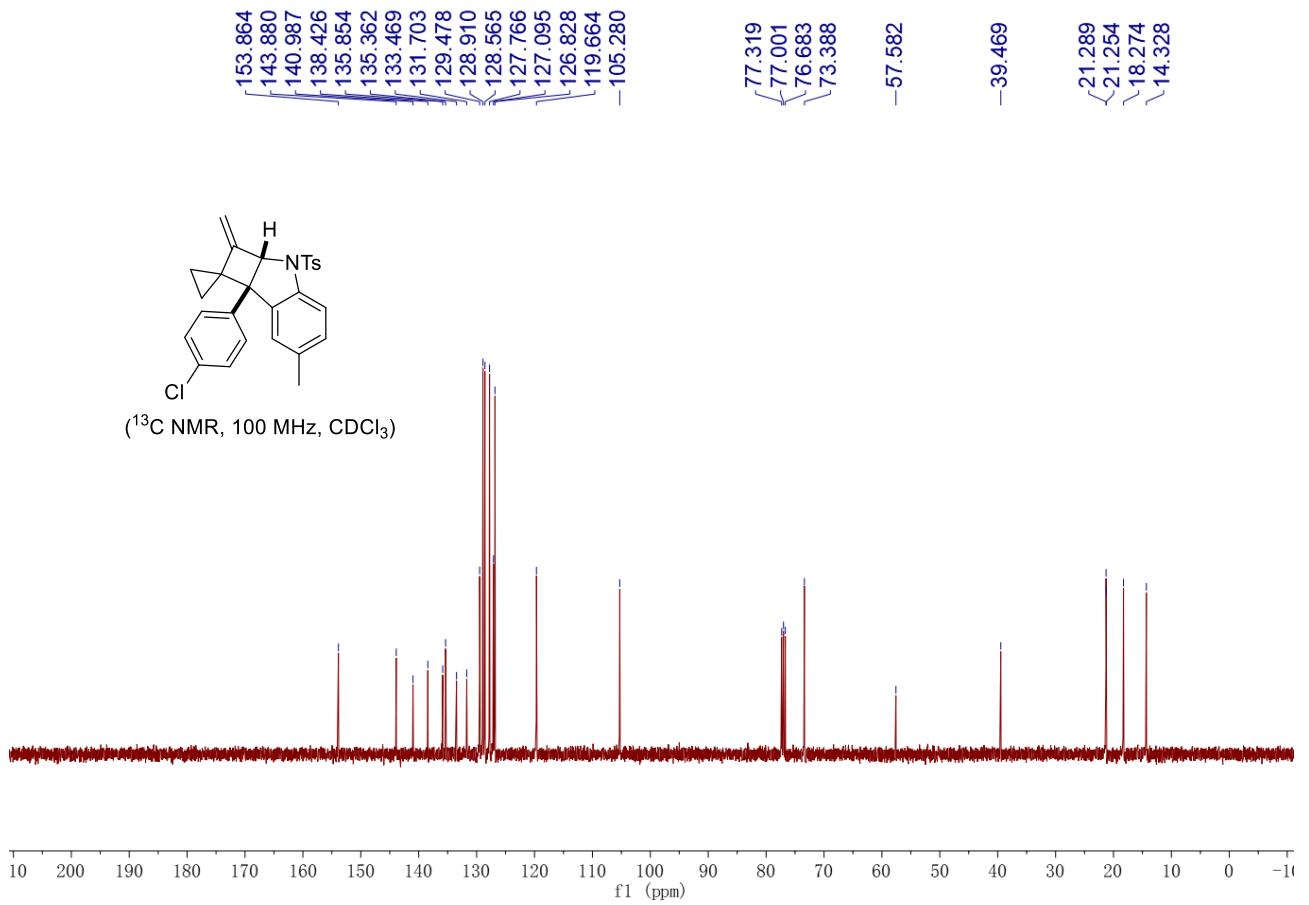

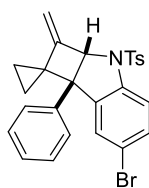

**6-bromo-2-methylene-7b-phenyl-3-tosyl-2,2a,3,7b-tetrahydrospiro[cyclobuta[*b*]indole-1,1'-cyclopropane] (2l):** Yield: 66 mg, 67%, white solid, m.p. 189-191 °C; Eluent: PE/EA = 30/1. <sup>1</sup>H NMR (400 MHz, CDCl<sub>3</sub>, TMS) δ 7.62 (d, *J* = 8.4 Hz, 1H), 7.38 (dd, *J*<sub>1</sub> = 8.8 Hz, *J*<sub>2</sub> = 2.0 Hz, 1H), 7.19 – 7.10 (m, 2H), 7.08 (s, 1H), 7.05 – 6.97 (m, 3H), 6.78 – 6.61 (m, 4H), 5.18 (s, 1H), 5.10 (s, 1H), 4.69 (s, 1H), 2.11 (s, 3H), 1.02 – 0.88 (m, 1H), 0.88 – 0.77 (m, 1H), 0.77 – 0.57 (m, 2H); <sup>13</sup>C{<sup>1</sup>H}-NMR (100 MHz, CDCl<sub>3</sub>, TMS) δ 153.8, 143.8, 142.5, 139.0, 138.5, 133.5, 131.4, 129.6, 129.2, 127.9, 126.8, 126.8, 126.1, 120.6, 118.0, 105.4, 73.1, 58.1, 39.6, 21.3, 18.3, 14.7; IR (neat): ν 3063, 2979, 2908, 1686, 1600, 1471, 1355, 1170, 1087, 1059, 1013, 870, 702, 655 cm<sup>-1</sup>; HRMS (ESI-TOF) Calcd for C<sub>20</sub>H<sub>19</sub>NO<sub>2</sub>Na [M+Na]<sup>+</sup>: 514.04468, found: 514.04566.

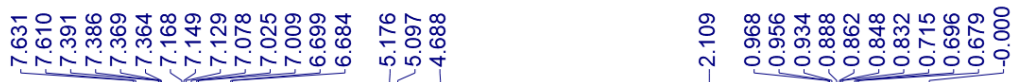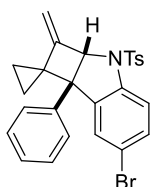

(<sup>1</sup>H NMR, 400 MHz, CDCl<sub>3</sub>)

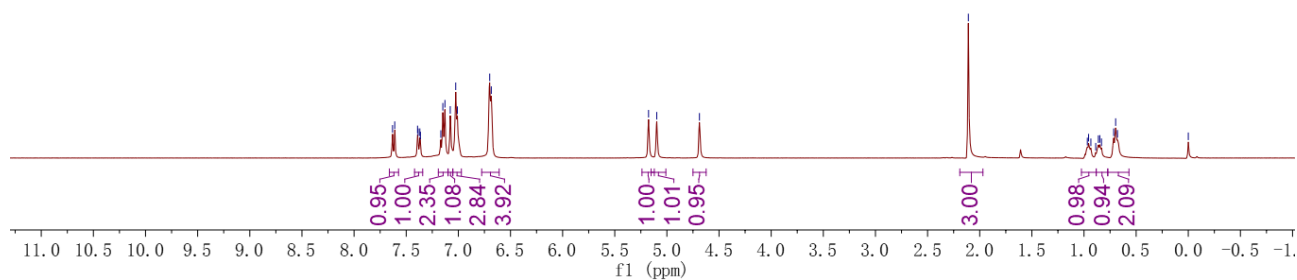

153.756  
143.811  
142.482  
139.007  
138.516  
133.509  
131.417  
129.586  
129.207  
127.935  
126.785  
126.754  
126.143  
120.619  
118.007  
-105.373

77.318  
77.000  
76.682  
73.105

-58.086

-39.641

~21.316  
~18.309  
~14.724

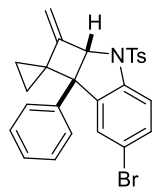

(<sup>13</sup>C NMR, 100 MHz, CDCl<sub>3</sub>)

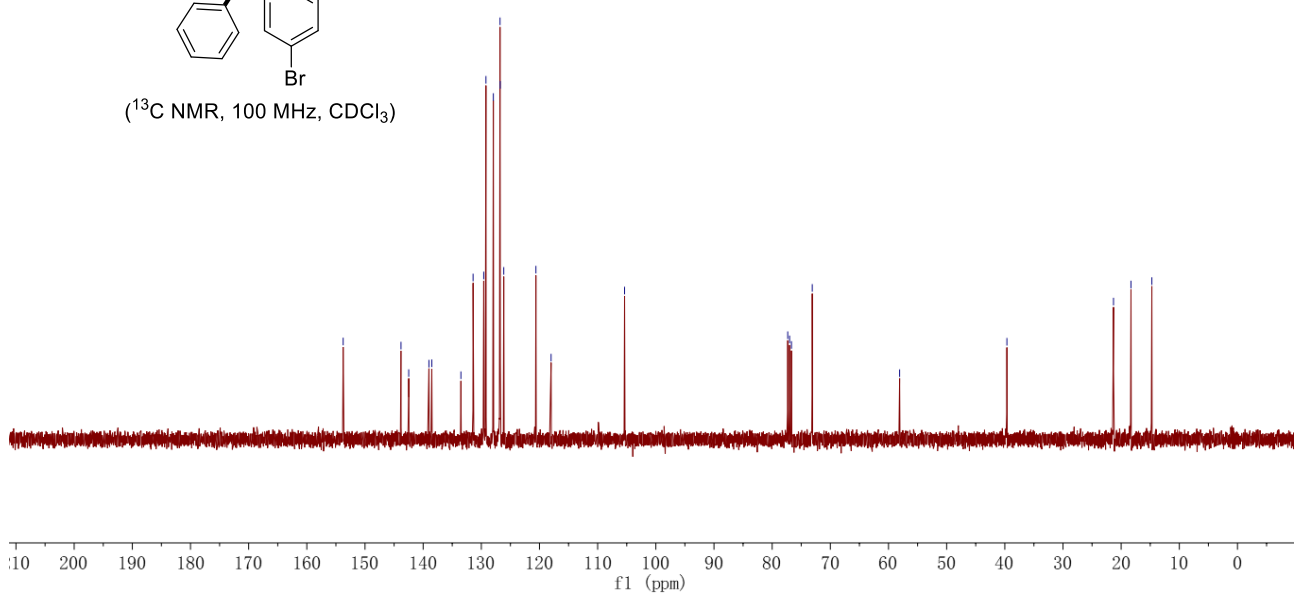

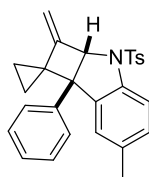

**6-methyl-2-methylene-7b-phenyl-3-tosyl-2,2a,3,7b-tetrahydrospiro[cyclobuta[b]indole-1,1'-cyclopropane] (2m):** Yield: 56 mg, 65%, white solid, m.p. >200 °C; Eluent: PE/EA = 30/1. <sup>1</sup>H NMR (400 MHz, CDCl<sub>3</sub>, TMS) δ 7.70 (d, *J* = 8.4 Hz, 1H), 7.26 – 7.13 (m, 3H), 7.12 – 7.02 (m, 3H), 6.89 – 6.76 (m, 3H), 6.72 (d, *J* = 7.6 Hz, 2H), 5.26 (s, 1H), 5.17 (s, 1H), 4.74 (s, 1H), 2.35 (s, 3H), 2.17 (s, 3H), 1.06 – 0.96 (m, 1H), 0.96 – 0.86 (m, 1H), 0.81 – 0.70 (m, 2H); <sup>13</sup>C{<sup>1</sup>H}-NMR (100 MHz, CDCl<sub>3</sub>, TMS) δ 154.5, 143.4, 140.9, 139.8, 136.3, 135.0, 133.7, 129.2, 129.0, 127.7, 127.2, 127.1, 126.9, 125.8, 119.1, 109.9, 104.9, 73.1, 58.1, 39.5, 21.3, 21.3, 18.3, 14.6; IR (neat): ν 3065, 2976, 2911, 1670, 1592, 1479, 1352, 1170, 1157, 1097, 1059, 932, 873, 763, 669 cm<sup>-1</sup>; HRMS (ESI-TOF) Calcd for C<sub>20</sub>H<sub>19</sub>NO<sub>2</sub>Na [M+Na]<sup>+</sup>: 450.14982, found: 450.15051.

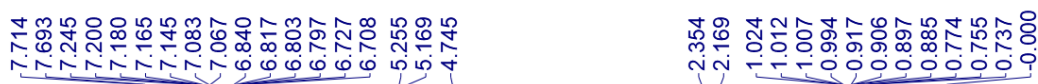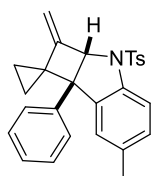

(<sup>1</sup>H NMR, 400 MHz, CDCl<sub>3</sub>)

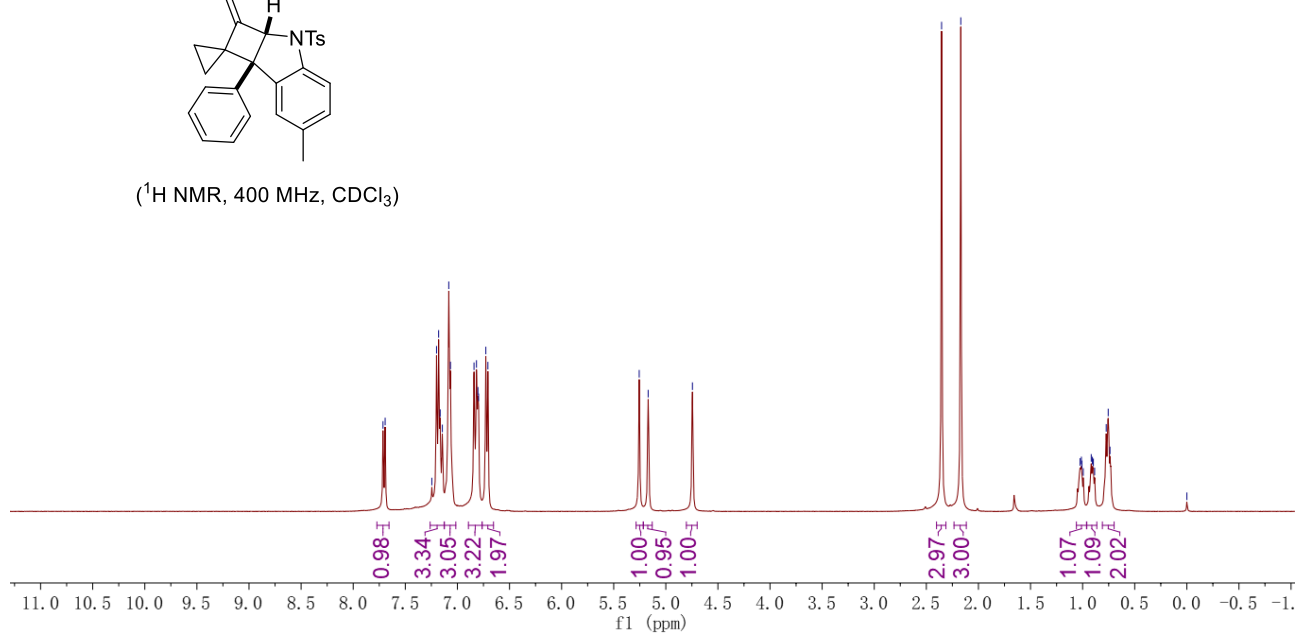



154.526  
143.389  
140.929  
139.822  
136.279  
134.979  
133.692  
129.217  
129.023  
127.735  
127.215  
127.077  
126.857  
125.801  
119.133  
-109.924  
-104.917

77.314  
76.997  
76.677  
73.123

-58.054

-39.545

21.313  
21.275  
18.292  
14.565

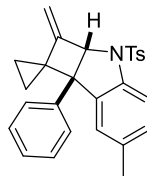

(<sup>13</sup>C NMR, 100 MHz, CDCl<sub>3</sub>)

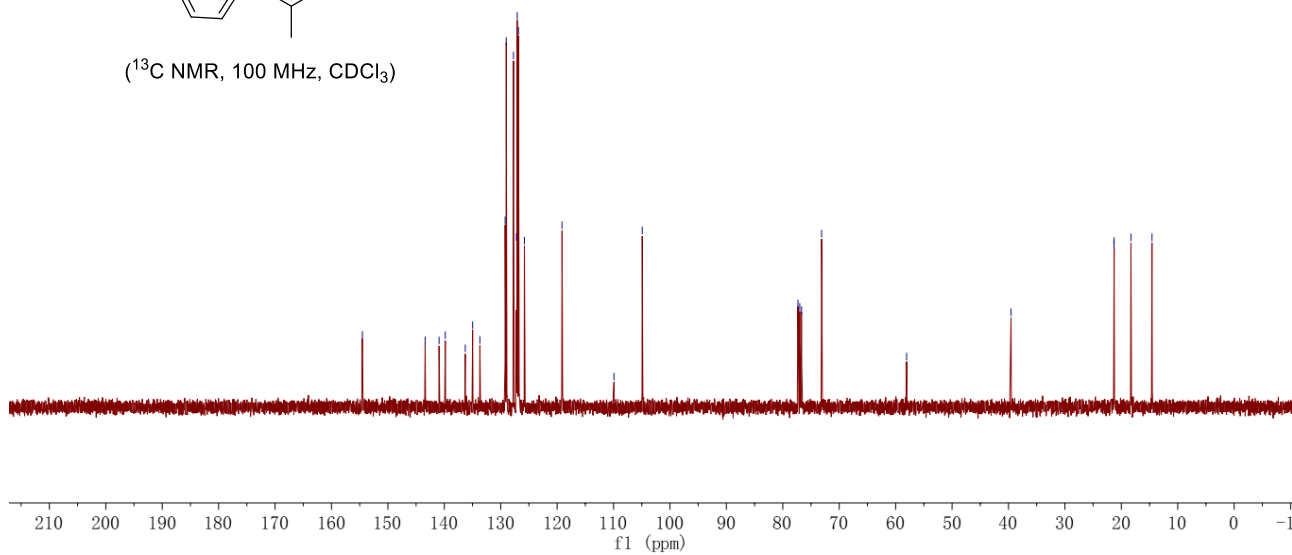

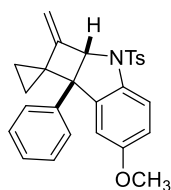

**6-methoxy-2-methylene-7b-phenyl-3-tosyl-2,2a,3,7b-tetrahydrospiro[cyclobuta[b]indole-1,1'-cyclopropane] (2n):** Yield: 51 mg, 58%, white solid, m.p. 189-191 °C; Eluent: PE/EA = 30/1.  $^1\text{H}$  NMR (400 MHz,  $\text{CDCl}_3$ , TMS)  $\delta$  7.76 (d,  $J = 8.8$  Hz, 1H), 7.14 (d,  $J = 7.6$  Hz, 2H), 7.11 – 7.01 (m, 3H), 6.92 (dd,  $J_1 = 8.8$  Hz,  $J_2 = 2.8$  Hz, 1H), 6.81 (d,  $J = 6.4$  Hz, 2H), 6.69 (d,  $J = 8.0$  Hz, 2H), 6.57 (d,  $J = 2.7$  Hz, 1H), 5.27 (s, 1H), 5.17 (s, 1H), 4.76 (s, 1H), 3.81 (s, 3H), 2.17 (s, 3H), 1.09 – 0.99 (m, 1H), 0.94 – 0.84 (m, 1H), 0.81 – 0.71 (m, 2H);  $^{13}\text{C}\{^1\text{H}\}$ -NMR (100 MHz,  $\text{CDCl}_3$ , TMS)  $\delta$  157.6, 154.4, 143.4, 139.5, 137.9, 136.7, 133.3, 129.0, 127.8, 127.1, 127.0, 125.8, 120.6, 113.5, 112.5, 105.1, 73.6, 58.4, 55.6, 39.7, 21.4, 18.5, 14.6; IR (neat):  $\nu$  3071, 3019, 2969, 1672, 1604, 1484, 1348, 1025, 852, 700, 678  $\text{cm}^{-1}$ ; HRMS (ESI-TOF) Calcd for  $\text{C}_{20}\text{H}_{19}\text{NO}_2\text{Na}$   $[\text{M}+\text{Na}]^+$ : 466.14474, found: 466.14458.

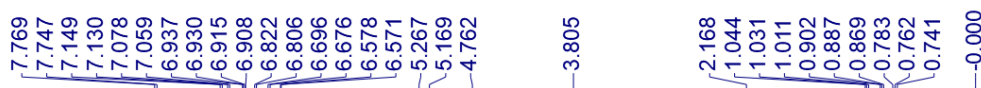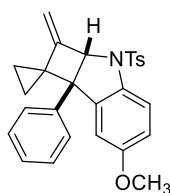

( $^1\text{H}$  NMR, 400 MHz,  $\text{CDCl}_3$ )

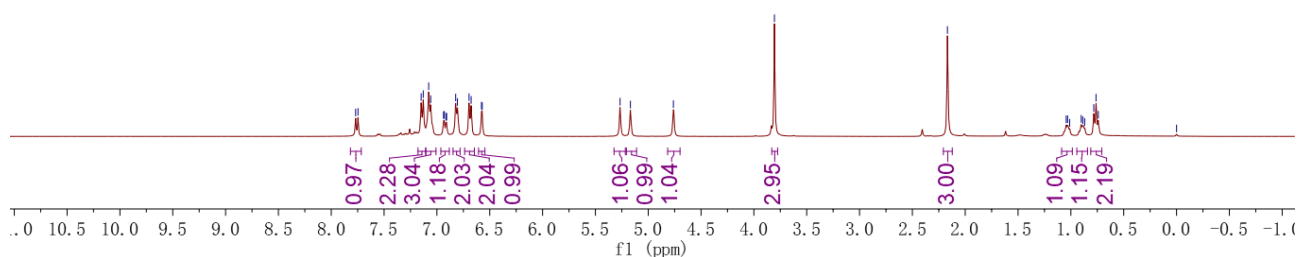

~157.612  
 ~154.425  
 143.405  
 139.490  
 137.948  
 136.684  
 133.335  
 ~129.019  
 ~127.766  
 127.130  
 126.972  
 125.808  
 120.644  
 113.521  
 112.486  
 105.082  
  
 77.318  
 77.000  
 76.682  
 73.648  
  
 ~58.368  
 ~55.610  
  
 ~39.722  
  
 ~21.351  
 ~18.473  
 ~14.644

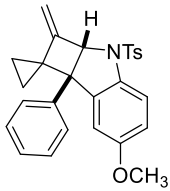

(<sup>13</sup>C NMR, 100 MHz, CDCl<sub>3</sub>)

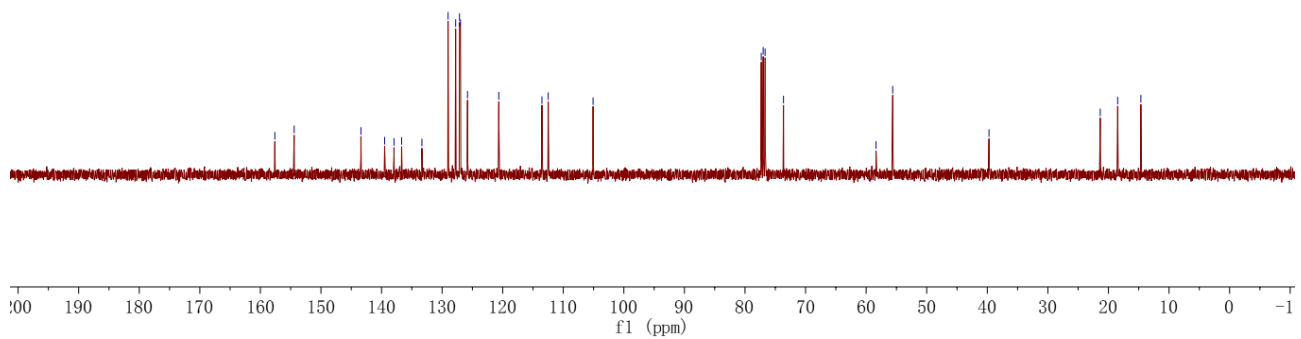

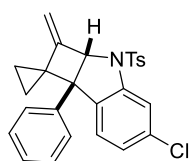

**5-chloro-2-methylene-7b-phenyl-3-tosyl-2,2a,3,7b-tetrahydrospiro[cyclobuta[*b*]indole-1,1'-cyclopropane] (2o):** Yield: 61 mg, 68%, white solid, m.p. 173-175 °C; Eluent: PE/EA = 30/1. <sup>1</sup>H NMR (400 MHz, CDCl<sub>3</sub>, TMS) δ 7.85 (d, *J* = 8.0 Hz, 1H), 7.39 (t, *J* = 8.0 Hz, 1H), 7.27 – 7.14 (m, 3H), 7.08 – 6.99 (m, 3H), 6.80 – 6.72 (m, 4H), 5.27 (s, 1H), 5.12 (s, 1H), 4.77 (s, 1H), 2.22 (s, 3H), 1.07 – 0.99 (m, 3H), 0.91 – 0.80 (m, 1H), 0.80 – 0.70 (m, 2H); <sup>13</sup>C{<sup>1</sup>H}-NMR (100 MHz, CDCl<sub>3</sub>, TMS) δ 153.8, 144.0, 143.4, 138.4, 135.8, 133.7, 131.9, 129.0, 128.7, 128.6, 127.9, 126.9, 126.7, 125.6, 119.9, 105.5, 73.2, 57.6, 39.6, 21.3, 18.3, 14.5; IR (neat): ν 3060, 2987, 2925, 1591, 1490, 1353, 1170, 1089, 1011, 886, 757, 676 cm<sup>-1</sup>; HRMS (ESI-TOF) Calcd for C<sub>20</sub>H<sub>19</sub>NO<sub>2</sub>Na [M+Na]<sup>+</sup>: 470.09520, found: 470.09616.

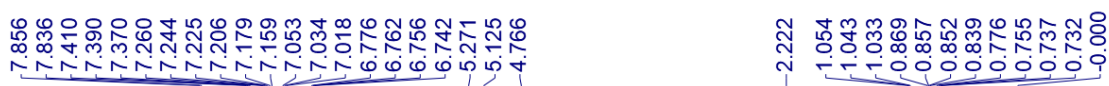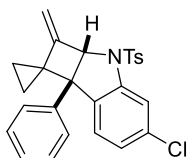

(<sup>1</sup>H NMR, 400 MHz, CDCl<sub>3</sub>)

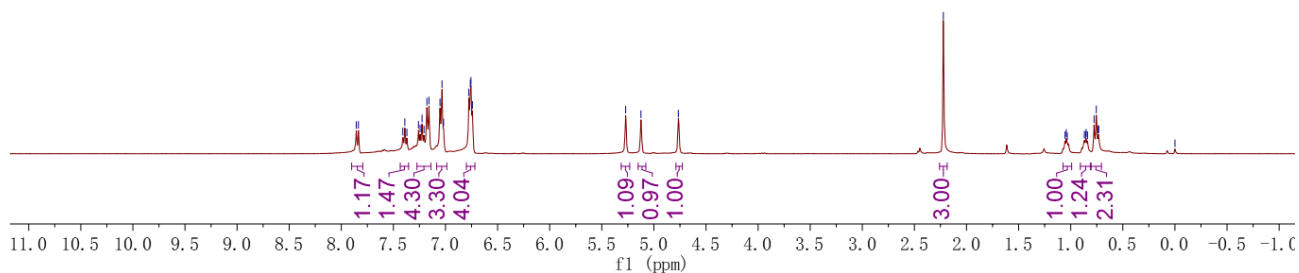

153.795  
 144.027  
 143.439  
 138.440  
 135.823  
 133.655  
 131.892  
 128.996  
 128.679  
 128.592  
 127.878  
 126.856  
 126.748  
 125.564  
 119.929  
 -105.518  
  
 77.318  
 77.000  
 76.683  
 73.233  
  
 -57.595  
  
 -39.638  
  
 ~21.306  
 ~18.313  
 ~14.511

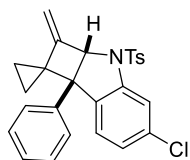

(<sup>13</sup>C NMR, 100 MHz, CDCl<sub>3</sub>)

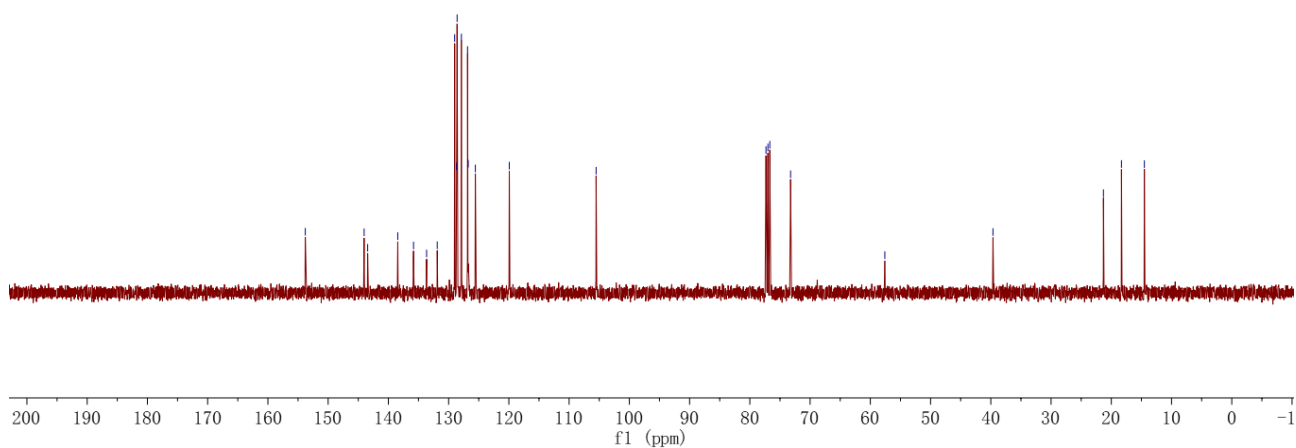

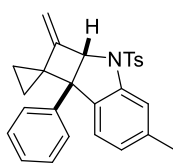

**5-methyl-2-methylene-7b-phenyl-3-tosyl-2,2a,3,7b-tetrahydrospiro[cyclobuta[b]indole-1,1'-cyclopropane] (2p):** Yield: 56 mg, 65%, white solid, m.p. >200 °C; Eluent: PE/EA = 30/1.  $^1\text{H}$  NMR (400 MHz,  $\text{CDCl}_3$ , TMS)  $\delta$  7.65 (s, 1H), 7.21 (d,  $J = 8.0$  Hz, 2H), 7.11 – 7.03 (m, 3H), 7.01 (d,  $J = 7.6$  Hz, 1H), 6.94 (d,  $J = 7.6$  Hz, 1H), 6.85 – 6.79 (m, 2H), 6.72 (d,  $J = 8.0$  Hz, 2H), 5.25 (s, 1H), 5.18 (s, 1H), 4.74 (s, 1H), 2.42 (s, 3H), 2.16 (s, 3H), 1.06 – 0.97 (m, 1H), 0.94 – 0.86 (m, 1H), 0.79 – 0.70 (m, 2H);  $^{13}\text{C}\{^1\text{H}\}$ -NMR (100 MHz,  $\text{CDCl}_3$ , TMS)  $\delta$  154.6, 143.4, 143.4, 139.8, 138.5, 133.8, 133.2, 129.0, 127.7, 127.0, 126.7, 126.4, 126.2, 125.8, 119.8, 104.9, 73.1, 57.7, 39.5, 21.6, 21.3, 18.3, 14.5; IR (neat):  $\nu$  3050, 2981, 2916, 1678, 1592, 1497, 1348, 1168, 1064, 898, 757, 674  $\text{cm}^{-1}$ ; HRMS (ESI-TOF) Calcd for  $\text{C}_{20}\text{H}_{19}\text{NO}_2\text{Na}$   $[\text{M}+\text{Na}]^+$ : 450.14982, found: 450.15029.

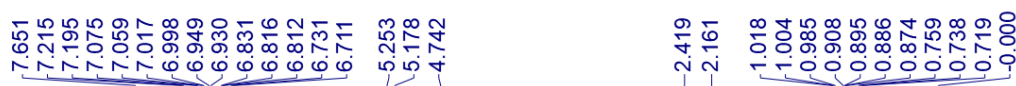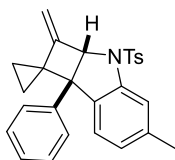

( $^1\text{H}$  NMR, 400 MHz,  $\text{CDCl}_3$ )

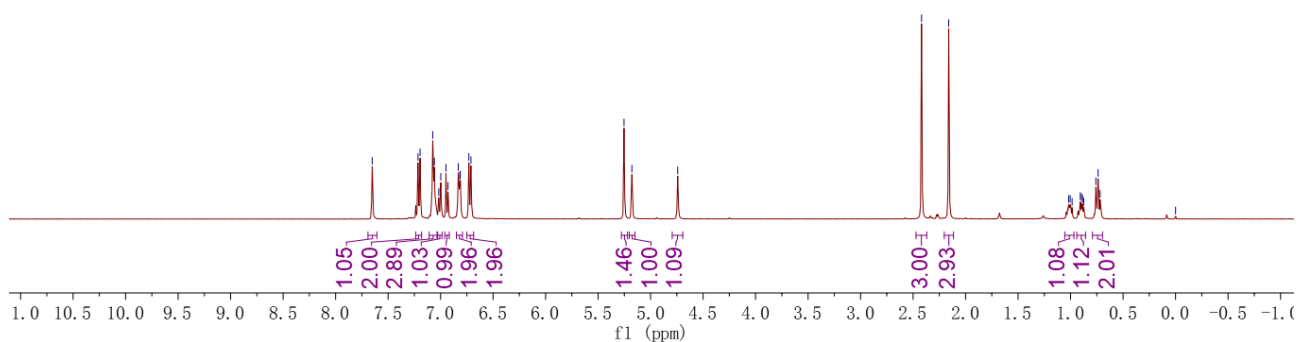

154.560  
 143.428  
 143.352  
 139.823  
 138.472  
 133.752  
 133.248  
 129.005  
 127.693  
 127.032  
 126.736  
 126.403  
 126.231  
 125.763  
 119.796  
 -104.895

77.317  
 76.999  
 76.681  
 73.128

-57.675

-39.550

21.550  
 21.273  
 18.258  
 14.462

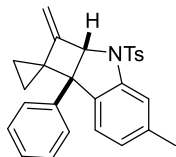

(<sup>13</sup>C NMR, 100 MHz, CDCl<sub>3</sub>)

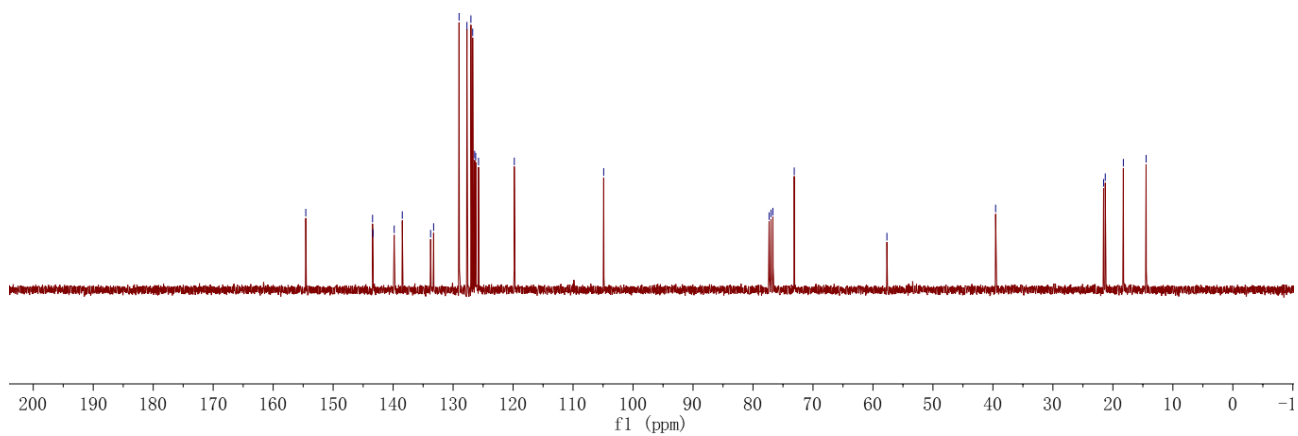

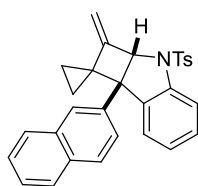

**2-methylene-7b-(naphthalen-2-yl)-3-tosyl-2,2a,3,7b-tetrahydrospiro[cyclobuta[*b*]indole-1,1'-cyclopropane] (2q):** Yield: 65 mg, 70%, white solid, m.p. >200 °C; Eluent: PE/EA = 30/1. <sup>1</sup>H NMR (400 MHz, CDCl<sub>3</sub>, TMS) δ 7.88 (d, *J* = 8.0 Hz, 1H), 7.82 – 7.74 (m, 1H), 7.70 (d, *J* = 8.4 Hz, 1H), 7.52 – 7.45 (m, 1H), 7.45 – 7.37 (m, 3H), 7.34 (dd, *J*<sub>1</sub> = 8.6 Hz, *J*<sub>2</sub> = 1.6 Hz, 1H), 7.28 (td, *J*<sub>1</sub> = 7.6 Hz, *J*<sub>2</sub> = 1.2 Hz, 1H), 7.20 (d, *J* = 7.6 Hz, 1H), 7.12 (d, *J* = 8.0 Hz, 2H), 6.91 (s, 1H), 6.41 (d, *J* = 8.0 Hz, 2H), 5.32 (s, 2H), 4.80 (s, 1H), 1.57 (s, 3H), 1.13 – 1.03 (m, 1H), 0.95 – 0.84 (m, 1H), 0.83 – 0.73 (m, 2H); <sup>13</sup>C{<sup>1</sup>H}-NMR (100 MHz, CDCl<sub>3</sub>, TMS) δ 154.3, 143.9, 143.5, 137.0, 136.3, 133.5, 132.6, 131.7, 128.7, 128.6, 127.8, 127.7, 127.3, 127.0, 126.8, 126.1, 125.8, 125.8, 125.7, 125.5, 120.0, 105.3, 72.8, 58.3, 39.7, 20.6, 18.5, 14.2; IR (neat): ν 3057, 2981, 1686, 1589, 1450, 1350, 1165, 1088, 1061, 886, 757 cm<sup>-1</sup>; HRMS (ESI-TOF) Calcd for C<sub>20</sub>H<sub>19</sub>NO<sub>2</sub>Na [M+Na]<sup>+</sup>: 486.14982, found: 486.15059.



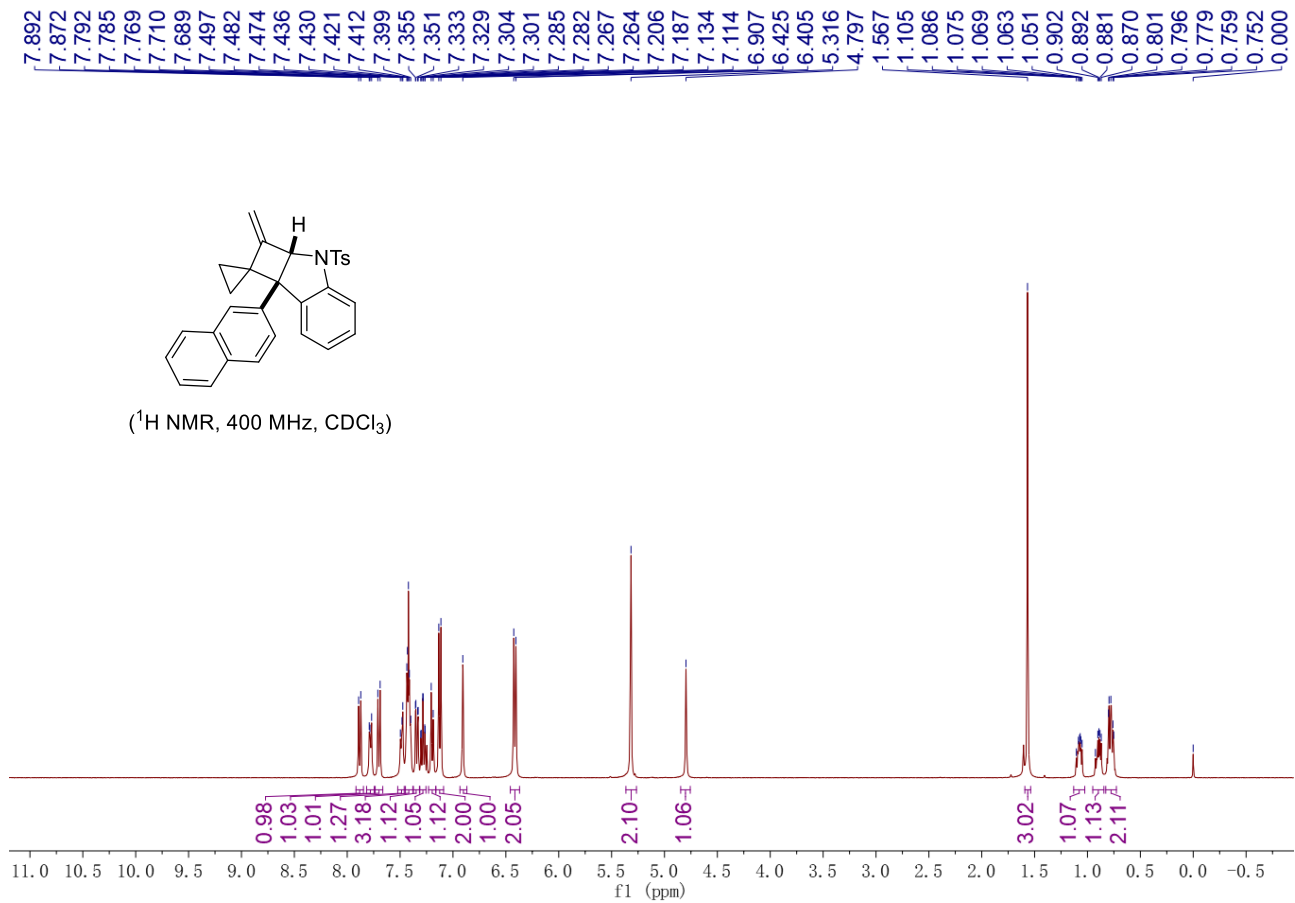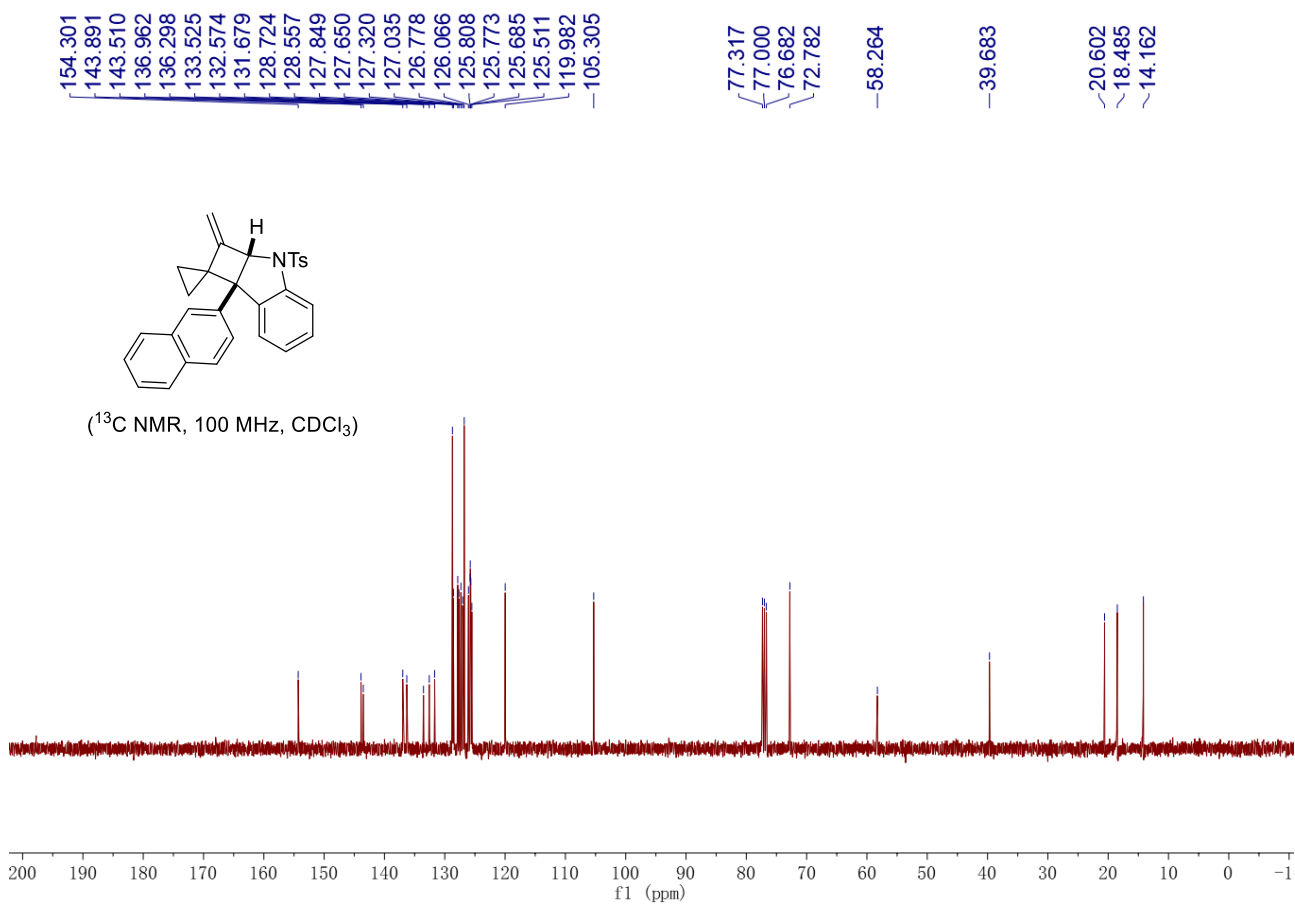

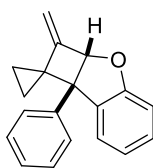

**2-methylene-7b-phenyl-2a,7b-dihydro-2H-spiro[cyclobuta[*b*]benzofuran-1,1'-cyclopropane]**

(**2r**): Yield: 43 mg, 82%, white solid, m.p. 89-91 °C; Eluent: PE/EA = 30/1. <sup>1</sup>H NMR (400 MHz, CDCl<sub>3</sub>, TMS) δ 7.41 – 7.26 (m, 4H), 7.26 – 7.11 (m, 3H), 7.00 – 6.85 (m, 2H), 5.55 (s, 1H), 5.18 (s, 1H), 4.76 (s, 1H), 1.11 – 0.96 (m, 2H), 0.96 – 0.79 (m, 2H); <sup>13</sup>C{<sup>1</sup>H}-NMR (100 MHz, CDCl<sub>3</sub>, TMS) δ 161.2, 155.4, 140.3, 130.6, 128.6, 128.3, 127.0, 126.7, 126.1, 120.9, 111.0, 105.2, 88.8, 59.1, 39.3, 17.8, 14.8; IR (neat): ν 3058, 2961, 2859, 1591, 1471, 1207, 1041, 1024, 760, 699 cm<sup>-1</sup>; HRMS (EI-TOF) Calcd for C<sub>20</sub>H<sub>19</sub>NO<sub>2</sub>Na [M+Na]<sup>+</sup>: 260.1196, found: 260.1190.

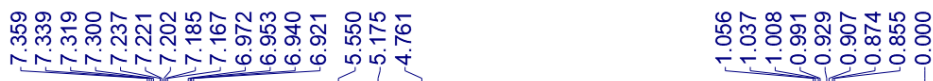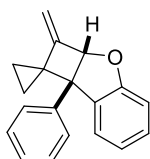

(<sup>1</sup>H NMR, 400 MHz, CDCl<sub>3</sub>)

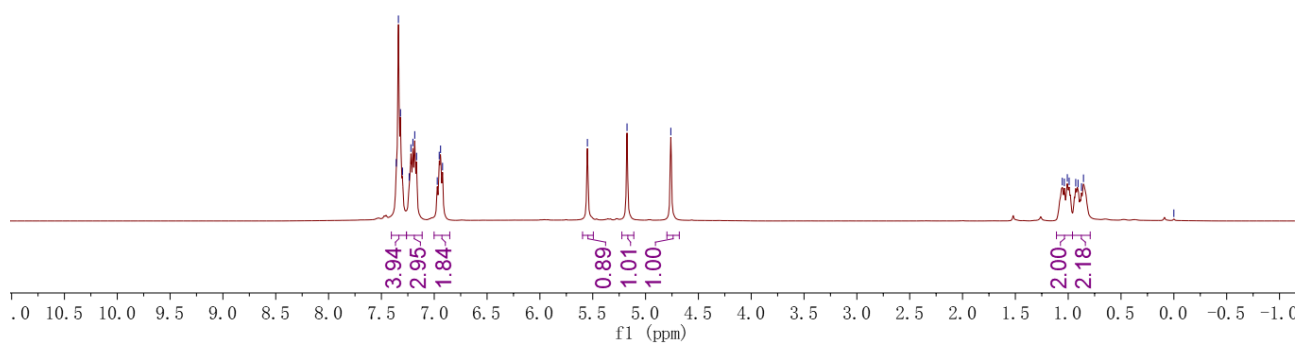

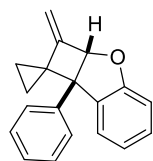

(<sup>13</sup>C NMR, 100 MHz, CDCl<sub>3</sub>)

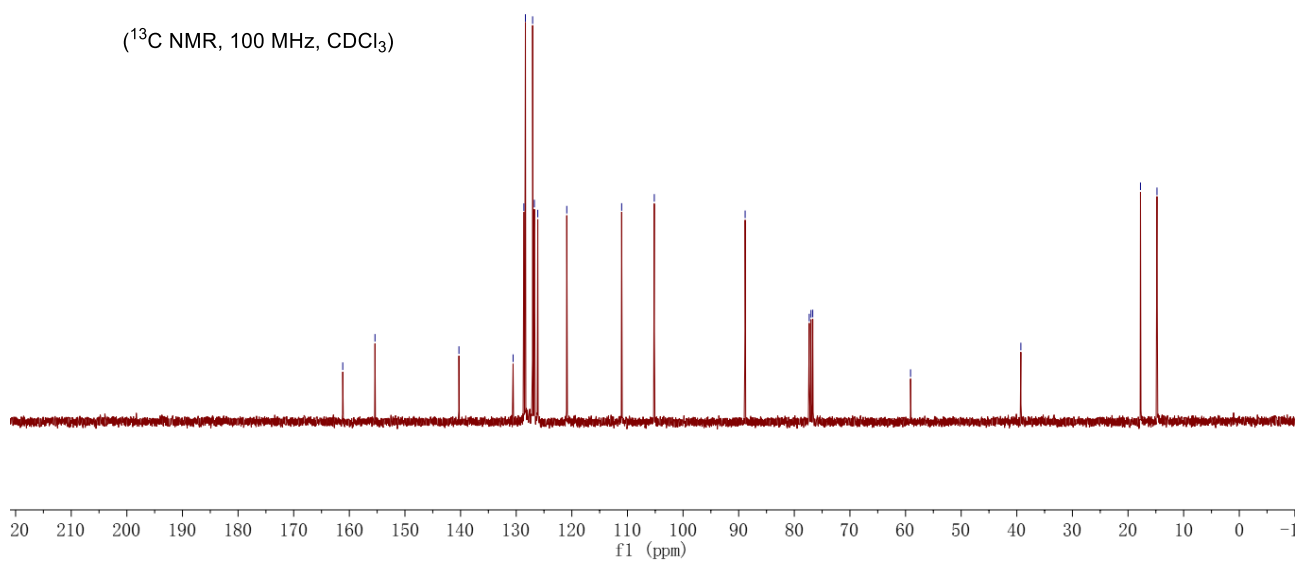

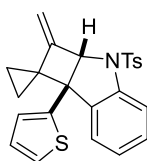

**2-methylene-7b-(thiophen-2-yl)-3-tosyl-2,2a,3,7b-tetrahydrospiro[cyclobuta[*b*]indole-1,1'-cyclopropane] (2s):** Yield: 63 mg, 75%, white solid, m.p. 164-166 °C; Eluent: PE/EA = 30/1. <sup>1</sup>H NMR (400 MHz, CDCl<sub>3</sub>, TMS) δ 7.80 (d, *J* = 8.0 Hz, 1H), 7.36 (t, *J* = 7.6 Hz, 1H), 7.29 (d, *J* = 8.0 Hz, 2H), 7.22 – 7.08 (m, 2H), 7.07 (d, *J* = 5.2 Hz, 1H), 6.84 (d, *J* = 8.0 Hz, 2H), 6.76 – 6.68 (m, 1H), 6.25 (d, *J* = 3.4 Hz, 1H), 5.32 – 5.21 (m, 2H), 4.75 (s, 1H), 2.22 (s, 3H), 1.24 – 1.11 (m, 1H), 1.10 – 0.94 (m, 1H), 0.91 – 0.64 (m, 2H); <sup>13</sup>C{<sup>1</sup>H}-NMR (100 MHz, CDCl<sub>3</sub>, TMS) δ 153.5, 144.8, 143.7, 142.9, 136.7, 133.9, 129.2, 129.2, 128.9, 126.9, 126.4, 126.0, 125.4, 125.1, 124.4, 119.0, 105.3, 74.1, 55.7, 40.4, 21.4, 18.1, 14.1; IR (neat): ν 3063, 2998, 2914, 1597, 1463, 1347, 1166, 1087, 1063, 882, 759, 683 cm<sup>-1</sup>; HRMS (ESI-TOF) Calcd for C<sub>20</sub>H<sub>19</sub>NO<sub>2</sub>Na [M+Na]<sup>+</sup>: 442.09059, found: 442.09130.

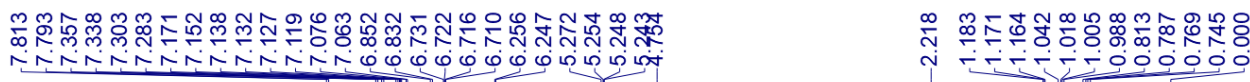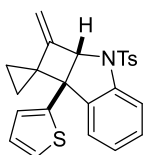

(<sup>1</sup>H NMR, 400 MHz, CDCl<sub>3</sub>)

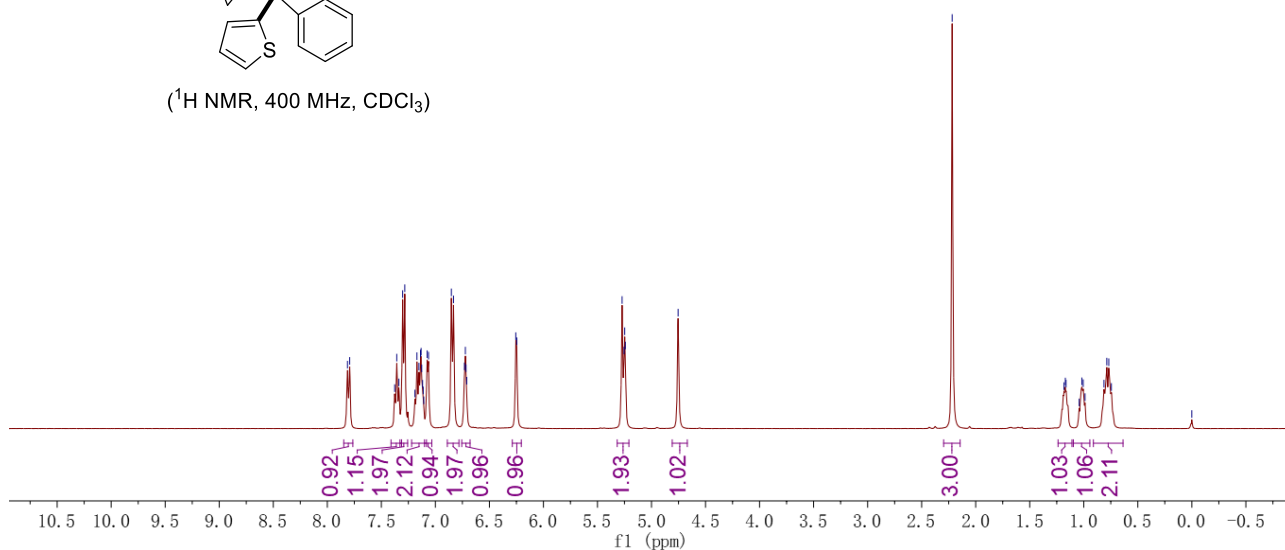

153.534  
144.779  
143.681  
142.920  
136.673  
133.937  
129.200  
129.175  
128.873  
126.885  
126.374  
126.039  
125.387  
125.072  
124.427  
118.966  
105.330

77.298  
77.000  
76.664  
74.142

55.689

40.417

21.388  
18.099  
14.136

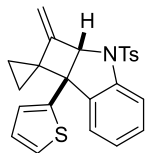

(<sup>13</sup>C NMR, 100 MHz, CDCl<sub>3</sub>)

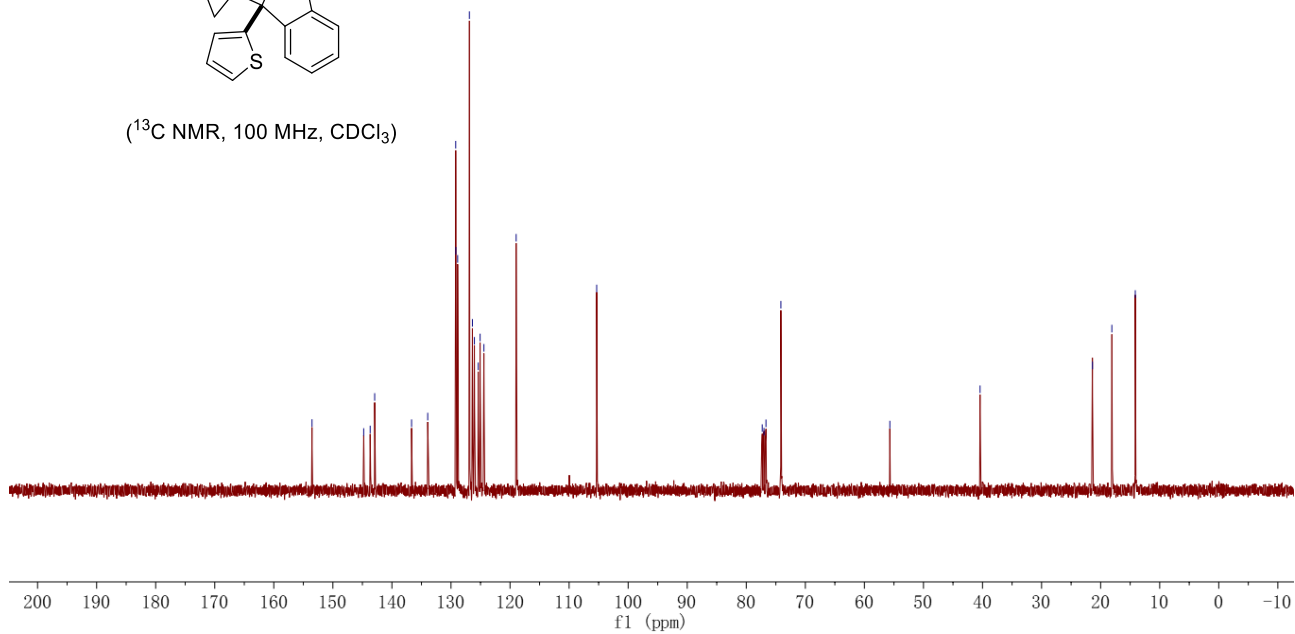

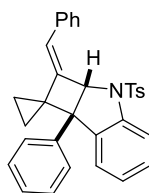

**2-((Z)-benzylidene)-7b-phenyl-3-tosyl-2,2a,3,7b-tetrahydrospiro[cyclobuta[*b*]indole-1,1'-cyclopropane] (2t):** Yield: 62 mg, 63%, white solid, m.p. >200 °C; Eluent: PE/EA = 30/1. <sup>1</sup>H NMR (400 MHz, CDCl<sub>3</sub>, TMS) δ 7.81 (d, *J* = 8.0 Hz, 1H), 7.71 (d, *J* = 8.0 Hz, 2H), 7.45 – 7.34 (m, 3H), 7.30 – 7.22 (m, 2H), 7.17 – 7.04 (m, 4H), 7.00 (d, *J* = 8.0 Hz, 2H), 6.84 (d, *J* = 7.2 Hz, 2H), 6.56 (d, *J* = 8.0 Hz, 2H), 5.91 (s, 1H), 5.75 (s, 1H), 2.14 (s, 3H), 1.13 – 1.00 (m, 1H), 0.90 – 0.73 (m, 3H); <sup>13</sup>C{<sup>1</sup>H}-NMR (100 MHz, CDCl<sub>3</sub>, TMS) δ 145.2, 143.5, 139.0, 137.3, 134.8, 132.9, 128.9, 128.8, 128.3, 128.2, 127.7, 127.4, 127.3, 127.1, 126.9, 126.0, 125.7, 121.8, 121.7, 74.4, 58.8, 41.1, 21.3, 19.4, 14.3; IR (neat): ν 3050, 3024, 2919, 2852, 1589, 1453, 1350, 1167, 1088, 811, 752, 676 cm<sup>-1</sup>; HRMS (ESI-TOF) Calcd for C<sub>20</sub>H<sub>19</sub>NO<sub>2</sub>Na [M+Na]<sup>+</sup>: 512.16547, found: 512.16534.

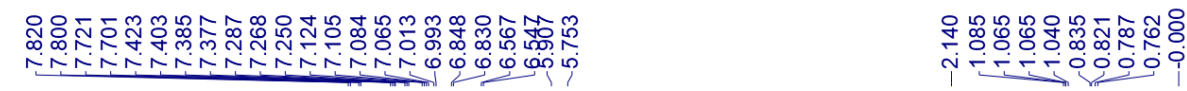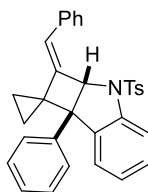

(<sup>1</sup>H NMR, 400 MHz, CDCl<sub>3</sub>)

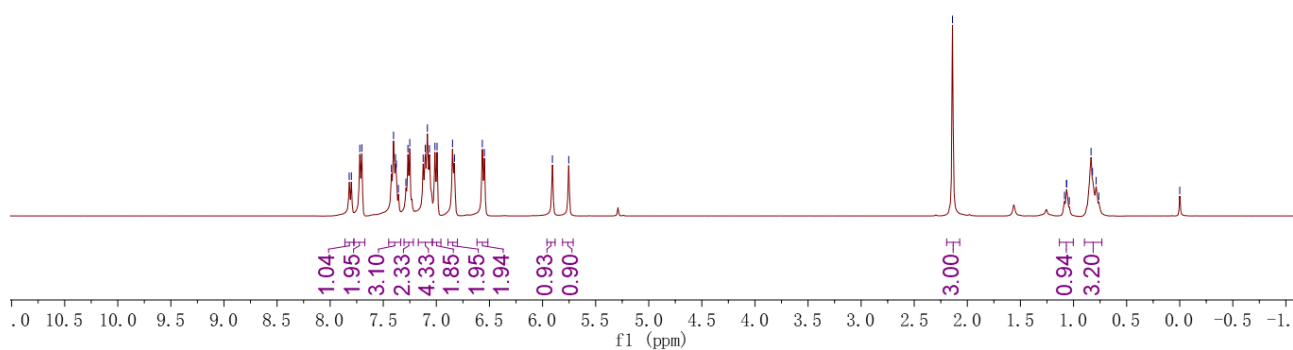

145.171  
143.466  
139.034  
137.285  
134.846  
132.864  
128.855  
128.782  
128.314  
128.205  
127.682  
127.413  
127.255  
127.090  
126.941  
126.028  
125.670  
121.843  
121.653

77.316  
76.999  
76.681  
74.379

—58.837

—41.110

~21.335  
~19.441  
~14.344

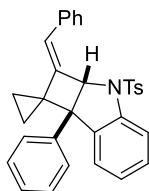

(<sup>13</sup>C NMR, 100 MHz, CDCl<sub>3</sub>)

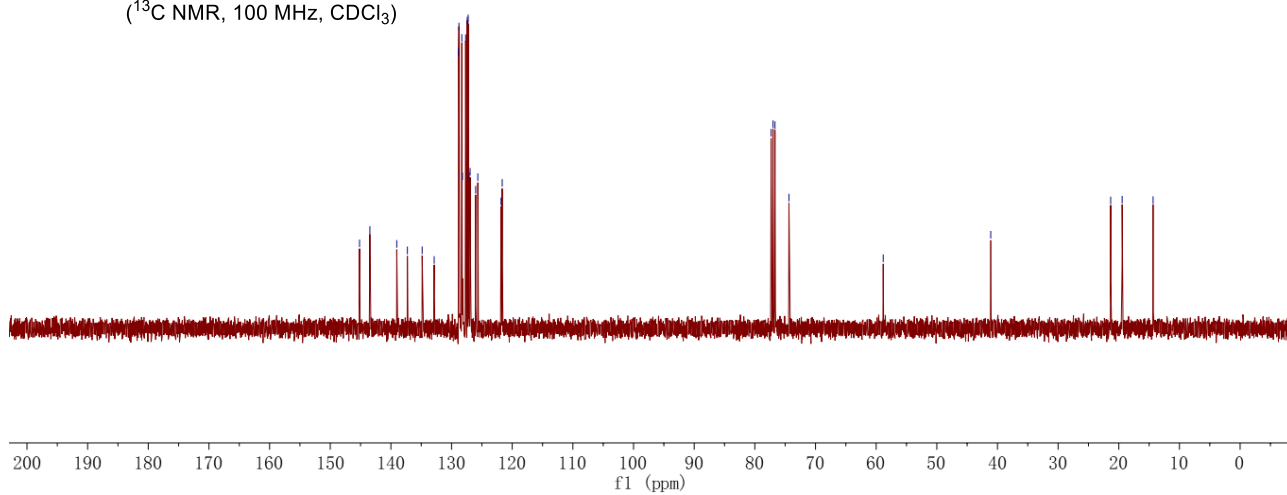

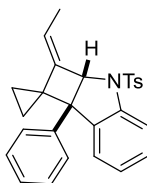

**(Z)-2-ethylidene-7b-phenyl-3-tosyl-2,2a,3,7b-tetrahydrospiro[cyclobuta[b]indole-1,1'-cyclopropane] (2u):** Yield: 26 mg, 30%, white solid, m.p. >200 °C; Eluent: PE/EA = 30/1.  $^1\text{H}$  NMR (400 MHz,  $\text{CDCl}_3$ , TMS)  $\delta$  7.87 (d,  $J = 8.4$  Hz, 1H), 7.37 (t,  $J = 8.0$  Hz, 1H), 7.21 (t,  $J = 7.6$  Hz, 1H), 7.11 (d,  $J = 8.0$  Hz, 2H), 7.09 – 6.98 (m, 4H), 6.80 (d,  $J = 7.2$  Hz, 2H), 6.64 (d,  $J = 8.0$  Hz, 2H), 5.29 (s, 1H), 5.14 (q,  $J = 7.2$  Hz, 1H), 2.14 (s, 3H), 1.90 (d,  $J = 7.2$  Hz, 3H), 1.01 – 0.87 (m, 1H), 0.85 – 0.73 (m, 1H), 0.73 – 0.55 (m, 2H);  $^{13}\text{C}\{^1\text{H}\}$ -NMR (100 MHz,  $\text{CDCl}_3$ , TMS)  $\delta$  143.5, 143.4, 143.2, 139.9, 136.8, 133.3, 129.0, 128.3, 127.7, 127.3, 127.0, 126.9, 125.7, 125.5, 120.4, 117.3, 72.8, 57.8, 39.4, 21.4, 18.0, 14.1, 13.3; IR (neat):  $\nu$  3047, 2979, 2919, 1594, 1456, 1351, 1168, 1153, 1089, 1059, 812, 757, 672  $\text{cm}^{-1}$ ; HRMS (ESI-TOF) Calcd for  $\text{C}_{20}\text{H}_{19}\text{NO}_2\text{Na}$   $[\text{M}+\text{Na}]^+$ : 450.14982, found: 450.14975.

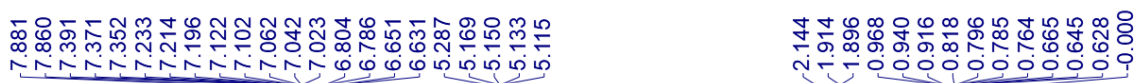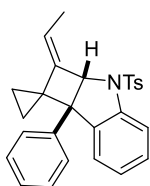

$^1\text{H}$  NMR, 400 MHz,  $\text{CDCl}_3$ )

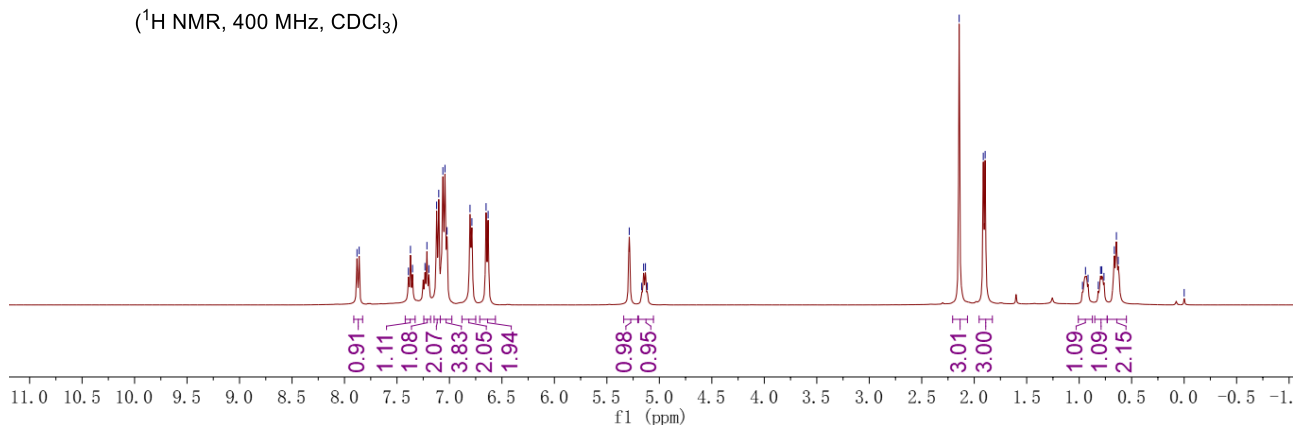



143.505  
143.447  
143.235  
139.933  
136.785  
133.291  
128.987  
128.270  
127.665  
127.309  
126.956  
126.927  
125.655  
125.524  
120.364  
117.335

77.353  
77.035  
76.717  
72.810

57.796

39.360

21.362  
17.957  
14.085  
13.300

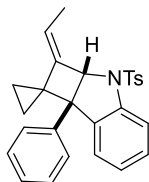

(<sup>13</sup>C NMR, 100 MHz, CDCl<sub>3</sub>)

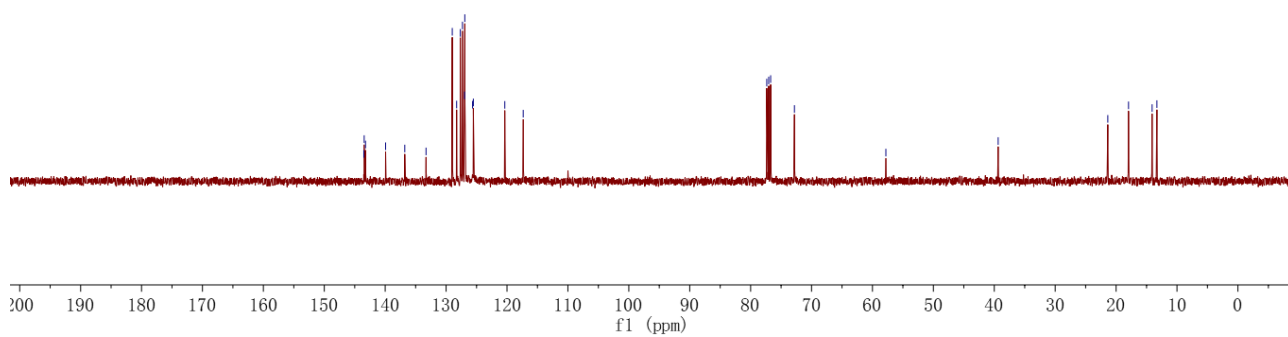

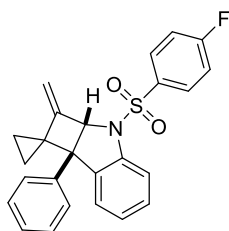

**3-((4-fluorophenyl)sulfonyl)-2-methylene-7b-phenyl-2,2a,3,7b-tetrahydrospiro[cyclobuta[*b*]indole-1,1'-cyclopropane] (2v):** Yield: 54 mg, 65%, white solid, m.p. 169-171 °C; Eluent: PE/EA = 30/1. <sup>1</sup>H NMR (400 MHz, CDCl<sub>3</sub>, TMS) δ 7.83 (d, *J* = 8.4 Hz, 1H), 7.39 (t, *J* = 8.0 Hz, 1H), 7.33 – 7.27 (m, 2H), 7.23 (t, *J* = 7.6 Hz, 1H), 7.16 – 7.10 (m, 3H), 7.08 (d, *J* = 7.6 Hz, 1H), 6.89 – 6.82 (m, 2H), 6.58 (t, *J* = 8.4 Hz, 2H), 5.27 (s, 1H), 5.18 (s, 1H), 4.78 (s, 1H), 1.11 – 1.01 (m, 1H), 0.98 – 0.87 (m, 1H), 0.79 – 0.70 (m, 2H); <sup>13</sup>C{<sup>1</sup>H}-NMR (100 MHz, CDCl<sub>3</sub>, TMS) δ 165.2 (d, *J* = 253.5 Hz), 154.1, 143.1, 139.7, 136.3, 132.8 (d, *J* = 3.1 Hz), 129.6 (d, *J* = 9.5 Hz), 128.5, 128.0, 127.1, 127.1, 126.3, 125.7, 119.7, 115.7 (d, *J* = 22.4 Hz), 105.4, 73.3, 58.0, 39.8, 18.5, 14.7; <sup>19</sup>F NMR (376 MHz, CDCl<sub>3</sub>) δ -105.0; IR (neat): ν 3047, 2974, 2927, 1589, 1492, 1359, 1239, 1172, 1153, 1087, 893, 782, 677 cm<sup>-1</sup>; HRMS (ESI-TOF) Calcd for C<sub>20</sub>H<sub>19</sub>NO<sub>2</sub>Na [M+Na]<sup>+</sup>: 440.10910, found: 440.10913.

7.837  
7.816  
7.385  
7.317  
7.304  
7.295  
7.282  
7.251  
7.232  
7.138  
7.124  
7.090  
7.071  
6.869  
6.862  
6.859  
6.855  
6.852  
6.848  
6.845  
6.603  
6.582  
5.560  
5.211  
5.176  
4.776

1.070  
1.060  
1.056  
1.049  
1.037  
0.939  
0.928  
0.924  
0.917  
0.905  
0.778  
0.757  
0.735

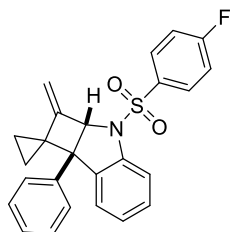

(<sup>1</sup>H NMR, 400 MHz, CDCl<sub>3</sub>)

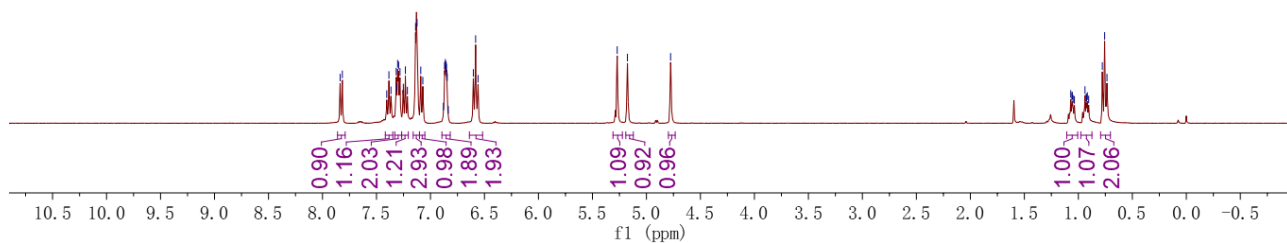

166.413  
163.878  
154.081  
143.068  
139.701  
136.313  
132.690  
132.659  
129.567  
129.472  
128.550  
128.014  
127.112  
127.069  
126.322  
125.662  
119.675  
115.766  
115.542  
105.383  
77.317  
76.999  
76.681  
73.324  
58.019  
39.767  
18.480  
14.673

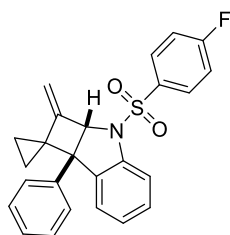

(<sup>13</sup>C NMR, 100 MHz, CDCl<sub>3</sub>)

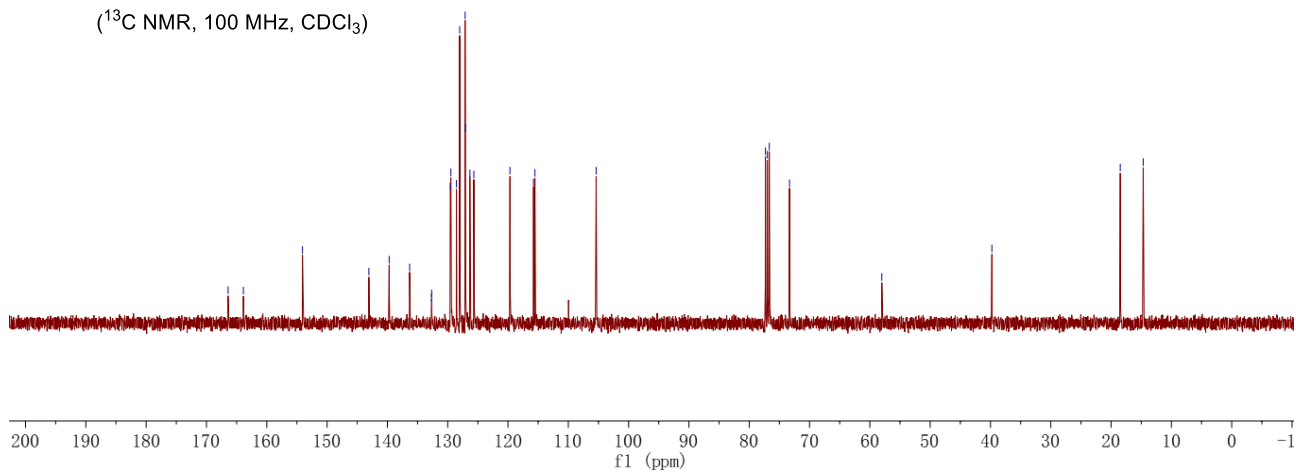

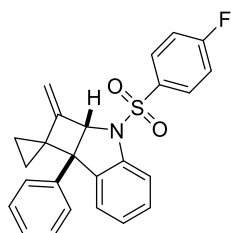

(<sup>19</sup>F NMR, 376 MHz, CDCl<sub>3</sub>)

---104.995

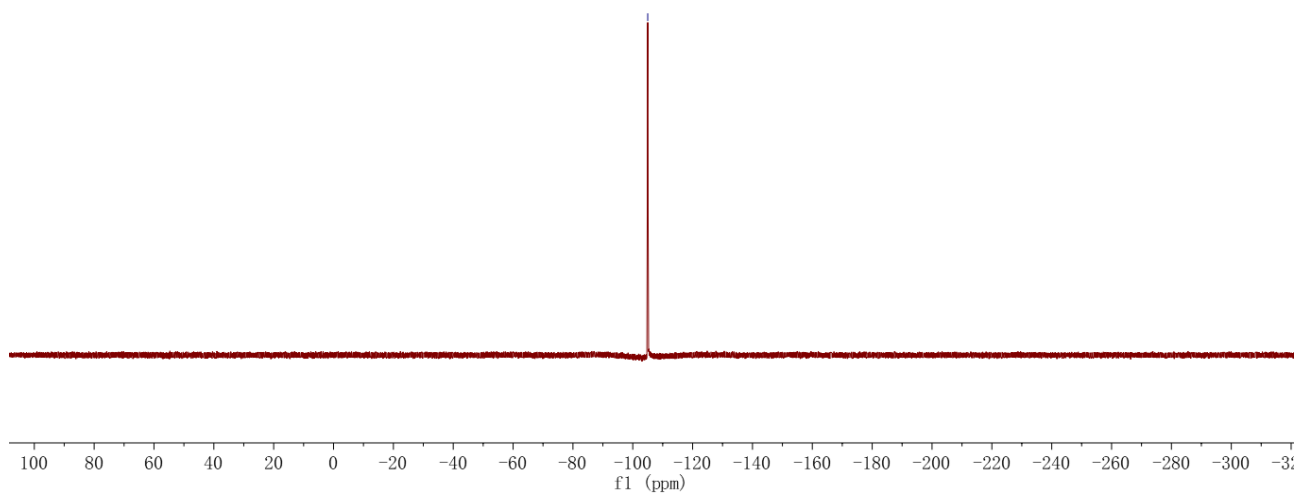

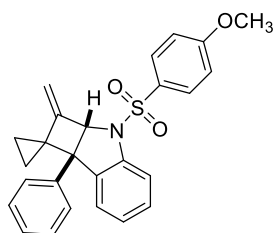

**3-((4-methoxyphenyl)sulfonyl)-2-methylene-7b-phenyl-2,2a,3,7b-tetrahydrospiro[cyclobuta[*b*]indole-1,1'-cyclopropane] (2W):** Yield: 54 mg, 63%, white solid, m.p. 177-179 °C; Eluent: PE/EA = 30/1. <sup>1</sup>H NMR (400 MHz, CDCl<sub>3</sub>, TMS) δ 7.83 (d, *J* = 8.0 Hz, 1H), 7.37 (t, *J* = 8.0 Hz, 1H), 7.28 – 7.19 (m, 3H), 7.08 (m, 4H), 6.86 (m, 2H), 6.39 (d, *J* = 8.4 Hz, 2H), 5.27 (s, 1H), 5.17 (s, 1H), 4.76 (s, 1H), 3.68 (s, 3H), 1.05 (m, 1H), 0.93 (m, 1H), 0.75 (m, 2H); <sup>13</sup>C{<sup>1</sup>H}-NMR (100 MHz, CDCl<sub>3</sub>, TMS) δ 162.9, 154.5, 143.4, 139.9, 136.3, 128.9, 128.4, 128.3, 127.8, 127.1, 126.8, 126.0, 125.3, 119.5, 113.5, 105.0, 73.1, 58.0, 55.2, 39.7, 18.4, 14.7; IR (neat): ν 3066, 2979, 2961, 1589, 1492, 1349, 1262, 1088, 1028, 834, 759, 679 cm<sup>-1</sup>; HRMS (ESI-TOF) Calcd for C<sub>20</sub>H<sub>19</sub>NO<sub>2</sub>Na [M+Na]<sup>+</sup>: 452.12909, found: 452.12975.

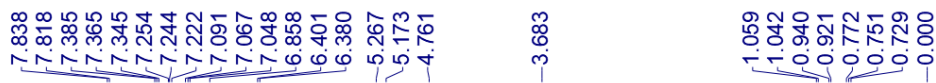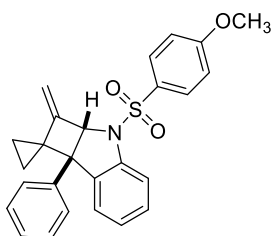

(<sup>1</sup>H NMR, 400 MHz, CDCl<sub>3</sub>)

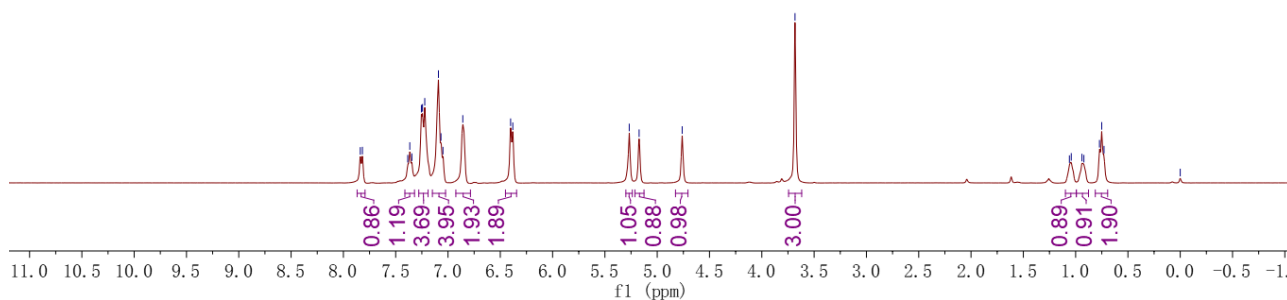

162.866  
 154.483  
 143.417  
 139.872  
 136.277  
 128.854  
 128.351  
 128.305  
 127.812  
 127.094  
 126.838  
 126.017  
 125.276  
 119.512  
 113.528  
 105.029  
 77.317  
 76.999  
 76.680  
 73.056  
 58.006  
 55.167  
 39.677  
 18.356  
 14.717

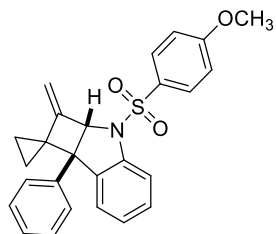

(<sup>13</sup>C NMR, 100 MHz, CDCl<sub>3</sub>)

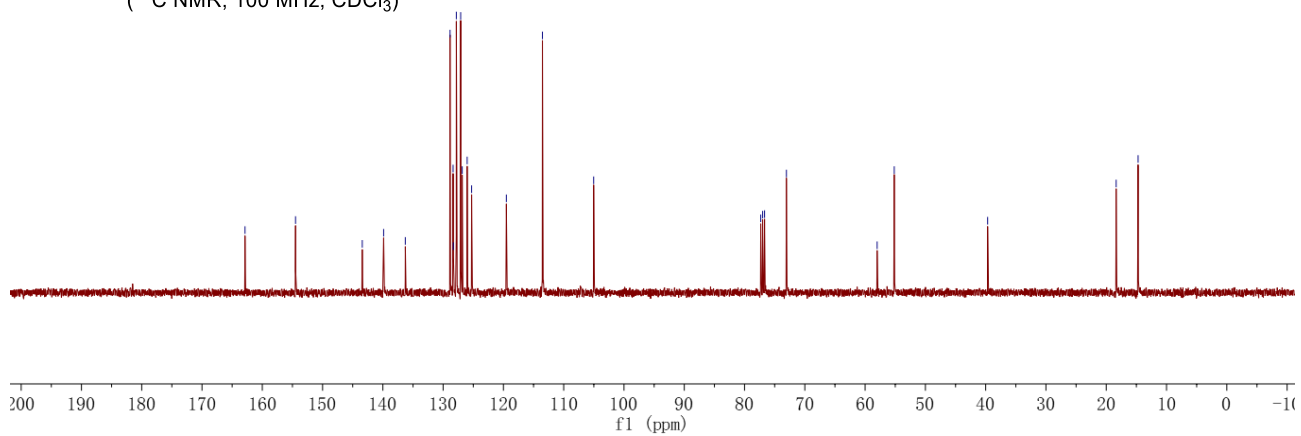

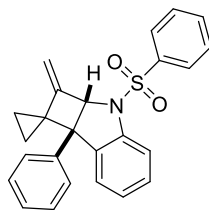

**2-methylene-7b-phenyl-3-(phenylsulfonyl)-2,2a,3,7b-tetrahydrospiro[cyclobuta[*b*]indole-1,1'-cyclopropane] (2x):** Yield: 52 mg, 65%, white solid, m.p. 171-173 °C; Eluent: PE/EA = 30/1.  $^1\text{H}$  NMR (400 MHz,  $\text{CDCl}_3$ , TMS)  $\delta$  7.82 (d,  $J = 8.4$  Hz, 1H), 7.43 – 7.31 (m, 3H), 7.27 – 7.14 (m, 2H), 7.09 (m, 3H), 7.04 (d,  $J = 7.4$  Hz, 1H), 6.99 (t,  $J = 8.0$  Hz, 2H), 6.89 – 6.79 (m, 2H), 5.27 (s, 1H), 5.23 (s, 1H), 4.77 (s, 1H), 1.10 – 1.00 (m, 1H), 1.00 – 0.91 (m, 1H), 0.80 – 0.70 (m, 2H);  $^{13}\text{C}\{^1\text{H}\}$ -NMR (100 MHz,  $\text{CDCl}_3$ , TMS)  $\delta$  154.4, 143.1, 140.0, 137.1, 136.1, 132.9, 128.4, 128.0, 127.0, 126.8, 126.8, 126.2, 125.2, 118.9, 105.2, 72.8, 58.0, 39.6, 18.3, 14.9; IR (neat):  $\nu$  3058, 3003, 2922, 1597, 1448, 1352, 1168, 1089, 1050, 1027, 914, 890, 740, 685  $\text{cm}^{-1}$ ; HRMS (ESI-TOF) Calcd for  $\text{C}_{20}\text{H}_{19}\text{NO}_2\text{Na}$   $[\text{M}+\text{Na}]^+$ : 422.11852, found: 422.11780.

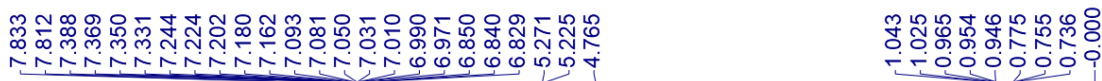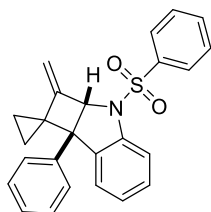

( $^1\text{H}$  NMR, 400 MHz,  $\text{CDCl}_3$ )

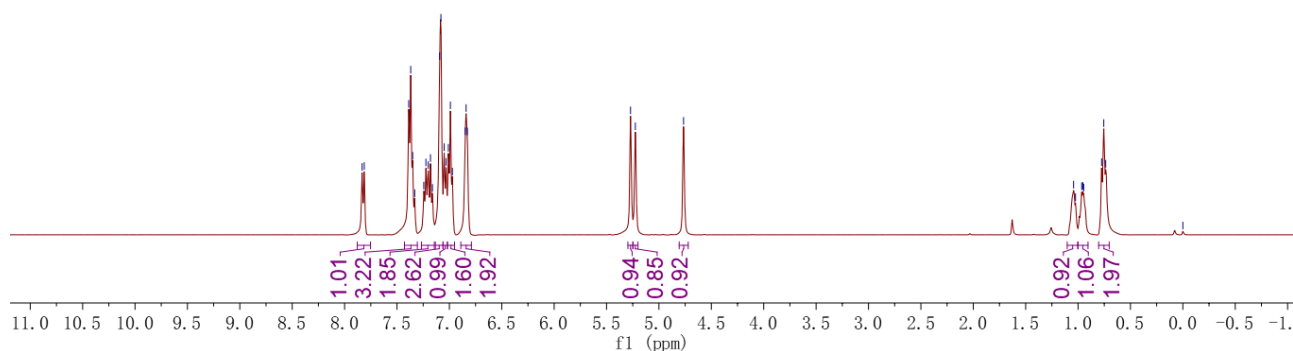

154.376  
 143.112  
 139.953  
 137.068  
 136.057  
 132.903  
 128.428  
 128.008  
 126.994  
 126.825  
 126.807  
 126.213  
 125.184  
 118.893  
 105.164  
 77.317  
 76.999  
 76.680  
 72.810  
 57.963  
 39.616  
 18.258  
 14.888

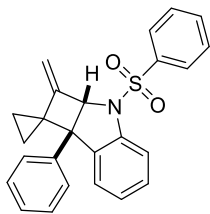

(<sup>13</sup>C NMR, 100 MHz, CDCl<sub>3</sub>)

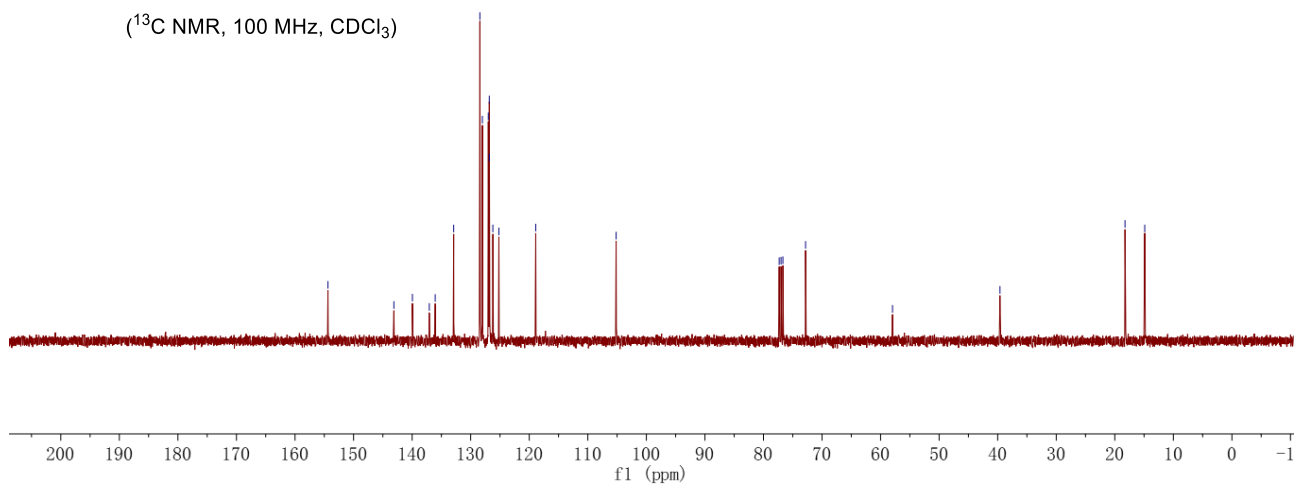



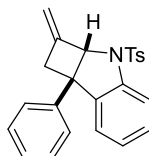

**2-methylene-7b-phenyl-3-tosyl-2,2a,3,7b-tetrahydro-1H-cyclobuta[b]indole (2aa):** Yield: 63 mg, 81%, white solid, m.p. 152-154 °C; Eluent: PE/EA = 30/1.  $^1\text{H}$  NMR (400 MHz,  $\text{CDCl}_3$ , TMS)  $\delta$  7.80 (d,  $J = 8.0$  Hz, 1H), 7.54 (d,  $J = 8.4$  Hz, 2H), 7.28 (t,  $J = 7.6$  Hz, 1H), 7.14 – 6.97 (m, 7H), 6.49 (d,  $J = 7.2$  Hz, 2H), 5.51 (dd,  $J_1 = 2.8$  Hz,  $J_2 = 2.4$  Hz, 1H), 5.20 – 5.14 (m, 1H), 5.14 – 5.06 (m, 1H), 3.48 (dt,  $J_1 = 16$  Hz,  $J_2 = 2.8$  Hz, 1H), 3.04 (dq,  $J_1 = 16$  Hz,  $J_2 = 2.4$  Hz, 1H), 2.35 (s, 3H);  $^{13}\text{C}\{^1\text{H}\}$ -NMR (100 MHz,  $\text{CDCl}_3$ , TMS)  $\delta$  144.6, 143.9, 143.0, 142.5, 138.6, 135.2, 129.6, 128.5, 128.1, 127.0, 126.1, 125.8, 125.6, 125.2, 117.2, 113.3, 73.0, 53.7, 43.5, 21.5; IR (neat):  $\nu$  3052, 3026, 2925, 1597, 1471, 1356, 1091, 1028, 758, 678  $\text{cm}^{-1}$ ; HRMS (ESI-TOF) Calcd for  $\text{C}_{20}\text{H}_{19}\text{NO}_2\text{Na}$   $[\text{M}+\text{Na}]^+$ : 410.11852, found: 410.11897.

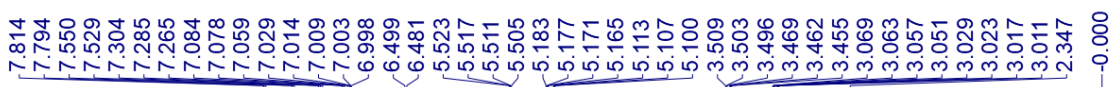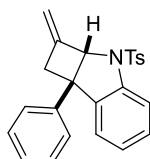

( $^1\text{H}$  NMR, 400 MHz,  $\text{CDCl}_3$ )

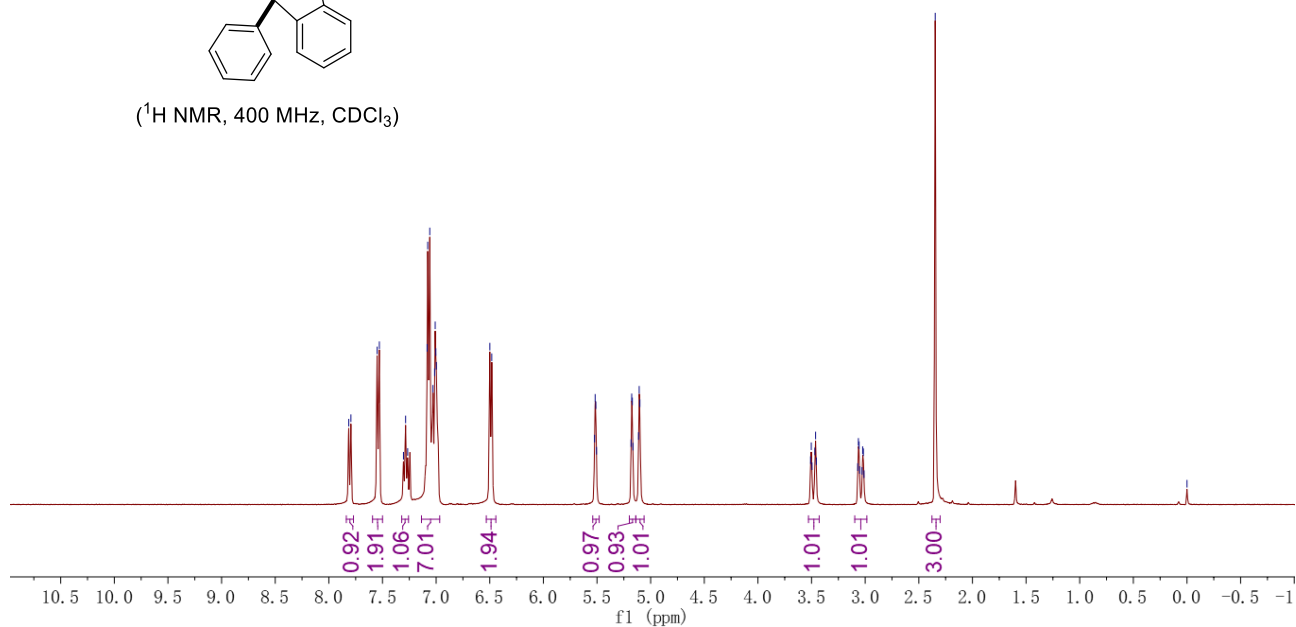

144.642  
143.886  
143.041  
142.515  
138.636  
135.214  
129.637  
128.496  
128.086  
127.033  
126.103  
125.828  
125.634  
125.162  
117.244  
113.327

77.317  
77.000  
76.680  
73.048

-53.702

-43.505

-21.465

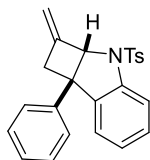

(<sup>13</sup>C NMR, 100 MHz, CDCl<sub>3</sub>)

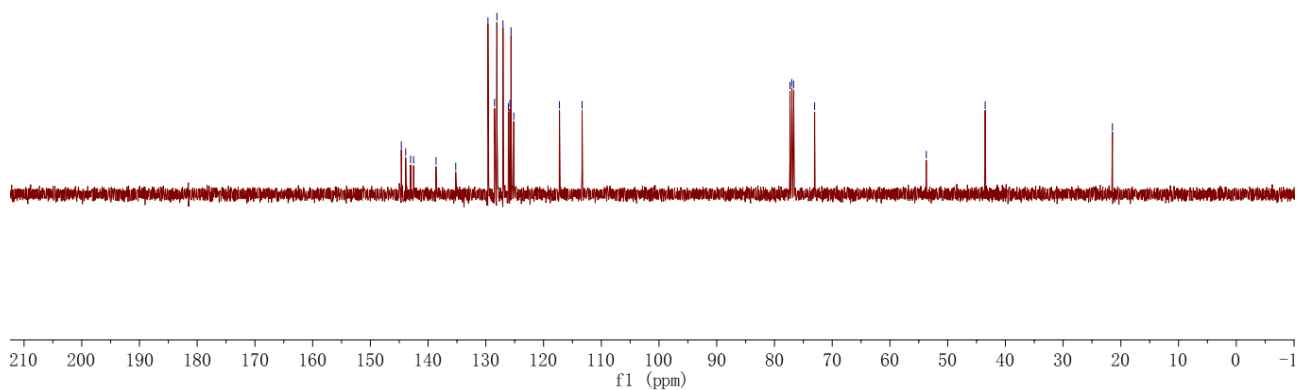

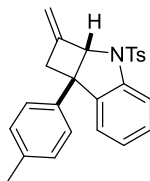

**2-methylene-7b-(p-tolyl)-3-tosyl-2,2a,3,7b-tetrahydro-1H-cyclobuta[b]indole (2ab):** Yield: 68 mg, 85%, white solid, m.p. 156-158 °C; Eluent: PE/EA = 30/1.  $^1\text{H}$  NMR (400 MHz,  $\text{CDCl}_3$ , TMS)  $\delta$  7.80 (d,  $J = 8.0$  Hz, 1H), 7.54 (d,  $J = 7.6$  Hz, 2H), 7.31 – 7.23 (m, 1H), 7.07 (m, 3H), 6.99 (d,  $J = 7.6$  Hz, 1H), 6.82 (d,  $J = 8.0$  Hz, 2H), 6.38 (d,  $J = 8.0$  Hz, 2H), 5.51 (dd,  $J_1 = 2.8$  Hz,  $J_2 = 2.4$  Hz, 1H), 5.14 (q,  $J = 2.4$  Hz, 1H), 5.10 (q,  $J = 2.4$  Hz, 1H), 3.46 (dt,  $J_1 = 16.0$  Hz,  $J_2 = 2.8$  Hz, 1H), 3.02 (dq,  $J_1 = 16.0$  Hz,  $J_2 = 2.4$  Hz, 1H), 2.36 (s, 3H), 2.26 (s, 3H);  $^{13}\text{C}\{^1\text{H}\}$ -NMR (100 MHz,  $\text{CDCl}_3$ , TMS)  $\delta$  144.8, 143.9, 142.5, 140.2, 138.8, 135.7, 135.3, 129.6, 128.8, 128.4, 127.1, 125.8, 125.6, 125.2, 117.2, 113.3, 73.1, 53.5, 43.6, 21.5, 20.9; IR (neat):  $\nu$  3026, 2945, 2924, 2845, 1589, 1508, 1450, 1351, 1086, 1055, 935, 810, 763, 684  $\text{cm}^{-1}$ ; HRMS (ESI-TOF) Calcd for  $\text{C}_{20}\text{H}_{19}\text{NO}_2\text{Na}$   $[\text{M}+\text{Na}]^+$ : 424.13417, found: 424.13473.

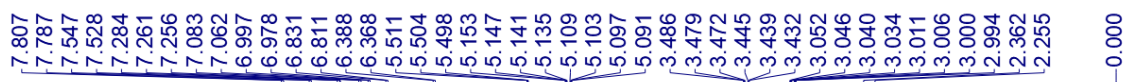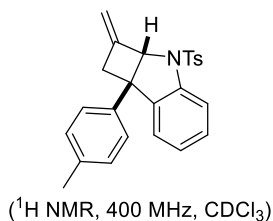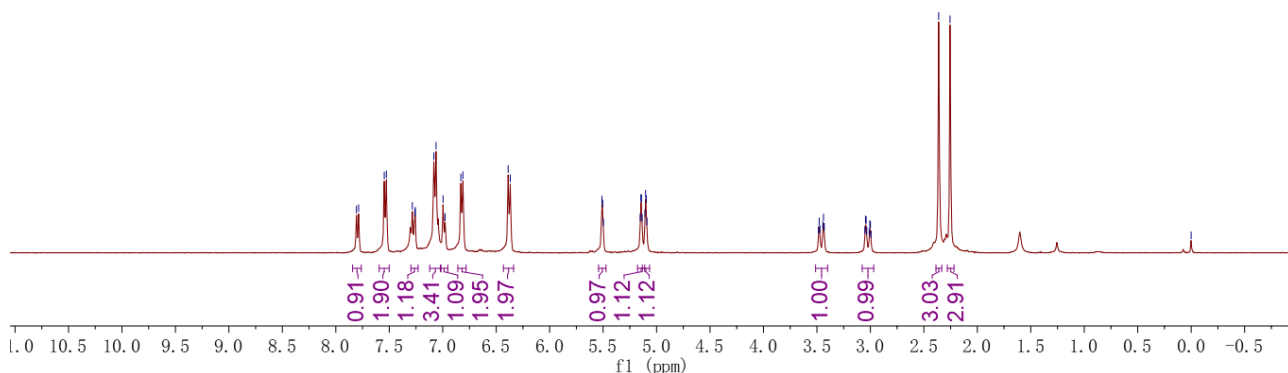

144.754  
143.875  
142.497  
140.219  
138.844  
135.743  
135.299  
129.589  
128.757  
128.434  
127.051  
125.792  
125.570  
125.163  
117.243  
113.262  
77.317  
76.999  
76.682  
73.088  
-53.470  
-43.551  
21.478  
20.909

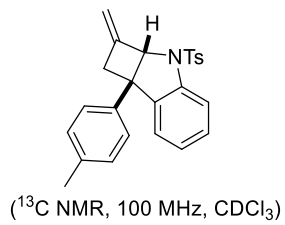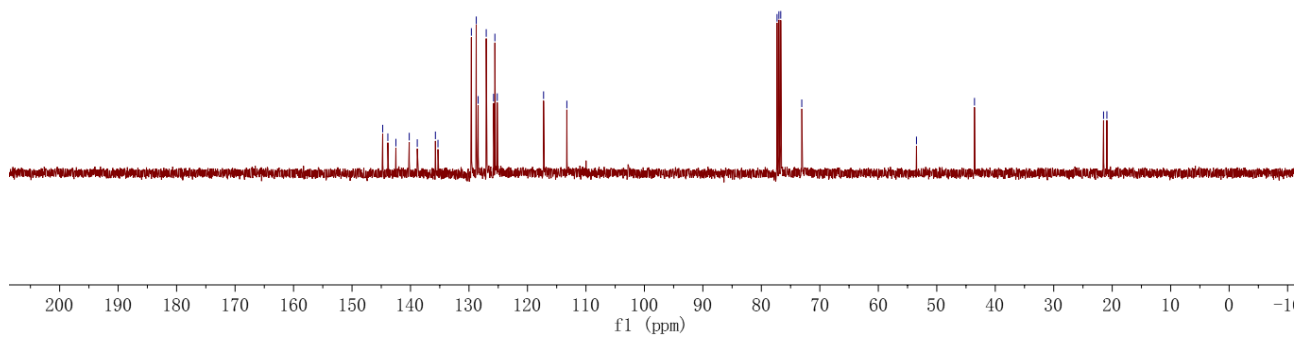

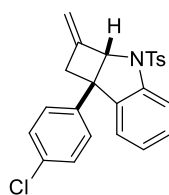

**7b-(4-chlorophenyl)-2-methylene-3-tosyl-2,2a,3,7b-tetrahydro-1H-cyclobuta[b]indole (2ac):**

Yield: 60 mg, 71%, white solid, m.p. 129-131 °C; Eluent: PE/EA = 30/1. <sup>1</sup>H NMR (400 MHz, CDCl<sub>3</sub>, TMS) δ 7.81 (d, *J* = 8.0 Hz, 1H), 7.47 (d, *J* = 8.0 Hz, 2H), 7.31 (m, 1H), 7.10 (td, *J*<sub>1</sub> = 7.6 Hz, *J*<sub>2</sub> = 1.2 Hz, 1H), 7.07 – 6.93 (m, 5H), 6.48 – 6.41 (m, 2H), 5.51 (dd, *J*<sub>1</sub> = 2.8 Hz, *J*<sub>2</sub> = 2.4 Hz, 1H), 5.19 – 5.05 (m, 2H), 3.42 (dt, *J*<sub>1</sub> = 16.0 Hz, *J*<sub>2</sub> = 2.8 Hz, 1H), 3.01 (dq, *J*<sub>1</sub> = 16.0 Hz, *J*<sub>2</sub> = 2.4 Hz, 1H), 2.35 (s, 3H); <sup>13</sup>C{<sup>1</sup>H}-NMR (100 MHz, CDCl<sub>3</sub>, TMS) δ 144.1, 144.1, 142.7, 141.4, 138.0, 135.0, 131.9, 129.5, 128.7, 128.1, 127.1, 126.9, 125.8, 125.4, 117.8, 113.5, 73.3, 53.3, 43.6, 21.4; IR (neat): ν 3066, 2953, 2917, 1594, 1487, 1350, 1163, 1089, 1070, 933, 820, 742, 658 cm<sup>-1</sup>; HRMS (ESI-TOF) Calcd for C<sub>20</sub>H<sub>19</sub>NO<sub>2</sub>Na [M+Na]<sup>+</sup>: 444.07955, found: 444.07866.

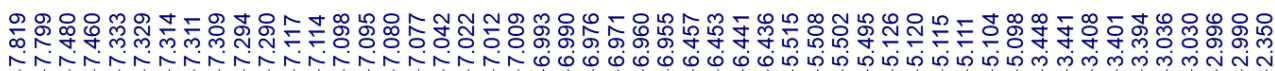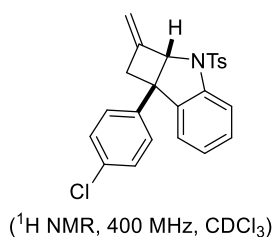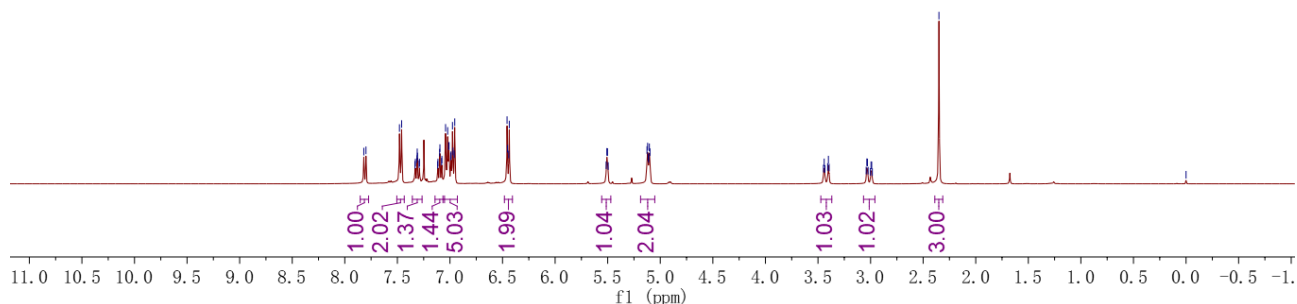

144.147  
144.104  
142.661  
141.405  
138.012  
134.961  
131.908  
129.525  
128.724  
128.115  
127.108  
126.938  
125.838  
125.419  
117.769  
113.500

77.318  
77.000  
76.681  
73.263

-53.250  
-43.556

-21.394

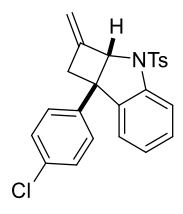

(<sup>13</sup>C NMR, 100 MHz, CDCl<sub>3</sub>)

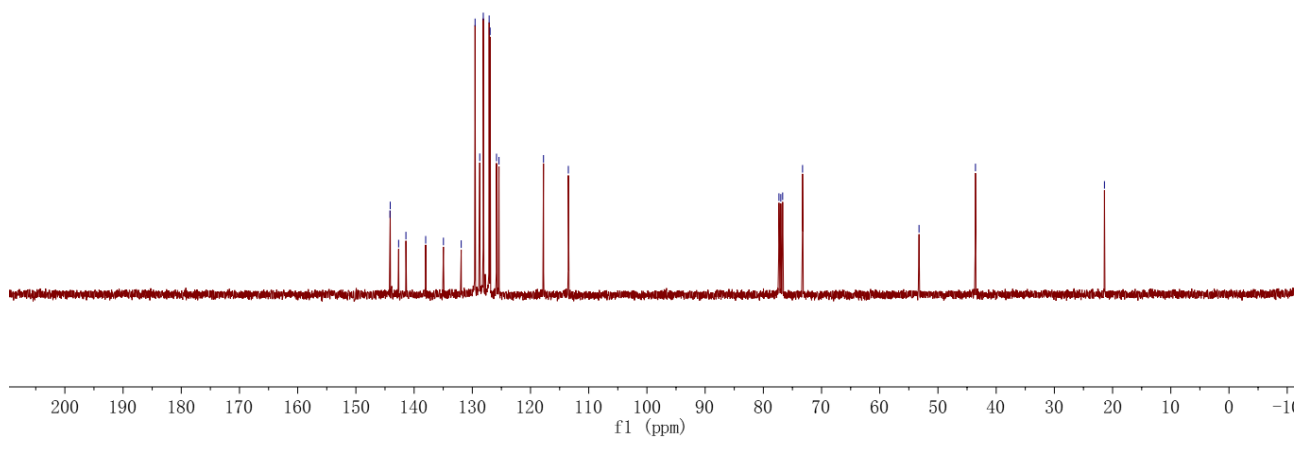

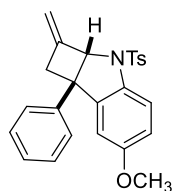

**6-methoxy-2-methylene-7b-phenyl-3-tosyl-2,2a,3,7b-tetrahydro-1H-cyclobuta[b]indole (2ad):**

Yield: 51 mg, 61%, white solid, m.p. 151-153 °C; Eluent: PE/EA = 30/1. <sup>1</sup>H NMR (400 MHz, CDCl<sub>3</sub>, TMS) δ 7.73 (d, *J* = 8.8 Hz, 1H), 7.46 (d, *J* = 8.0 Hz, 2H), 7.11 – 6.95 (m, 5H), 6.85 (dd, *J*<sub>1</sub> = 8.8 Hz, *J*<sub>2</sub> = 2.8 Hz, 1H), 6.54 (d, *J* = 2.8 Hz, 1H), 6.48 (d, *J* = 7.2 Hz, 2H), 5.51 (dd, *J*<sub>1</sub> = 2.8 Hz, *J*<sub>2</sub> = 2.4 Hz, 1H), 5.16 – 5.12 (m, 1H), 5.12 – 5.08 (m, 1H), 3.72 (s, 3H), 3.46 (dt, *J*<sub>1</sub> = 16.0 Hz, *J*<sub>2</sub> = 2.8 Hz, 1H), 3.02 (dq, *J*<sub>1</sub> = 16.0 Hz, *J*<sub>2</sub> = 2.4 Hz, 1H), 2.33 (s, 3H); <sup>13</sup>C{<sup>1</sup>H}-NMR (100 MHz, CDCl<sub>3</sub>, TMS) δ 157.7, 144.6, 143.7, 142.6, 140.1, 136.1, 134.8, 129.6, 128.1, 127.1, 126.0, 125.7, 118.7, 114.1, 113.2, 111.1, 73.7, 55.5, 54.2, 43.7, 21.4; IR (neat): ν 3050, 2956, 2917, 1597, 1482, 1351, 1210, 1165, 1077, 1027, 902, 812, 699 cm<sup>-1</sup>; HRMS (ESI-TOF) Calcd for C<sub>20</sub>H<sub>19</sub>NO<sub>2</sub>Na [M+Na]<sup>+</sup>: 440.12909, found: 440.12864.

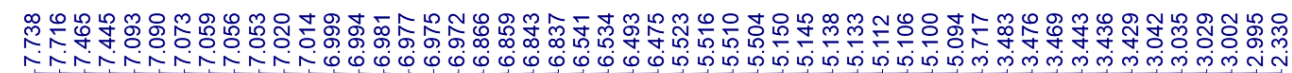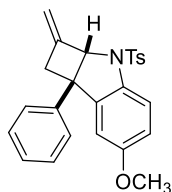

(<sup>1</sup>H NMR, 400 MHz, CDCl<sub>3</sub>)

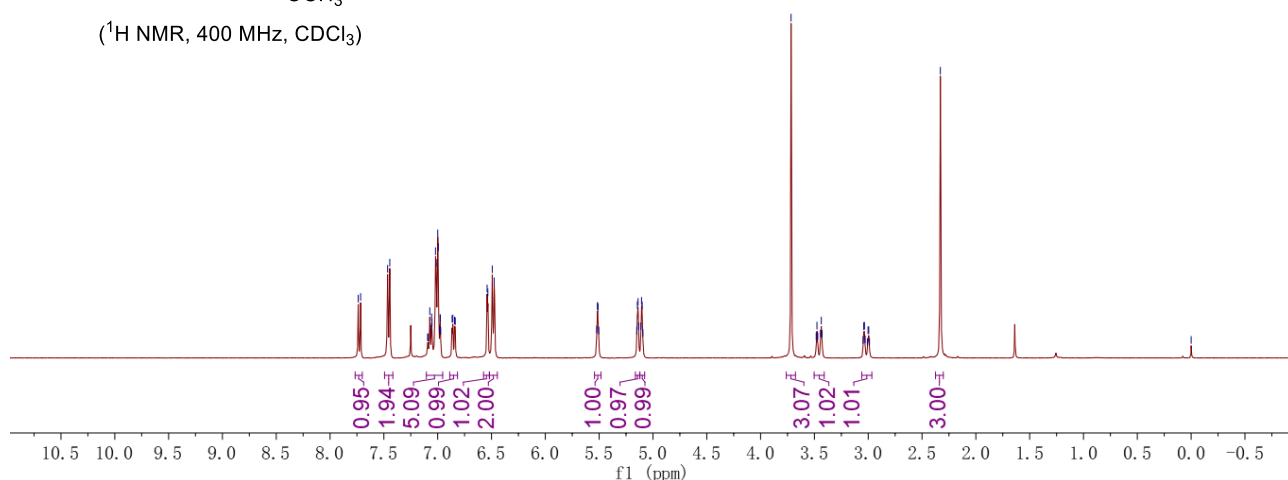

157.686  
144.629  
143.736  
142.586  
140.105  
136.079  
134.791  
129.562  
128.060  
127.130  
126.019  
125.676  
118.704  
114.122  
113.227  
111.076  
77.318  
77.001  
76.682  
73.704  
55.512  
54.170  
43.669  
-21.446

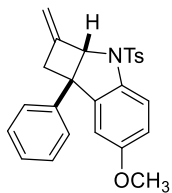

(<sup>13</sup>C NMR, 100 MHz, CDCl<sub>3</sub>)

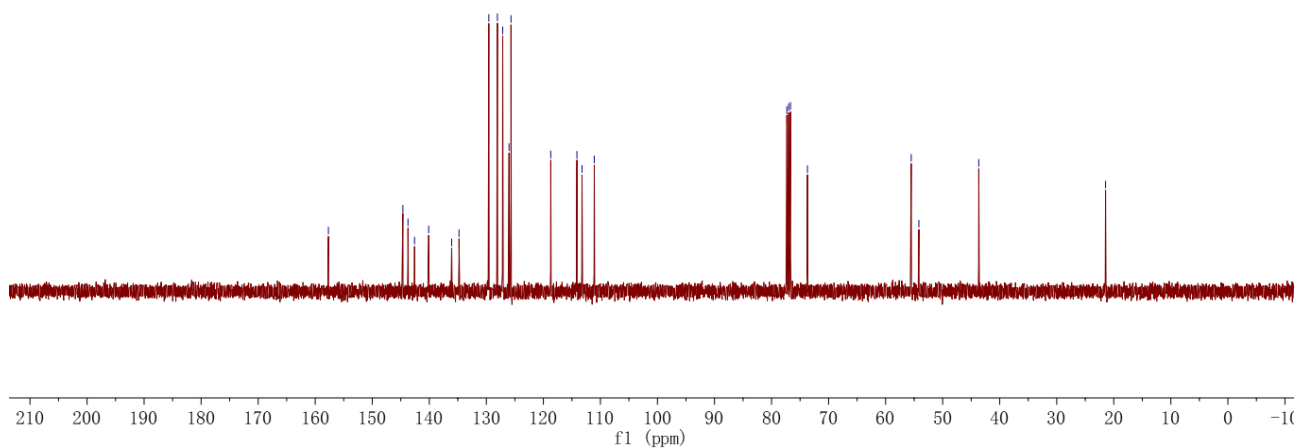



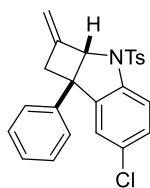

**6-chloro-2-methylene-7b-phenyl-3-tosyl-2,2a,3,7b-tetrahydro-1H-cyclobuta[b]indole (2ae):**

Yield: 66 mg, 78%, white solid, m.p. 152-154 °C; Eluent: PE/EA = 30/1. <sup>1</sup>H NMR (400 MHz, CDCl<sub>3</sub>, TMS) δ 7.74 (dd, *J*<sub>1</sub> = 8.8 Hz, *J*<sub>2</sub> = 1.2 Hz, 1H), 7.55 (d, *J* = 8.0 Hz, 2H), 7.24 (m, 2H), 7.15 – 7.05 (m, 3H), 7.02 (td, *J*<sub>1</sub> = 8.0 Hz, *J*<sub>2</sub> = 1.2 Hz, 2H), 6.93 (d, *J* = 2.0 Hz, 1H), 6.43 (d, *J* = 8.4 Hz, 2H), 5.51 (dd, *J*<sub>1</sub> = 2.8 Hz, *J*<sub>2</sub> = 2.4 Hz, 1H), 5.17 (m, 1H), 5.12 (m, 1H), 3.48 (dt, *J*<sub>1</sub> = 16.0 Hz, *J*<sub>2</sub> = 2.8 Hz, 1H), 3.05 (dq, *J*<sub>1</sub> = 16.0 Hz, *J*<sub>2</sub> = 2.4 Hz, 1H), 2.37 (s, 3H); <sup>13</sup>C{<sup>1</sup>H}-NMR (100 MHz, CDCl<sub>3</sub>, TMS) δ 144.2, 144.1, 142.3, 141.2, 140.5, 134.9, 130.2, 129.8, 128.7, 128.2, 127.0, 126.4, 125.9, 125.5, 118.2, 113.6, 73.3, 53.8, 43.4, 21.5; IR (neat): ν 3058, 2969, 2922, 1597, 1463, 1354, 1164, 1090, 897, 697 cm<sup>-1</sup>; HRMS (ESI-TOF) Calcd for C<sub>20</sub>H<sub>19</sub>NO<sub>2</sub>Na [M+Na]<sup>+</sup>: 444.07955, found: 444.07914.

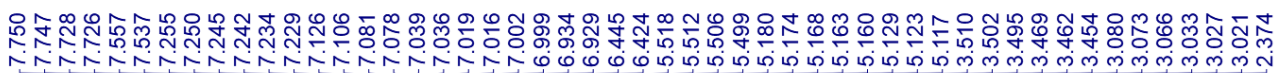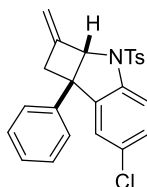

(<sup>1</sup>H NMR, 400 MHz, CDCl<sub>3</sub>)

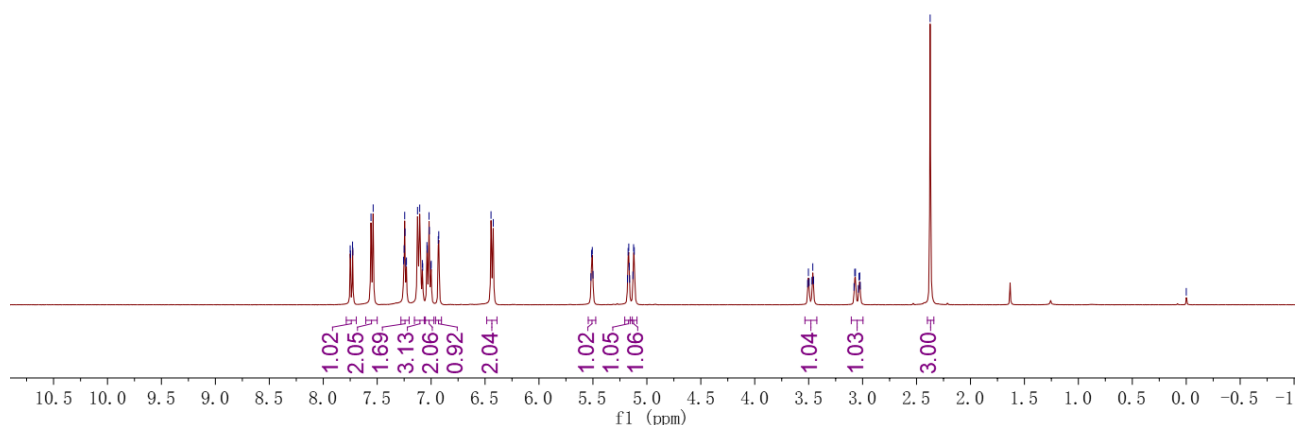

144.204  
144.071  
142.298  
141.177  
140.527  
134.946  
130.197  
129.803  
128.682  
128.233  
127.035  
126.411  
125.931  
125.512  
118.207  
113.645

77.319  
77.001  
76.683  
73.277

-53.757

-43.378

-21.480

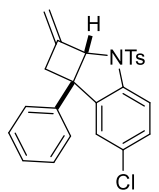

(<sup>13</sup>C NMR, 100 MHz, CDCl<sub>3</sub>)

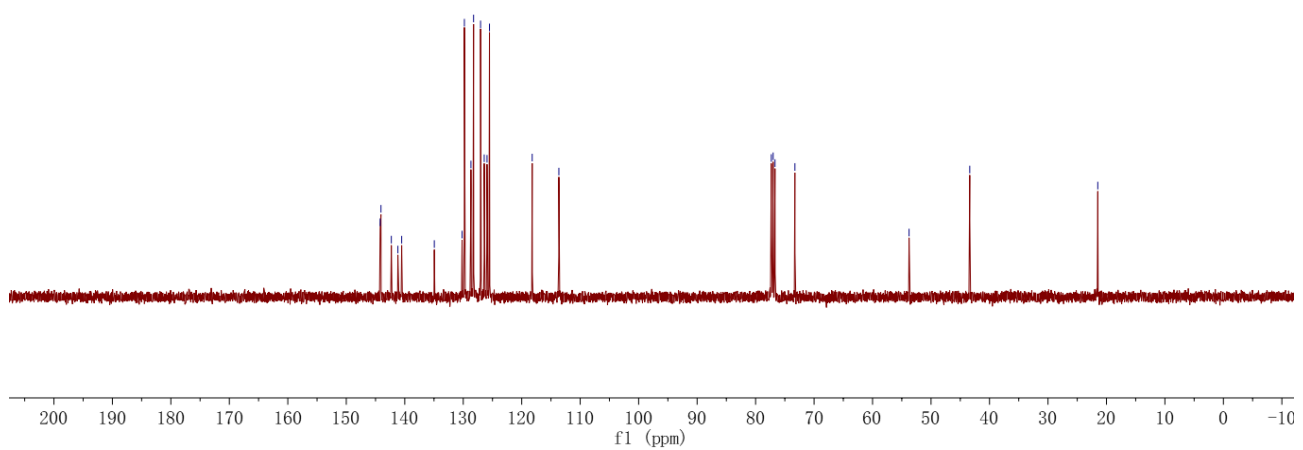

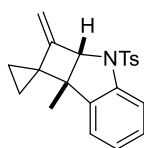

**7b-methyl-2-methylene-3-tosyl-2,2a,3,7b-tetrahydrospiro[cyclobuta[b]indole-1,1'-cyclopropane] (2af):** Yield: 37 mg, 53%, white solid, m.p. 140-142 °C; Eluent: PE/EA = 30/1.  $^1\text{H}$  NMR (400 MHz,  $\text{CDCl}_3$ , TMS)  $\delta$  7.70 (d,  $J = 8.2$  Hz, 1H), 7.55 (d,  $J = 8.2$  Hz, 2H), 7.25 (t,  $J = 7.8$  Hz, 1H), 7.16 (d,  $J = 8.0$  Hz, 2H), 7.06 (t,  $J = 7.2$  Hz, 1H), 6.82 (d,  $J = 7.5$  Hz, 1H), 5.21 (s, 1H), 4.88 (s, 1H), 4.66 (s, 1H), 2.33 (s, 3H), 1.04 – 0.96 (m, 1H), 0.79 (s, 3H), 0.76 – 0.71 (m, 1H), 0.68 – 0.59 (m, 2H);  $^{13}\text{C}\{^1\text{H}\}$ -NMR (100 MHz,  $\text{CDCl}_3$ , TMS)  $\delta$  154.4, 143.9, 142.4, 138.8, 135.0, 129.4, 128.1, 127.1, 124.9, 123.8, 117.6, 105.0, 69.9, 50.3, 37.4, 21.5, 20.2, 14.9, 12.2.; IR (neat):  $\nu$  3034, 2956, 2912, 1675, 1599, 1469, 1349, 1163, 1074, 896, 754, 659  $\text{cm}^{-1}$ ; HRMS (ESI-TOF) Calcd for  $\text{C}_{20}\text{H}_{19}\text{NO}_2\text{Na}$   $[\text{M}+\text{Na}]^+$ : 374.11852, found: 374.11936.

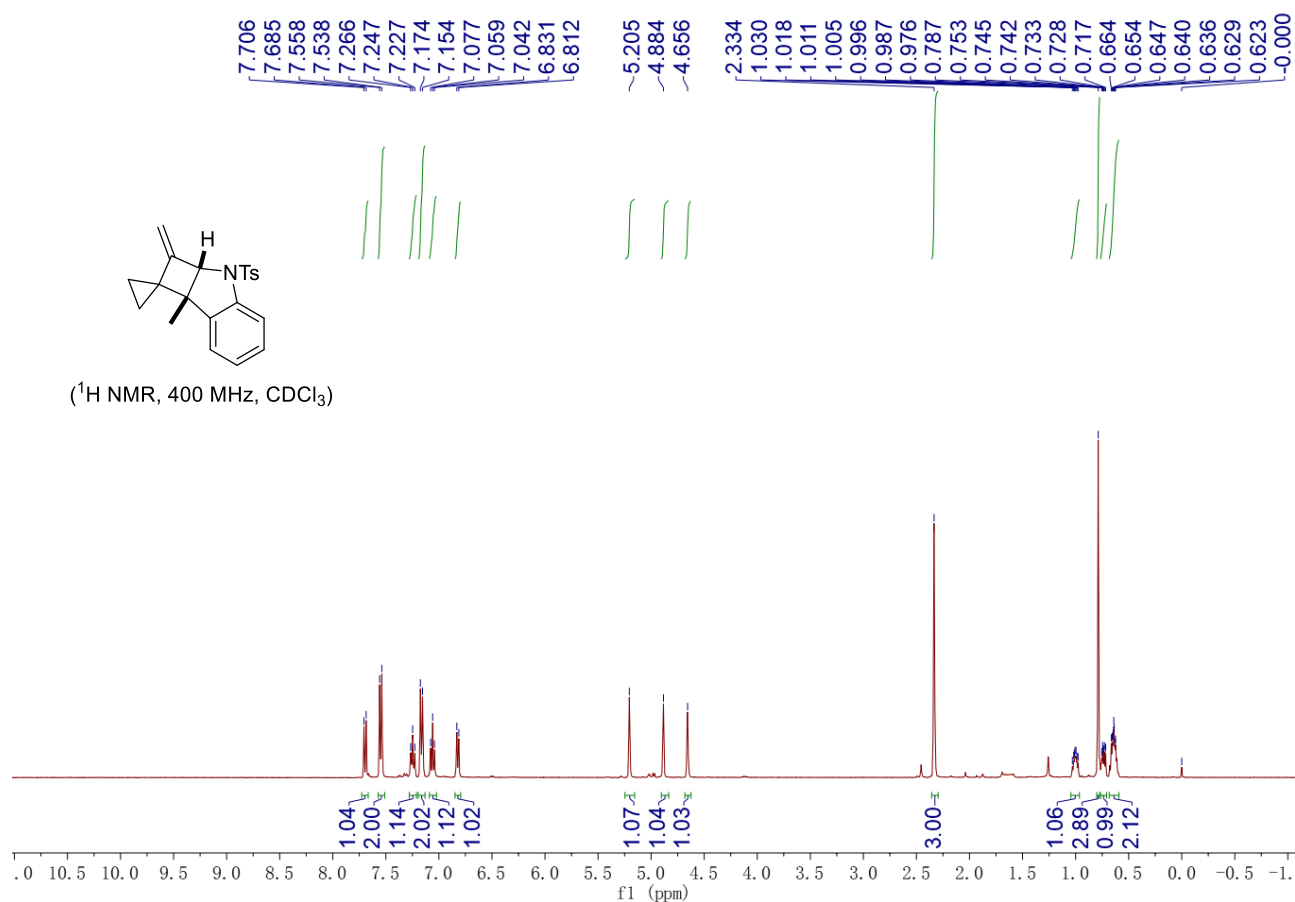

154.363  
143.892  
142.376  
138.782  
135.017  
129.445  
128.080  
127.140  
124.851  
123.807  
117.572  
104.965

77.325  
77.000  
76.683  
69.854

50.277

37.361

21.483  
20.165  
14.891  
12.204

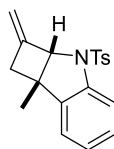

(<sup>13</sup>C NMR, 100 MHz, CDCl<sub>3</sub>)

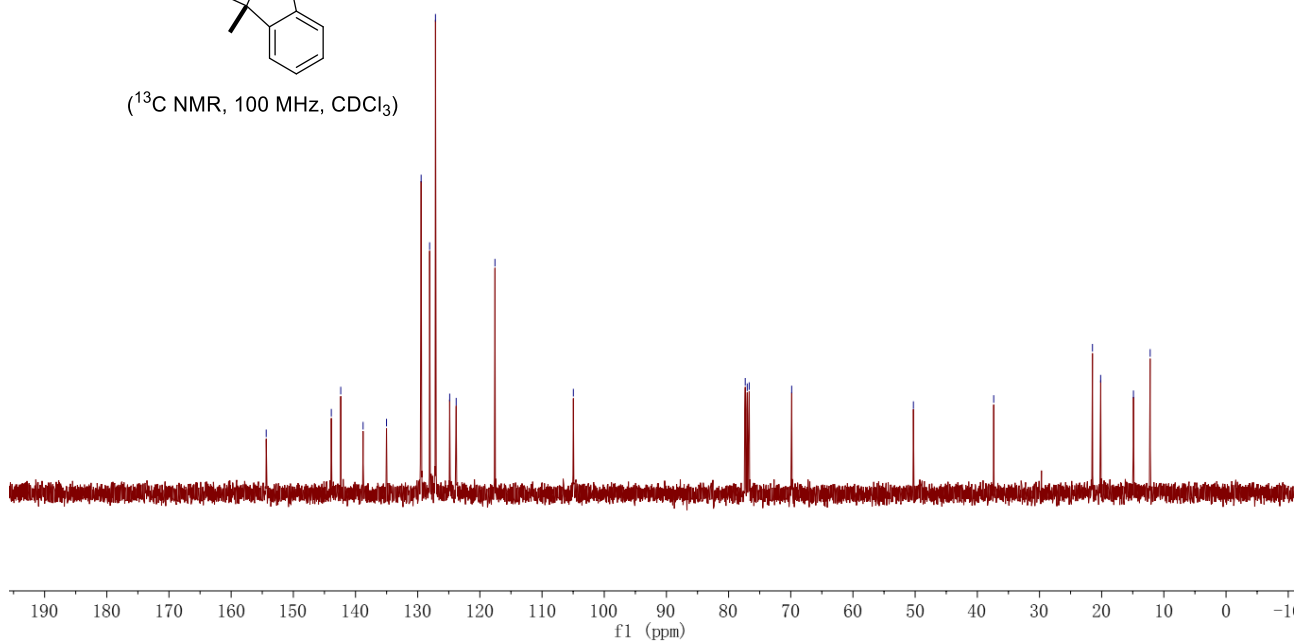

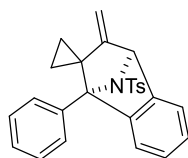

***N*,4-dimethyl-*N*-(3'-methylene-1'-phenyl-3',4'-dihydro-1'*H*-spiro[cyclopropane-1,2'-naphthalen]-1'-yl)benzenesulfonamide (3a):** Yield: 21 mg, 25%, white solid, m.p. >200 °C; Eluent: PE/EA = 30/1. <sup>1</sup>H NMR (400 MHz, CDCl<sub>3</sub>, TMS) δ 7.63 (d, *J* = 8.0 Hz, 2H), 7.36 – 7.24 (m, 4H), 7.17 (d, *J* = 7.2 Hz, 1H), 7.10 (td, *J*<sub>1</sub> = 7.2 Hz, *J*<sub>2</sub> = 1.2 Hz, 1H), 7.07 – 6.99 (m, 1H), 6.98 (d, *J* = 8.0 Hz, 2H), 6.85 (d, *J* = 8.0 Hz, 2H), 5.75 (s, 1H), 4.96 (s, 1H), 4.26 (s, 1H), 2.26 (s, 3H), 1.16 – 1.05 (m, 1H), 0.98 – 0.84 (m, 1H), 0.45 – 0.33 (m, 1H), 0.33 – 0.23 (m, 1H); <sup>13</sup>C{<sup>1</sup>H}-NMR (100 MHz, CDCl<sub>3</sub>, TMS) δ 151.8, 146.2, 143.0, 142.6, 136.7, 132.0, 130.2, 128.4, 128.3, 128.2, 127.3, 126.8, 126.6, 121.4, 120.6, 97.8, 79.3, 70.3, 36.4, 21.4, 16.9, 13.5; IR (neat): ν 3042, 2917, 2841, 1591, 1461, 1341, 1157, 1083, 1023, 983, 867, 678 cm<sup>-1</sup>; HRMS (ESI-TOF) Calcd for C<sub>20</sub>H<sub>19</sub>NO<sub>2</sub>Na [M+Na]<sup>+</sup>: 436.13417, found: 436.13421.

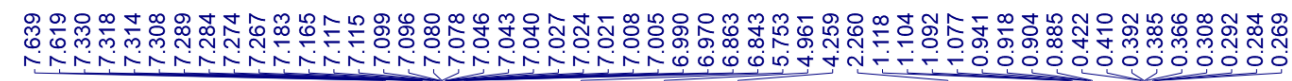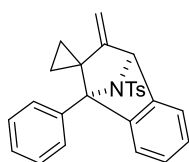

(<sup>1</sup>H NMR, 400 MHz, CDCl<sub>3</sub>)

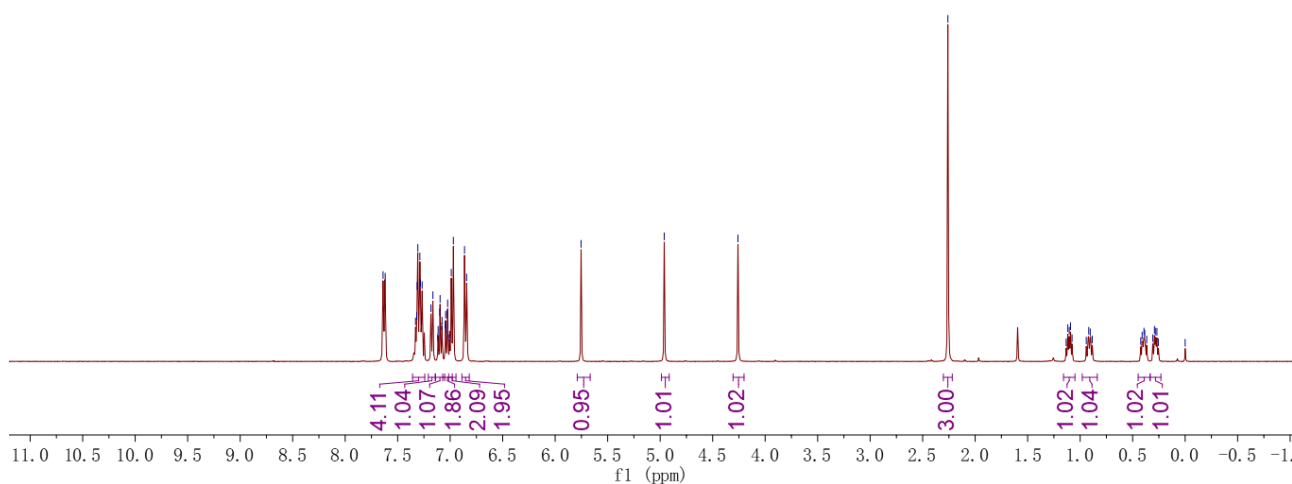

151.774  
 146.206  
 142.958  
 142.632  
 136.692  
 131.964  
 130.186  
 128.424  
 128.267  
 128.177  
 127.270  
 126.771  
 126.633  
 121.383  
 120.615  
 -97.829  
 79.325  
 77.318  
 77.001  
 76.682  
 70.337  
 -36.403  
 -21.351  
 -16.889  
 -13.508

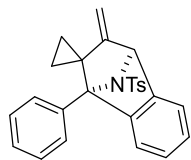

(<sup>13</sup>C NMR, 100 MHz, CDCl<sub>3</sub>)

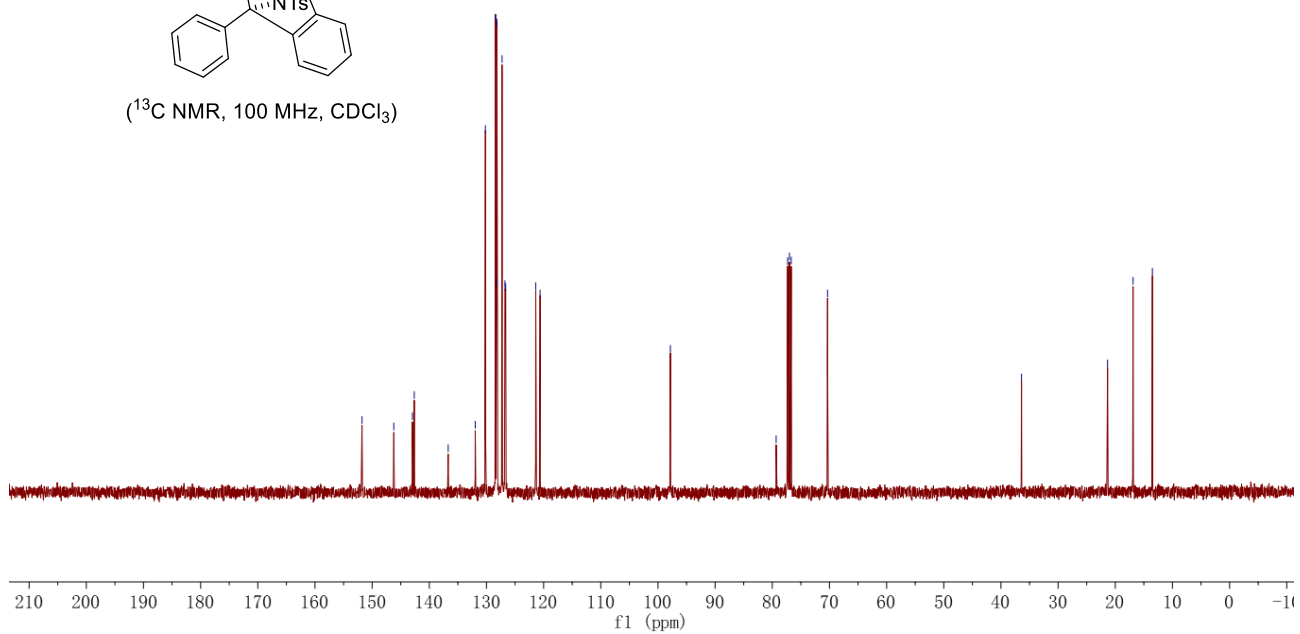

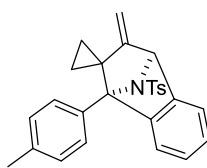

***N*,4-dimethyl-*N*-(3'-methylene-1'-(*p*-tolyl)-3',4'-dihydro-1'*H*-spiro[cyclopropane-1,2'-naphthalen]-1'-yl)benzenesulfonamide (3b):** Yield: 21 mg, 24%, white solid, m.p. 195-197 °C; Eluent: PE/EA = 30/1. <sup>1</sup>H NMR (400 MHz, CDCl<sub>3</sub>, TMS) δ 7.52 (d, *J* = 8.4 Hz, 2H), 7.26 (d, *J* = 7.6 Hz, 1H), 7.18 (d, *J* = 7.6 Hz, 1H), 7.13 – 7.04 (m, 3H), 7.03 (dd, *J*<sub>1</sub> = 7.6 Hz, *J*<sub>2</sub> = 1.2 Hz, 2H), 6.99 (d, *J* = 8.4 Hz, 3H), 6.85 (d, *J* = 8.0 Hz, 2H), 5.74 (s, 1H), 4.95 (s, 1H), 4.25 (s, 1H), 2.37 (s, 3H), 2.27 (s, 3H), 1.18 – 1.07 (m, 1H), 0.97 – 0.86 (m, 1H), 0.42 – 0.31 (m, 1H), 0.31 – 0.21 (m, 1H); <sup>13</sup>C{<sup>1</sup>H}-NMR (100 MHz, CDCl<sub>3</sub>, TMS) δ 151.8, 146.2, 143.0, 142.6, 138.1, 136.6, 130.2, 128.7, 128.3, 128.2, 127.9, 126.7, 126.6, 121.4, 120.6, 97.8, 79.2, 70.2, 36.3, 21.4, 21.2, 16.9, 13.5; IR (neat): ν 3060, 2995, 2922, 1599, 1453, 1342, 1089, 1022, 986, 878, 735, 690 cm<sup>-1</sup>; HRMS (ESI-TOF) Calcd for C<sub>20</sub>H<sub>19</sub>NO<sub>2</sub>Na [M+Na]<sup>+</sup>: 450.14982, found: 450.14883.

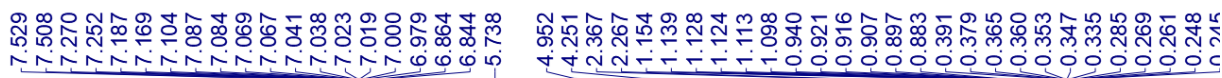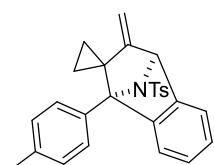

(<sup>1</sup>H NMR, 400 MHz, CDCl<sub>3</sub>)

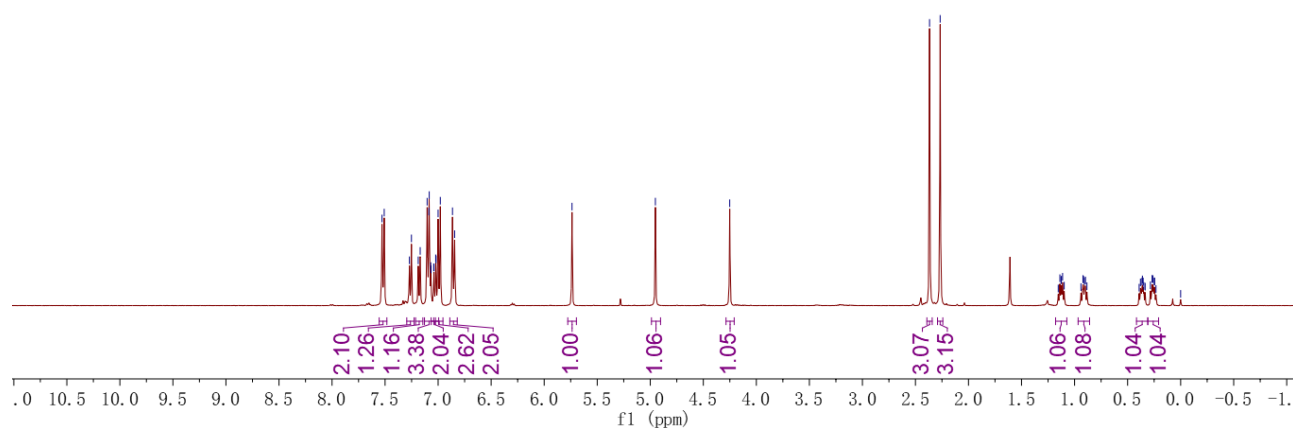

151.821  
146.169  
142.968  
142.575  
138.077  
136.587  
130.192  
128.660  
128.337  
128.242  
127.946  
126.705  
126.603  
121.444  
120.600  
-97.791  
79.208  
77.317  
76.999  
76.681  
70.204  
-36.331  
21.365  
21.175  
16.926  
13.524

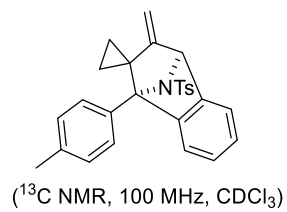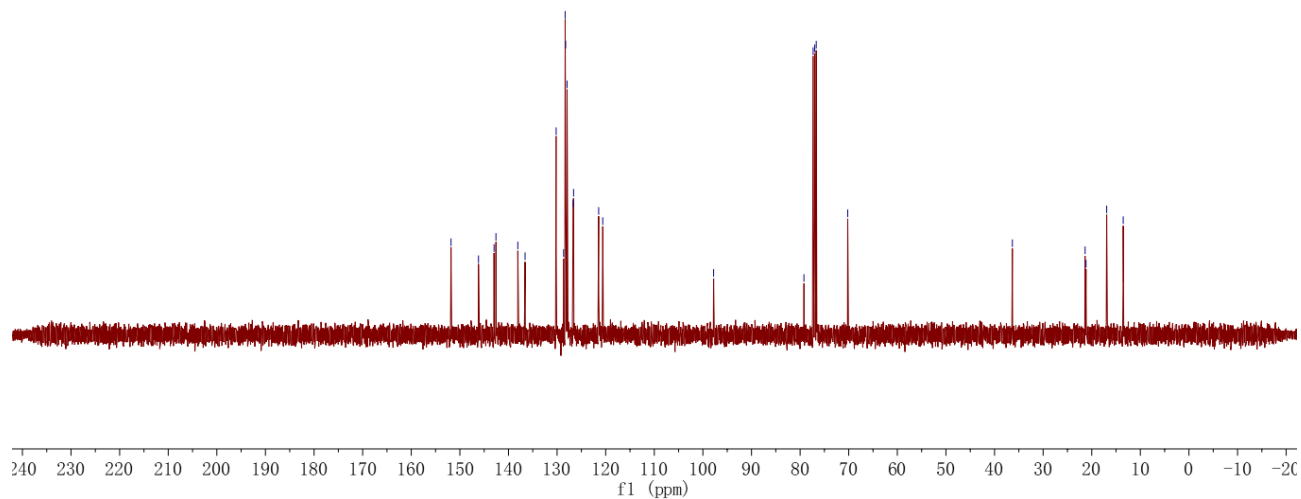



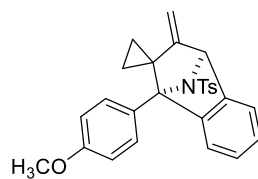

***N*-(1'-(4-methoxyphenyl)-3'-methylene-3',4'-dihydro-1'*H*-spiro[cyclopropane-1,2'-naphthalen]-1'-yl)-*N*,4-dimethylbenzenesulfonamide (3c):** Yield: 17 mg, 19%, white solid, m.p. 191-193 °C; Eluent: PE/EA = 30/1. <sup>1</sup>H NMR (400 MHz, CDCl<sub>3</sub>, TMS) δ 7.57 (d, *J* = 8.8 Hz, 2H), 7.28 (d, *J* = 7.6 Hz, 1H), 7.18 (d, *J* = 7.6 Hz, 1H), 7.13 – 6.93 (m, 4H), 6.84 (m, 4H), 5.75 (s, 1H), 4.96 (s, 1H), 4.26 (s, 1H), 3.84 (s, 3H), 2.27 (s, 3H), 1.17 – 1.01 (m, 1H), 0.97 – 0.81 (m, 1H), 0.40 – 0.14 (m, 2H); <sup>13</sup>C{<sup>1</sup>H}-NMR (100 MHz, CDCl<sub>3</sub>, TMS) δ 151.8, 146.2, 143.0, 142.6, 138.1, 136.6, 130.2, 128.7, 128.3, 128.2, 127.9, 126.7, 126.6, 121.4, 120.6, 97.8, 79.2, 70.2, 36.3, 21.4, 21.2, 16.9, 13.5; IR (neat): ν 2990, 2930, 2841, 1589, 1510, 1458, 1343, 1302, 1249, 1100, 1089, 833, 754, 651 cm<sup>-1</sup>; HRMS (ESI-TOF) Calcd for C<sub>20</sub>H<sub>19</sub>NO<sub>2</sub>Na [M+Na]<sup>+</sup>: 466.14474, found: 466.14511.

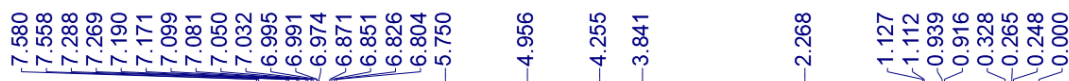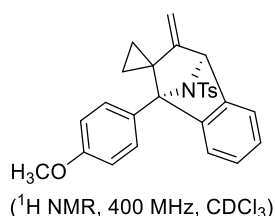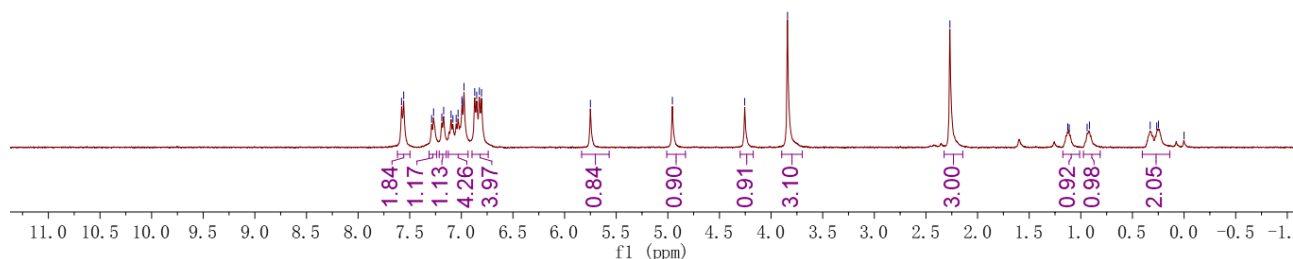

159.343  
151.801  
146.186  
143.017  
142.557  
136.618  
131.764  
128.363  
128.273  
126.728  
126.627  
123.458  
121.443  
120.671  
112.578  
-97.800  
  
79.000  
77.318  
77.000  
76.683  
70.130  
  
-55.159  
  
-36.382  
  
~21.380  
~16.909  
~13.510

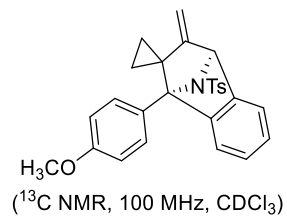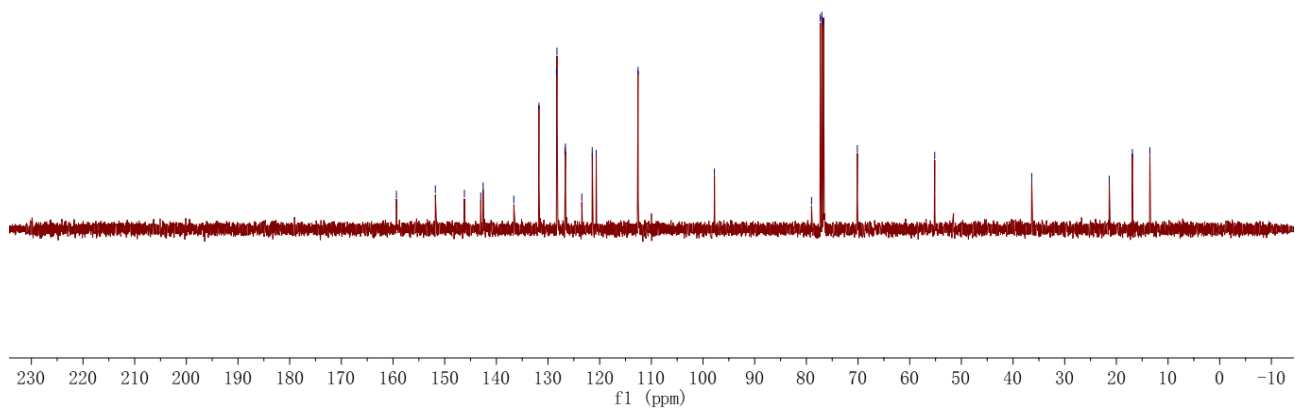

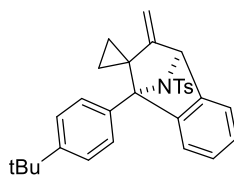

***N*-(1'-(4-(tert-butyl)phenyl)-3'-methylene-3',4'-dihydro-1'*H*-spiro[cyclopropane-1,2'-naphthalen]-1'-yl)-*N*,4-dimethylbenzenesulfonamide (3d):** Yield: 16 mg, 17%, pale yellow oil; Eluent: PE/EA = 30/1.  $^1\text{H}$  NMR (400 MHz,  $\text{CDCl}_3$ , TMS)  $\delta$  7.49 (d,  $J = 8.0$  Hz, 2H), 7.31 (d,  $J = 7.2$  Hz, 1H), 7.26 – 7.18 (m, 4H), 7.16 – 7.04 (m, 2H), 6.98 (d,  $J = 6.8$  Hz, 2H), 6.85 (d,  $J = 7.6$  Hz, 2H), 5.78 (s, 1H), 4.96 (s, 1H), 4.26 (s, 1H), 2.27 (s, 3H), 1.33 (s, 9H), 1.23 – 1.15 (m, 1H), 0.99 – 0.90 (m, 1H), 0.43 – 0.33 (m, 1H), 0.32 – 0.20 (m, 1H);  $^{13}\text{C}\{^1\text{H}\}$ -NMR (100 MHz,  $\text{CDCl}_3$ , TMS)  $\delta$  152.1, 151.0, 146.6, 143.0, 142.4, 137.0, 130.0, 128.4, 128.3, 128.1, 126.7, 126.7, 124.0, 121.5, 120.5, 97.7, 79.1, 70.0, 36.2, 34.5, 31.3, 21.4, 17.1, 13.8; IR (neat):  $\nu$  3050, 2964, 2867, 1597, 1453, 1340, 1089, 913, 811, 732, 667  $\text{cm}^{-1}$ ; HRMS (ESI-TOF) Calcd for  $\text{C}_{20}\text{H}_{19}\text{NO}_2\text{Na}$   $[\text{M}+\text{Na}]^+$ : 492.19677, found: 492.19707.

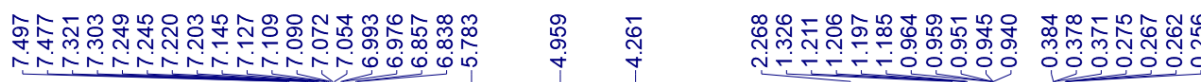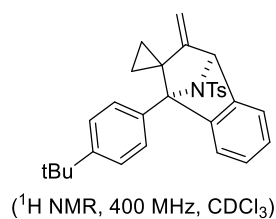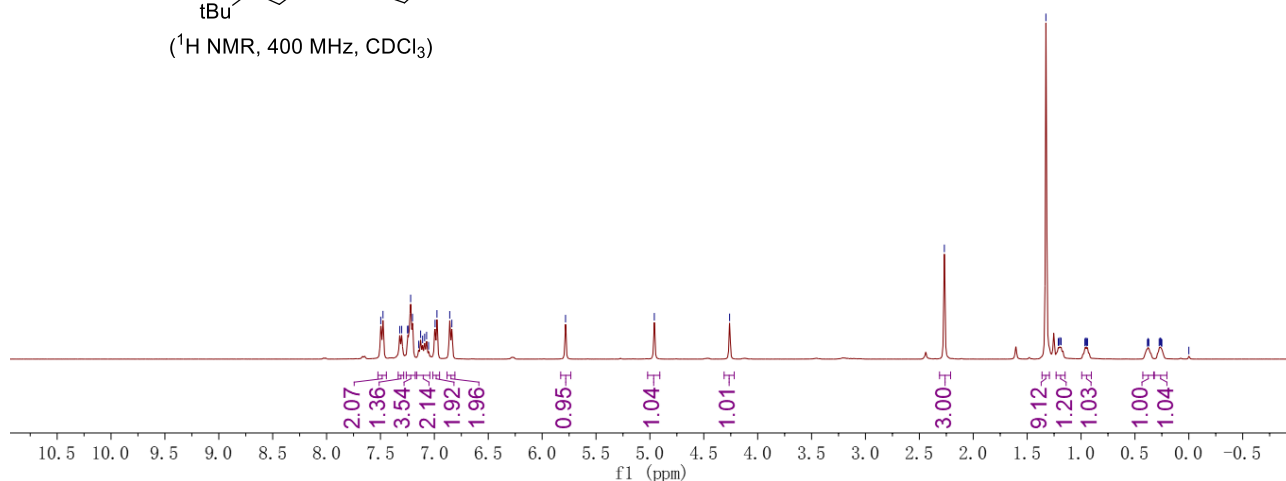

152.079  
 150.977  
 146.608  
 142.981  
 142.428  
 136.954  
 130.035  
 128.393  
 128.329  
 128.139  
 126.717  
 126.664  
 124.037  
 121.485  
 120.523  
 -97.684  
 79.065  
 77.318  
 77.001  
 76.683  
 70.008  
 36.160  
 34.452  
 31.252  
 21.362  
 17.080  
 13.764

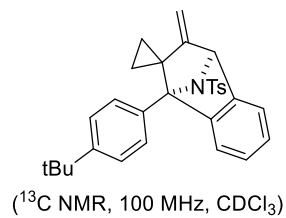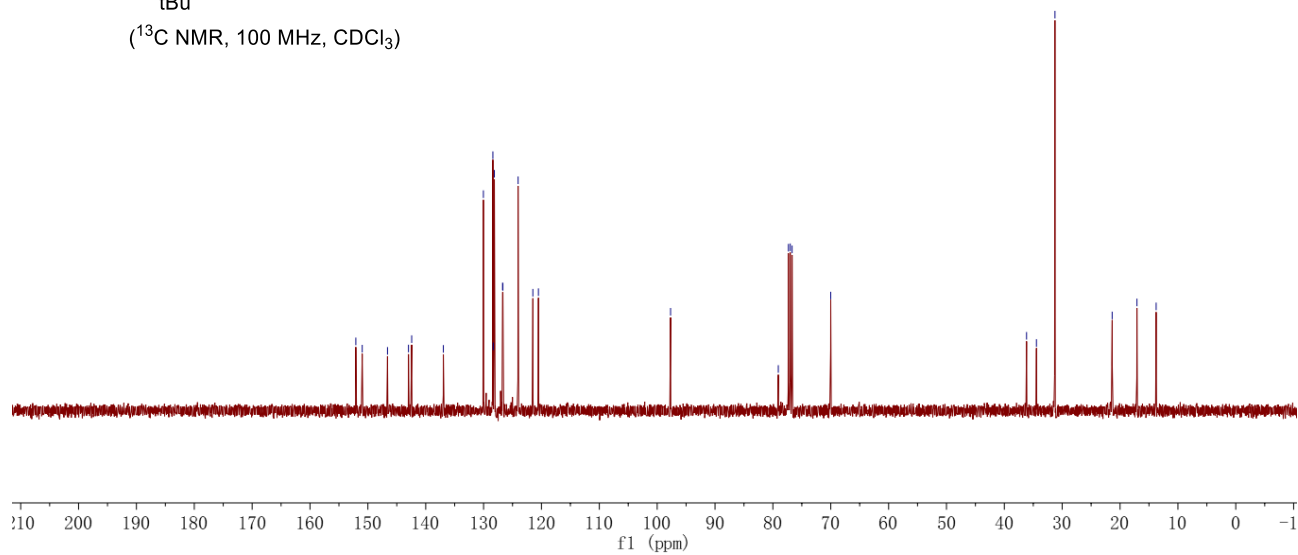

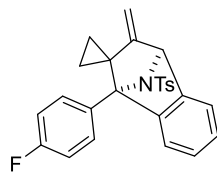

***N*-(1'-(4-fluorophenyl)-3'-methylene-3',4'-dihydro-1'*H*-spiro[cyclopropane-1,2'-naphthalen]-1'-yl)-*N*,4-dimethylbenzenesulfonamide (3e):** Yield: 18 mg, 21%, white solid, m.p. > 200 °C; Eluent: PE/EA = 30/1. <sup>1</sup>H NMR (400 MHz, CDCl<sub>3</sub>, TMS) δ 7.67 – 7.58 (m, 2H), 7.29 (d, *J* = 6.8 Hz, 1H), 7.18 – 7.09 (m, 2H), 7.08 – 7.03 (m, 1H), 7.02 – 6.93 (m, 4H), 6.89 (d, *J* = 8.0 Hz, 2H), 5.75 (s, 1H), 4.97 (s, 1H), 4.27 (s, 1H), 2.28 (s, 3H), 1.14 – 1.04 (m, 1H), 0.98 – 0.90 (m, 1H), 0.39 – 0.24 (m, 2H); <sup>13</sup>C{<sup>1</sup>H}-NMR (100 MHz, CDCl<sub>3</sub>, TMS) δ 162.5 (d, *J* = 247.3 Hz), 151.5, 145.8, 142.9, 142.9, 136.6, 132.3 (d, *J* = 8.2 Hz), 128.5, 128.2, 126.9, 126.8, 121.2, 120.8, 114.1 (d, *J* = 21.3 Hz), 98.0, 78.7, 70.1, 36.4, 21.4, 16.9, 13.5; <sup>19</sup>F NMR (376 MHz, CDCl<sub>3</sub>) δ -112.9; IR (neat): ν 3066, 3026, 2964, 1594, 1506, 1355, 1261, 1088, 965, 836, 829 cm<sup>-1</sup>; HRMS (ESI-TOF) Calcd for C<sub>20</sub>H<sub>19</sub>NO<sub>2</sub>Na [M+Na]<sup>+</sup>: 454.12475, found: 454.12371.

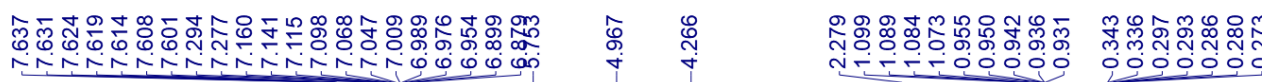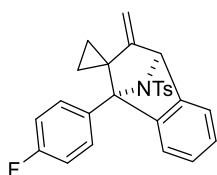

(<sup>1</sup>H NMR, 400 MHz, CDCl<sub>3</sub>)

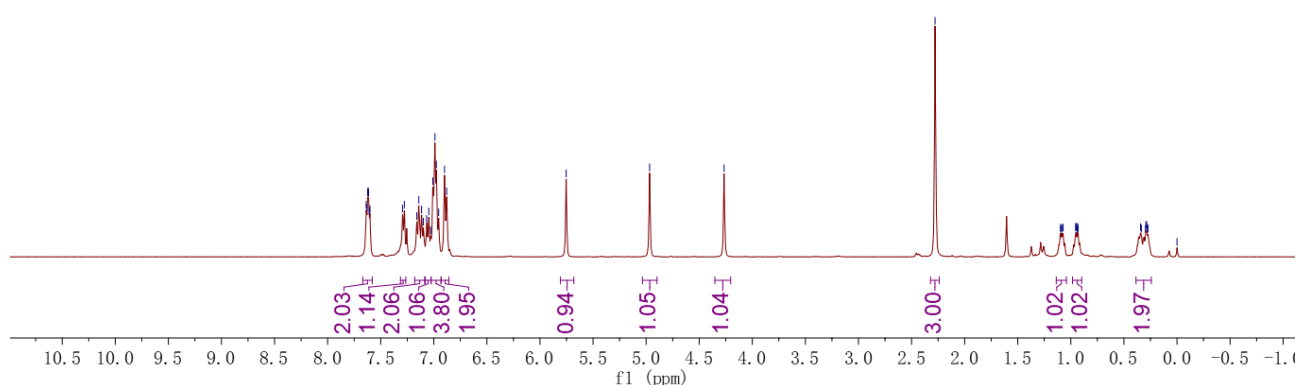

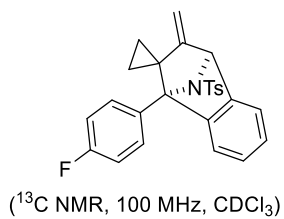

163.678  
 161.205  
 151.475  
 145.847  
 142.936  
 142.889  
 136.585  
 132.278  
 132.196  
 128.504  
 128.154  
 126.929  
 126.751  
 121.228  
 120.760  
 114.355  
 114.142  
 -98.043  
  
 78.705  
 77.319  
 77.000  
 76.683  
 70.148  
  
 -36.386  
  
 ~21.363  
 ~16.875  
 ~13.496

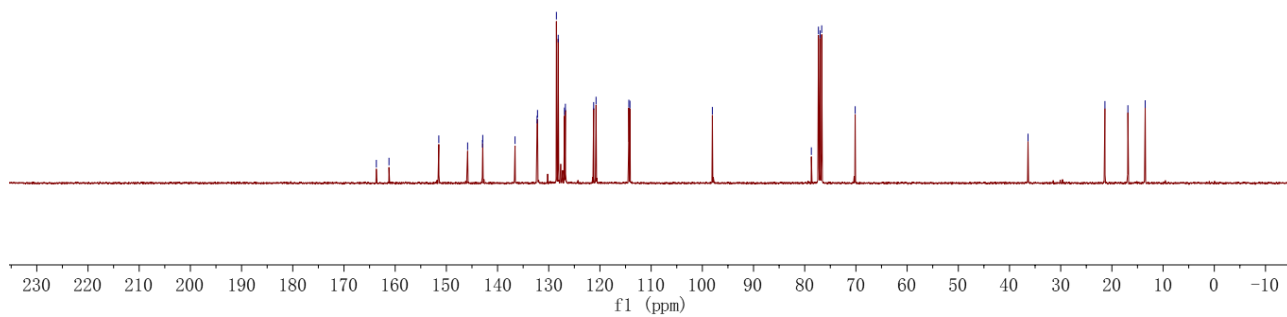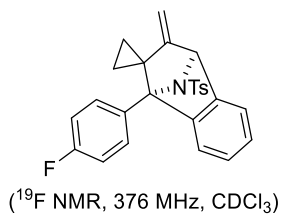

--112.934

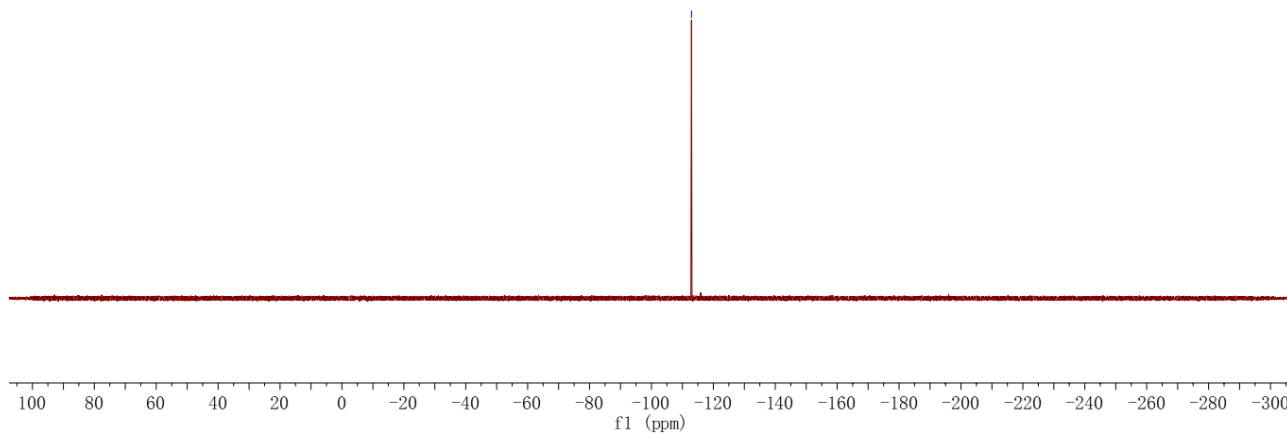

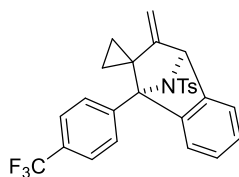

***N*,4-dimethyl-*N*-(3'-methylene-1'-(4-(trifluoromethyl)phenyl)-3',4'-dihydro-1'*H*-spiro[cyclopropane-1,2'-naphthalen]-1'-yl)benzenesulfonamide (3f)**: Yield: 18 mg, 19%, white solid, m.p. 160-162 °C; Eluent: PE/EA = 30/1. <sup>1</sup>H NMR (400 MHz, CDCl<sub>3</sub>, TMS) δ 7.72 (d, *J* = 8.4 Hz, 2H), 7.50 (d, *J* = 8.4 Hz, 2H), 7.31 (d, *J* = 6.4 Hz, 1H), 7.20 – 7.09 (m, 3H), 7.03 (d, *J* = 8.4 Hz, 2H), 6.90 (d, *J* = 8.0 Hz, 2H), 5.78 (s, 1H), 4.99 (s, 1H), 4.29 (s, 1H), 2.28 (s, 3H), 1.15 – 1.05 (m, 1H), 1.02 – 0.94 (m, 1H), 0.44 – 0.28 (m, 2H); <sup>13</sup>C{<sup>1</sup>H}-NMR (100 MHz, CDCl<sub>3</sub>, TMS) δ 151.3, 145.6, 143.1, 142.8, 136.6, 136.1, 130.6, 130.2 (q, *J* = 32.2 Hz), 128.7, 128.0, 127.1, 126.9, 124.1 (q, *J* = 2.9 Hz), 123.8 (q, *J* = 270.5 Hz), 121.1, 120.8, 98.3, 98.2, 78.7, 70.1, 36.3, 21.3, 17.0, 13.7; <sup>19</sup>F NMR (376 MHz, CDCl<sub>3</sub>) δ -62.5; IR (neat): ν 3073, 2919, 1670, 1597, 1456, 1329, 1156, 1113, 881, 681 cm<sup>-1</sup>; HRMS (ESI-TOF) Calcd for C<sub>20</sub>H<sub>19</sub>NO<sub>2</sub>Na [M+Na]<sup>+</sup>: 504.12156, found: 504.12118.

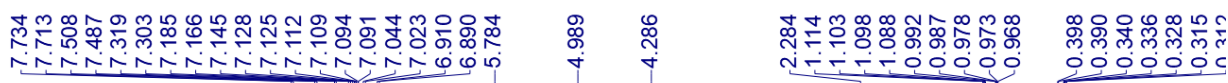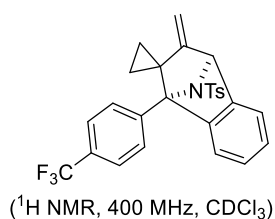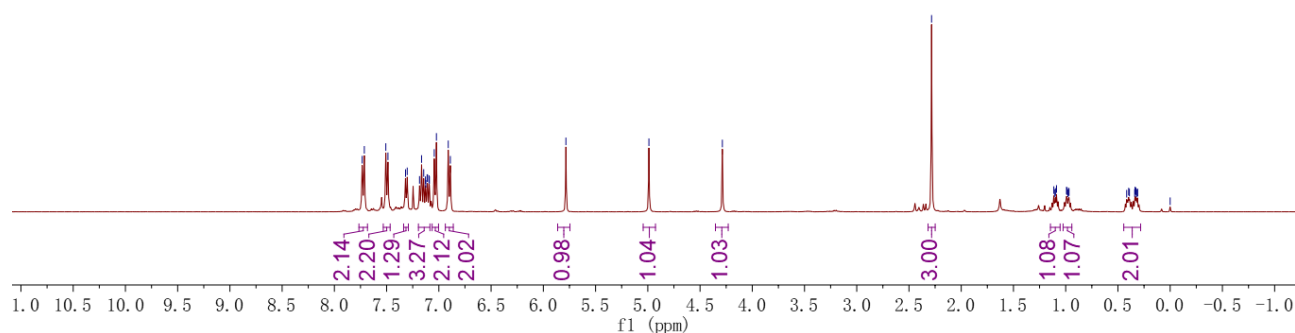

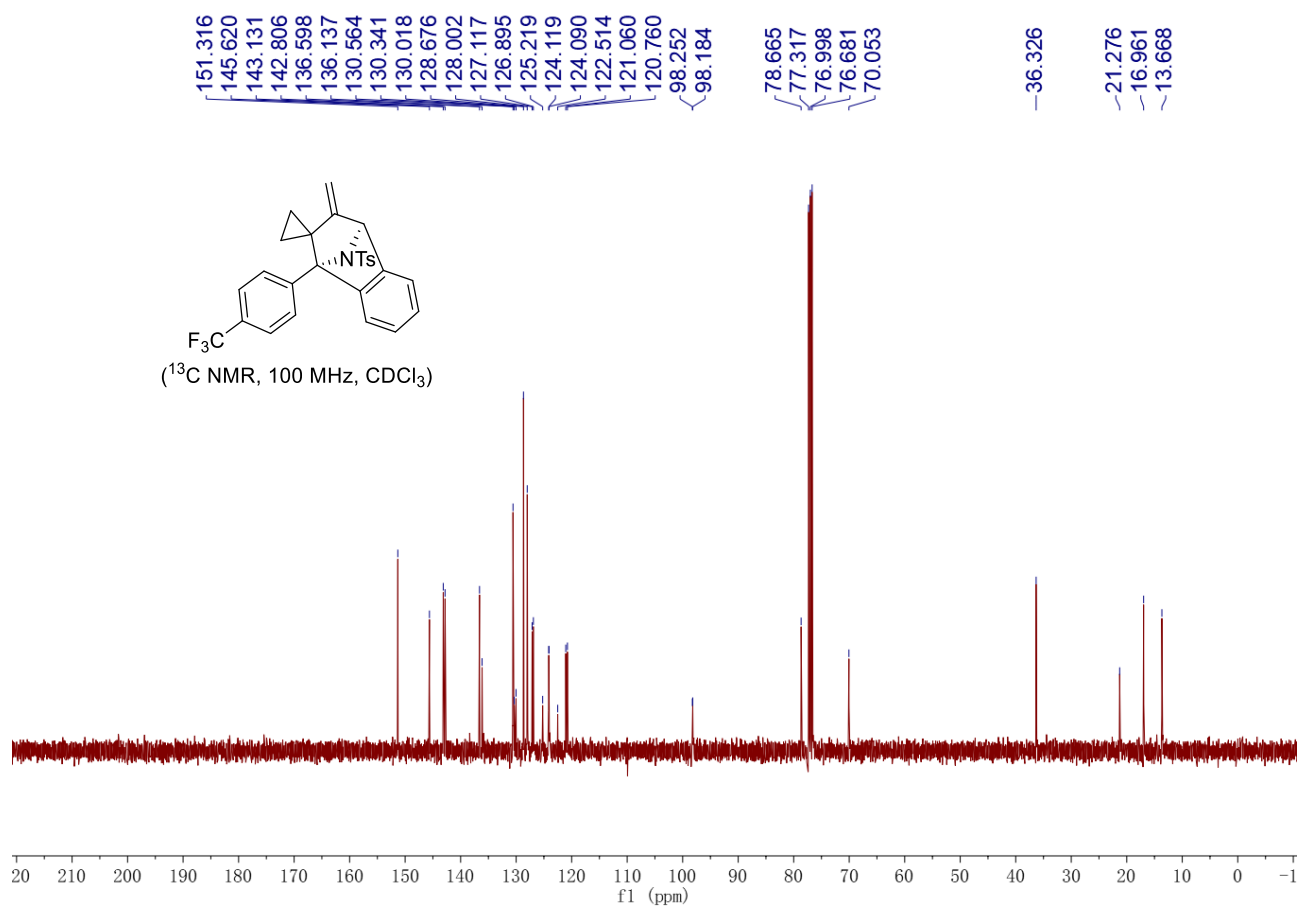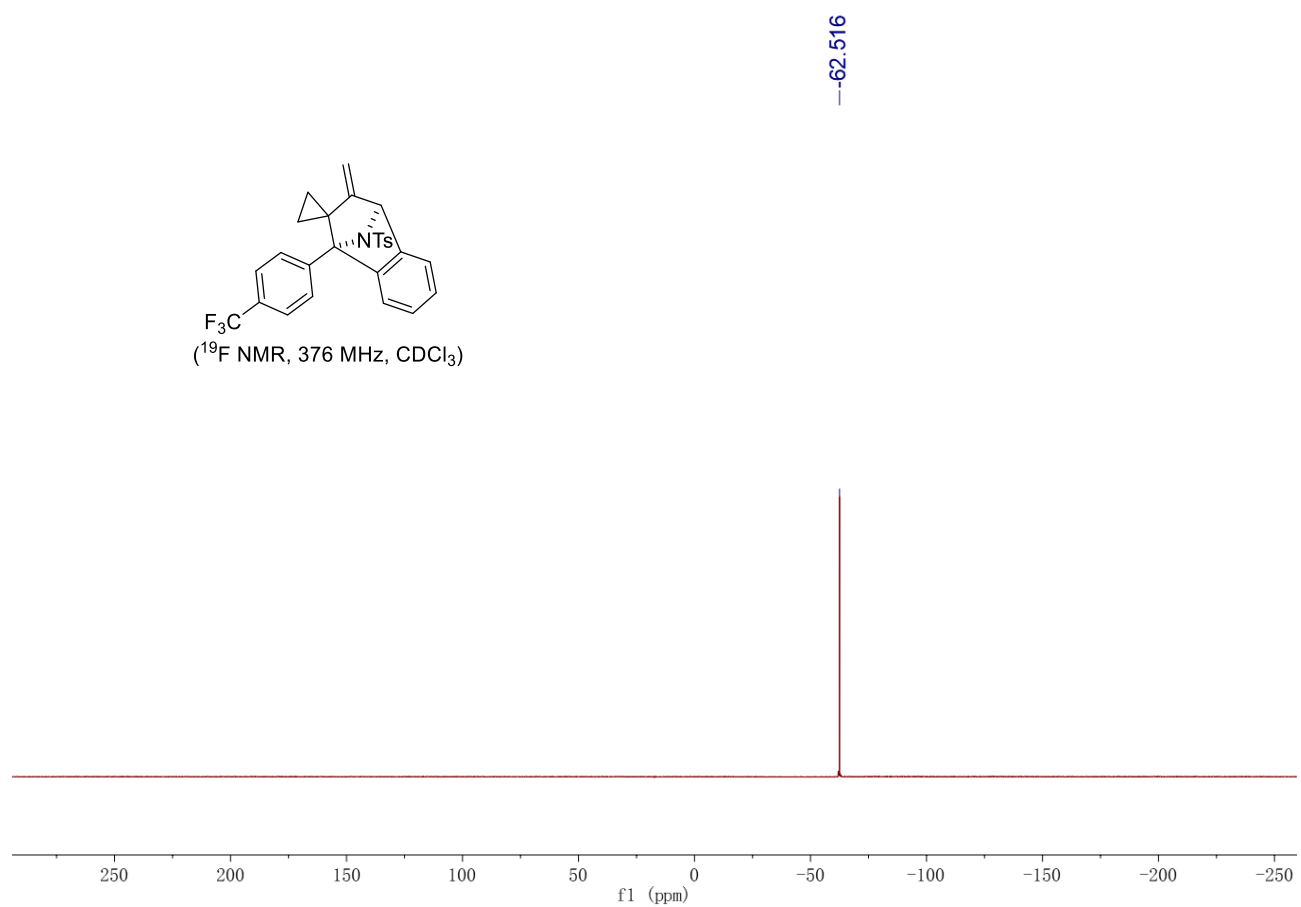



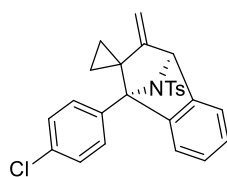

***N*-(1'-(4-chlorophenyl)-3'-methylene-3',4'-dihydro-1'*H*-spiro[cyclopropane-1,2'-naphthalen]-1'-yl)-*N*,4-dimethylbenzenesulfonamide (3g):** Yield: 20 mg, 22%, white solid, m.p. > 200 °C; Eluent: PE/EA = 30/1. <sup>1</sup>H NMR (400 MHz, CDCl<sub>3</sub>, TMS) δ 7.56 (d, *J* = 8.6 Hz, 2H), 7.30 – 7.22 (m, 3H), 7.16 – 7.08 (m, 2H), 7.05 (dd, *J*<sub>1</sub> = 7.6 Hz, *J*<sub>2</sub> = 1.2 Hz, 1H), 7.01 (d, *J* = 8.6 Hz, 2H), 6.89 (d, *J* = 8.0 Hz, 2H), 5.75 (s, 1H), 4.96 (s, 1H), 4.26 (s, 1H), 2.28 (s, 3H), 1.12 – 1.02 (m, 1H), 0.99 – 0.89 (m, 1H), 0.44 – 0.21 (m, 2H); <sup>13</sup>C{<sup>1</sup>H}-NMR (100 MHz, CDCl<sub>3</sub>, TMS) δ 151.3, 145.6, 142.9, 142.8, 136.4, 134.3, 131.6, 130.4, 128.5, 128.1, 127.4, 126.9, 126.7, 121.1, 120.7, 98.1, 78.6, 70.1, 36.3, 21.3, 16.8, 13.5; IR (neat): ν 3045, 2985, 2925, 1612, 1508, 1340, 1226, 1159, 990, 837, 743, 687 cm<sup>-1</sup>; HRMS (ESI-TOF) Calcd for C<sub>20</sub>H<sub>19</sub>NO<sub>2</sub>Na [M+Na]<sup>+</sup>: 470.09520, found: 470.09568.

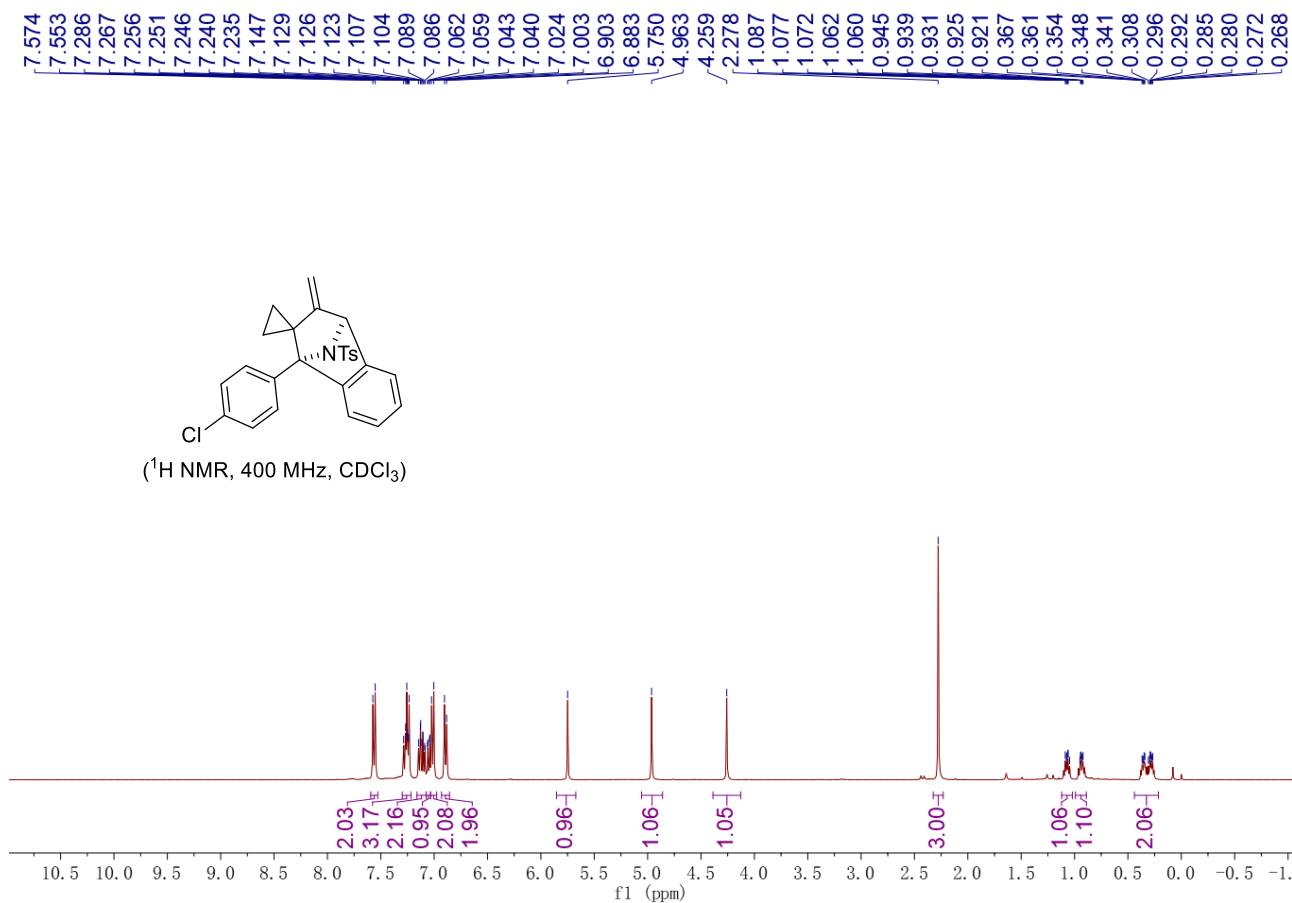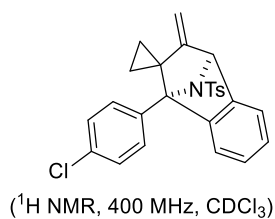

151.305  
 145.600  
 142.933  
 142.806  
 136.439  
 134.333  
 131.615  
 130.411  
 128.511  
 128.079  
 127.442  
 126.931  
 126.742  
 121.121  
 120.714  
 —98.069  
 78.622  
 77.318  
 77.000  
 76.682  
 70.089  
 —36.325  
 —21.346  
 —16.845  
 —13.493

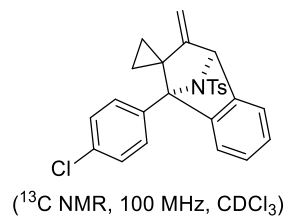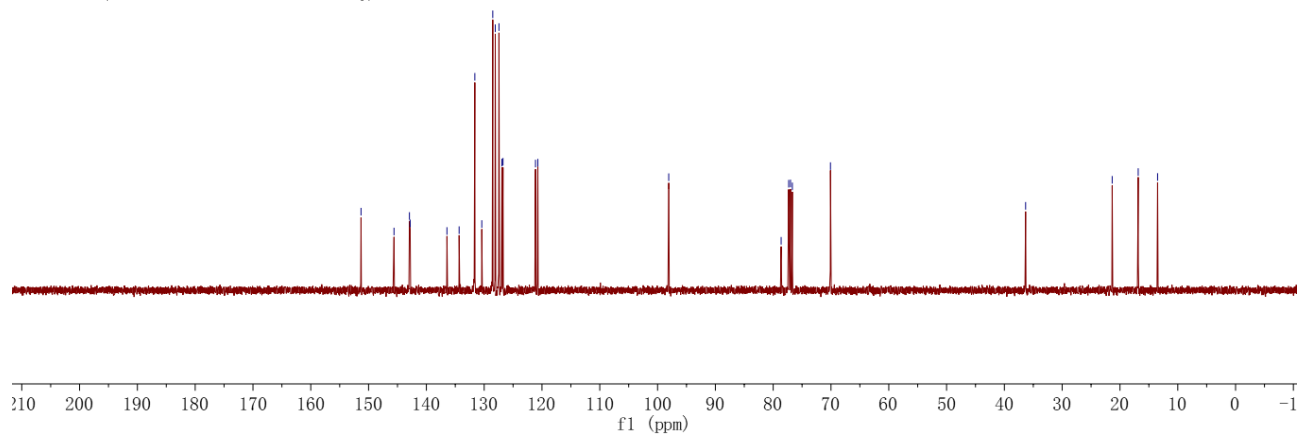

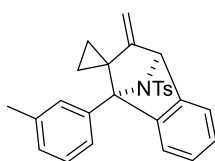

**N,4-dimethyl-N-(3'-methylene-1'-(m-tolyl)-3',4'-dihydro-1'H-spiro[cyclopropane-1,2'-naphthalen]-1'-yl)benzenesulfonamide (3h):** Yield: 17 mg, 20%, white solid, m.p. 195-197 °C; Eluent: PE/EA = 30/1. <sup>1</sup>H NMR (400 MHz, CDCl<sub>3</sub>, TMS) δ 7.47 (d, *J* = 8.0 Hz, 1H), 7.31 (d, *J* = 6.8 Hz, 1H), 7.28 – 7.23 (m, 1H), 7.19 (t, *J* = 7.6 Hz, 2H), 7.15 – 7.01 (m, 5H), 6.89 (d, *J* = 8.0 Hz, 2H), 5.77 (s, 1H), 4.97 (s, 1H), 4.27 (s, 1H), 2.28 (s, 3H), 2.22 (s, 3H), 1.24 – 1.13 (m, 1H), 1.00 – 0.90 (m, 1H), 0.47 – 0.37 (m, 1H), 0.34 – 0.23 (m, 1H); <sup>13</sup>C{<sup>1</sup>H}-NMR (100 MHz, CDCl<sub>3</sub>, TMS) δ 152.1, 146.6, 142.9, 142.6, 137.1, 136.7, 131.7, 131.5, 129.0, 128.4, 128.1, 127.2, 126.8, 126.7, 121.4, 120.5, 97.7, 79.3, 70.1, 36.1, 21.4, 21.4, 17.1, 13.8; IR (neat): ν 3065, 3034, 2916, 1665, 1594, 1458, 1324, 1153, 1091, 958, 874, 734, 653 cm<sup>-1</sup>; HRMS (ESI-TOF) Calcd for C<sub>20</sub>H<sub>19</sub>NO<sub>2</sub>Na [M+Na]<sup>+</sup>: 450.14982, found: 450.15064.

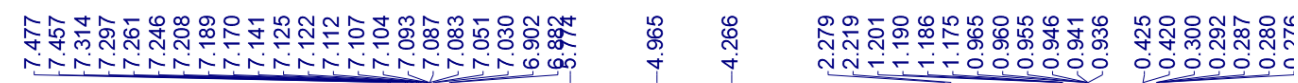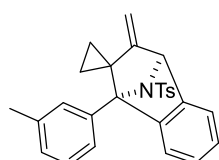

(<sup>1</sup>H NMR, 400 MHz, CDCl<sub>3</sub>)

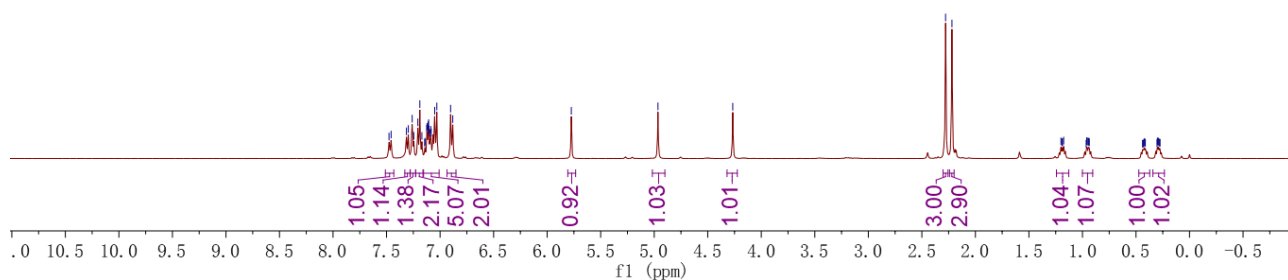

152.093  
 146.594  
 142.933  
 142.598  
 137.120  
 136.713  
 131.743  
 131.471  
 128.957  
 128.416  
 128.106  
 127.220  
 126.761  
 126.693  
 121.423  
 120.501  
 -97.737  
 79.320  
 77.317  
 77.000  
 76.682  
 70.136  
 -36.121  
 21.393  
 21.354  
 17.073  
 13.790

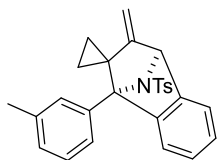

(<sup>13</sup>C NMR, 100 MHz, CDCl<sub>3</sub>)

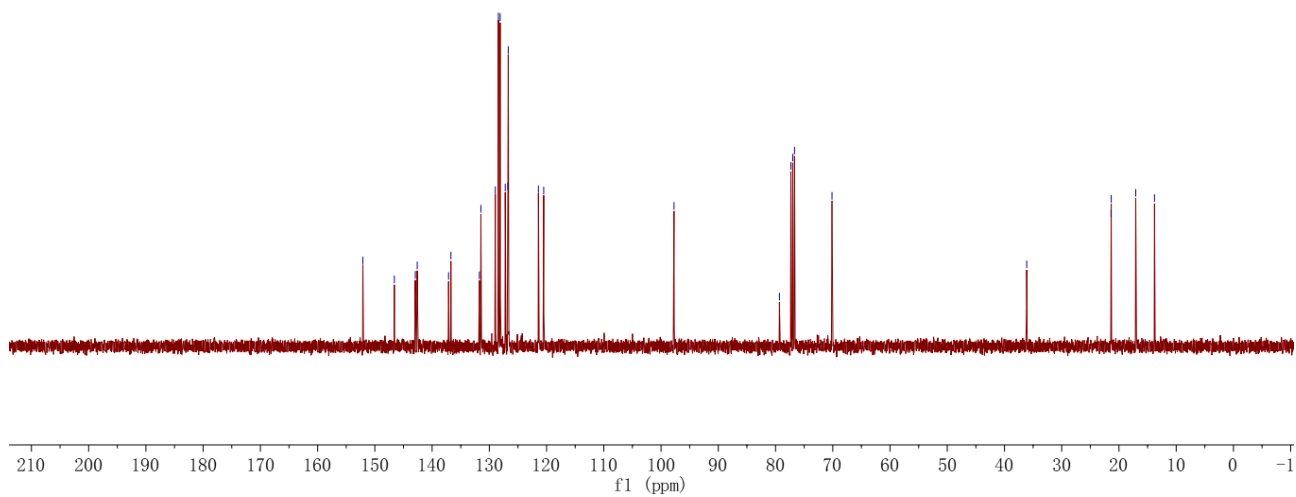

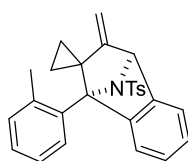

***N*,4-dimethyl-*N*-(3'-methylene-1'-(*o*-tolyl)-3',4'-dihydro-1'*H*-spiro[cyclopropane-1,2'-naphthalen]-1'-yl)benzenesulfonamide (3i):** Yield: 43 mg, 51%, white solid, m.p. 155-157 °C; Eluent: PE/EA = 30/1. <sup>1</sup>H NMR (400 MHz, CDCl<sub>3</sub>, TMS) δ 7.99 (s, 1H), 7.52 – 6.49 (m, 11H), 5.67 (s, 1H), 4.95 (s, 1H), 4.27 (s, 1H), 2.49 (s, 3H), 2.24 (s, 3H), 1.45 – 0.85 (m, 2H), 0.54 – 0.01 (m, 2H); <sup>13</sup>C{<sup>1</sup>H}-NMR (100 MHz, CDCl<sub>3</sub>, TMS) δ 132.5, 128.6, 128.3, 126.6, 124.5, 98.0, 69.5, 22.6, 21.3, 18.4; IR (neat): ν 3058, 2922, 2846, 1675, 1599, 1458, 1340, 1158, 1087, 991, 876, 772, 692 cm<sup>-1</sup>; HRMS (ESI-TOF) Calcd for C<sub>20</sub>H<sub>19</sub>NO<sub>2</sub>Na [M+Na]<sup>+</sup>: 450.14982, found: 450.15029

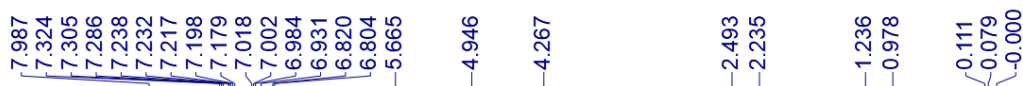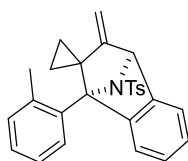

(<sup>1</sup>H NMR, 400 MHz, CDCl<sub>3</sub>)

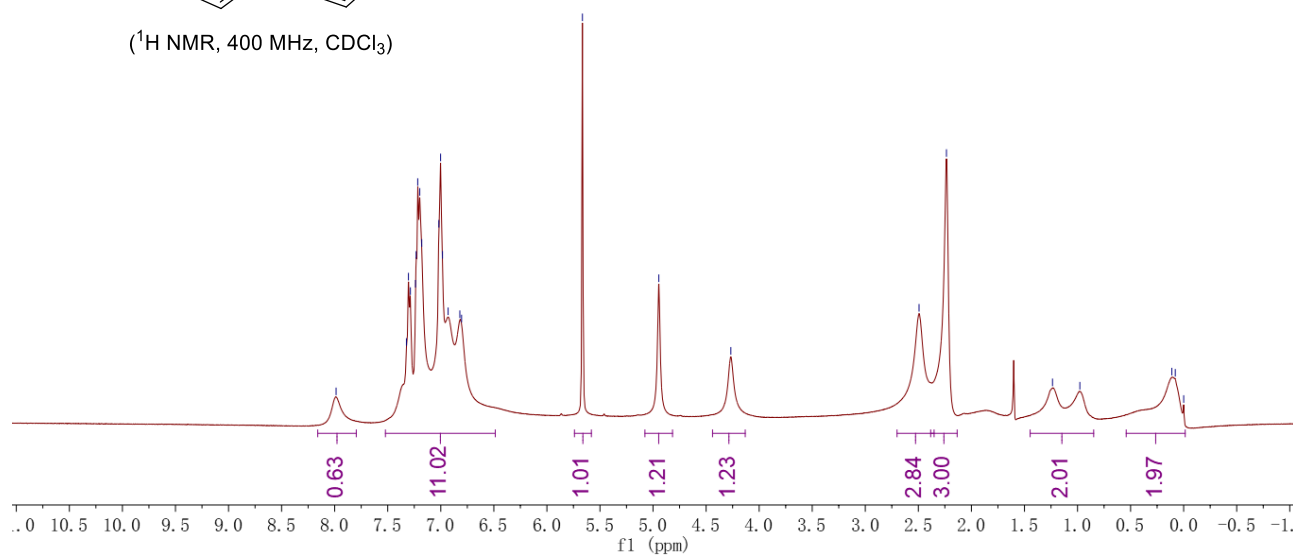

132.463  
128.623  
128.310  
126.580  
124.463

-98.044

77.320  
77.001  
76.684  
69.525

22.554  
21.310  
18.430

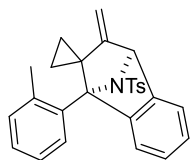

(<sup>13</sup>C NMR, 100 MHz, CDCl<sub>3</sub>)

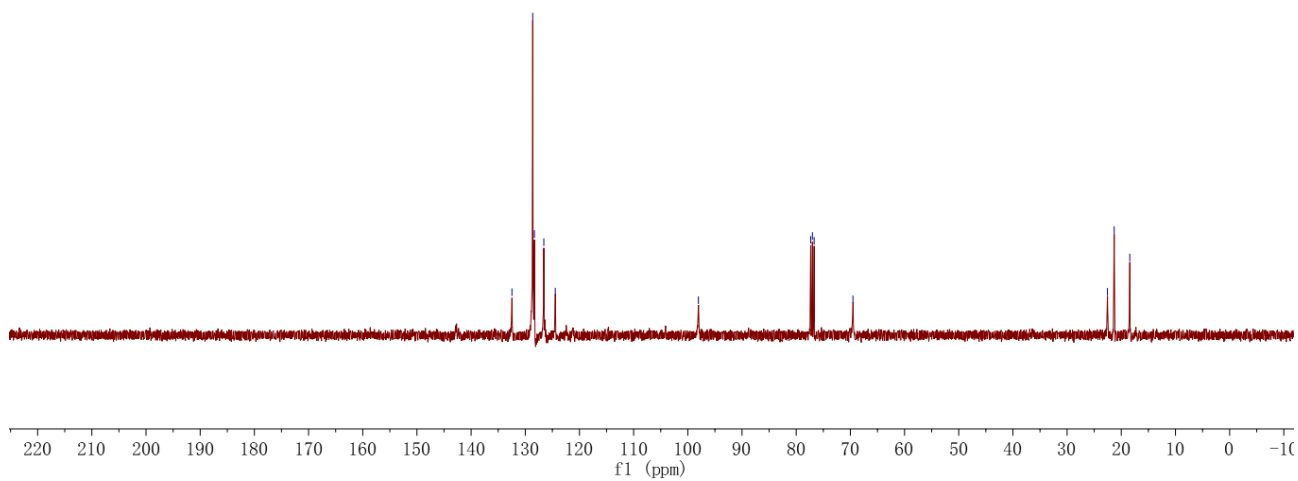

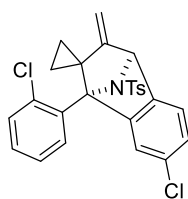

***N*-(7'-chloro-1'-(2-chlorophenyl)-3'-methylene-3',4'-dihydro-1'*H*-spiro[cyclopropane-1,2'-naphthalen]-1'-yl)-*N*,4-dimethylbenzenesulfonamide (j):** Yield: 39 mg, 41%, white solid, m.p. > 200 °C; Eluent: PE/EA = 30/1. <sup>1</sup>H NMR (400 MHz, CDCl<sub>3</sub>, TMS) δ 8.05 (s, 1H), 7.55 – 6.77 (m, 11H), 5.61 (s, 1H), 4.96 (s, 1H), 4.31 (s, 1H), 2.33 (s, 3H), 1.42 – 1.02 (m, 2H), 0.39 – 0.03 (m, 2H); <sup>13</sup>C{<sup>1</sup>H}-NMR (100 MHz, CDCl<sub>3</sub>, TMS) δ 143.3, 132.5, 130.1, 128.6, 128.5, 126.0, 98.6, 68.9, 55.0, 21.4, 19.3; IR (neat): ν 2951, 2921, 2846, 1646, 1591, 1471, 1343, 1158, 1083, 889, 689 cm<sup>-1</sup>; HRMS (ESI-TOF) Calcd for C<sub>20</sub>H<sub>19</sub>NO<sub>2</sub>Na [M+Na]<sup>+</sup>: 504.05623, found: 504.05619.

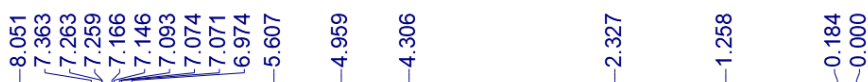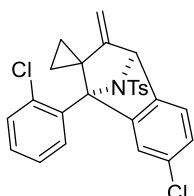

(<sup>1</sup>H NMR, 400 MHz, CDCl<sub>3</sub>)

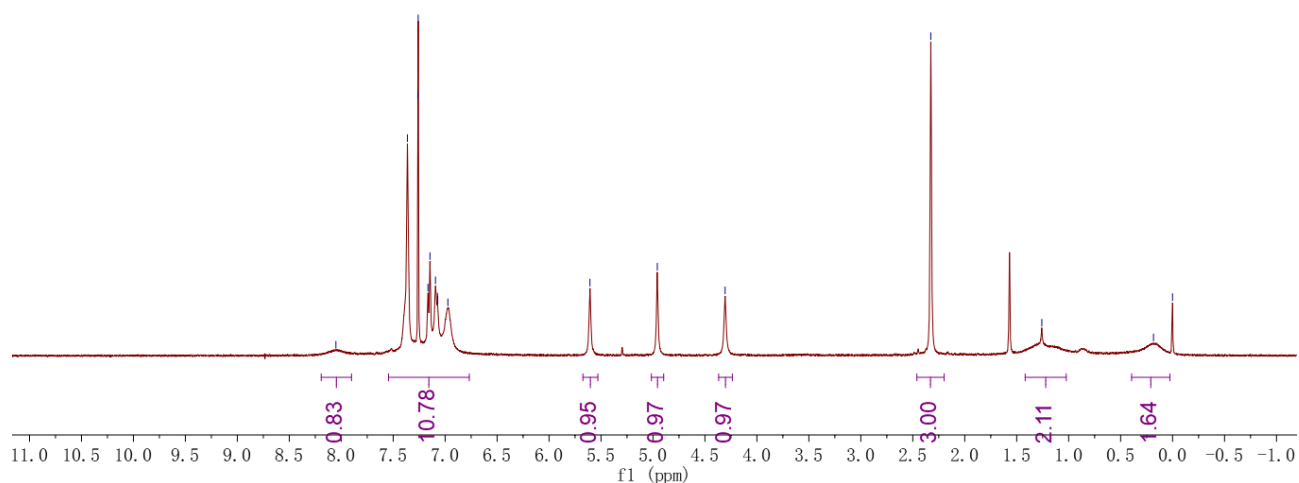

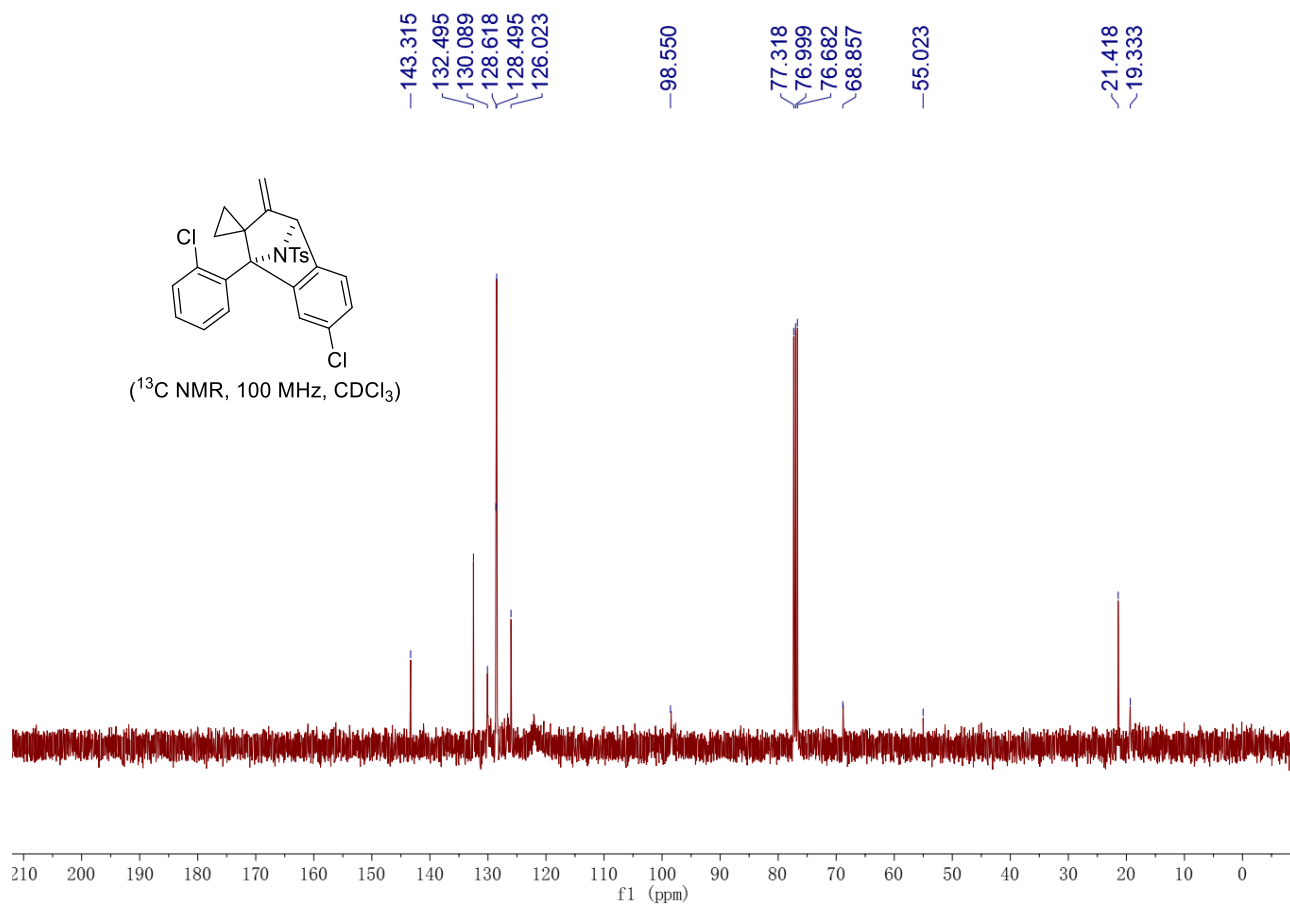



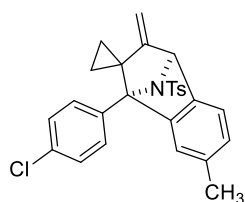

***N*-(1'-(4-chlorophenyl)-7'-methyl-3'-methylene-3',4'-dihydro-1'*H*-spiro[cyclopropane-1,2'-naphthalen]-1'-yl)-*N*,4-dimethylbenzenesulfonamide (3k):** Yield: 21 mg, 23%, white solid, m.p. > 200 °C; Eluent: PE/EA = 30/1. <sup>1</sup>H NMR (400 MHz, CDCl<sub>3</sub>, TMS) δ 7.55 (d, *J* = 8.0 Hz, 2H), 7.25 (d, *J* = 7.6 Hz, 2H), 7.17 (d, *J* = 7.2 Hz, 1H), 6.99 (d, *J* = 8.0 Hz, 2H), 6.95 – 6.87 (m, 4H), 5.72 (s, 1H), 4.94 (s, 1H), 4.24 (s, 1H), 2.30 (s, 3H), 2.25 (s, 3H), 1.07 – 0.96 (m, 1H), 0.95 – 0.84 (m, 1H), 0.44 – 0.24 (m, 2H); <sup>13</sup>C{<sup>1</sup>H}-NMR (100 MHz, CDCl<sub>3</sub>, TMS) δ 151.6, 146.1, 142.8, 140.1, 136.6, 134.2, 131.5, 130.7, 128.4, 128.2, 127.5, 127.3, 122.0, 120.4, 97.7, 78.7, 70.1, 36.3, 21.6, 21.3, 16.7, 13.4; IR (neat): ν 3073, 2917, 2849, 1664, 1591, 1495, 1332, 1155, 1003, 808, 652 cm<sup>-1</sup>; HRMS (ESI-TOF) Calcd for C<sub>20</sub>H<sub>19</sub>NO<sub>2</sub>Na [M+Na]<sup>+</sup>: 484.11085, found: 484.11051.

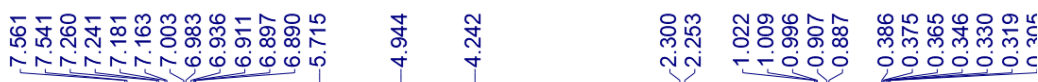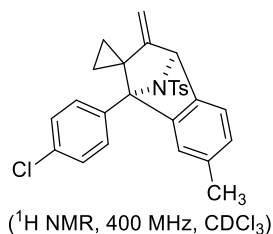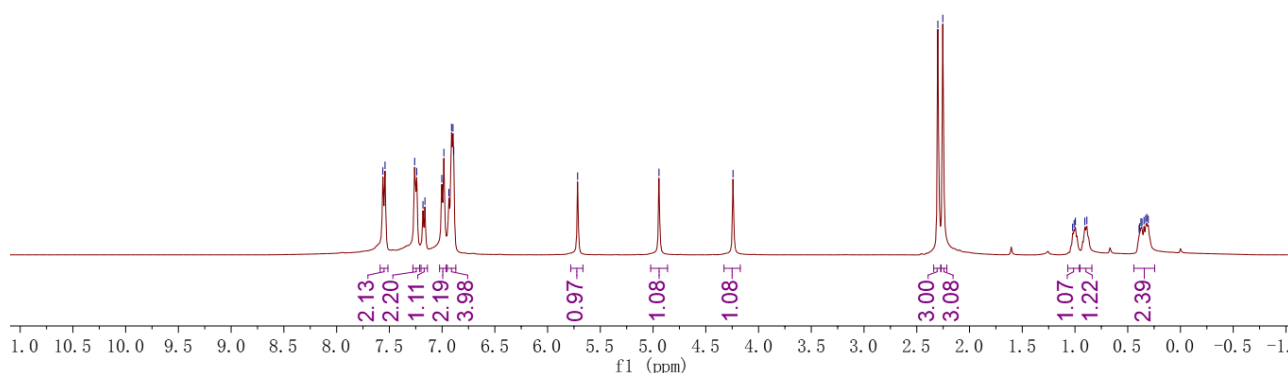

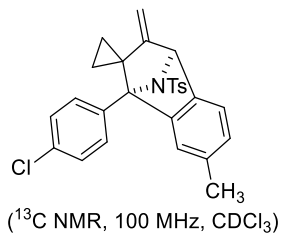

151.569  
146.139  
142.811  
140.087  
136.560  
134.238  
131.501  
130.700  
128.447  
128.152  
127.457  
127.336  
122.015  
120.422  
-97.692  
78.685  
77.318  
77.000  
76.683  
70.098  
-36.332  
21.571  
21.349  
16.738  
13.351

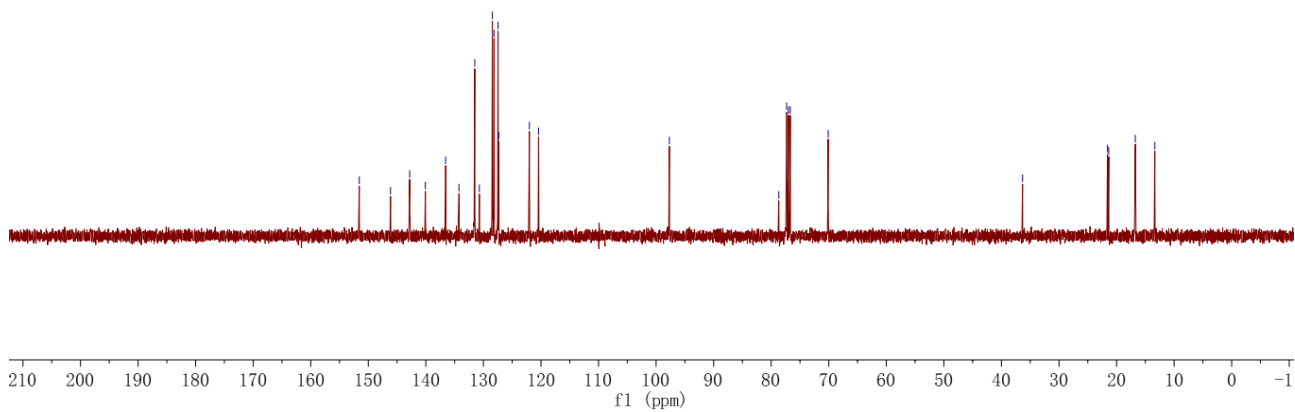

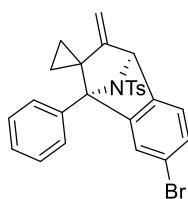

***N*-(7'-bromo-3'-methylene-1'-phenyl-3',4'-dihydro-1'*H*-spiro[cyclopropane-1,2'-naphthalen]-1'-yl)-*N*,4-dimethylbenzenesulfonamide (3l):** Yield: 21 mg, 21%, white solid, m.p. >200 °C; Eluent: PE/EA = 30/1. <sup>1</sup>H NMR (400 MHz, CDCl<sub>3</sub>, TMS) δ 7.62 – 7.56 (m, 2H), 7.37 – 7.30 (m, 3H), 7.28 – 7.22 (m, 2H), 7.17 (d, *J* = 7.6 Hz, 1H), 6.94 – 6.84 (m, 4H), 5.74 (s, 1H), 4.98 (s, 1H), 4.29 (s, 1H), 2.32 (s, 3H), 0.97 – 0.85 (m, 2H), 0.43 – 0.28 (m, 2H); <sup>13</sup>C{<sup>1</sup>H}-NMR (100 MHz, CDCl<sub>3</sub>, TMS) δ 150.5, 148.4, 143.2, 142.1, 136.0, 131.4, 129.8, 129.5, 128.5, 128.5, 128.2, 127.5, 124.7, 122.2, 120.8, 98.4, 79.4, 70.3, 36.5, 21.4, 16.7, 13.4; IR (neat): ν 3055, 2921, 2843, 1775, 1668, 1592, 1453, 1340, 1155, 1085, 863, 731, 663 cm<sup>-1</sup>; HRMS (ESI-TOF) Calcd for C<sub>20</sub>H<sub>19</sub>NO<sub>2</sub>Na [M+Na]<sup>+</sup>: 514.04468, found: 514.04511.

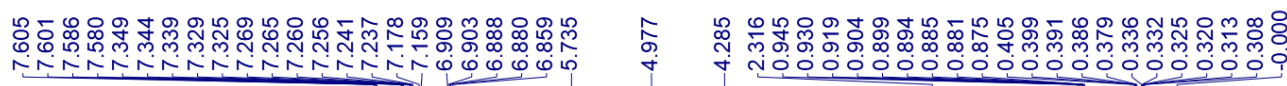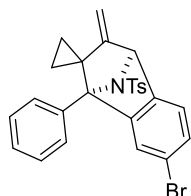

(<sup>1</sup>H NMR, 400 MHz, CDCl<sub>3</sub>)

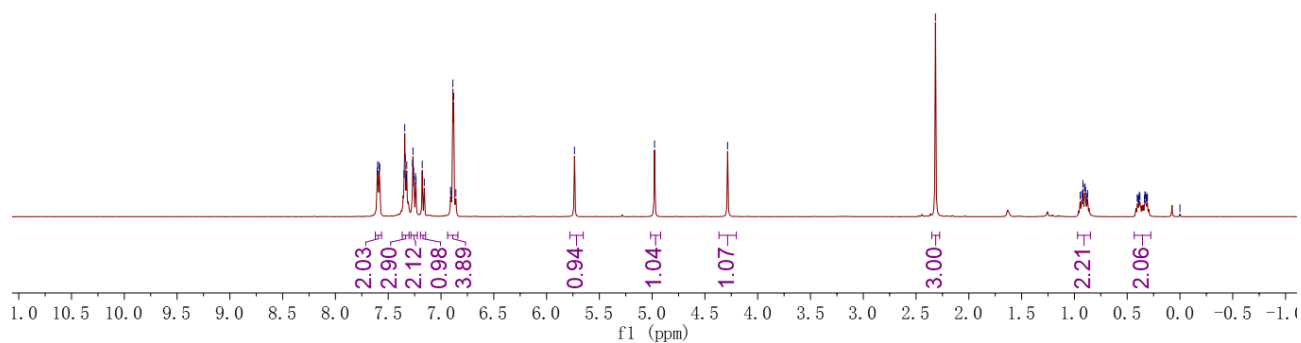

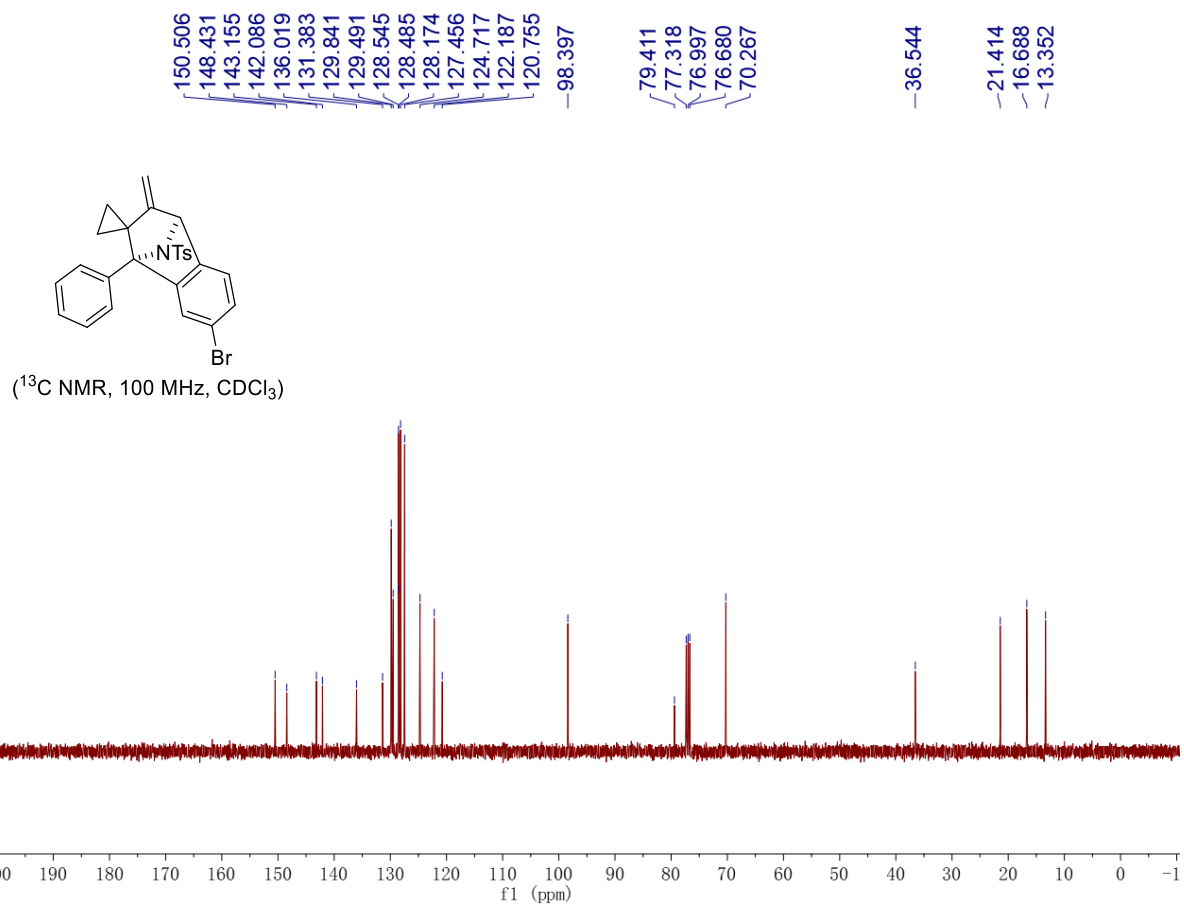

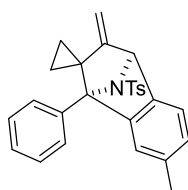

***N,4*-dimethyl-*N*-(7'-methyl-3'-methylene-1'-phenyl-3',4'-dihydro-1'*H*-spiro[cyclopropane-1,2'-naphthalen]-1'-yl)benzenesulfonamide (3m):** Yield: 23 mg, 27%, white solid, m.p. 181-183 °C; Eluent: PE/EA = 30/1.  $^1\text{H}$  NMR (400 MHz,  $\text{CDCl}_3$ , TMS)  $\delta$  7.62 (d,  $J = 7.6$  Hz, 2H), 7.35 – 7.28 (m, 3H), 7.17 (d,  $J = 7.6$  Hz, 1H), 6.98 – 6.89 (m, 4H), 6.85 (d,  $J = 8.4$  Hz, 2H), 5.72 (s, 1H), 4.94 (s, 1H), 4.24 (s, 1H), 2.27 (s, 3H), 2.24 (s, 3H), 1.05 – 0.97 (m, 1H), 0.92 – 0.82 (m, 1H), 0.46 – 0.37 (m, 1H), 0.35 – 0.27 (m, 1H);  $^{13}\text{C}\{^1\text{H}\}$ -NMR (100 MHz,  $\text{CDCl}_3$ , TMS)  $\delta$  151.9, 146.6, 142.5, 140.2, 136.7, 136.4, 132.2, 130.0, 128.3, 128.2, 128.2, 127.3, 127.1, 122.2, 120.3, 97.4, 79.4, 70.3, 36.4, 21.5, 21.3, 16.7, 13.3; IR (neat):  $\nu$  3052, 2924, 2856, 1772, 1594, 1445, 1342, 1157, 1087, 872, 703, 666  $\text{cm}^{-1}$ ; HRMS (ESI-TOF) Calcd for  $\text{C}_{20}\text{H}_{19}\text{NO}_2\text{Na}$   $[\text{M}+\text{Na}]^+$ : 450.14982, found: 450.14922.

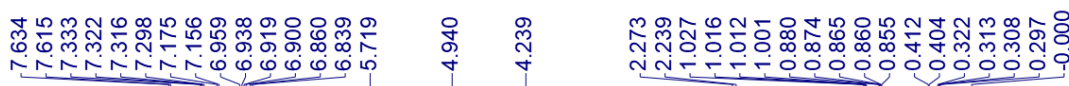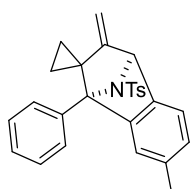

( $^1\text{H}$  NMR, 400 MHz,  $\text{CDCl}_3$ )

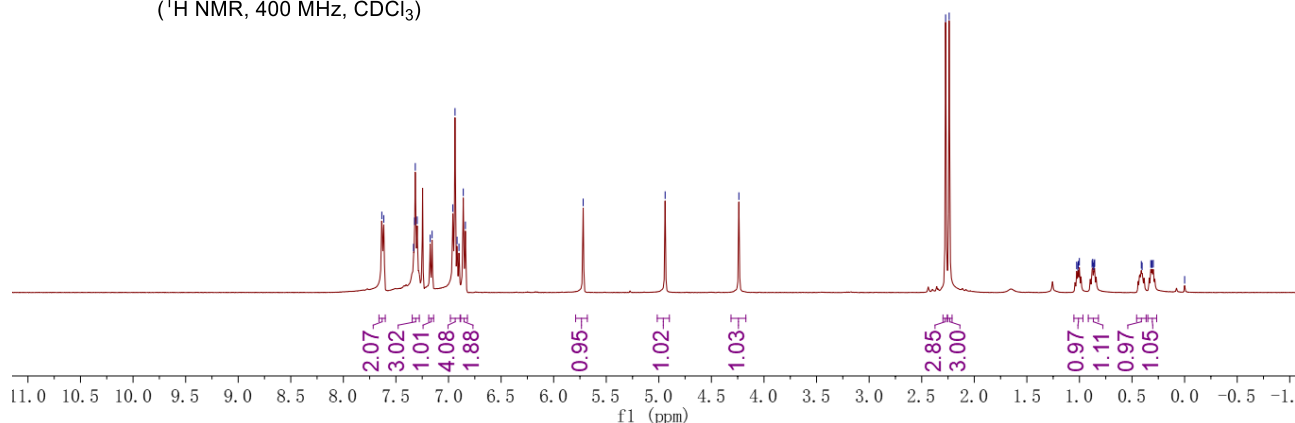

151.917  
 146.637  
 142.480  
 140.214  
 136.691  
 136.389  
 132.217  
 130.026  
 128.322  
 128.213  
 128.155  
 127.250  
 127.123  
 122.249  
 120.311  
 —97.439  
 79.365  
 77.317  
 77.203  
 77.000  
 76.682  
 70.335  
 —36.430  
 21.546  
 21.309  
 16.718  
 13.296

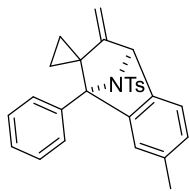

(<sup>13</sup>C NMR, 100 MHz, CDCl<sub>3</sub>)

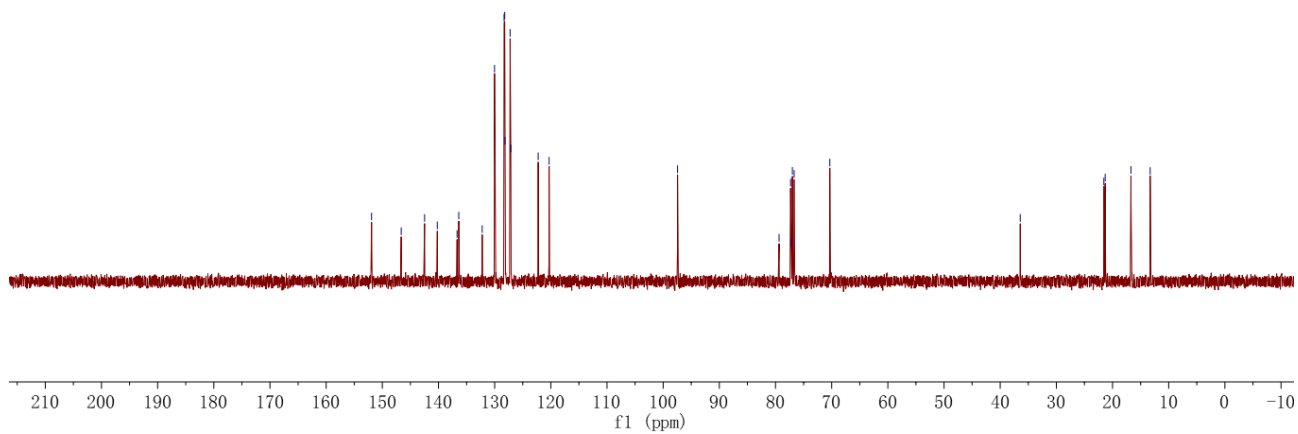

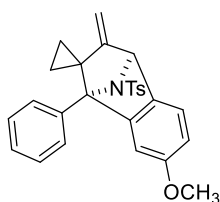

***N*-(7'-methoxy-3'-methylene-1'-phenyl-3',4'-dihydro-1'*H*-spiro[cyclopropane-1,2'-naphthalen]-1'-yl)-*N*,4-dimethylbenzenesulfonamide (3n):** Yield: 22 mg, 25%, white solid, m.p. > 200 °C; Eluent: PE/EA = 30/1. <sup>1</sup>H NMR (400 MHz, CDCl<sub>3</sub>, TMS) δ 7.64 – 7.58 (m, 2H), 7.35 – 7.27 (m, 3H), 7.17 (d, *J* = 8.0 Hz, 1H), 6.96 (d, *J* = 8.0 Hz, 2H), 6.86 (d, *J* = 8.0 Hz, 2H), 6.74 (d, *J* = 2.4 Hz, 1H), 6.60 (dt, *J*<sub>1</sub> = 8.4 Hz, *J*<sub>2</sub> = 1.2 Hz, 1H), 5.71 (s, 1H), 4.92 (s, 1H), 4.23 (s, 1H), 3.73 (s, 3H), 2.27 (s, 3H), 1.07 – 0.94 (m, 1H), 0.94 – 0.83 (m, 1H), 0.48 – 0.35 (m, 1H), 0.35 – 0.25 (m, 1H); <sup>13</sup>C{<sup>1</sup>H}-NMR (100 MHz, CDCl<sub>3</sub>, TMS) δ 158.7, 151.9, 147.8, 142.5, 136.6, 135.3, 131.9, 130.0, 128.3, 128.2, 127.3, 127.1, 121.1, 110.0, 109.9, 97.1, 79.3, 70.0, 55.5, 36.5, 21.3, 16.7, 13.3; IR (neat): ν 3071, 2977, 2914, 1670, 1589, 1471, 1341, 1283, 1152, 1084, 979, 870, 729, 670 cm<sup>-1</sup>; HRMS (ESI-TOF) Calcd for C<sub>20</sub>H<sub>19</sub>NO<sub>2</sub>Na [M+Na]<sup>+</sup>: 466.14474, found: 466.14390.

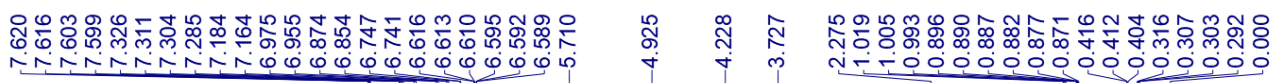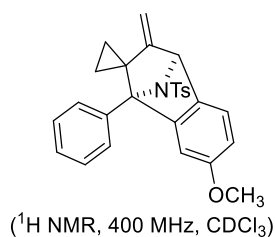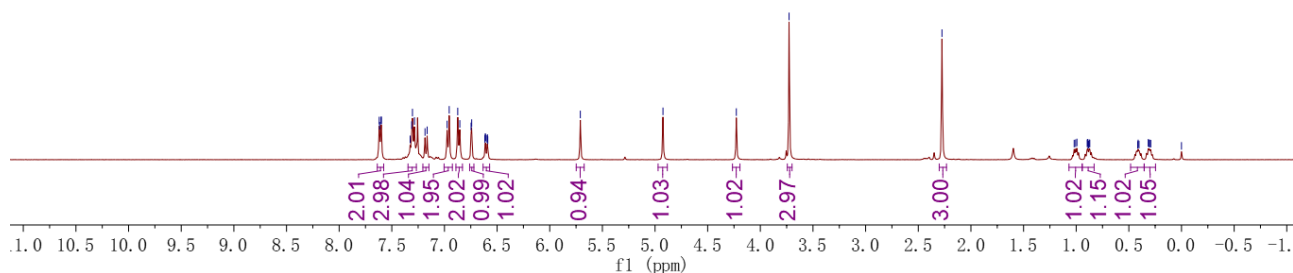

158.679  
151.866  
147.824  
142.528  
136.595  
135.346  
131.873  
130.010  
128.330  
128.233  
127.261  
127.088  
121.059  
109.992  
109.884  
— 97.121  
79.302  
77.318  
77.202  
77.000  
76.682  
70.030  
— 55.462  
— 36.510  
— 21.284  
— 16.700  
— 13.299

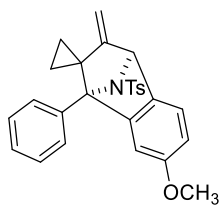

(<sup>13</sup>C NMR, 100 MHz, CDCl<sub>3</sub>)

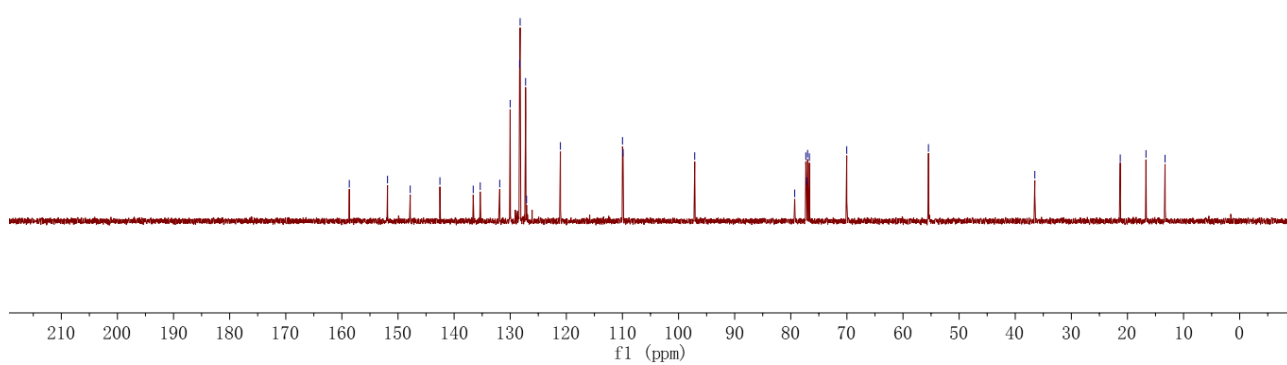



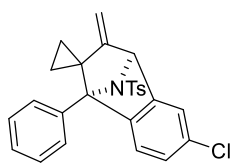

***N*-(6'-chloro-3'-methylene-1'-phenyl-3',4'-dihydro-1'*H*-spiro[cyclopropane-1,2'-naphthalen]-1'-yl)-*N*,4-dimethylbenzenesulfonamide (3o):** Yield: 18 mg, 20%, white solid, m.p. > 200 °C; Eluent: PE/EA = 30/1. <sup>1</sup>H NMR (400 MHz, CDCl<sub>3</sub>, TMS) δ 7.56 (d, *J* = 8.4 Hz, 2H), 7.32 – 7.22 (m, 3H), 7.17 – 7.10 (m, 2H), 7.07 (d, *J* = 7.6 Hz, 1H), 7.03 (d, *J* = 8.4 Hz, 2H), 6.91 (d, *J* = 8.0 Hz, 2H), 5.75 (s, 1H), 4.97 (s, 1H), 4.27 (s, 1H), 2.30 (s, 3H), 1.09 (m, 1H), 1.01 – 0.89 (m, 1H), 0.43 – 0.23 (m, 2H); <sup>13</sup>C{<sup>1</sup>H}-NMR (100 MHz, CDCl<sub>3</sub>, TMS) δ 151.5, 145.8, 143.0, 142.9, 136.6, 134.4, 131.7, 130.5, 128.6, 128.2, 127.5, 127.0, 126.8, 121.2, 120.8, 98.1, 78.7, 70.2, 36.4, 29.4, 21.4, 16.9, 13.6; IR (neat): ν 3068, 2922, 2849, 1670, 1599, 1492, 1342, 1158, 1089, 1015, 830, 654 cm<sup>-1</sup>; HRMS (ESI-TOF) Calcd for C<sub>20</sub>H<sub>19</sub>NO<sub>2</sub>Na [M+Na]<sup>+</sup>: 470.09520, found: 470.09463.

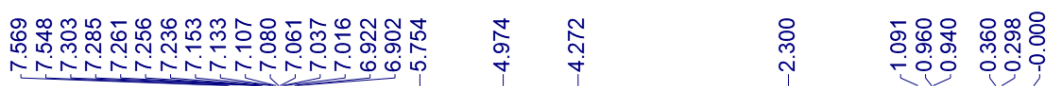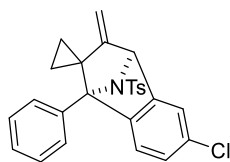

(<sup>1</sup>H NMR, 400 MHz, CDCl<sub>3</sub>)

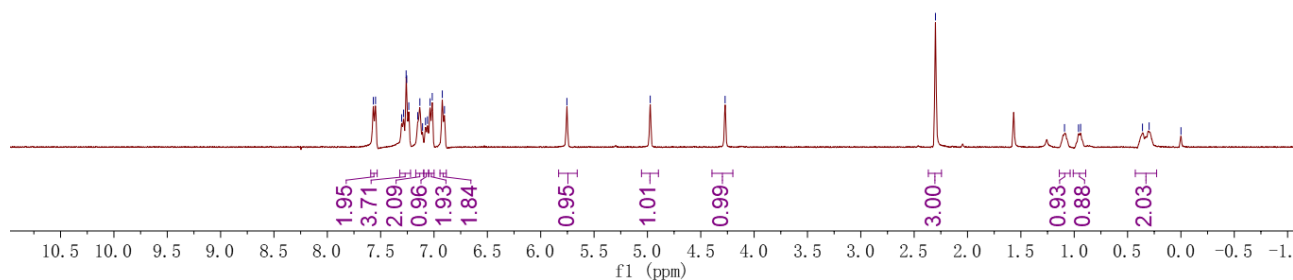

151.467  
 145.771  
 142.975  
 142.926  
 136.629  
 134.427  
 131.665  
 130.506  
 128.571  
 128.167  
 127.518  
 126.998  
 126.795  
 121.174  
 120.767  
 — 98.093  
 78.706  
 77.318  
 77.202  
 77.000  
 76.683  
 70.163  
 36.351  
 29.408  
 21.406  
 16.920  
 13.581

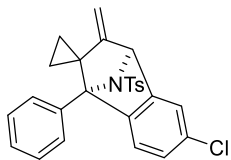

(<sup>13</sup>C NMR, 100 MHz, CDCl<sub>3</sub>)

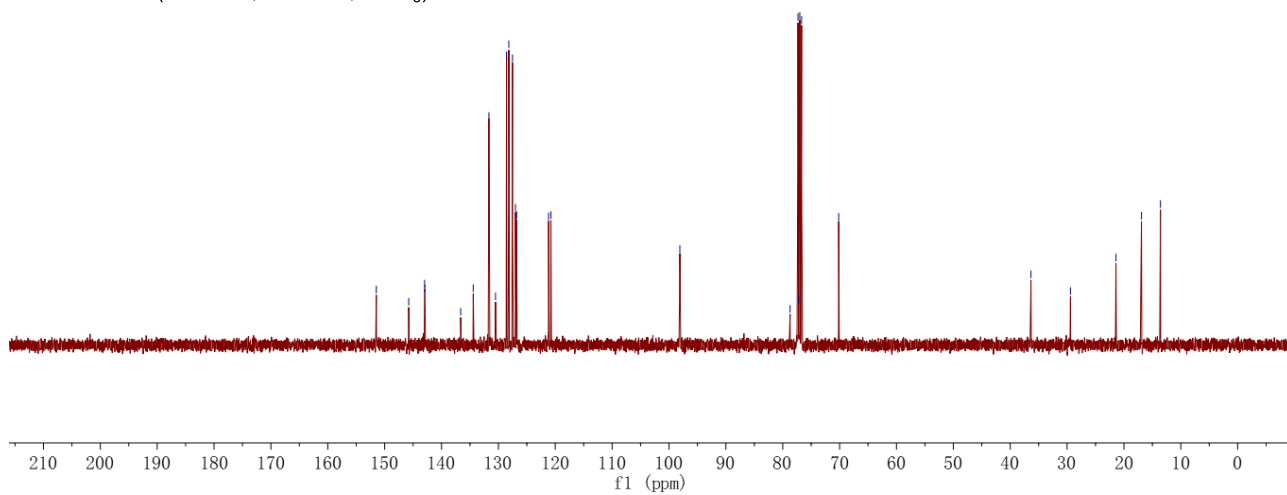

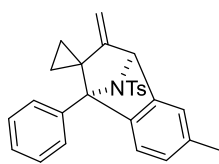

***N*,4-dimethyl-*N*-(6'-methyl-3'-methylene-1'-phenyl-3',4'-dihydro-1'*H*-spiro[cyclopropane-1,2'-naphthalen]-1'-yl)benzenesulfonamide (3p):** Yield: 22 mg, 26%, white solid, m.p. 161-163 °C; Eluent: PE/EA = 30/1. <sup>1</sup>H NMR (400 MHz, CDCl<sub>3</sub>, TMS) δ 7.67 – 7.60 (m, 2H), 7.35 – 7.27 (m, 3H), 7.12 – 7.06 (m, 2H), 7.00 (d, *J* = 8.0 Hz, 2H), 6.87 (d, *J* = 8.0 Hz, 2H), 6.83 (d, *J* = 7.6 Hz, 1H), 5.68 (s, 1H), 4.95 (s, 1H), 4.26 (s, 1H), 2.29 (s, 3H), 2.28 (s, 3H), 1.12 – 1.02 (m, 1H), 0.96 – 0.85 (m, 1H), 0.42 – 0.23 (m, 2H); <sup>13</sup>C{<sup>1</sup>H}-NMR (100 MHz, CDCl<sub>3</sub>, TMS) δ 151.8, 143.3, 143.3, 142.6, 136.7, 136.5, 132.1, 130.1, 128.3, 128.2, 128.2, 127.2, 127.0, 121.5, 121.2, 97.7, 79.3, 70.3, 36.6, 21.3, 21.1, 16.9, 13.3; IR (neat): ν 3047, 2916, 2848, 1665, 1594, 1448, 1341, 1159, 1088, 880, 732, 691 cm<sup>-1</sup>; HRMS (ESI-TOF) Calcd for C<sub>20</sub>H<sub>19</sub>NO<sub>2</sub>Na [M+Na]<sup>+</sup>: 450.14982, found: 450.14933.

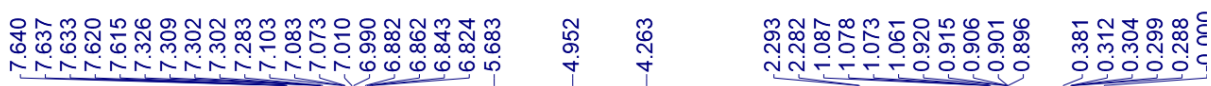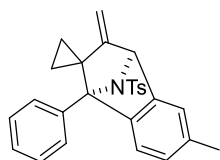

(<sup>1</sup>H NMR, 400 MHz, CDCl<sub>3</sub>)

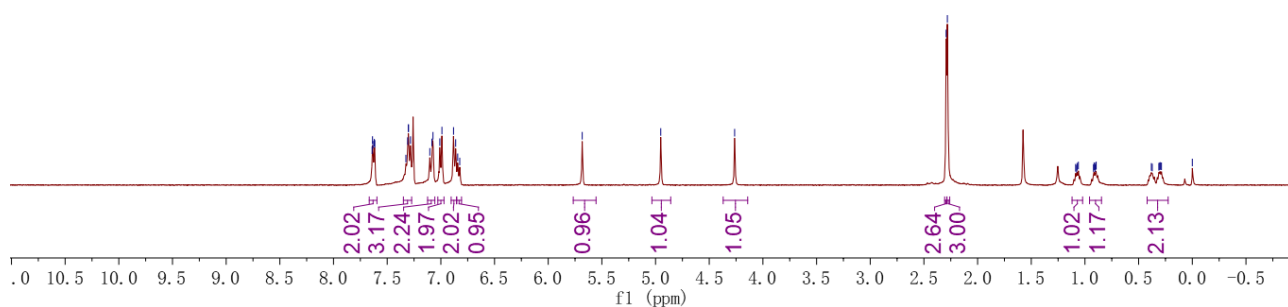

151.838  
 143.286  
 143.263  
 142.563  
 136.669  
 136.541  
 132.074  
 130.129  
 128.295  
 128.210  
 128.170  
 127.184  
 126.986  
 121.544  
 121.164  
 —97.680  
 79.298  
 77.319  
 77.000  
 76.683  
 70.271  
 —36.635  
 21.327  
 21.074  
 16.893  
 13.331

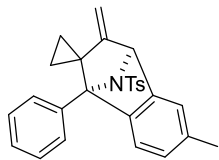

(<sup>13</sup>C NMR, 100 MHz, CDCl<sub>3</sub>)

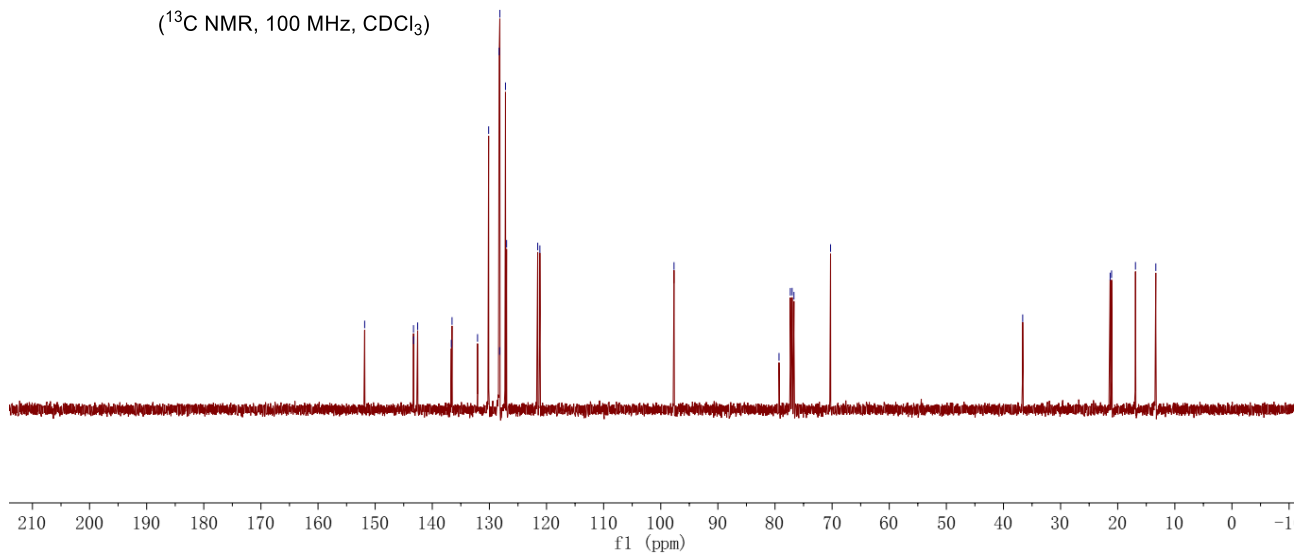

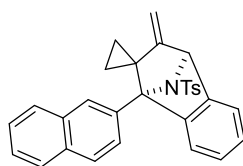

***N*,4-dimethyl-*N*-(3'-methylene-1'-(naphthalen-2-yl)-3',4'-dihydro-1'*H*-spiro[cyclopropane-1,2'-naphthalen]-1'-yl)benzenesulfonamide (3q):** Yield: 19 mg, 20%, white solid, m.p. >200 °C; Eluent: PE/EA = 30/1. <sup>1</sup>H NMR (400 MHz, CDCl<sub>3</sub>, TMS) δ 8.07 (s, 1H), 7.83 (d, *J* = 7.6 Hz, 1H), 7.76 (d, *J* = 7.6 Hz, 1H), 7.71 (s, 2H), 7.51 (t, *J* = 7.2 Hz, 2H), 7.32 (d, *J* = 7.6 Hz, 2H), 7.12 (t, *J* = 7.6 Hz, 2H), 6.96 (d, *J* = 8.0 Hz, 2H), 6.74 (d, *J* = 8.0 Hz, 2H), 5.81 (s, 1H), 5.00 (s, 1H), 4.29 (s, 1H), 2.21 (s, 3H), 1.30 – 1.20 (m, 1H), 1.03 – 0.95 (m, 1H), 0.50 – 0.40 (m, 1H), 0.36 – 0.26 (m, 1H); <sup>13</sup>C{<sup>1</sup>H}-NMR (100 MHz, CDCl<sub>3</sub>, TMS) δ 151.9, 146.2, 143.0, 142.7, 136.6, 132.9, 132.2, 129.6, 128.8, 128.7, 128.4, 128.3, 128.2, 127.4, 126.9, 126.8, 126.7, 126.5, 125.9, 121.5, 120.7, 97.9, 79.3, 70.1, 36.3, 21.3, 17.1, 13.8; IR (neat): ν 3047, 2984, 2916, 1668, 1589, 1456, 1324, 1152, 1091, 958, 873, 741, 661 cm<sup>-1</sup>; HRMS (ESI-TOF) Calcd for C<sub>20</sub>H<sub>19</sub>NO<sub>2</sub>Na [M+Na]<sup>+</sup>: 486.14982, found: 486.15015.

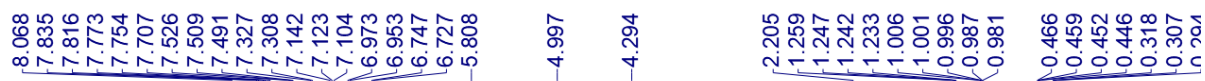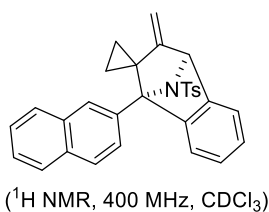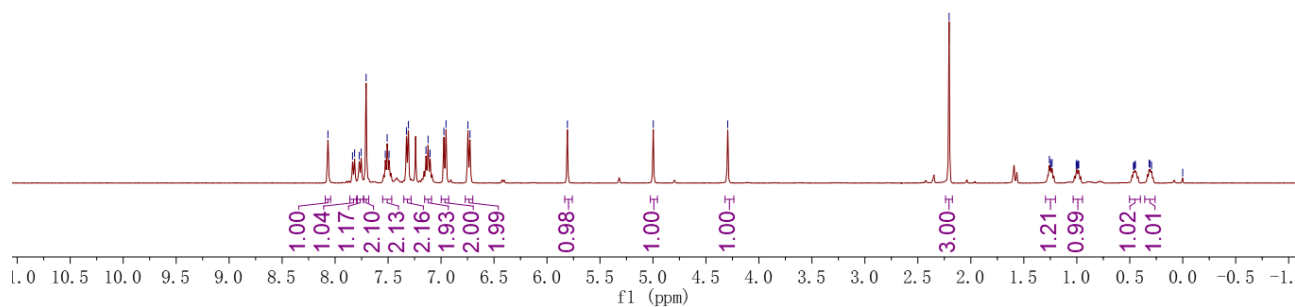

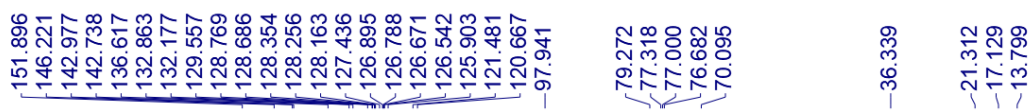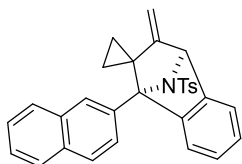

(<sup>13</sup>C NMR, 100 MHz, CDCl<sub>3</sub>)

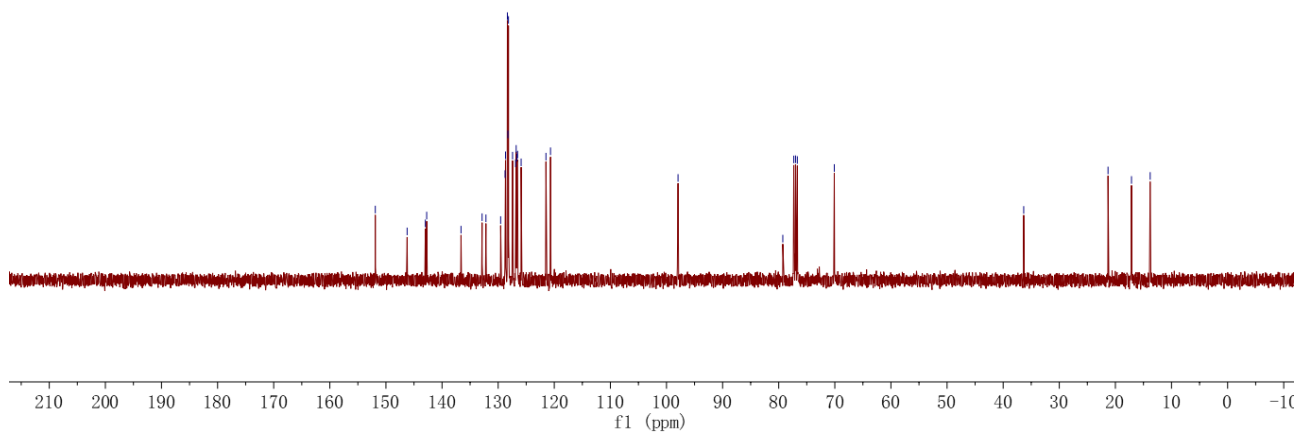

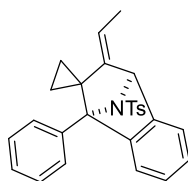

***N*-(3'-ethylidene-1'-phenyl-3',4'-dihydro-1'*H*-spiro[cyclopropane-1,2'-naphthalen]-1'-yl)-*N*,4-dimethylbenzenesulfonamide (3u):** Yield: 15 mg, 18%, white solid, *Z:E* = 1.5:1; m.p. 197-199 °C; Eluent: PE/EA = 30/1. <sup>1</sup>H NMR (400 MHz, CDCl<sub>3</sub>, TMS) δ 7.71 (d, *J* = 6.4 Hz, 1.34H), 7.64 (d, *J* = 6.8 Hz, 2H), 7.37 – 7.20 (m, 8.08H), 7.17 (d, *J* = 7.6 Hz, 1.33H), 7.08 (td, *J*<sub>1</sub> = 7.6 Hz, *J*<sub>2</sub> = 2.8 Hz, 2H), 7.05 – 6.91 (m, 3.94H), 6.90 – 6.75 (m, 4.81H), 6.04 (s, 1H), 5.59 – 5.48 (m, 1.33H), 4.62 (q, *J* = 6.8 Hz, 1H), 2.28 – 2.21 (m, 4.5H), 1.82 (d, *J* = 6.8 Hz, 3H), 1.40 (d, *J* = 7.6 Hz, 2.34H), 1.06 – 0.97 (m, 1H), 0.91 – 0.75 (m, 2H), 0.74 – 0.60 (m, 1H), 0.38 – 0.29 (m, 1H), 0.29 – 0.21 (m, 0.7H), 0.22 – 0.12 (m, 1H); <sup>13</sup>C{<sup>1</sup>H}-NMR (100 MHz, CDCl<sub>3</sub>, TMS) δ 146.2, 145.2, 144.1, 142.8, 142.6, 142.5, 142.2, 139.5, 136.6, 136.3, 132.0, 131.7, 130.5, 130.2, 128.4, 128.3, 128.3, 128.2, 128.2, 127.2, 127.1, 126.7, 126.6, 126.4, 126.3, 121.6, 121.4, 120.4, 120.0, 113.1, 108.1, 80.6, 79.3, 72.3, 66.1, 37.1, 35.7, 21.4, 16.2, 14.0, 13.4, 12.6, 11.7, 9.2; IR (neat): ν 3058, 2982, 2919, 1594, 1453, 1339, 1156, 1087, 814, 680 cm<sup>-1</sup>; HRMS (ESI-TOF) Calcd for C<sub>20</sub>H<sub>19</sub>NO<sub>2</sub>Na [M+Na]<sup>+</sup>: 450.14982, found: 450.15006.

7.715  
7.699  
7.647  
7.630  
7.349  
7.335  
7.334  
7.318  
7.311  
7.292  
7.276  
7.270  
7.256  
7.248  
7.237  
7.227  
7.176  
7.157  
7.105  
7.098  
7.086  
7.080  
7.068  
7.061  
7.025  
7.007  
6.988  
6.972  
6.953  
6.877  
6.856  
6.835  
6.809  
6.789  
6.043  
5.556  
5.539  
4.630  
4.613  
2.258  
2.240  
1.828  
1.811  
1.408  
1.389  
0.837  
0.825  
0.819  
0.812  
0.803  
0.795

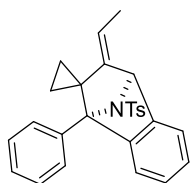

(<sup>1</sup>H NMR, 400 MHz, CDCl<sub>3</sub>)

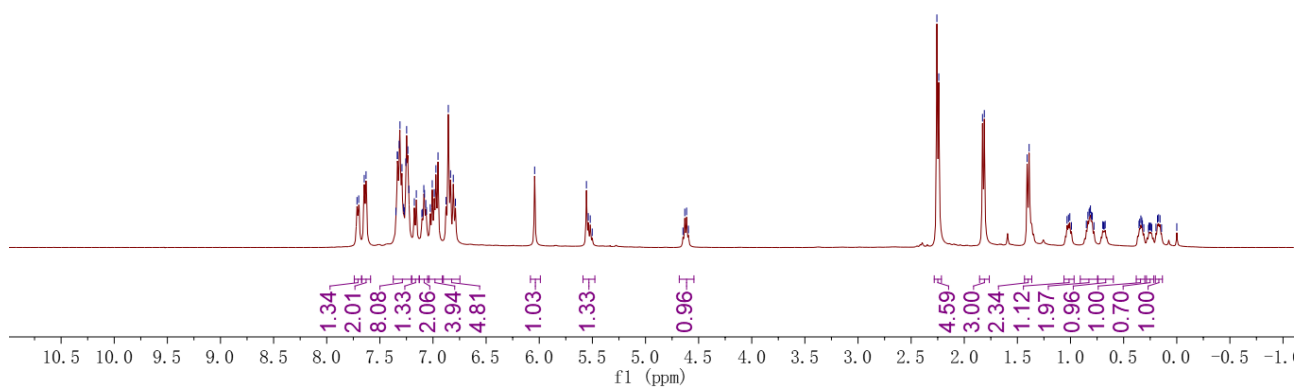

146.179  
144.051  
142.837  
142.563  
142.457  
142.211  
139.464  
136.602  
132.024  
131.739  
130.537  
130.228  
128.353  
128.282  
128.261  
128.211  
128.186  
127.189  
127.096  
126.660  
126.606  
126.418  
126.261  
121.567  
121.433  
120.425  
120.012  
113.053  
108.136  
80.589  
79.349  
77.317  
76.999  
76.680  
72.285  
66.057  
37.101  
35.722  
21.356  
16.178  
14.003  
13.376  
12.576  
11.652  
9.239

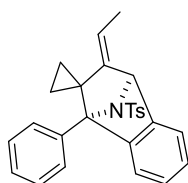

(<sup>13</sup>C NMR, 100 MHz, CDCl<sub>3</sub>)

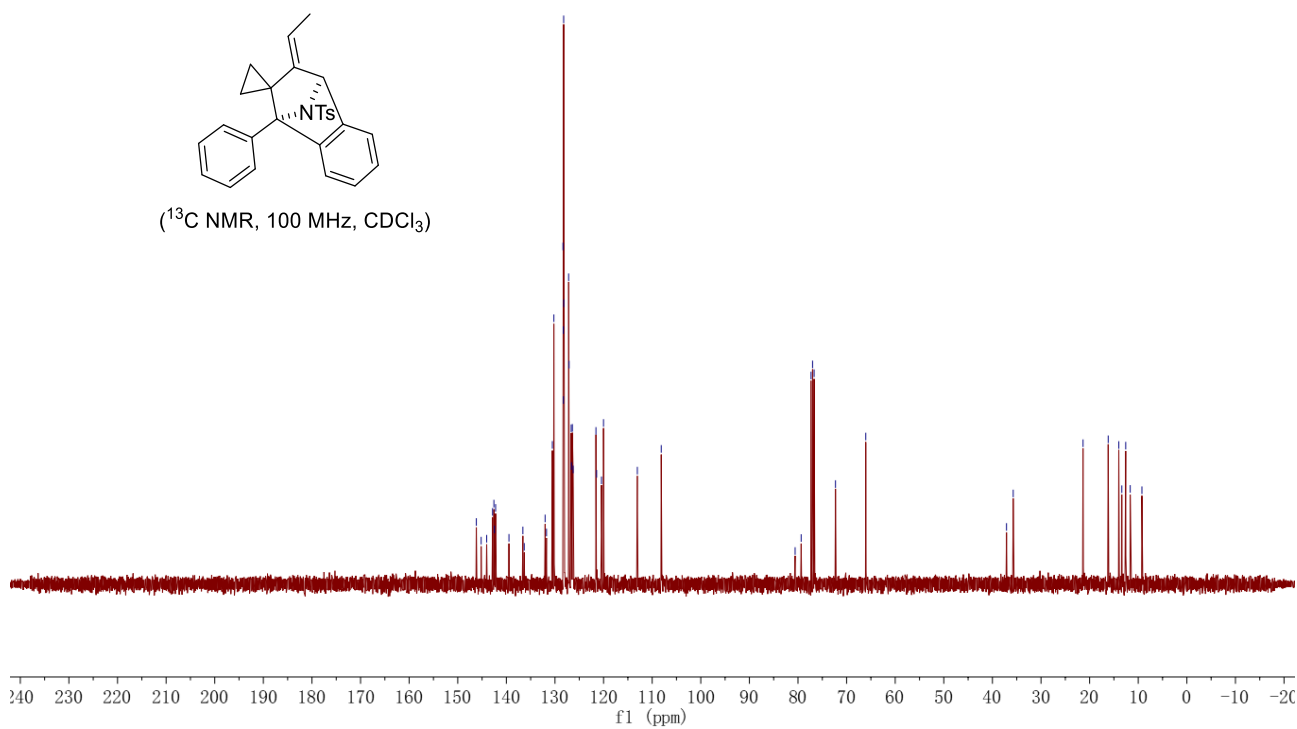



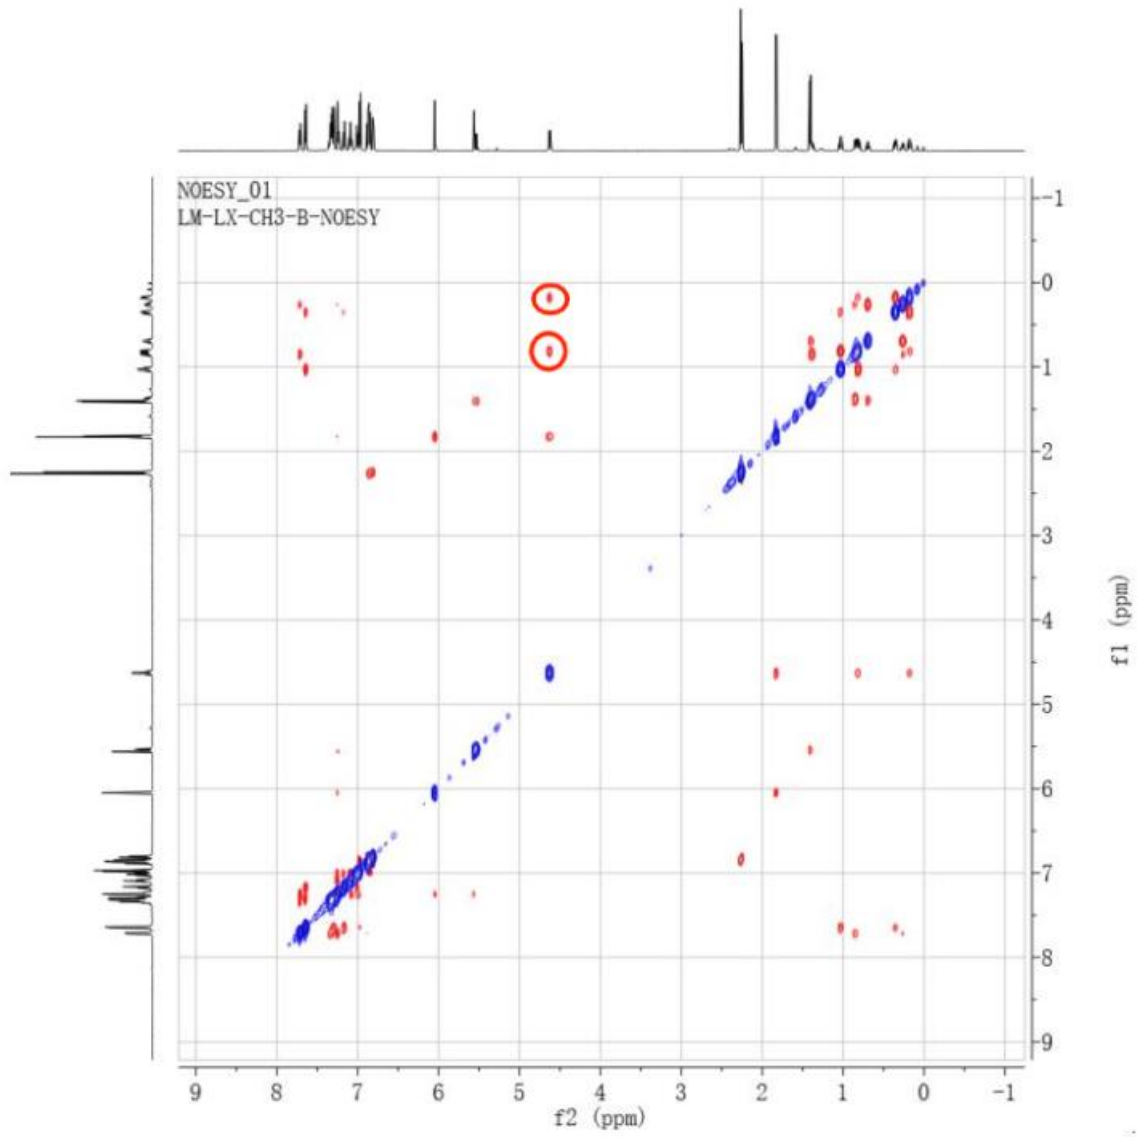

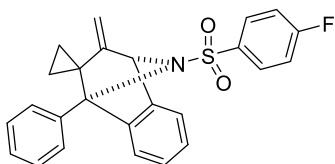

**9'-((4-fluorophenyl)sulfonyl)-3'-methylene-1'-phenyl-3',4'-dihydro-1'H-spiro[cyclopropane-1, 2'-[1,4]epiminonaphthalene] (3v):** Yield: 13 mg, 16%, white solid, m.p. 197-199 °C; Eluent: PE/EA = 30/1.  $^1\text{H}$  NMR (400 MHz,  $\text{CDCl}_3$ , TMS)  $\delta$  7.69 – 7.61 (m, 2H), 7.38 – 7.28 (m, 4H), 7.23 (d,  $J = 7.6$  Hz, 1H), 7.14 (t,  $J = 7.6$  Hz, 1H), 7.09 – 7.00 (m, 3H), 6.72 (t,  $J = 8.4$  Hz, 2H), 5.78 (s, 1H), 4.98 (s, 1H), 4.29 (s, 1H), 1.13 – 1.04 (m, 1H), 1.00 – 0.90 (m, 1H), 0.41 – 0.25 (m, 2H);  $^{13}\text{C}\{^1\text{H}\}$ -NMR (100 MHz,  $\text{CDCl}_3$ , TMS)  $\delta$  164.6 (d,  $J = 253.0$  Hz), 151.3, 145.9, 142.8, 135.5, 131.6, 130.9 (d,  $J = 9.4$  Hz), 130.3, 128.5, 127.4, 127.0, 126.9, 121.5, 120.8, 114.9 (d,  $J = 22.4$  Hz), 98.1, 79.4, 70.4, 36.6, 17.0, 13.5;  $^{19}\text{F}$  NMR (376 MHz,  $\text{CDCl}_3$ )  $\delta$  -106.0; IR (neat):  $\nu$  3060, 2972, 2925, 1766, 1662, 1450, 1341, 1156, 1087, 1025, 878, 757, 688  $\text{cm}^{-1}$ ; HRMS (ESI-TOF) Calcd for  $\text{C}_{20}\text{H}_{19}\text{NO}_2\text{Na}$   $[\text{M}+\text{Na}]^+$ : 440.10910, found: 440.10925.

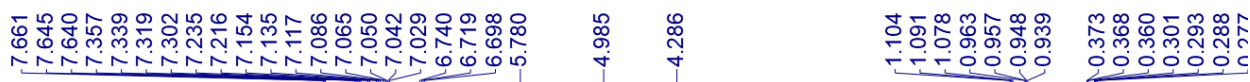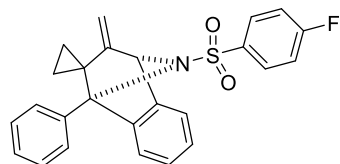

( $^1\text{H}$  NMR, 400 MHz,  $\text{CDCl}_3$ )

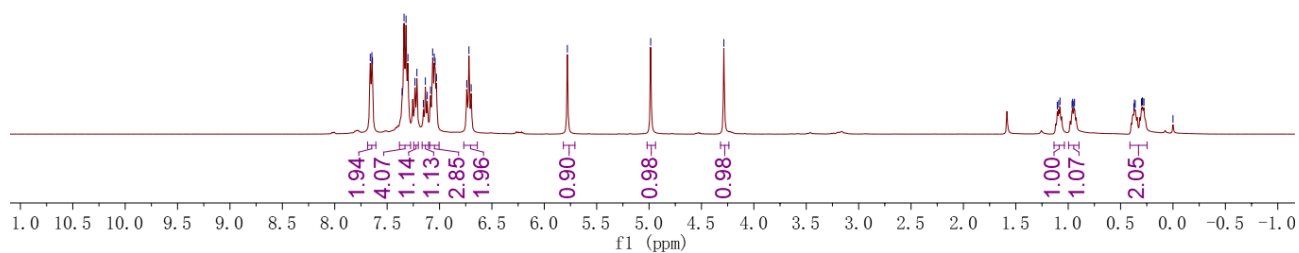

165.821  
 163.291  
 151.289  
 145.928  
 142.802  
 135.467  
 131.563  
 130.959  
 130.865  
 130.326  
 128.539  
 127.372  
 126.967  
 126.911  
 121.530  
 120.791  
 115.055  
 114.831  
 98.149  
 79.438  
 77.318  
 77.000  
 76.683  
 70.392  
 -36.561  
 -16.959  
 -13.543

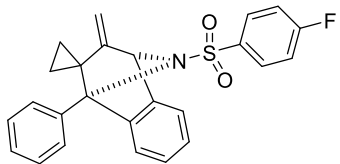

(<sup>13</sup>C NMR, 100 MHz, CDCl<sub>3</sub>)

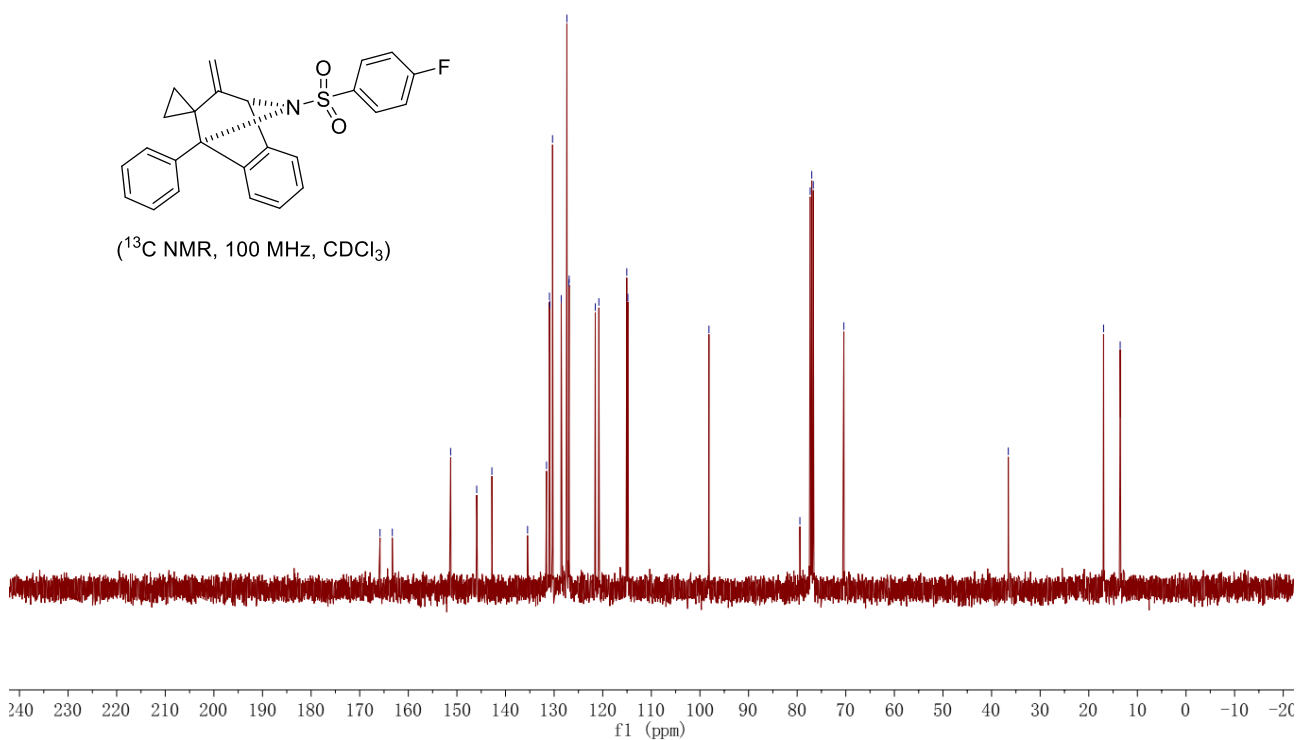

---106.035

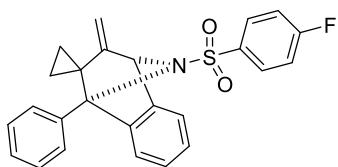

(<sup>19</sup>F NMR, 376 MHz, CDCl<sub>3</sub>)

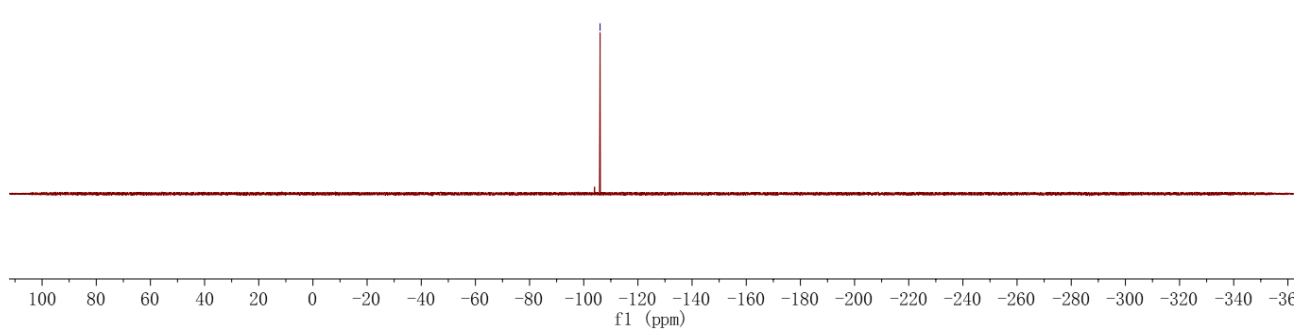

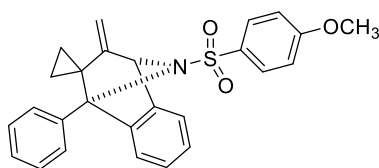

**9'-((4-methoxyphenyl)sulfonyl)-3'-methylene-1'-phenyl-3',4'-dihydro-1'H-spiro[cyclopropane-1,2'-[1,4]epiminonaphthalene] (3w):** Yield: 19 mg, 22%, white solid, m.p. 187-189 °C; Eluent: PE/EA = 30/1. <sup>1</sup>H NMR (400 MHz, CDCl<sub>3</sub>, TMS) δ 7.65 (d, *J* = 6.8 Hz, 2H), 7.41 – 7.27 (m, 5H), 7.21 (d, *J* = 7.2 Hz, 1H), 7.12 (t, *J* = 7.6 Hz, 1H), 7.08 – 6.95 (m, 3H), 6.52 (d, *J* = 8.4 Hz, 2H), 5.76 (s, 1H), 4.97 (s, 1H), 4.26 (s, 1H), 3.74 (s, 3H), 1.14 – 1.03 (m, 1H), 0.98 – 0.86 (m, 1H), 0.43 – 0.32 (m, 1H), 0.32 – 0.21 (m, 1H); <sup>13</sup>C{<sup>1</sup>H}-NMR (100 MHz, CDCl<sub>3</sub>, TMS) δ 162.3, 151.7, 146.1, 142.9, 131.9, 131.3, 130.3, 130.2, 128.3, 127.3, 126.8, 126.8, 121.4, 120.7, 113.0, 97.8, 79.3, 70.4, 55.4, 36.5, 16.9, 13.5; IR (neat): ν 3045, 2985, 2917, 1667, 1594, 1492, 1340, 1257, 1088, 866, 695 cm<sup>-1</sup>; HRMS (ESI-TOF) Calcd for C<sub>20</sub>H<sub>19</sub>NO<sub>2</sub>Na [M+Na]<sup>+</sup>: 452.12909, found: 452.12960.

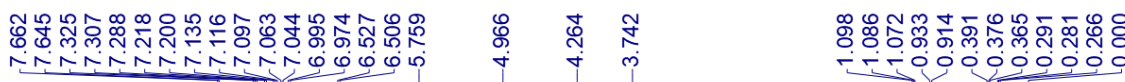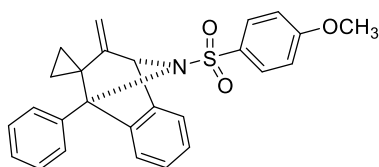

(<sup>1</sup>H NMR, 400 MHz, CDCl<sub>3</sub>)

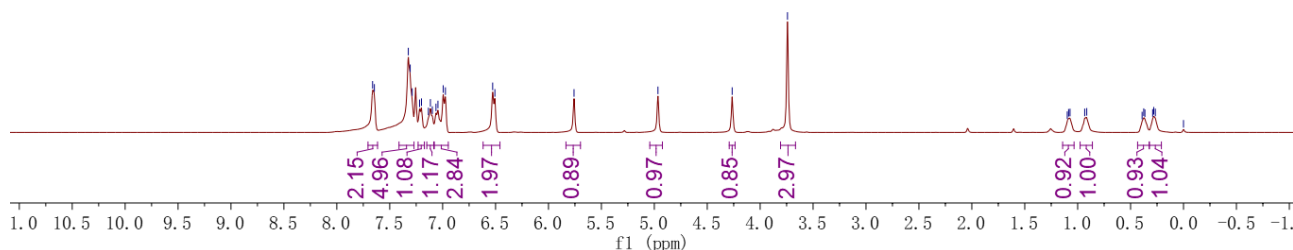

162.304  
 151.694  
 146.144  
 142.923  
 131.925  
 131.257  
 130.279  
 130.247  
 128.299  
 127.265  
 126.846  
 126.755  
 121.428  
 120.660  
 113.026  
 97.834  
 79.279  
 77.318  
 77.209  
 77.001  
 76.682  
 70.385  
 55.449  
 36.504  
 16.883  
 13.472

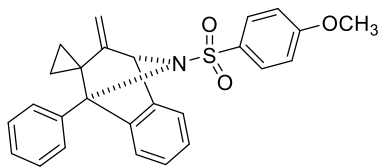

(<sup>13</sup>C NMR, 100 MHz, CDCl<sub>3</sub>)

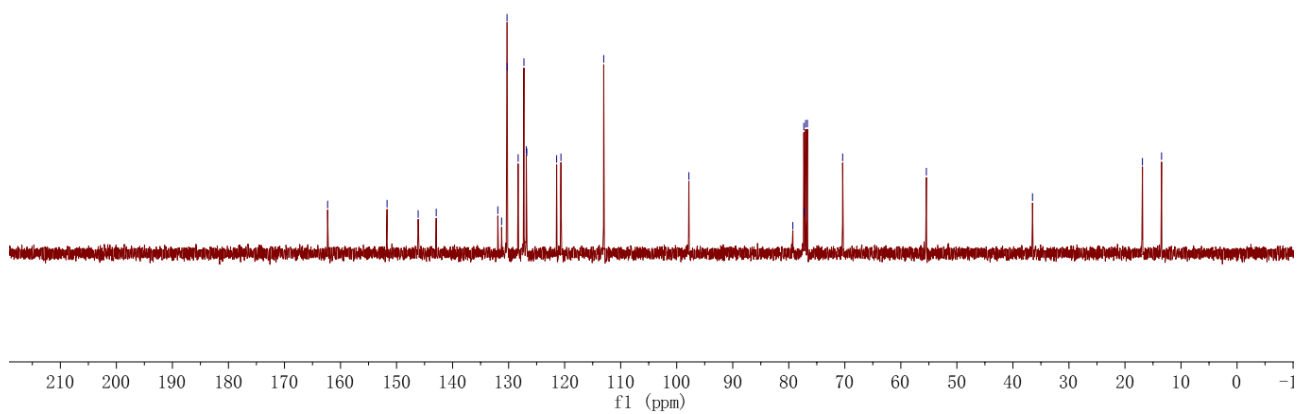

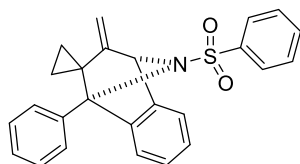

**3'-methylene-1'-phenyl-9'-(phenylsulfonyl)-3',4'-dihydro-1'H-spiro[cyclopropane-1,2'-[1,4]epiminonaphthalene] (3x):** Yield: 23 mg, 29%, white solid, m.p. 149-151 °C; Eluent: PE/EA = 30/1. <sup>1</sup>H NMR (400 MHz, CDCl<sub>3</sub>, TMS) δ 7.63 (d, *J* = 7.2 Hz, 2H), 7.41 – 7.22 (m, 6H), 7.18 (d, *J* = 7.6 Hz, 1H), 7.15 – 7.00 (m, 5H), 5.79 (s, 1H), 4.97 (s, 1H), 4.27 (s, 1H), 1.17 – 1.05 (m, 1H), 0.98 – 0.85 (m, 1H), 0.44 – 0.22 (m, 2H); <sup>13</sup>C{<sup>1</sup>H}-NMR (100 MHz, CDCl<sub>3</sub>, TMS) δ 151.6, 146.1, 142.8, 139.5, 131.9, 131.7, 130.2, 128.3, 128.1, 127.8, 127.3, 126.8, 126.8, 121.4, 120.6, 97.9, 79.3, 70.3, 36.4, 16.9, 13.5; IR (neat): ν 3058, 2925, 2852, 1777, 1590, 1492, 1361, 1238, 1088, 838, 697 cm<sup>-1</sup>; HRMS (ESI-TOF) Calcd for C<sub>20</sub>H<sub>19</sub>NO<sub>2</sub>Na [M+Na]<sup>+</sup>: 422.11852, found: 422.11807.

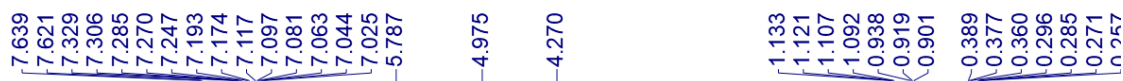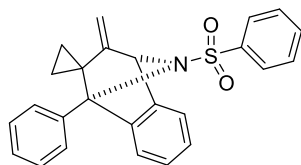

(<sup>1</sup>H NMR, 400 MHz, CDCl<sub>3</sub>)

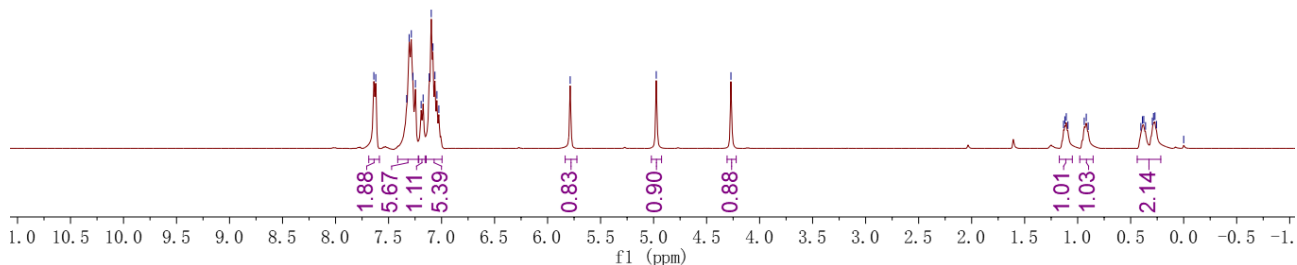

151.606  
146.064  
142.814  
139.504  
131.916  
131.724  
130.209  
128.344  
128.119  
127.826  
127.294  
126.835  
126.798  
121.389  
120.625  
-97.943  
79.344  
77.317  
77.202  
76.999  
76.681  
70.274  
-36.399  
-16.925  
-13.549

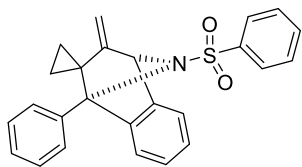

(<sup>13</sup>C NMR, 100 MHz, CDCl<sub>3</sub>)

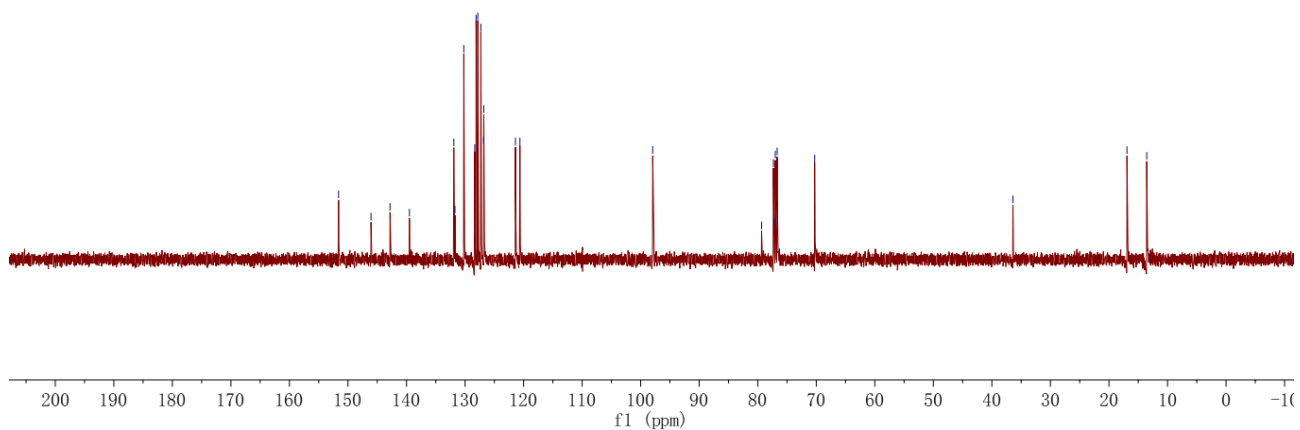

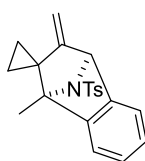

***N*,4-dimethyl-*N*-(1'-methyl-3'-methylene-3',4'-dihydro-1'H-spiro[cyclopropane-1,2'-naphthalen]-1'-yl)benzenesulfonamide (3af):** Yield: 23 mg, 32%, white solid, m.p. 181-183 °C; Eluent: PE/EA = 30/1. <sup>1</sup>H NMR (400 MHz, CDCl<sub>3</sub>, TMS) δ 7.49 (d, *J* = 8.0 Hz, 2H), 7.11 – 7.06 (m, 1H), 7.02 (d, *J* = 8.0 Hz, 2H), 6.99 – 6.94 (m, 2H), 6.85 – 6.73 (m, 1H), 5.49 (s, 1H), 4.90 (s, 1H), 4.18 (s, 1H), 2.29 (s, 3H), 1.58 (s, 3H), 1.13 – 1.05 (m, 1H), 0.56 – 0.48 (m, 1H), 0.44 – 0.27 (m, 2H); <sup>13</sup>C{<sup>1</sup>H}-NMR (100 MHz, CDCl<sub>3</sub>, TMS) δ 151.5, 146.4, 142.8, 142.5, 136.4, 128.8, 128.1, 126.6, 126.5, 120.0, 118.1, 98.5, 72.6, 69.8, 33.2, 21.3, 14.0, 11.4, 11.1; IR (neat): ν 3076, 3000, 2935, 1670, 1594, 1461, 1331, 1159, 1089, 773, 656 cm<sup>-1</sup>; HRMS (ESI-TOF) Calcd for C<sub>20</sub>H<sub>19</sub>NO<sub>2</sub>Na [M+Na]<sup>+</sup>: 374.11852, found: 374.11823.

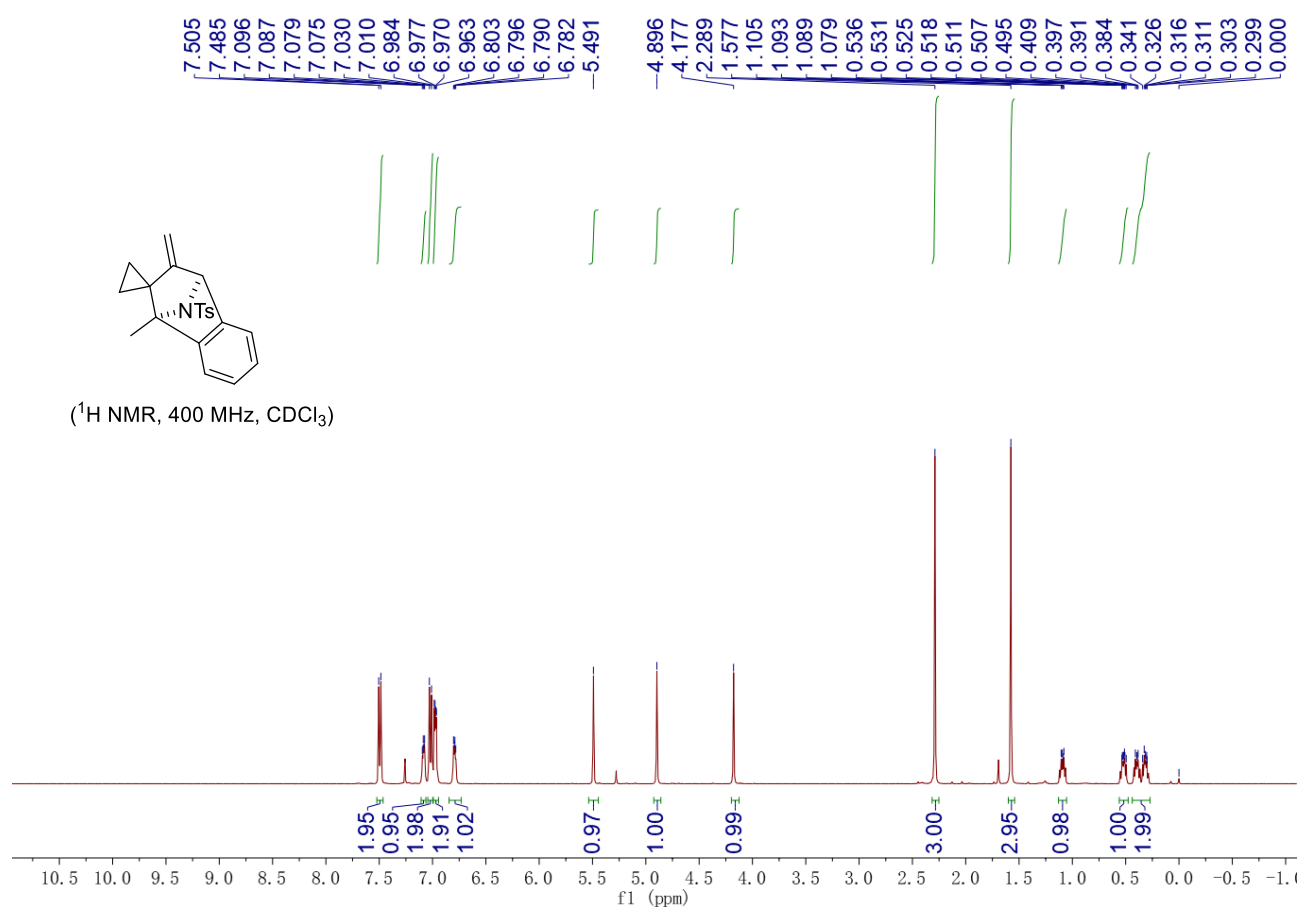



151.525  
146.386  
142.839  
142.451  
136.418  
128.805  
128.088  
126.568  
126.474  
119.973  
118.053

-98.509

77.319  
77.001  
76.682  
72.610  
69.798

-33.179

-21.327  
14.008  
11.378  
11.122

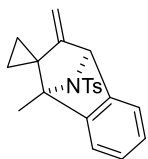

(<sup>13</sup>C NMR, 100 MHz, CDCl<sub>3</sub>)

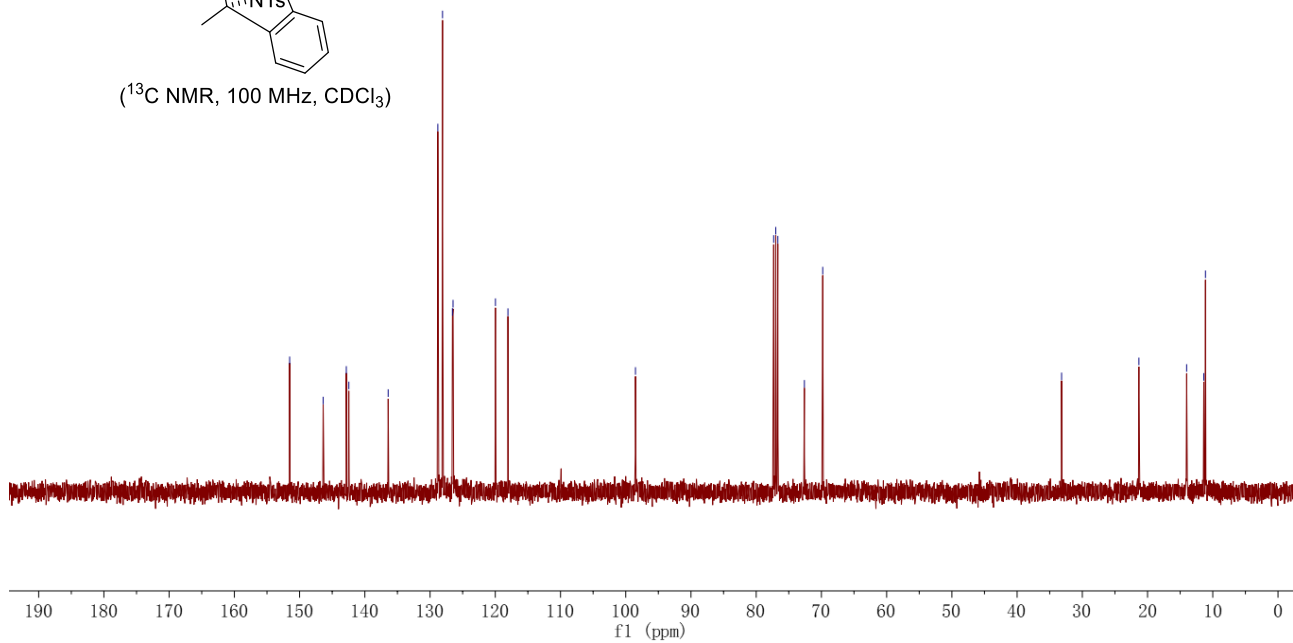

## 7. X-ray Data

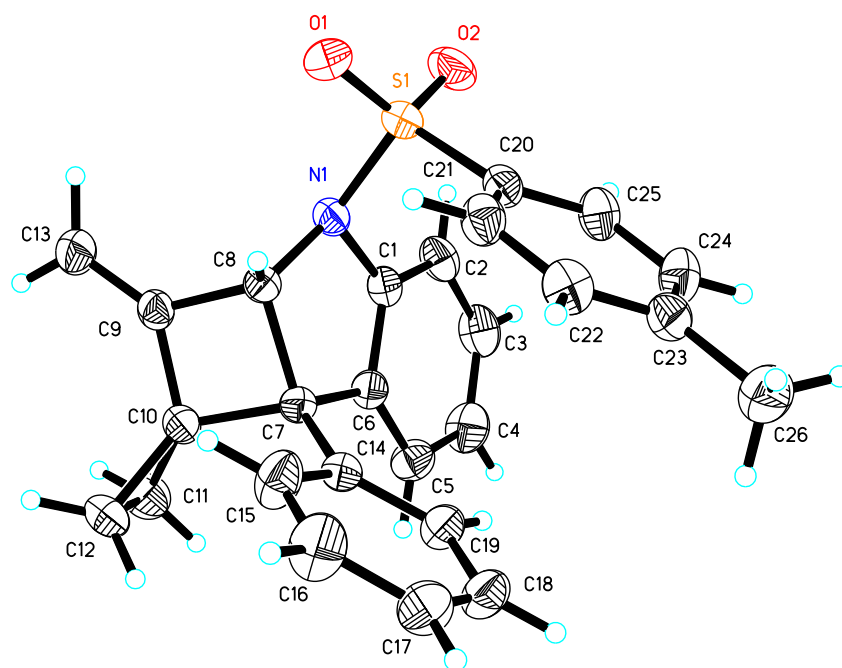

Single crystals of **2a** were grown in dichloromethane and hexanes. Dichloromethane (2.0 mL) was added to **2a** (25 mg in a 4 mL vial) followed by 2 drops of hexanes. The 5 mL vial was capped and placed at room temperature in the experimental cabinet for 2 days, whereupon crystals formed.

A colorless crystal of **2a** was used for the X-ray crystallographic analysis. The X-ray intensity data were measured at 293(2) K, on a Rigaku AFC7R diffractometer. The crystal data of **2a** have been deposited in CCDC with number 2053911 and displayed at 30% ellipsoid contour probability level.

**Table S2. Crystal data and structure refinement for 2a.**

|                                   |                                                   |                   |
|-----------------------------------|---------------------------------------------------|-------------------|
| Identification code               | <b>2a</b>                                         |                   |
| Empirical formula                 | C <sub>26</sub> H <sub>23</sub> NO <sub>2</sub> S |                   |
| Formula weight                    | 413.51                                            |                   |
| Temperature                       | 293(2) K                                          |                   |
| Wavelength                        | 0.71073 Å                                         |                   |
| Crystal system                    | Monoclinic                                        |                   |
| Space group                       | P 21/c                                            |                   |
| Unit cell dimensions              | a = 8.9811(3) Å                                   | a = 90°           |
|                                   | b = 18.8774(5) Å                                  | b = 106.4060(10)° |
|                                   | c = 13.1287(4) Å                                  | g = 90°           |
| Volume                            | 2135.21(11) Å <sup>3</sup>                        |                   |
| Z                                 | 4                                                 |                   |
| Density (calculated)              | 1.286 Mg/m <sup>3</sup>                           |                   |
| Absorption coefficient            | 0.174 mm <sup>-1</sup>                            |                   |
| F(000)                            | 872                                               |                   |
| Crystal size                      | 0.200 x 0.150 x 0.120 mm <sup>3</sup>             |                   |
| Theta range for data collection   | 2.599 to 26.000°                                  |                   |
| Index ranges                      | -11<=h<=9, -23<=k<=23, -15<=l<=16                 |                   |
| Reflections collected             | 22842                                             |                   |
| Independent reflections           | 4162 [R(int) = 0.0350]                            |                   |
| Completeness to theta = 25.242°   | 99.4 %                                            |                   |
| Absorption correction             | Semi-empirical from equivalents                   |                   |
| Max. and min. transmission        | 0.7456 and 0.6505                                 |                   |
| Refinement method                 | Full-matrix least-squares on F <sup>2</sup>       |                   |
| Data / restraints / parameters    | 4162 / 0 / 281                                    |                   |
| Goodness-of-fit on F <sup>2</sup> | 1.029                                             |                   |
| Final R indices [I>2sigma(I)]     | R1 = 0.0422, wR2 = 0.1060                         |                   |
| R indices (all data)              | R1 = 0.0535, wR2 = 0.1152                         |                   |
| Extinction coefficient            | 0.021(3)                                          |                   |
| Largest diff. peak and hole       | 0.237 and -0.273 e.Å <sup>-3</sup>                |                   |

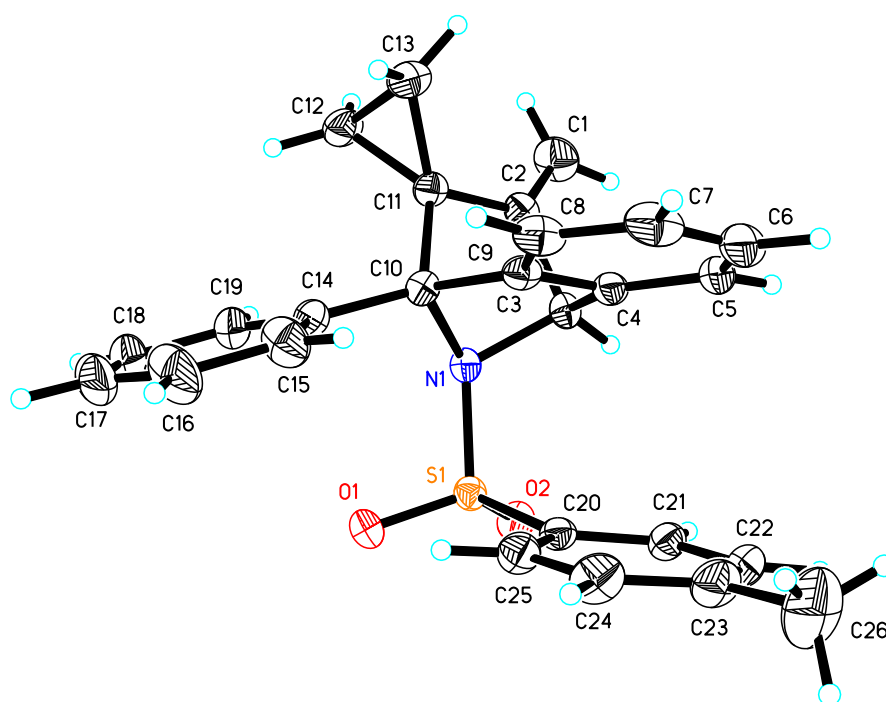

Single crystals of **3a** were grown in dichloromethane and hexanes. Ethyl acetate (2.0 mL) was added to **3a** (30 mg in a 4 mL vial) followed by 2 drops of hexanes. The 5 mL vial was capped and placed at room temperature in the experimental cabinet for 4 days or longer if necessary, whereupon crystals formed. A colorless crystal of **3a** was used for the X-ray crystallographic analysis. The X-ray intensity data were measured at 293(2) K, on a Rigaku AFC7R diffractometer. The crystal data of **3a** have been deposited in CCDC with number 2098330 and displayed at 30% ellipsoid contour probability level.

**Table S3. Crystal data and structure refinement for 3a**

|                                   |                                                   |                  |
|-----------------------------------|---------------------------------------------------|------------------|
| Identification code               | <b>3a</b>                                         |                  |
| Empirical formula                 | C <sub>26</sub> H <sub>23</sub> NO <sub>2</sub> S |                  |
| Formula weight                    | 413.51                                            |                  |
| Temperature                       | 293(2) K                                          |                  |
| Wavelength                        | 0.71073 Å                                         |                  |
| Crystal system                    | Monoclinic                                        |                  |
| Space group                       | P 21/c                                            |                  |
| Unit cell dimensions              | a = 11.2784(4) Å                                  | a = 90°          |
|                                   | b = 8.8889(3) Å                                   | b = 99.1490(10)° |
|                                   | c = 21.1110(7) Å                                  | g = 90°          |
| Volume                            | 2089.51(12) Å <sup>3</sup>                        |                  |
| Z                                 | 4                                                 |                  |
| Density (calculated)              | 1.314 Mg/m <sup>3</sup>                           |                  |
| Absorption coefficient            | 0.178 mm <sup>-1</sup>                            |                  |
| F(000)                            | 872                                               |                  |
| Crystal size                      | 0.200 x 0.150 x 0.120 mm <sup>3</sup>             |                  |
| Theta range for data collection   | 2.997 to 25.999°                                  |                  |
| Index ranges                      | -13<=h<=13, -10<=k<=10, -26<=l<=26                |                  |
| Reflections collected             | 41384                                             |                  |
| Independent reflections           | 4073 [R(int) = 0.0701]                            |                  |
| Completeness to theta = 25.242°   | 99.5 %                                            |                  |
| Absorption correction             | Semi-empirical from equivalents                   |                  |
| Max. and min. transmission        | 0.7456 and 0.5417                                 |                  |
| Refinement method                 | Full-matrix least-squares on F <sup>2</sup>       |                  |
| Data / restraints / parameters    | 4073 / 0 / 273                                    |                  |
| Goodness-of-fit on F <sup>2</sup> | 1.029                                             |                  |
| Final R indices [I>2sigma(I)]     | R1 = 0.0400, wR2 = 0.1068                         |                  |
| R indices (all data)              | R1 = 0.0461, wR2 = 0.1135                         |                  |
| Extinction coefficient            | 0.023(3)                                          |                  |
| Largest diff. peak and hole       | 0.306 and -0.397 e.Å <sup>-3</sup>                |                  |

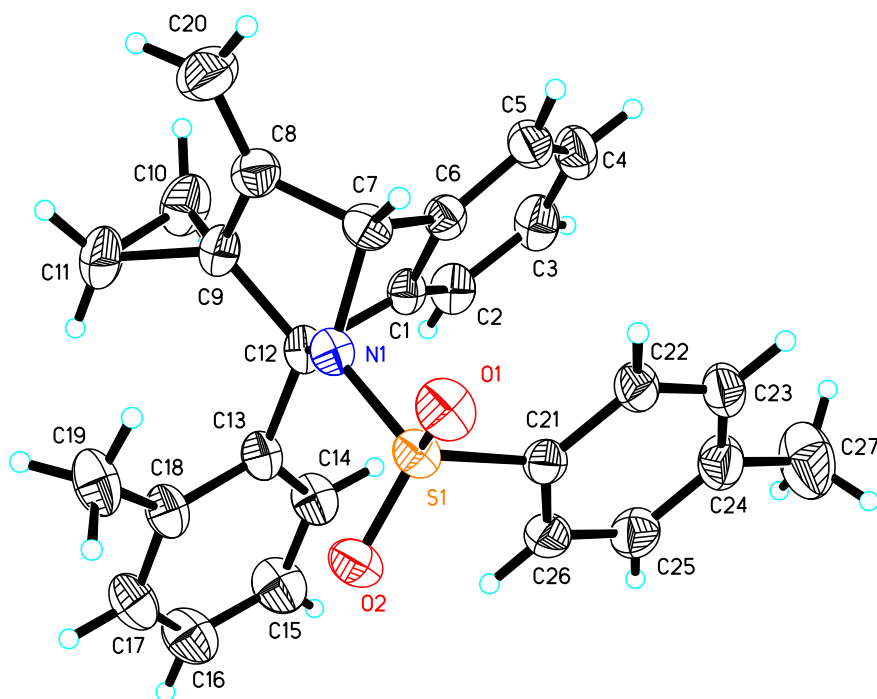

Single crystals of **3i** were grown in dichloromethane and hexanes. Ethyl acetate (2.0 mL) was added to **3i** (20 mg in a 4 mL vial) followed by 2 drops of hexanes. The 5 mL vial was capped and placed at room temperature in the experimental cabinet for 3 days or longer if necessary, whereupon crystals formed. A colorless crystal of **3i** was used for the X-ray crystallographic analysis. The X-ray intensity data were measured at 293(2) K, on a Rigaku AFC7R diffractometer. The crystal data of **3i** have been deposited in CCDC with number 2115147 and displayed at 30% ellipsoid contour probability level.

**Table S4. Crystal data and structure refinement for 3i**

|                                   |                                                   |                  |
|-----------------------------------|---------------------------------------------------|------------------|
| Identification code               | <b>3i</b>                                         |                  |
| Empirical formula                 | C <sub>27</sub> H <sub>25</sub> NO <sub>2</sub> S |                  |
| Formula weight                    | 427.54                                            |                  |
| Temperature                       | 293(2) K                                          |                  |
| Wavelength                        | 0.71073 Å                                         |                  |
| Crystal system                    | Monoclinic                                        |                  |
| Space group                       | P 21/c                                            |                  |
| Unit cell dimensions              | a = 11.5309(4) Å                                  | a = 90°          |
|                                   | b = 9.3578(3) Å                                   | b = 96.3810(10)° |
|                                   | c = 20.9960(9) Å                                  | g = 90°          |
| Volume                            | 2251.51(14) Å <sup>3</sup>                        |                  |
| Z                                 | 4                                                 |                  |
| Density (calculated)              | 1.261 Mg/m <sup>3</sup>                           |                  |
| Absorption coefficient            | 0.167 mm <sup>-1</sup>                            |                  |
| F(000)                            | 904                                               |                  |
| Crystal size                      | 0.200 x 0.150 x 0.120 mm <sup>3</sup>             |                  |
| Theta range for data collection   | 2.924 to 26.000°                                  |                  |
| Index ranges                      | -14<=h<=13, -11<=k<=11, -25<=l<=25                |                  |
| Reflections collected             | 22194                                             |                  |
| Independent reflections           | 4397 [R(int) = 0.0443]                            |                  |
| Completeness to theta = 25.242°   | 99.2 %                                            |                  |
| Absorption correction             | Semi-empirical from equivalents                   |                  |
| Max. and min. transmission        | 0.7456 and 0.6393                                 |                  |
| Refinement method                 | Full-matrix least-squares on F <sup>2</sup>       |                  |
| Data / restraints / parameters    | 4397 / 0 / 291                                    |                  |
| Goodness-of-fit on F <sup>2</sup> | 1.024                                             |                  |
| Final R indices [I>2sigma(I)]     | R1 = 0.0390, wR2 = 0.1013                         |                  |
| R indices (all data)              | R1 = 0.0490, wR2 = 0.1101                         |                  |
| Extinction coefficient            | 0.051(4)                                          |                  |
| Largest diff. peak and hole       | 0.206 and -0.345 e.Å <sup>-3</sup>                |                  |

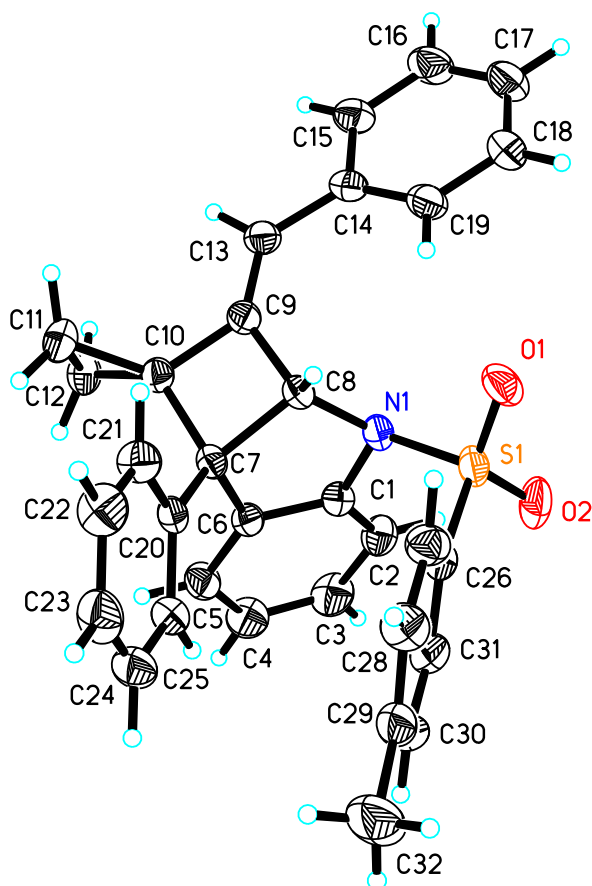

Single crystals of **2t** were grown in dichloromethane and hexanes. Ethyl acetate (2.0 mL) was added to **2t** (30 mg in a 4 mL vial) followed by 2 drops of hexanes. The 5 mL vial was capped and placed at room temperature in the experimental cabinet for 4 days or longer if necessary, whereupon crystals formed. A colorless crystal of **2t** was used for the X-ray crystallographic analysis. The X-ray intensity data were measured at 293(2) K, on a Rigaku AFC7R diffractometer. The crystal data of **2t** have been deposited in CCDC with number 2124437. Displayed at 30% ellipsoid contour probability level.



**Table S5. Crystal data and structure refinement for 2t.**

|                                   |                                                   |                  |
|-----------------------------------|---------------------------------------------------|------------------|
| Identification code               | <b>2t</b>                                         |                  |
| Empirical formula                 | C <sub>32</sub> H <sub>27</sub> NO <sub>2</sub> S |                  |
| Formula weight                    | 489.60                                            |                  |
| Temperature                       | 293(2) K                                          |                  |
| Wavelength                        | 0.71073 Å                                         |                  |
| Crystal system                    | Monoclinic                                        |                  |
| Space group                       | P 21/n                                            |                  |
| Unit cell dimensions              | a = 9.0253(3) Å                                   | a = 90°          |
|                                   | b = 15.0177(6) Å                                  | b = 97.7000(10)° |
|                                   | c = 18.9324(8) Å                                  | g = 90°          |
| Volume                            | 2542.95(17) Å <sup>3</sup>                        |                  |
| Z                                 | 4                                                 |                  |
| Density (calculated)              | 1.279 Mg/m <sup>3</sup>                           |                  |
| Absorption coefficient            | 0.158 mm <sup>-1</sup>                            |                  |
| F(000)                            | 1032                                              |                  |
| Crystal size                      | 0.200 x 0.150 x 0.120 mm <sup>3</sup>             |                  |
| Theta range for data collection   | 2.560 to 25.997°                                  |                  |
| Index ranges                      | -11<=h<=11, -18<=k<=18, -18<=l<=23                |                  |
| Reflections collected             | 25697                                             |                  |
| Independent reflections           | 4968 [R(int) = 0.0365]                            |                  |
| Completeness to theta = 25.242°   | 99.5 %                                            |                  |
| Absorption correction             | Semi-empirical from equivalents                   |                  |
| Max. and min. transmission        | 0.7456 and 0.6416                                 |                  |
| Refinement method                 | Full-matrix least-squares on F <sup>2</sup>       |                  |
| Data / restraints / parameters    | 4968 / 0 / 327                                    |                  |
| Goodness-of-fit on F <sup>2</sup> | 1.039                                             |                  |
| Final R indices [I>2sigma(I)]     | R1 = 0.0410, wR2 = 0.0953                         |                  |
| R indices (all data)              | R1 = 0.0570, wR2 = 0.1061                         |                  |
| Extinction coefficient            | 0.0119(19)                                        |                  |
| Largest diff. peak and hole       | 0.191 and -0.314 e.Å <sup>-3</sup>                |                  |

## 8. References

- 1) K. Chen, R. Sun, Q. Xu, Y. Wei, M. Shi, Thermal induced intramolecular [2 + 2] cycloaddition of allene-ACPs, *Org. Biomol. Chem.*, 2013, **11**, 3949-3953.
- 2) (a) K. Chen, Z.-Z. Zhu, J.-X. Liu, X.-Y. Tang, Y. Wei and M. Shi, Substrate-controlled Rh(ii)-catalyzed single-electron-transfer (SET): divergent synthesis of fused indoles, *Chem. Commun.*, 2016, **52**, 350-353; (b) X.-S. Ning, X. Liang, K.-F. Hu, C.-Z. Yao, J.-P. Qu and Y.-B. Kang, Pd-tBuONO Cocatalyzed Aerobic Indole Synthesis, *Adv. Synth. Catal.*, 2018, **360**, 1590-1594.
